# Supplementary material for: Maize leaves salt-responsive genes revealed by comparative transcriptome of salt-tolerant and salt-sensitive cultivars during the seedling stage
Source: PeerJ. 2025 Apr 10;13:e19268. doi: 10.7717/peerj.19268 (PMC11994069; doi:10.7717/peerj.19268)
Supplement: Supplemental Information 2 [file peerj-13-19268-s002.xlsx]

## Sheet: Sheet1
Table S1. Primers used in this study.
Primer Name	Sequences (5’-3’)		Amplicon length
	Forward	Reverse
GAPDH	GGGATTGCCGATCGTATGAG	GAGCCACCGATCCAGACACT	152
ZmbZIP21	ACTCCCAGCACGGTGTCTAC	TCGACTCCTTGCGCTTG	102
ZmGLK4	ATACCGCCTCTGCCTAATGA	CCCAGATTCACGTGTGTACG	123
ZmNAC47	TCGTGTGTGCTCTCCAAGAC	TGATCCCTTCAATGTCAGCA	135
ZmWRKY38	ACATCAAGGAGCTGGTGAGG	GGTTGGAGGATGTGATGAGG	141
ZmAUX21	GGAACCTGAGAAGCAGCAAC	CAGCGGAGAGGTCCTTGTAG	108
ZmbHLH96	AGGAGCAGAACCTCCTAGCC	GTACCAGTCGTCATCGAGCA	115
ZmBZR7	GTAGTTCGTGCCTTCGTGGT	ATCGACTGTTCCGATTCACC	136
ZmMYB74	CTGGCACACCTTATGGGACT	CTAACAGGAGGAGCGCATTC	122
