# Supplementary material for: Maize leaves salt-responsive genes revealed by comparative transcriptome of salt-tolerant and salt-sensitive cultivars during the seedling stage
Source: PeerJ. 2025 Apr 10;13:e19268. doi: 10.7717/peerj.19268 (PMC11994069; doi:10.7717/peerj.19268)
Supplement: Supplemental Information 3 [file peerj-13-19268-s003.xlsx]

## Sheet: Description
	Table S2. RNA-seq results for ST and ST maize cultivars used in the study.

## Sheet: ST0_vs_SS0
Differentially expressed genes in SS0 vs. ST0 comparison.
gene_id	gene_name	transcript_id	GO	KEGG	KO_ENTRY	EC	Description	trans_type	FPKM.ST0_1	FPKM.ST0_2	FPKM.ST0_3	FPKM.SS0_1	FPKM.SS0_2	FPKM.SS0_3	fc	log2(fc)	pval	qval	regulation	significant
Zm00001d052011	Zm00001d052011	Zm00001d052011_T006;Zm00001d052011_T002;Zm00001d052011_T005;Zm00001d052011_T001;Zm00001d052011_T004;Zm00001d052011_T003;Zm00001d052011_T007	GO:0004566(beta-glucuronidase activity);GO:0009505(plant-type cell wall);GO:0016020(membrane);GO:0016798(hydrolase activity, acting on glycosyl bonds);GO:0016798(hydrolase activity, acting on glycosyl bonds)	NA	NA	NA	Heparanase-like protein 3	protein_coding	0.0001	0.0001	0.0157082	12.341	15.4781	14.6518	0.000374567	-11.3825	6.63119e-74	1.41079e-69	down	yes
Zm00001d025423	Zm00001d025423	Zm00001d025423_T001	GO:0005747(mitochondrial respiratory chain complex I)	NA	NA	NA	F1N21.17	protein_coding	0.344488	0.471811	0.355571	236.445	336.91	229.234	0.00146011	-9.41971	6.74836e-69	6.15006e-65	down	yes
Zm00001d001192	Zm00001d001192	Zm00001d001192_T001	NA	NA	NA	NA		lincRNA	66.5154	150.616	120.724	0.189608	0.156911	0.180133	641.516	9.32534	8.67224e-69	6.15006e-65	up	yes
Zm00001d049732	Zm00001d049732	Zm00001d049732_T001	GO:0009055(electron transfer activity);GO:0009507(chloroplast);GO:0009536(plastid);GO:0022900(electron transport chain);GO:0046872(metal ion binding);GO:0051536(iron-sulfur cluster binding);GO:0051537(2 iron, 2 sulfur cluster binding);GO:0055114(oxidation-reduction process)	00195(Photosynthesis)	K02639	NA	Ferredoxin-1	protein_coding	1251.1	3476.03	3890.11	0.550788	1.25019	0.472278	3790.69	11.8882	5.76058e-67	3.06391e-63	up	yes
Zm00001d008329	Zm00001d008329	Zm00001d008329_T001	GO:0005739(mitochondrion)	NA	NA	NA	Zinc inducible protein	protein_coding	0.0001	0.095683	0.0001	341.794	178.25	149.255	0.000143259	-12.7691	1.3069e-64	5.56085e-61	down	yes
Zm00001d003452	Zm00001d003452	Zm00001d003452_T002;Zm00001d003452_T001	NA	NA	NA	NA		protein_coding	0.0001	0.0316934	0.066768	26.2209	36.3767	26.7262	0.00110342	-9.82381	1.63843e-64	5.8096e-61	down	yes
Zm00001d003267	Zm00001d003267	Zm00001d003267_T029;Zm00001d003267_T017;Zm00001d003267_T033;Zm00001d003267_T032;Zm00001d003267_T020;Zm00001d003267_T019;Zm00001d003267_T039;Zm00001d003267_T031;Zm00001d003267_T004;Zm00001d003267_T035;Zm00001d003267_T048;Zm00001d003267_T014;Zm00001d003267_T045;Zm00001d003267_T060;Zm00001d003267_T005;Zm00001d003267_T013;Zm00001d003267_T052;Zm00001d003267_T036;Zm00001d003267_T026;Zm00001d003267_T040…	GO:0003677(DNA binding);GO:0005515(protein binding);GO:0005524(ATP binding);GO:0006270(DNA replication initiation);GO:0006270(DNA replication initiation)	NA	NA	NA		protein_coding	0.0001	0.0001	0.0001	3.99264	3.92125	5.23027	2.28238e-05	-15.4191	2.00496e-64	6.09365e-61	down	yes
Zm00001d049254	Zm00001d049254	Zm00001d049254_T001	GO:0003723(RNA binding);GO:0003735(structural constituent of ribosome);GO:0004386(helicase activity);GO:0005840(ribosome);GO:0006412(translation);GO:0022627(cytosolic small ribosomal subunit)	NA	NA	NA	DEAD-box ATP-dependent RNA helicase 7	protein_coding	41.8098	42.0903	44.9843	0.0001	0.0001	0.079041	1626.49	10.6675	3.2088e-64	8.53339e-61	up	yes
Zm00001d017487	Zm00001d017487	Zm00001d017487_T004;Zm00001d017487_T005;Zm00001d017487_T003;Zm00001d017487_T002;Zm00001d017487_T006;Zm00001d017487_T001	NA	NA	NA	NA		protein_coding	6.38036	8.22256	5.72551	0.0001	0.0001	0.0001	67761.4	16.0482	3.63292e-64	8.58781e-61	up	yes
Zm00001d008844	Zm00001d008844	Zm00001d008844_T001	NA	NA	NA	NA		protein_coding	0.0001	0.0001	0.14073	65.6166	52.6666	64.835	0.000769612	-10.3436	6.05402e-64	1.28799e-60	down	yes
Zm00001d025528	Zm00001d025528	Zm00001d025528_T001;Zm00001d025528_T003;Zm00001d025528_T002	GO:0004032(alditol:NADP+ 1-oxidoreductase activity);GO:0005829(cytosol);GO:0008106(alcohol dehydrogenase (NADP+) activity);GO:0016491(oxidoreductase activity);GO:0055114(oxidation-reduction process);GO:0055114(oxidation-reduction process)	NA	NA	NA	NAD(P)-linked oxidoreductase superfamily protein	protein_coding	12.5788	26.308	26.3575	0.0133634	0.0312851	0.0001	1458.02	10.5098	4.68169e-63	9.05482e-60	up	yes
Zm00001d017521	Zm00001d017521	Zm00001d017521_T004;Zm00001d017521_T003;Zm00001d017521_T002;Zm00001d017521_T001	GO:0005975(carbohydrate metabolic process);GO:0006004(fucose metabolic process);GO:0016740(transferase activity);GO:0016757(transferase activity, transferring glycosyl groups);GO:0016757(transferase activity, transferring glycosyl groups)	NA	NA	NA	O-fucosyltransferase family protein	protein_coding	0.0001	0.0001	0.0001	9.09454	8.86822	12.879	9.72707e-06	-16.6496	9.01344e-63	1.59801e-59	down	yes
Zm00001d005741	Zm00001d005741	Zm00001d005741_T001	GO:0016020(membrane);GO:0016021(integral component of membrane);GO:0016655(oxidoreductase activity, acting on NAD(P)H, quinone or similar compound as acceptor);GO:0055114(oxidation-reduction process)	NA	NA	NA	NAD(P)H-quinone oxidoreductase subunit L chloroplastic	protein_coding	202.166	158.978	218.128	0.0001	0.0001	0.209891	2757.24	11.429	2.37214e-62	3.77541e-59	up	yes
Zm00001d049253	Zm00001d049253	Zm00001d049253_T001	GO:0005829(cytosol);GO:0005840(ribosome);GO:0006545(glycine biosynthetic process);GO:0006567(threonine catabolic process);GO:0008732(L-allo-threonine aldolase activity)	NA	NA	NA	40S ribosomal protein S4-3	protein_coding	20.9876	19.5841	20.2876	0.0001	0.0001	0.0001	202864	17.6302	2.48441e-62	3.77541e-59	up	yes
Zm00001d039145	Zm00001d039145	Zm00001d039145_T001	GO:0003676(nucleic acid binding);GO:0003723(RNA binding);GO:0005654(nucleoplasm);GO:0043484(regulation of RNA splicing);GO:1990904(ribonucleoprotein complex)	NA	K12898	NA	RNA-binding (RRM/RBD/RNP motifs) family protein	protein_coding	0.024163	0.022028	0.0001	29.3663	25.2668	31.8624	0.000535184	-10.8677	8.23967e-62	1.16866e-58	down	yes
Zm00001d039146	Zm00001d039146	Zm00001d039146_T001	GO:0004180(carboxypeptidase activity);GO:0004185(serine-type carboxypeptidase activity);GO:0006508(proteolysis);GO:0008233(peptidase activity);GO:0016787(hydrolase activity);GO:0051603(proteolysis involved in cellular protein catabolic process)	NA	NA	NA	Serine carboxypeptidase-like 50	protein_coding	0.0001	0.0001	0.0001	16.3012	16.5707	13.4583	6.47526e-06	-17.2366	9.28157e-62	1.23416e-58	down	yes
Zm00001d012100	Zm00001d012100	Zm00001d012100_T043;Zm00001d012100_T046;Zm00001d012100_T047;Zm00001d012100_T035;Zm00001d012100_T032;Zm00001d012100_T036;Zm00001d012100_T023;Zm00001d012100_T019;Zm00001d012100_T038;Zm00001d012100_T001;Zm00001d012100_T024;Zm00001d012100_T042;Zm00001d012100_T026;Zm00001d012100_T034;Zm00001d012100_T025;Zm00001d012100_T029;Zm00001d012100_T028;Zm00001d012100_T006;Zm00001d012100_T037;Zm00001d012100_T027…	GO:0005737(cytoplasm);GO:0016592(mediator complex);GO:2000762(regulation of phenylpropanoid metabolic process);GO:2000762(regulation of phenylpropanoid metabolic process)	NA	NA	NA		protein_coding	5.85025	10.514	7.21358	0.0213387	0.0001	0.0001	1094.67	10.0963	4.0519e-61	5.07083e-58	up	yes
Zm00001d011253	Zm00001d011253	Zm00001d011253_T001;Zm00001d011253_T008;Zm00001d011253_T009;Zm00001d011253_T006;Zm00001d011253_T003;Zm00001d011253_T007;Zm00001d011253_T005;Zm00001d011253_T004;Zm00001d011253_T002	GO:0004679(AMP-activated protein kinase activity);GO:0005634(nucleus);GO:0005737(cytoplasm);GO:0006468(protein phosphorylation);GO:0016020(membrane);GO:0016021(integral component of membrane);GO:0016208(AMP binding);GO:0019887(protein kinase regulator activity);GO:0019901(protein kinase binding);GO:0031588(nucleotide-activated protein kinase complex);GO:0042149(cellular response to glucose starva…	NA	NA	NA	Sucrose nonfermenting 4-like protein	protein_coding	7.03358	10.9881	10.0624	0.051598	0.0321413	0.029493	248.022	7.95432	4.95956e-61	5.86192e-58	up	yes
Zm00001d027242	Zm00001d027242	Zm00001d027242_T007;Zm00001d027242_T008;Zm00001d027242_T011;Zm00001d027242_T004;Zm00001d027242_T006;Zm00001d027242_T010;Zm00001d027242_T013;Zm00001d027242_T005;Zm00001d027242_T002;Zm00001d027242_T001;Zm00001d027242_T012;Zm00001d027242_T009;Zm00001d027242_T003	GO:0009011(starch synthase activity);GO:0009507(chloroplast);GO:0009507(chloroplast)	NA	NA	NA	Granule-bound starch synthase 1 chloroplastic/amyloplastic	protein_coding	0.0001	0.0001	0.0001	8.30001	4.32216	8.51032	1.41962e-05	-16.1041	6.84378e-61	7.66324e-58	down	yes
Zm00001d017935	Zm00001d017935	Zm00001d017935_T004;Zm00001d017935_T006;Zm00001d017935_T005;Zm00001d017935_T001;Zm00001d017935_T002;Zm00001d017935_T003	GO:0016020(membrane);GO:0016021(integral component of membrane);GO:0016021(integral component of membrane)	NA	NA	NA	zinc ion binding	protein_coding	0.0001	0.027487	0.0001	7.85177	8.42346	10.7719	0.00102366	-9.93205	5.48291e-60	5.83245e-57	down	yes
Zm00001d052619	Zm00001d052619	Zm00001d052619_T001	GO:0003735(structural constituent of ribosome);GO:0005840(ribosome);GO:0006412(translation);GO:0009507(chloroplast)	NA	NA	NA	60S ribosomal protein L23	protein_coding	0.0001	0.0001	0.0001	52.0045	98.3634	36.1259	1.60863e-06	-19.2457	8.17884e-59	8.28595e-56	down	yes
Zm00001d005583	Zm00001d005583	Zm00001d005583_T001	GO:0004722(protein serine/threonine phosphatase activity);GO:0006470(protein dephosphorylation)	NA	NA	NA		protein_coding	66.785	65.171	59.3291	0.014982	0.0001	0.0001	12599.5	13.6211	3.44818e-58	3.33454e-55	up	yes
Zm00001d047690	Zm00001d047690	Zm00001d047690_T004;Zm00001d047690_T003;Zm00001d047690_T002;Zm00001d047690_T001	NA	NA	NA	NA	Nucleic acid-binding proteins superfamily	protein_coding	4.19831	9.20522	8.45579	0.0001	0.0001	0.0001	72864.4	16.1529	5.43963e-58	5.03166e-55	up	yes
Zm00001d030124	Zm00001d030124	Zm00001d030124_T002;Zm00001d030124_T001	NA	NA	NA	NA		protein_coding	26.0381	20.5573	24.8475	0.0001	0.0001	0.0001	238143	17.8615	1.31329e-57	1.16418e-54	up	yes
Zm00001d049823	Zm00001d049823	Zm00001d049823_T001	GO:0003824(catalytic activity);GO:0009116(nucleoside metabolic process)	00270(Cysteine and methionine metabolism)	K01244	EC:3.2.2.16	5'-methylthioadenosine/S-adenosylhomocysteine nucleosidase 2	protein_coding	0.0001	0.092339	0.0001	24.1581	28.9987	22.2788	0.00122673	-9.67097	1.51272e-57	1.28732e-54	down	yes
Zm00001d042064	Zm00001d042064	Zm00001d042064_T007;Zm00001d042064_T008;Zm00001d042064_T005;Zm00001d042064_T001;Zm00001d042064_T013;Zm00001d042064_T012;Zm00001d042064_T009;Zm00001d042064_T006;Zm00001d042064_T002;Zm00001d042064_T004;Zm00001d042064_T011;Zm00001d042064_T014;Zm00001d042064_T003;Zm00001d042064_T010	GO:0009704(de-etiolation);GO:0009845(seed germination);GO:0010218(response to far red light);GO:0016020(membrane);GO:0016021(integral component of membrane);GO:0016787(hydrolase activity);GO:0016810(hydrolase activity, acting on carbon-nitrogen (but not peptide) bonds);GO:0048471(perinuclear region of cytoplasm);GO:0048471(perinuclear region of cytoplasm)	NA	NA	NA	Amidohydrolase family	protein_coding	22.1734	19.3059	22.8516	0.0001	0.0388216	0.0001	1648.6	10.687	1.05265e-55	8.61348e-53	up	yes
Zm00001d033948	Zm00001d033948	Zm00001d033948_T007;Zm00001d033948_T004;Zm00001d033948_T008;Zm00001d033948_T003;Zm00001d033948_T001;Zm00001d033948_T002;Zm00001d033948_T005;Zm00001d033948_T006	GO:0016020(membrane);GO:0016021(integral component of membrane);GO:0016021(integral component of membrane)	NA	NA	NA	Tubby-like F-box protein 2	protein_coding	0.0001	0.0001	0.0001	4.25065	3.63751	6.32321	2.11099e-05	-15.5317	3.71556e-55	2.92772e-52	down	yes
Zm00001d045627	Zm00001d045627	Zm00001d045627_T001	GO:0003723(RNA binding);GO:0003735(structural constituent of ribosome);GO:0005840(ribosome);GO:0006412(translation);GO:0016020(membrane);GO:0016021(integral component of membrane);GO:0016740(transferase activity);GO:0016779(nucleotidyltransferase activity);GO:0022627(cytosolic small ribosomal subunit)	NA	NA	NA	40S ribosomal protein S4-3	protein_coding	0.0001	0.069897	0.070297	23.4344	20.2611	27.9079	0.00195932	-8.99543	5.98952e-55	4.55097e-52	down	yes
Zm00001d007084	Zm00001d007084	Zm00001d007084_T001	GO:0000786(nucleosome);GO:0003677(DNA binding);GO:0005634(nucleus);GO:0005694(chromosome);GO:0006334(nucleosome assembly);GO:0046982(protein heterodimerization activity)	NA	K11252	NA	Histone H2B	protein_coding	77.8614	105.676	155.178	0.400069	0.649468	0.551294	211.587	7.72511	2.48083e-54	1.81999e-51	up	yes
Zm00001d045698	Zm00001d045698	Zm00001d045698_T001	GO:0000287(magnesium ion binding)	NA	NA	NA	Ribulose bisphosphate carboxylase large chain	protein_coding	690.425	630.894	1491.51	1.54661	2.11847	1.75351	519.108	9.01989	6.02335e-54	4.27156e-51	up	yes
Zm00001d044575	Zm00001d044575	Zm00001d044575_T001	GO:0016787(hydrolase activity)	NA	NA	NA	alpha/beta-Hydrolases superfamily protein	protein_coding	0.276814	0.248952	0.178929	79.0002	43.3144	50.1129	0.0040869	-7.93478	6.64342e-53	4.55931e-50	down	yes
Zm00001d051794	Zm00001d051794	Zm00001d051794_T004;Zm00001d051794_T001;Zm00001d051794_T002;Zm00001d051794_T003	NA	NA	NA	NA		protein_coding	0.0001	0.0001	0.0001	11.4355	11.926	11.9715	8.49065e-06	-16.8457	2.11104e-51	1.40351e-48	down	yes
Zm00001d054051	Zm00001d054051	Zm00001d054051_T002;Zm00001d054051_T001	NA	NA	NA	NA	WPP domain-associated protein	protein_coding	0.0001	0.0817004	0.0001	16.3038	15.6662	18.9917	0.0016071	-9.28133	4.26734e-51	2.75114e-48	down	yes
Zm00001d015496	Zm00001d015496	Zm00001d015496_T002;Zm00001d015496_T001	NA	NA	NA	NA		protein_coding	20.0268	15.5375	18.5512	0.0001	0.0001	0.0001	180385	17.4607	8.45927e-51	5.29326e-48	up	yes
Zm00001d012283	Zm00001d012283	Zm00001d012283_T001	GO:0000079(regulation of cyclin-dependent protein serine/threonine kinase activity);GO:0000307(cyclin-dependent protein kinase holoenzyme complex);GO:0005634(nucleus);GO:0005737(cytoplasm);GO:0016538(cyclin-dependent protein serine/threonine kinase regulator activity);GO:0044772(mitotic cell cycle phase transition)	NA	NA	NA		protein_coding	0.23843	0.471761	0.66123	50.902	44.5677	48.2167	0.00954454	-6.71111	1.2416e-50	7.54713e-48	down	yes
Zm00001d030216	Zm00001d030216	Zm00001d030216_T001	GO:0003824(catalytic activity);GO:0004807(triose-phosphate isomerase activity);GO:0005829(cytosol);GO:0006094(gluconeogenesis);GO:0006096(glycolytic process);GO:0016853(isomerase activity);GO:0019563(glycerol catabolic process);GO:0046166(glyceraldehyde-3-phosphate biosynthetic process)	NA	NA	NA	Triosephosphate isomerase cytosolic	protein_coding	0.0001	0.0001	0.0001	15.0464	18.202	15.2039	6.19166e-06	-17.3012	3.1025e-50	1.80074e-47	down	yes
Zm00001d043896	Zm00001d043896	Zm00001d043896_T001	NA	NA	NA	NA		protein_coding	0.0001	0.0001	0.0001	18.4821	12.7087	17.9117	6.10967e-06	-17.3205	3.13172e-50	1.80074e-47	down	yes
Zm00001d005030	Zm00001d005030	Zm00001d005030_T005;Zm00001d005030_T008;Zm00001d005030_T004;Zm00001d005030_T002;Zm00001d005030_T003;Zm00001d005030_T007;Zm00001d005030_T001;Zm00001d005030_T009;Zm00001d005030_T006	GO:0003723(RNA binding);GO:0003735(structural constituent of ribosome);GO:0005840(ribosome);GO:0006412(translation);GO:0022627(cytosolic small ribosomal subunit);GO:0022627(cytosolic small ribosomal subunit)	NA	NA	NA	40S ribosomal protein S4-3	protein_coding	0.0481752	0.121424	0.0668682	6.8085	8.74579	7.76927	0.0101386	-6.624	9.43484e-50	5.28227e-47	down	yes
Zm00001d035684	Zm00001d035684	Zm00001d035684_T001	GO:0004867(serine-type endopeptidase inhibitor activity);GO:0009611(response to wounding);GO:0010951(negative regulation of endopeptidase activity)	NA	NA	NA	Subtilisin-chymotrypsin inhibitor CI-1B%3B Subtilisin-chymotrypsin inhibitor CI-1B isoform 1%3B Subtilisin-chymotrypsin inhibitor CI-1B isoform 2	protein_coding	81.1605	68.3931	93.3028	0.0001	0.0001	0.0001	809521	19.6267	1.44797e-49	7.89888e-47	up	yes
Zm00001d052690	Zm00001d052690	Zm00001d052690_T001	GO:0016020(membrane);GO:0016021(integral component of membrane)	NA	NA	NA	UPF0481 protein	protein_coding	43.6548	28.5951	39.4118	0.146014	0.068474	0.035561	446.559	8.80271	5.87604e-49	3.12532e-46	up	yes
Zm00001d013635	Zm00001d013635	Zm00001d013635_T001	GO:0004553(hydrolase activity, hydrolyzing O-glycosyl compounds);GO:0005975(carbohydrate metabolic process);GO:0008152(metabolic process);GO:0016787(hydrolase activity);GO:0016798(hydrolase activity, acting on glycosyl bonds);GO:0046658(anchored component of plasma membrane)	NA	NA	NA	O-Glycosyl hydrolases family 17 protein	protein_coding	0.246289	0.211018	0.198476	17.9366	21.1184	20.6073	0.0109916	-6.50746	1.14734e-48	5.95358e-46	down	yes
Zm00001d028431	Zm00001d028431	Zm00001d028431_T001	GO:0000793(condensed chromosome);GO:0005634(nucleus);GO:0006281(DNA repair);GO:0007129(synapsis);GO:0031573(intra-S DNA damage checkpoint);GO:0036297(interstrand cross-link repair);GO:0070182(DNA polymerase binding);GO:1990918(double-strand break repair involved in meiotic recombination)	NA	NA	NA		protein_coding	0.039299	0.040477	0.0001	10.5697	13.482	14.9848	0.00204619	-8.93284	1.7695e-48	8.96336e-46	down	yes
Zm00001d026150	Zm00001d026150	Zm00001d026150_T001	NA	NA	NA	NA	Binding partner of ACD11 1	protein_coding	8.32902	15.0493	9.99924	0.0001	0.0001	0.0001	111258	16.7636	4.44261e-48	2.19806e-45	up	yes
Zm00001d002312	Zm00001d002312	Zm00001d002312_T002;Zm00001d002312_T004;Zm00001d002312_T001;Zm00001d002312_T003	GO:0000166(nucleotide binding);GO:0004672(protein kinase activity);GO:0004674(protein serine/threonine kinase activity);GO:0005524(ATP binding);GO:0005886(plasma membrane);GO:0006468(protein phosphorylation);GO:0016020(membrane);GO:0016021(integral component of membrane);GO:0016301(kinase activity);GO:0016310(phosphorylation);GO:0046777(protein autophosphorylation);GO:0046777(protein autophosphor…	NA	NA	NA	Leucine-rich repeat transmembrane protein kinase	protein_coding	6.57007	9.52737	6.15949	0.0001	0.0001	0.034162	647.719	9.33923	1.14938e-47	5.5575e-45	up	yes
Zm00001d047418	Zm00001d047418	Zm00001d047418_T002;Zm00001d047418_T001	GO:0004497(monooxygenase activity);GO:0005506(iron ion binding);GO:0016491(oxidoreductase activity);GO:0016705(oxidoreductase activity, acting on paired donors, with incorporation or reduction of molecular oxygen);GO:0020037(heme binding);GO:0046872(metal ion binding);GO:0055114(oxidation-reduction process);GO:0055114(oxidation-reduction process)	NA	NA	NA	Cytochrome P450 709B2	protein_coding	0.0738402	0.135912	0.0001	41.0695	28.8312	44.6297	0.00183228	-9.09214	1.98462e-47	9.32661e-45	down	yes
Zm00001d014868	Zm00001d014868	Zm00001d014868_T001	NA	NA	NA	NA		protein_coding	23.4859	19.9194	26.1506	0.0001	0.0001	0.0001	231853	17.8229	2.01656e-47	9.32661e-45	up	yes
Zm00001d040916	Zm00001d040916	Zm00001d040916_T001	NA	NA	NA	NA		protein_coding	0.0001	0.227761	0.0001	46.1841	49.0962	41.1872	0.00167044	-9.22555	7.91807e-47	3.58419e-44	down	yes
Zm00001d008509	Zm00001d008509	Zm00001d008509_T002;Zm00001d008509_T001	GO:0016020(membrane);GO:0016021(integral component of membrane);GO:0016307(phosphatidylinositol phosphate kinase activity);GO:0016746(transferase activity, transferring acyl groups);GO:0046488(phosphatidylinositol metabolic process);GO:0046854(phosphatidylinositol phosphorylation);GO:0046854(phosphatidylinositol phosphorylation)	NA	NA	NA		protein_coding	0.0001	0.0001	0.0001	12.0866	9.41182	9.74868	9.6009e-06	-16.6684	3.86517e-46	1.71315e-43	down	yes
Zm00001d041788	Zm00001d041788	Zm00001d041788_T001	GO:0031047(gene silencing by RNA)	NA	NA	NA	Protein SUPPRESSOR OF GENE SILENCING 3	protein_coding	43.8732	35.4826	31.5049	0.0001	0.100223	0.062144	682.358	9.41439	6.30861e-46	2.7391e-43	up	yes
Zm00001d001841	Zm00001d001841	Zm00001d001841_T001	GO:0003735(structural constituent of ribosome);GO:0005739(mitochondrion)	NA	NA	NA		protein_coding	0.0001	0.0001	0.0001	16.1024	13.6276	15.5801	6.62103e-06	-17.2045	7.17331e-46	3.05225e-43	down	yes
Zm00001d040679	Zm00001d040679	Zm00001d040679_T001	GO:0004672(protein kinase activity);GO:0004675(transmembrane receptor protein serine/threonine kinase activity);GO:0005524(ATP binding);GO:0005886(plasma membrane);GO:0006468(protein phosphorylation);GO:0007178(transmembrane receptor protein serine/threonine kinase signaling pathway);GO:0016301(kinase activity);GO:0016310(phosphorylation)	NA	NA	NA	Receptor-like cytosolic serine/threonine-protein kinase RBK1	protein_coding	0.0001	0.051889	0.0001	10.2279	14.7259	12.6963	0.0013835	-9.49746	7.73397e-46	3.22628e-43	down	yes
Zm00001d051713	Zm00001d051713	Zm00001d051713_T001	GO:0003777(microtubule motor activity);GO:0007018(microtubule-based movement)	NA	NA	NA		protein_coding	21.0375	22.3508	18.2319	0.0001	0.0001	0.073414	837.073	9.70921	1.15144e-44	4.71092e-42	up	yes
Zm00001d034421	Zm00001d034421	Zm00001d034421_T004;Zm00001d034421_T002;Zm00001d034421_T005;Zm00001d034421_T003;Zm00001d034421_T001	GO:0000166(nucleotide binding);GO:0004672(protein kinase activity);GO:0005524(ATP binding);GO:0005737(cytoplasm);GO:0005856(cytoskeleton);GO:0006468(protein phosphorylation);GO:0016301(kinase activity);GO:0016310(phosphorylation);GO:0016310(phosphorylation)	NA	NA	NA	Actin-7	protein_coding	4.10112	7.71337	7.75302	0.0001	0.0235942	0.0001	822.365	9.68364	4.94869e-44	1.98648e-41	up	yes
Zm00001d031042	Zm00001d031042	Zm00001d031042_T001	GO:0000793(condensed chromosome);GO:0005634(nucleus);GO:0006281(DNA repair);GO:0007129(synapsis);GO:0031573(intra-S DNA damage checkpoint);GO:0036297(interstrand cross-link repair);GO:0070182(DNA polymerase binding);GO:1990918(double-strand break repair involved in meiotic recombination)	NA	NA	NA		protein_coding	0.0001	0.017965	0.0001	8.07114	9.01046	10.0675	0.000669082	-10.5455	6.19513e-44	2.44077e-41	down	yes
Zm00001d002032	Zm00001d002032	Zm00001d002032_T046;Zm00001d002032_T045;Zm00001d002032_T044;Zm00001d002032_T042;Zm00001d002032_T041;Zm00001d002032_T026;Zm00001d002032_T014;Zm00001d002032_T001;Zm00001d002032_T011;Zm00001d002032_T033;Zm00001d002032_T031;Zm00001d002032_T005;Zm00001d002032_T015;Zm00001d002032_T030;Zm00001d002032_T025;Zm00001d002032_T009;Zm00001d002032_T023;Zm00001d002032_T013;Zm00001d002032_T010;Zm00001d002032_T018…	GO:0003676(nucleic acid binding);GO:0005515(protein binding);GO:0005634(nucleus);GO:0008270(zinc ion binding);GO:0016020(membrane);GO:0016021(integral component of membrane);GO:0016021(integral component of membrane)	NA	NA	NA		protein_coding	1.47157	1.27075	1.2665	0.0001	0.0001	0.0001	13362.7	13.7059	8.40613e-44	3.25165e-41	up	yes
Zm00001d019176	Zm00001d019176	Zm00001d019176_T001	GO:0003824(catalytic activity);GO:0005622(intracellular);GO:0005829(cytosol);GO:0016491(oxidoreductase activity);GO:0016831(carboxy-lyase activity);GO:0030976(thiamine pyrophosphate binding);GO:0045454(cell redox homeostasis);GO:0055114(oxidation-reduction process)	NA	NA	NA	Pyruvate decarboxylase 2	protein_coding	9.95019	8.29347	8.87681	0.0001	0.0001	0.0001	90401.6	16.4641	8.84236e-44	3.35931e-41	up	yes
Zm00001d048739	Zm00001d048739	Zm00001d048739_T001	GO:0000166(nucleotide binding);GO:0004672(protein kinase activity);GO:0004674(protein serine/threonine kinase activity);GO:0004675(transmembrane receptor protein serine/threonine kinase activity);GO:0005524(ATP binding);GO:0005886(plasma membrane);GO:0006468(protein phosphorylation);GO:0007178(transmembrane receptor protein serine/threonine kinase signaling pathway);GO:0016301(kinase activity);GO…	NA	NA	NA	Protein kinase superfamily protein	protein_coding	0.0001	0.0001	0.0001	8.56562	7.74916	6.57232	1.31078e-05	-16.2192	2.13693e-43	7.976e-41	down	yes
Zm00001d029096	Zm00001d029096	Zm00001d029096_T012;Zm00001d029096_T007;Zm00001d029096_T011;Zm00001d029096_T008;Zm00001d029096_T006;Zm00001d029096_T002;Zm00001d029096_T003	GO:0006281(DNA repair);GO:0070182(DNA polymerase binding);GO:0070182(DNA polymerase binding)	NA	K10895	NA		protein_coding	0.0728994	0.0758002	0.0344274	6.47646	7.37744	11.3498	0.00726589	-7.10465	2.74689e-43	9.97569e-41	down	yes
Zm00001d004362	Zm00001d004362	Zm00001d004362_T001	NA	NA	NA	NA		protein_coding	0.0001	0.107536	0.0001	33.7899	42.9182	46.104	0.000877243	-10.1547	2.76647e-43	9.97569e-41	down	yes
Zm00001d045355	Zm00001d045355	Zm00001d045355_T001	NA	NA	NA	NA		protein_coding	0.100848	0.074031	0.0001	25.8508	22.9285	25.7202	0.00234873	-8.73391	3.4556e-43	1.2253e-40	down	yes
Zm00001d033187	Zm00001d033187	Zm00001d033187_T002;Zm00001d033187_T003;Zm00001d033187_T001	GO:0006629(lipid metabolic process);GO:0008081(phosphoric diester hydrolase activity);GO:0008889(glycerophosphodiester phosphodiesterase activity);GO:0008889(glycerophosphodiester phosphodiesterase activity)	00564(Glycerophospholipid metabolism);00564(Glycerophospholipid metabolism)	K01126	EC:3.1.4.46	Glycerophosphoryl diester phosphodiesterase	protein_coding	17.4079	44.3997	55.8405	0.342242	0.251374	0.195971	148.999	7.21916	3.89732e-43	1.35927e-40	up	yes
Zm00001d005941	Zm00001d005941	Zm00001d005941_T002;Zm00001d005941_T001;Zm00001d005941_T003	NA	NA	NA	NA		protein_coding	0.0001	0.0001	0.0001	9.78549	9.60477	11.0569	9.85314e-06	-16.631	3.99629e-43	1.37131e-40	down	yes
Zm00001d005195	Zm00001d005195	Zm00001d005195_T015;Zm00001d005195_T008;Zm00001d005195_T014;Zm00001d005195_T013;Zm00001d005195_T006;Zm00001d005195_T009;Zm00001d005195_T004;Zm00001d005195_T003;Zm00001d005195_T011;Zm00001d005195_T005;Zm00001d005195_T010;Zm00001d005195_T001;Zm00001d005195_T002;Zm00001d005195_T007;Zm00001d005195_T012	GO:0016567(protein ubiquitination);GO:0061630(ubiquitin protein ligase activity);GO:0061630(ubiquitin protein ligase activity)	NA	NA	NA	RING/U-box superfamily protein	protein_coding	0.0001	0.0001	0.0001	1.95605	2.40131	3.26423	3.93618e-05	-14.6328	4.99765e-43	1.6877e-40	down	yes
Zm00001d028140	Zm00001d028140	Zm00001d028140_T005;Zm00001d028140_T001;Zm00001d028140_T007;Zm00001d028140_T004;Zm00001d028140_T016;Zm00001d028140_T003;Zm00001d028140_T002;Zm00001d028140_T008;Zm00001d028140_T013;Zm00001d028140_T011;Zm00001d028140_T017;Zm00001d028140_T010;Zm00001d028140_T015;Zm00001d028140_T009;Zm00001d028140_T012;Zm00001d028140_T006;Zm00001d028140_T014	GO:0005654(nucleoplasm);GO:0005730(nucleolus);GO:0009058(biosynthetic process);GO:0016844(strictosidine synthase activity);GO:0030690(Noc1p-Noc2p complex);GO:0030691(Noc2p-Noc3p complex);GO:0042273(ribosomal large subunit biogenesis);GO:0042273(ribosomal large subunit biogenesis)	NA	NA	NA	Noc2p family	protein_coding	0.0001	0.0134619	0.0001	3.18886	3.01459	3.2857	0.00143973	-9.43998	6.11102e-43	2.03144e-40	down	yes
Zm00001d041772	glutathione transferase18	Zm00001d041772_T003;Zm00001d041772_T001;Zm00001d041772_T002	GO:0003824(catalytic activity);GO:0004364(glutathione transferase activity);GO:0005515(protein binding);GO:0005737(cytoplasm);GO:0006559(L-phenylalanine catabolic process);GO:0006749(glutathione metabolic process);GO:0009072(aromatic amino acid family metabolic process);GO:0016034(maleylacetoacetate isomerase activity);GO:0016740(transferase activity);GO:0016740(transferase activity)	NA	NA	NA	glutathione transferase18	protein_coding	19.2044	30.1178	36.8605	0.407328	0.519741	0.281412	71.3149	6.15613	1.50915e-42	4.93957e-40	up	yes
Zm00001d040368	Zm00001d040368	Zm00001d040368_T012;Zm00001d040368_T005;Zm00001d040368_T011;Zm00001d040368_T007;Zm00001d040368_T001;Zm00001d040368_T009;Zm00001d040368_T006;Zm00001d040368_T008;Zm00001d040368_T003;Zm00001d040368_T010;Zm00001d040368_T002;Zm00001d040368_T004	GO:0004672(protein kinase activity);GO:0004675(transmembrane receptor protein serine/threonine kinase activity);GO:0005524(ATP binding);GO:0005886(plasma membrane);GO:0006468(protein phosphorylation);GO:0007178(transmembrane receptor protein serine/threonine kinase signaling pathway);GO:0016020(membrane);GO:0016021(integral component of membrane);GO:0016301(kinase activity);GO:0016310(phosphoryla…	NA	NA	NA		protein_coding	6.2621	7.12707	6.76401	0.0494459	0.0001	0.0246079	271.775	8.08627	2.49126e-42	8.03053e-40	up	yes
Zm00001d023759	Zm00001d023759	Zm00001d023759_T001	GO:0003824(catalytic activity);GO:0016491(oxidoreductase activity);GO:0055114(oxidation-reduction process)	NA	NA	NA	Peroxisomal (S)-2-hydroxy-acid oxidase GLO4	protein_coding	0.0001	0.0001	0.019252	8.61845	8.97681	13.2869	0.000629878	-10.6326	2.73492e-42	8.6844e-40	down	yes
Zm00001d010627	Zm00001d010627	Zm00001d010627_T001	NA	NA	NA	NA	Protein LURP-one-related 8	protein_coding	12.6395	19.7316	24.7808	0.0001	0.0001	0.0001	190506	17.5395	4.11353e-42	1.28699e-39	up	yes
Zm00001d038383	Zm00001d038383	Zm00001d038383_T007;Zm00001d038383_T008;Zm00001d038383_T004;Zm00001d038383_T001;Zm00001d038383_T006;Zm00001d038383_T005;Zm00001d038383_T002;Zm00001d038383_T003	GO:0000166(nucleotide binding);GO:0003774(motor activity);GO:0003777(microtubule motor activity);GO:0005506(iron ion binding);GO:0005524(ATP binding);GO:0005871(kinesin complex);GO:0005874(microtubule);GO:0007018(microtubule-based movement);GO:0008017(microtubule binding);GO:0008574(ATP-dependent microtubule motor activity, plus-end-directed);GO:0016705(oxidoreductase activity, acting on paired d…	NA	NA	NA		protein_coding	0.0001	0.0001	0.0001	2.63944	3.02898	2.10612	3.85875e-05	-14.6615	5.27577e-42	1.62669e-39	down	yes
Zm00001d016122	Zm00001d016122	Zm00001d016122_T001;Zm00001d016122_T003;Zm00001d016122_T002	NA	NA	NA	NA	CONTAINS InterPro DOMAIN/s: Kinetochore protein Ndc80 (InterPro:IPR005550); Has 24780 Blast hits to 15608 proteins in 1321 species: Archae - 545; Bacteria - 2969; Metazoa - 12597; Fungi - 2181; Plants - 1581; Viruses - 39; Other Eukaryotes - 4868 (s /.../ NCBI BLink).	protein_coding	3.06584	4.32949	3.6689	0.0001	0.0001	0.0001	36880.8	15.1706	1.30378e-41	3.96255e-39	up	yes
Zm00001d023863	Zm00001d023863	Zm00001d023863_T001	GO:0004746(riboflavin synthase activity);GO:0009231(riboflavin biosynthetic process)	00740(Riboflavin metabolism)	K00793	EC:2.5.1.9	Riboflavin synthase alpha chain	protein_coding	23.2415	27.8184	25.1711	0.192096	0.0001	0.01034	376.382	8.55605	1.56639e-41	4.69367e-39	up	yes
Zm00001d031819	Zm00001d031819	Zm00001d031819_T001	GO:0005737(cytoplasm);GO:0046872(metal ion binding)	NA	NA	NA	zinc finger (MYND type) family protein / programmed cell death 2 C-terminal domain-containing protein	protein_coding	0.706563	1.15672	0.479337	41.2573	48.7716	48.1896	0.0169487	-5.88268	4.31872e-41	1.27612e-38	down	yes
Zm00001d015497	Zm00001d015497	Zm00001d015497_T004;Zm00001d015497_T011;Zm00001d015497_T005;Zm00001d015497_T008;Zm00001d015497_T010;Zm00001d015497_T002;Zm00001d015497_T012;Zm00001d015497_T001;Zm00001d015497_T009;Zm00001d015497_T006;Zm00001d015497_T003;Zm00001d015497_T007	GO:0003994(aconitate hydratase activity);GO:0005739(mitochondrion);GO:0005829(cytosol);GO:0006099(tricarboxylic acid cycle);GO:0006101(citrate metabolic process);GO:0051539(4 iron, 4 sulfur cluster binding);GO:0051539(4 iron, 4 sulfur cluster binding)	NA	NA	NA	Aconitate hydratase 3 mitochondrial	protein_coding	3.7475	4.75385	4.62311	0.0001	0.0001	0.0248485	523.961	9.03332	5.5133e-41	1.60679e-38	up	yes
Zm00001d019822	Zm00001d019822	Zm00001d019822_T001	GO:0005737(cytoplasm);GO:0031931(TORC1 complex);GO:0031932(TORC2 complex);GO:0032006(regulation of TOR signaling);GO:0070209(ASTRA complex)	NA	NA	NA	ARM repeat superfamily protein	protein_coding	0.0001	0.0001	0.0001	5.22935	6.18188	6.56522	1.66885e-05	-15.8708	3.6194e-40	1.04058e-37	down	yes
Zm00001d012132	Zm00001d012132	Zm00001d012132_T001	NA	NA	NA	NA		protein_coding	0.0001	0.0001	0.060441	14.5452	14.5718	18.1234	0.00128367	-9.60551	4.83774e-40	1.3723e-37	down	yes
Zm00001d032812	Zm00001d032812	Zm00001d032812_T001	GO:0004252(serine-type endopeptidase activity);GO:0006508(proteolysis);GO:0008233(peptidase activity)	NA	NA	NA	Subtilisin-like protease SBT2.6	protein_coding	0.0001	0.0001	0.0001	7.16768	9.52058	9.28104	1.15521e-05	-16.4015	1.09249e-39	3.05825e-37	down	yes
Zm00001d008133	Zm00001d008133	Zm00001d008133_T001	NA	NA	NA	NA		lincRNA	30.0425	21.5176	30.2515	0.0001	0.0001	0.0001	272705	18.057	1.57319e-39	4.34672e-37	up	yes
Zm00001d005779	Zm00001d005779	Zm00001d005779_T179;Zm00001d005779_T199;Zm00001d005779_T201;Zm00001d005779_T002;Zm00001d005779_T119;Zm00001d005779_T157;Zm00001d005779_T088;Zm00001d005779_T197;Zm00001d005779_T129;Zm00001d005779_T016;Zm00001d005779_T198;Zm00001d005779_T122;Zm00001d005779_T095;Zm00001d005779_T187;Zm00001d005779_T077;Zm00001d005779_T041;Zm00001d005779_T071;Zm00001d005779_T118;Zm00001d005779_T010;Zm00001d005779_T008…	GO:0000160(phosphorelay signal transduction system);GO:0004427(inorganic diphosphatase activity);GO:0005622(intracellular);GO:0006355(regulation of transcription, DNA-templated);GO:0009678(pyrophosphate hydrolysis-driven proton transmembrane transporter activity);GO:0016020(membrane);GO:0016021(integral component of membrane);GO:0030247(polysaccharide binding);GO:0042393(histone binding);GO:19026…	NA	NA	NA	ubiquitin carrier protein 7	protein_coding	2.13115	2.63476	2.48113	0.012622	0.0001	0.0189511	228.807	7.83799	4.02919e-39	1.09899e-36	up	yes
Zm00001d012806	Zm00001d012806	Zm00001d012806_T002;Zm00001d012806_T003;Zm00001d012806_T001	NA	NA	NA	NA	10A19I.15	protein_coding	0.0001	0.0001	0.0001	5.3963	5.4476	5.69183	1.81425e-05	-15.7503	7.26706e-39	1.95705e-36	down	yes
Zm00001d003312	Zm00001d003312	Zm00001d003312_T004;Zm00001d003312_T003;Zm00001d003312_T005;Zm00001d003312_T002;Zm00001d003312_T001	GO:0003824(catalytic activity);GO:0003988(acetyl-CoA C-acyltransferase activity);GO:0005777(peroxisome);GO:0006635(fatty acid beta-oxidation);GO:0010124(phenylacetate catabolic process);GO:0010124(phenylacetate catabolic process)	NA	NA	NA	3-ketoacyl-CoA thiolase 2 peroxisomal	protein_coding	0.0001	0.0001	0.0371662	8.42718	7.68643	6.94514	0.00162048	-9.26937	1.1845e-38	3.15003e-36	down	yes
Zm00001d013101	Zm00001d013101	Zm00001d013101_T003;Zm00001d013101_T001;Zm00001d013101_T002;Zm00001d013101_T005;Zm00001d013101_T004	GO:0016020(membrane);GO:0016798(hydrolase activity, acting on glycosyl bonds);GO:0016798(hydrolase activity, acting on glycosyl bonds)	NA	NA	NA		protein_coding	0.0001	0.0001	0.0001	3.53541	2.88373	3.12038	3.14481e-05	-14.9567	1.25479e-38	3.29576e-36	down	yes
Zm00001d035214	GRMZM2G055238	Zm00001d035214_T001	GO:0005274(allantoin:proton symporter activity);GO:0015505(uracil:cation symporter activity);GO:0015720(allantoin transport);GO:0016020(membrane);GO:0016021(integral component of membrane);GO:0022857(transmembrane transporter activity);GO:0055085(transmembrane transport);GO:0071705(nitrogen compound transport);GO:1903791(uracil transmembrane transport)	NA	NA	NA	Ureide permease 5	protein_coding	11.6209	6.44609	9.46078	0.0001	0.0001	0.0001	91759.1	16.4856	1.87579e-38	4.86676e-36	up	yes
Zm00001d029741	Zm00001d029741	Zm00001d029741_T001	GO:0005737(cytoplasm);GO:0005768(endosome);GO:0005794(Golgi apparatus);GO:0005802(trans-Golgi network);GO:0008168(methyltransferase activity);GO:0016020(membrane);GO:0016021(integral component of membrane);GO:0016740(transferase activity);GO:0032259(methylation)	NA	NA	NA		protein_coding	0.0001	0.141052	0.0001	24.3949	23.4659	24.809	0.00194375	-9.00694	2.36468e-38	6.06126e-36	down	yes
Zm00001d037427	Zm00001d037427	Zm00001d037427_T003;Zm00001d037427_T005;Zm00001d037427_T004;Zm00001d037427_T001;Zm00001d037427_T002	GO:0003723(RNA binding);GO:0003735(structural constituent of ribosome);GO:0005840(ribosome);GO:0006412(translation);GO:0022627(cytosolic small ribosomal subunit);GO:0022627(cytosolic small ribosomal subunit)	03010(Ribosome);03010(Ribosome)	K02987	NA	40S ribosomal protein S4-3	protein_coding	15.1268	16.7096	15.3128	0.420798	0.307773	0.463831	39.5413	5.30529	1.24389e-37	3.15045e-35	up	yes
Zm00001d041746	Zm00001d041746	Zm00001d041746_T001	NA	NA	NA	NA	Pinoresinol reductase 2	protein_coding	0.0001	0.0001	0.091822	14.2213	13.5773	14.7226	0.00216415	-8.85199	1.26854e-37	3.17508e-35	down	yes
Zm00001d017387	Zm00001d017387	Zm00001d017387_T008;Zm00001d017387_T014;Zm00001d017387_T009;Zm00001d017387_T010;Zm00001d017387_T017;Zm00001d017387_T016;Zm00001d017387_T002;Zm00001d017387_T013;Zm00001d017387_T006;Zm00001d017387_T005;Zm00001d017387_T011;Zm00001d017387_T007;Zm00001d017387_T003;Zm00001d017387_T015;Zm00001d017387_T004;Zm00001d017387_T012;Zm00001d017387_T001	GO:0007131(reciprocal meiotic recombination);GO:0016020(membrane);GO:0016021(integral component of membrane);GO:0016491(oxidoreductase activity);GO:0046872(metal ion binding);GO:0055114(oxidation-reduction process);GO:0055114(oxidation-reduction process)	NA	K08360	EC:7.2.1.3	shortage in chiasmata 1	protein_coding	0.0409009	0.0399439	0.0280281	2.08788	2.35219	2.29659	0.0161613	-5.95132	1.32854e-37	3.28658e-35	down	yes
Zm00001d042092	Zm00001d042092	Zm00001d042092_T002;Zm00001d042092_T001	GO:0005622(intracellular);GO:0030170(pyridoxal phosphate binding);GO:0030170(pyridoxal phosphate binding)	NA	NA	NA	Proline synthase co-transcribed bacterial homolog protein	protein_coding	17.8235	10.0544	10.6944	0.0001	0.0001	0.0001	128574	16.9722	2.61005e-37	6.38263e-35	up	yes
Zm00001d016322	Zm00001d016322	Zm00001d016322_T001	NA	NA	NA	NA		protein_coding	0.713527	0.654427	1.28175	51.798	47.1885	67.802	0.0158866	-5.97604	5.4714e-37	1.32277e-34	down	yes
Zm00001d043484	Zm00001d043484	Zm00001d043484_T024;Zm00001d043484_T009;Zm00001d043484_T002;Zm00001d043484_T014;Zm00001d043484_T019;Zm00001d043484_T015;Zm00001d043484_T018;Zm00001d043484_T022;Zm00001d043484_T027;Zm00001d043484_T005;Zm00001d043484_T025;Zm00001d043484_T004;Zm00001d043484_T017;Zm00001d043484_T021;Zm00001d043484_T008;Zm00001d043484_T001;Zm00001d043484_T011;Zm00001d043484_T012;Zm00001d043484_T003;Zm00001d043484_T016…	GO:0016020(membrane);GO:0016021(integral component of membrane);GO:0016021(integral component of membrane)	NA	NA	NA		protein_coding	0.0001	0.0001	0.0001	3.73337	1.96293	1.50954	4.16329e-05	-14.5519	9.42805e-37	2.25373e-34	down	yes
Zm00001d034460	tryptophan synthase A homolog1	Zm00001d034460_T010;Zm00001d034460_T007;Zm00001d034460_T018;Zm00001d034460_T011;Zm00001d034460_T009;Zm00001d034460_T017;Zm00001d034460_T001;Zm00001d034460_T004;Zm00001d034460_T019;Zm00001d034460_T020;Zm00001d034460_T012;Zm00001d034460_T014;Zm00001d034460_T005;Zm00001d034460_T003;Zm00001d034460_T002;Zm00001d034460_T008;Zm00001d034460_T013;Zm00001d034460_T016;Zm00001d034460_T015;Zm00001d034460_T021…	GO:0000162(tryptophan biosynthetic process);GO:0003824(catalytic activity);GO:0004834(tryptophan synthase activity);GO:0005829(cytosol);GO:0006568(tryptophan metabolic process);GO:0009507(chloroplast);GO:0016829(lyase activity);GO:0016829(lyase activity)	00260(Glycine, serine and threonine metabolism);00400(Phenylalanine, tyrosine and tryptophan biosynthesis);00400(Phenylalanine, tyrosine and tryptophan biosynthesis)	K01695	EC:4.2.1.20	tryptophan synthase A homolog1	protein_coding	9.19192	8.11121	7.74519	0.198209	0.235877	0.142521	43.4409	5.44098	9.8577e-37	2.33025e-34	up	yes
Zm00001d016679	Zm00001d016679	Zm00001d016679_T010;Zm00001d016679_T008;Zm00001d016679_T009;Zm00001d016679_T002;Zm00001d016679_T012;Zm00001d016679_T005;Zm00001d016679_T007;Zm00001d016679_T003;Zm00001d016679_T004;Zm00001d016679_T001;Zm00001d016679_T011;Zm00001d016679_T006	GO:0016020(membrane);GO:0016021(integral component of membrane);GO:0016021(integral component of membrane)	NA	NA	NA		protein_coding	0.0001	0.0001	0.0001	1.23968	1.26726	1.96892	6.70262e-05	-13.8649	2.33802e-36	5.46609e-34	down	yes
Zm00001d024317	Zm00001d024317	Zm00001d024317_T001	GO:0016740(transferase activity);GO:0016747(transferase activity, transferring acyl groups other than amino-acyl groups)	NA	NA	NA	Transferase	protein_coding	3.84682	13.3959	10.9829	0.0001	0.0001	0.0001	94085.4	16.5217	4.31264e-36	9.97298e-34	up	yes
Zm00001d029913	beta expansin6	Zm00001d029913_T001	GO:0005576(extracellular region);GO:0019953(sexual reproduction)	NA	NA	NA	Expansin-B4	protein_coding	73.7487	80.5834	79.447	0.782644	1.73027	1.56705	57.2993	5.84045	6.05766e-36	1.38577e-33	up	yes
Zm00001d042060	Zm00001d042060	Zm00001d042060_T001	GO:0003677(DNA binding);GO:0003680(AT DNA binding);GO:0003700(DNA-binding transcription factor activity);GO:0005634(nucleus);GO:0006351(transcription, DNA-templated);GO:0006355(regulation of transcription, DNA-templated)	NA	NA	NA	AT-hook motif nuclear-localized protein 17	protein_coding	0.233873	0.436745	0.0001	61.0463	89.9866	111.925	0.00255066	-8.61491	7.30114e-36	1.65246e-33	down	yes
Zm00001d030034	Zm00001d030034	Zm00001d030034_T001;Zm00001d030034_T002;Zm00001d030034_T003	GO:0002098(tRNA wobble uridine modification);GO:0005739(mitochondrion);GO:0005829(cytosol);GO:0008033(tRNA processing);GO:0030488(tRNA methylation);GO:0050660(flavin adenine dinucleotide binding);GO:0070899(mitochondrial tRNA wobble uridine modification);GO:0070899(mitochondrial tRNA wobble uridine modification)	NA	NA	NA	glucose-inhibited division family A protein	protein_coding	4.8918	7.47711	6.01642	0.0001	0.0001	0.0001	61284.4	15.9032	8.9003e-36	1.9932e-33	up	yes
Zm00001d012982	Zm00001d012982	Zm00001d012982_T001	GO:0003824(catalytic activity);GO:0016491(oxidoreductase activity);GO:0016616(oxidoreductase activity, acting on the CH-OH group of donors, NAD or NADP as acceptor);GO:0055114(oxidation-reduction process)	NA	NA	NA	NAD(P)-binding Rossmann-fold superfamily protein	protein_coding	28.5121	20.5137	25.9476	0.038402	0.0001	0.151678	394.224	8.62287	1.45926e-35	3.23394e-33	up	yes
Zm00001d006861	Zm00001d006861	Zm00001d006861_T015;Zm00001d006861_T035;Zm00001d006861_T028;Zm00001d006861_T008;Zm00001d006861_T002;Zm00001d006861_T007;Zm00001d006861_T006;Zm00001d006861_T010;Zm00001d006861_T003;Zm00001d006861_T030;Zm00001d006861_T005;Zm00001d006861_T042;Zm00001d006861_T019;Zm00001d006861_T038;Zm00001d006861_T034;Zm00001d006861_T039;Zm00001d006861_T032;Zm00001d006861_T012;Zm00001d006861_T022;Zm00001d006861_T009…	GO:0007142(male meiosis II);GO:0016020(membrane);GO:0016021(integral component of membrane);GO:0016021(integral component of membrane)	NA	NA	NA		protein_coding	4.98364	4.62802	3.38562	0.110395	0.10063	0.101424	41.5981	5.37845	4.28753e-35	9.40383e-33	up	yes
Zm00001d050083	Zm00001d050083	Zm00001d050083_T002;Zm00001d050083_T001;Zm00001d050083_T003	NA	NA	NA	NA		protein_coding	0.090121	0.0001	0.0001	11.8971	15.1561	18.0916	0.0020007	-8.96528	5.88472e-35	1.27752e-32	down	yes
Zm00001d041649	Zm00001d041649	Zm00001d041649_T006;Zm00001d041649_T008;Zm00001d041649_T001;Zm00001d041649_T002;Zm00001d041649_T005;Zm00001d041649_T009;Zm00001d041649_T004;Zm00001d041649_T007;Zm00001d041649_T010;Zm00001d041649_T011;Zm00001d041649_T003	GO:0016020(membrane);GO:0016021(integral component of membrane);GO:0016021(integral component of membrane)	NA	K23222	EC:3.1.-.-		protein_coding	3.17899	3.43307	2.46117	0.0001	0.0001	0.0001	30244.1	14.8844	6.53724e-35	1.40485e-32	up	yes
Zm00001d052656	Zm00001d052656	Zm00001d052656_T006;Zm00001d052656_T011;Zm00001d052656_T005;Zm00001d052656_T001;Zm00001d052656_T009;Zm00001d052656_T002;Zm00001d052656_T007;Zm00001d052656_T015;Zm00001d052656_T013;Zm00001d052656_T008;Zm00001d052656_T010;Zm00001d052656_T003;Zm00001d052656_T004;Zm00001d052656_T014;Zm00001d052656_T012	GO:0004072(aspartate kinase activity);GO:0008652(cellular amino acid biosynthetic process);GO:0016310(phosphorylation);GO:0016310(phosphorylation)	NA	NA	NA		protein_coding	0.0412011	0.018171	0.0001	4.15989	6.38428	6.38488	0.00351302	-8.15307	8.94749e-35	1.90358e-32	down	yes
Zm00001d044502	Zm00001d044502	Zm00001d044502_T002;Zm00001d044502_T001	GO:0002181(cytoplasmic translation);GO:0005515(protein binding);GO:0005634(nucleus);GO:0005844(polysome);GO:0006351(transcription, DNA-templated);GO:0009734(auxin-activated signaling pathway);GO:0009734(auxin-activated signaling pathway)	NA	NA	NA	Ubiquitin-conjugating enzyme family protein	protein_coding	0.0001	0.0001	0.0001	7.16128	7.18836	6.5943	1.4324e-05	-16.0912	9.06158e-35	1.90876e-32	down	yes
Zm00001d032509	Zm00001d032509	Zm00001d032509_T001	GO:0017137(Rab GTPase binding)	NA	NA	NA	Transducin/WD40 repeat-like superfamily protein	protein_coding	0.0001	0.317072	0.193001	27.6595	31.3727	36.2044	0.0053569	-7.54439	1.86829e-34	3.89684e-32	down	yes
Zm00001d002937	Zm00001d002937	Zm00001d002937_T035;Zm00001d002937_T021;Zm00001d002937_T003;Zm00001d002937_T034;Zm00001d002937_T033;Zm00001d002937_T014;Zm00001d002937_T023;Zm00001d002937_T005;Zm00001d002937_T019;Zm00001d002937_T004;Zm00001d002937_T036;Zm00001d002937_T007;Zm00001d002937_T026;Zm00001d002937_T025;Zm00001d002937_T002;Zm00001d002937_T010;Zm00001d002937_T029;Zm00001d002937_T012;Zm00001d002937_T017;Zm00001d002937_T009…	GO:0000166(nucleotide binding);GO:0003774(motor activity);GO:0003777(microtubule motor activity);GO:0004497(monooxygenase activity);GO:0005506(iron ion binding);GO:0005524(ATP binding);GO:0007018(microtubule-based movement);GO:0008017(microtubule binding);GO:0016020(membrane);GO:0016021(integral component of membrane);GO:0016705(oxidoreductase activity, acting on paired donors, with incorporation…	NA	NA	NA	cytochrome P450 family 72 subfamily A polypeptide 8	protein_coding	0.0001	0.0230364	0.0001	3.16372	5.06206	2.1972	0.00222934	-8.80917	2.09538e-34	4.32808e-32	down	yes
Zm00001d044954	Zm00001d044954	Zm00001d044954_T001	GO:0016491(oxidoreductase activity);GO:0046872(metal ion binding);GO:0051213(dioxygenase activity);GO:0055114(oxidation-reduction process)	NA	NA	NA	Probable 2-oxoacid dependent dioxygenase	protein_coding	67.0252	68.9412	81.3557	1.51322	0.413483	0.797152	79.7849	6.31804	2.72376e-34	5.57193e-32	up	yes
Zm00001d011094	Zm00001d011094	Zm00001d011094_T001;Zm00001d011094_T002	NA	NA	NA	NA		protein_coding	10.775	8.48096	9.17311	0.0001	0.0001	0.0001	94763.7	16.532	7.17648e-34	1.45409e-31	up	yes
Zm00001d050062	Zm00001d050062	Zm00001d050062_T002	NA	NA	NA	NA		protein_coding	2.60346	2.66895	2.81117	0.0001	0.0001	0.0001	26945.3	14.7177	1.58562e-33	3.18246e-31	up	yes
Zm00001d004506	Zm00001d004506	Zm00001d004506_T001	GO:0004497(monooxygenase activity);GO:0005506(iron ion binding);GO:0016020(membrane);GO:0016491(oxidoreductase activity);GO:0016705(oxidoreductase activity, acting on paired donors, with incorporation or reduction of molecular oxygen);GO:0016709(oxidoreductase activity, acting on paired donors, with incorporation or reduction of molecular oxygen, NAD(P)H as one donor, and incorporation of one ato…	NA	K00512	1.14.14.32;EC:1.14.14.19	Cytochrome P450 71D7	protein_coding	0.245075	0.06705	0.10213	26.4572	18.2179	40.4012	0.00486922	-7.68209	1.76928e-33	3.51789e-31	down	yes
Zm00001d018096	Zm00001d018096	Zm00001d018096_T001	GO:0003735(structural constituent of ribosome);GO:0005840(ribosome);GO:0006412(translation);GO:0009507(chloroplast)	NA	NA	NA	50S ribosomal protein L29	protein_coding	0.58518	1.19173	0.852166	25.2983	27.3391	26.5706	0.0331921	-4.91302	1.84085e-33	3.62631e-31	down	yes
Zm00001d026386	Zm00001d026386	Zm00001d026386_T008;Zm00001d026386_T005;Zm00001d026386_T007;Zm00001d026386_T006;Zm00001d026386_T002;Zm00001d026386_T004;Zm00001d026386_T009;Zm00001d026386_T001;Zm00001d026386_T003	GO:0005739(mitochondrion);GO:0006744(ubiquinone biosynthetic process);GO:0008168(methyltransferase activity);GO:0016020(membrane);GO:0016021(integral component of membrane);GO:0032259(methylation);GO:0032259(methylation)	NA	NA	NA	2-methoxy-6-polyprenyl-14-benzoquinol methylase mitochondrial	protein_coding	4.77844	5.92153	4.81027	0.0542094	0.0175764	0.0937834	93.6783	6.54964	3.44206e-33	6.71832e-31	up	yes
Zm00001d007424	Zm00001d007424	Zm00001d007424_T006;Zm00001d007424_T007;Zm00001d007424_T002;Zm00001d007424_T005;Zm00001d007424_T004;Zm00001d007424_T001;Zm00001d007424_T003	GO:0003824(catalytic activity);GO:0004758(serine C-palmitoyltransferase activity);GO:0005783(endoplasmic reticulum);GO:0009058(biosynthetic process);GO:0030170(pyridoxal phosphate binding);GO:0046512(sphingosine biosynthetic process);GO:0046513(ceramide biosynthetic process);GO:0046513(ceramide biosynthetic process)	NA	NA	NA	Long chain base biosynthesis protein 1	protein_coding	0.275681	0.233885	0.25605	9.61116	14.4099	20.9587	0.0170213	-5.87651	4.77027e-33	9.22614e-31	down	yes
Zm00001d037393	Zm00001d037393	Zm00001d037393_T006;Zm00001d037393_T014;Zm00001d037393_T025;Zm00001d037393_T003;Zm00001d037393_T021;Zm00001d037393_T028;Zm00001d037393_T023;Zm00001d037393_T016;Zm00001d037393_T019;Zm00001d037393_T015;Zm00001d037393_T017;Zm00001d037393_T013;Zm00001d037393_T002;Zm00001d037393_T005;Zm00001d037393_T010;Zm00001d037393_T009;Zm00001d037393_T007;Zm00001d037393_T012;Zm00001d037393_T022;Zm00001d037393_T001…	GO:0016020(membrane);GO:0016021(integral component of membrane);GO:0016021(integral component of membrane)	NA	NA	NA		protein_coding	0.786101	1.14229	1.06878	0.0001	0.0001	0.0001	9990.59	13.2864	6.62568e-33	1.26992e-30	up	yes
Zm00001d034208	Zm00001d034208	Zm00001d034208_T001	GO:0000145(exocyst);GO:0006887(exocytosis);GO:0006893(Golgi to plasma membrane transport);GO:0006904(vesicle docking involved in exocytosis);GO:0016020(membrane)	NA	NA	NA	Exocyst complex component SEC15A	protein_coding	4.42077	6.08974	4.20694	0.0001	0.0001	0.0001	49058.2	15.5822	8.11542e-33	1.54157e-30	up	yes
Zm00001d047942	Zm00001d047942	Zm00001d047942_T001;Zm00001d047942_T002	GO:0003779(actin binding);GO:0005737(cytoplasm);GO:0015629(actin cytoskeleton);GO:0030042(actin filament depolymerization);GO:0051015(actin filament binding);GO:0051017(actin filament bundle assembly);GO:0051017(actin filament bundle assembly)	NA	K05765	NA	Actin-depolymerizing factor 5	protein_coding	10.0348	12.965	12.1194	0.407271	0.277046	0.150642	42.061	5.39441	1.96082e-32	3.69171e-30	up	yes
Zm00001d010587	Zm00001d010587	Zm00001d010587_T001	GO:0000836(Hrd1p ubiquitin ligase complex);GO:0006511(ubiquitin-dependent protein catabolic process);GO:0016020(membrane);GO:0016021(integral component of membrane);GO:0030433(ubiquitin-dependent ERAD pathway);GO:0030968(endoplasmic reticulum unfolded protein response);GO:0030970(retrograde protein transport, ER to cytosol);GO:0036513(Derlin-1 retrotranslocation complex);GO:0051082(unfolded prote…	NA	NA	NA	RING-H2 finger protein ATL66	protein_coding	25.0425	18.0763	30.6162	0.0001	0.0001	0.120482	610.986	9.255	2.4196e-32	4.51552e-30	up	yes
Zm00001d031612	Zm00001d031612	Zm00001d031612_T001	NA	NA	NA	NA	Binding partner of ACD11 1	protein_coding	6.96556	14.4869	9.22876	0.0001	0.0001	0.0001	102271	16.642	3.57976e-32	6.62255e-30	up	yes
Zm00001d043254	Zm00001d043254	Zm00001d043254_T003;Zm00001d043254_T001;Zm00001d043254_T002	NA	NA	NA	NA		protein_coding	0.0001	0.0001	0.0001	7.9725	6.66499	5.69688	1.47533e-05	-16.0486	5.42297e-32	9.94601e-30	down	yes
Zm00001d007405	Zm00001d007405	Zm00001d007405_T003;Zm00001d007405_T002;Zm00001d007405_T001	NA	NA	NA	NA		protein_coding	0.0001	0.0001	0.0001	5.27818	4.09264	4.93206	2.09748e-05	-15.541	8.99471e-32	1.63558e-29	down	yes
Zm00001d027606	Zm00001d027606	Zm00001d027606_T001	GO:0016020(membrane);GO:0016021(integral component of membrane)	NA	NA	NA	OSJNBa0089E12.13 protein; protein	protein_coding	0.0001	0.046795	0.0001	9.0851	5.17825	6.8892	0.00222172	-8.81411	9.35259e-32	1.68624e-29	down	yes
Zm00001d017798	Zm00001d017798	Zm00001d017798_T028;Zm00001d017798_T039;Zm00001d017798_T038;Zm00001d017798_T009;Zm00001d017798_T003;Zm00001d017798_T007;Zm00001d017798_T040;Zm00001d017798_T012;Zm00001d017798_T025;Zm00001d017798_T034;Zm00001d017798_T008;Zm00001d017798_T010;Zm00001d017798_T027;Zm00001d017798_T004;Zm00001d017798_T001;Zm00001d017798_T046;Zm00001d017798_T033;Zm00001d017798_T023;Zm00001d017798_T037;Zm00001d017798_T044…	GO:0003676(nucleic acid binding);GO:0005515(protein binding);GO:0005634(nucleus);GO:0005694(chromosome);GO:0008168(methyltransferase activity);GO:0008270(zinc ion binding);GO:0016740(transferase activity);GO:0018024(histone-lysine N-methyltransferase activity);GO:0032259(methylation);GO:0034968(histone lysine methylation);GO:0034968(histone lysine methylation)	NA	NA	NA	Histone-lysine N-methyltransferase SUVR5	protein_coding	0.750931	0.886665	0.897047	0.0001	0.0001	0.0001	8448.81	13.0445	1.40929e-31	2.51954e-29	up	yes
Zm00001d036331	Zm00001d036331	Zm00001d036331_T001;Zm00001d036331_T002	GO:0000398(mRNA splicing, via spliceosome);GO:0005634(nucleus);GO:0005684(U2-type spliceosomal complex);GO:0005686(U2 snRNP);GO:0005689(U12-type spliceosomal complex);GO:0071011(precatalytic spliceosome);GO:0071013(catalytic step 2 spliceosome);GO:0071013(catalytic step 2 spliceosome)	NA	NA	NA	proline-rich spliceosome-associated (PSP) family protein	protein_coding	0.169599	0.449699	0.49088	13.5059	14.9562	14.4637	0.0258627	-5.27298	1.42674e-31	2.52948e-29	down	yes
Zm00001d022667	Zm00001d022667	Zm00001d022667_T001	NA	NA	NA	NA		lincRNA	0.0001	0.0001	0.0001	15.7202	20.0702	18.03	5.57409e-06	-17.4528	1.46249e-31	2.57144e-29	down	yes
Zm00001d013664	Zm00001d013664	Zm00001d013664_T001;Zm00001d013664_T003;Zm00001d013664_T006;Zm00001d013664_T008;Zm00001d013664_T005;Zm00001d013664_T002;Zm00001d013664_T004;Zm00001d013664_T009	GO:0000287(magnesium ion binding);GO:0005737(cytoplasm);GO:0005829(cytosol);GO:0008253(5'-nucleotidase activity);GO:0016311(dephosphorylation);GO:0016791(phosphatase activity);GO:0016791(phosphatase activity)	NA	NA	NA	5'-nucleotidases;magnesium ion binding	protein_coding	0.0001	0.0151744	0.0153657	2.7854	4.18296	2.75802	0.00315021	-8.31034	1.6157e-31	2.81322e-29	down	yes
Zm00001d010510	Zm00001d010510	Zm00001d010510_T001	GO:0005783(endoplasmic reticulum);GO:0005789(endoplasmic reticulum membrane);GO:0006629(lipid metabolic process);GO:0006631(fatty acid metabolic process);GO:0006633(fatty acid biosynthetic process);GO:0016020(membrane);GO:0016021(integral component of membrane);GO:0016829(lyase activity);GO:0102158(very-long-chain 3-hydroxyacyl-CoA dehydratase activity);GO:0102343(3-hydroxy-arachidoyl-CoA dehydra…	NA	NA	NA		protein_coding	0.0001	0.0001	0.0001	6.37982	7.83796	5.71181	1.5053e-05	-16.0196	1.62645e-31	2.81322e-29	down	yes
Zm00001d026277	coproporphyrinogen III oxidase2	Zm00001d026277_T004;Zm00001d026277_T002;Zm00001d026277_T001;Zm00001d026277_T003	GO:0004109(coproporphyrinogen oxidase activity);GO:0005737(cytoplasm);GO:0005829(cytosol);GO:0006779(porphyrin-containing compound biosynthetic process);GO:0006782(protoporphyrinogen IX biosynthetic process);GO:0009570(chloroplast stroma);GO:0016491(oxidoreductase activity);GO:0019353(protoporphyrinogen IX biosynthetic process from glutamate);GO:0055114(oxidation-reduction process);GO:0055114(oxi…	NA	NA	NA	coproporphyrinogen III oxidase2	protein_coding	0.618777	0.565532	0.279844	19.0239	26.0009	22.3254	0.0217394	-5.52354	1.99956e-31	3.43069e-29	down	yes
Zm00001d053092	Zm00001d053092	Zm00001d053092_T027;Zm00001d053092_T031;Zm00001d053092_T025;Zm00001d053092_T001;Zm00001d053092_T018;Zm00001d053092_T015;Zm00001d053092_T029;Zm00001d053092_T005;Zm00001d053092_T023;Zm00001d053092_T006;Zm00001d053092_T021;Zm00001d053092_T052;Zm00001d053092_T042;Zm00001d053092_T002;Zm00001d053092_T051;Zm00001d053092_T030;Zm00001d053092_T014;Zm00001d053092_T010;Zm00001d053092_T019;Zm00001d053092_T035…	GO:0000166(nucleotide binding);GO:0005525(GTP binding);GO:0005622(intracellular);GO:0016020(membrane);GO:0016021(integral component of membrane);GO:0016021(integral component of membrane)	NA	NA	NA		protein_coding	0.0754608	0.264607	0.173778	8.75672	4.6018	8.22527	0.023807	-5.39247	3.62644e-31	6.1722e-29	down	yes
Zm00001d016021	Zm00001d016021	Zm00001d016021_T001	GO:0005794(Golgi apparatus);GO:0016020(membrane);GO:0016021(integral component of membrane)	NA	NA	NA	Protein LIKE COV 1	protein_coding	0.0001	0.0001	0.0001	5.98798	7.77096	8.18729	1.36698e-05	-16.1587	4.61365e-31	7.79011e-29	down	yes
Zm00001d014030	Zm00001d014030	Zm00001d014030_T001	GO:0003824(catalytic activity);GO:0005975(carbohydrate metabolic process);GO:0006099(tricarboxylic acid cycle);GO:0006107(oxaloacetate metabolic process);GO:0006108(malate metabolic process);GO:0006734(NADH metabolic process);GO:0016491(oxidoreductase activity);GO:0016615(malate dehydrogenase activity);GO:0016616(oxidoreductase activity, acting on the CH-OH group of donors, NAD or NADP as accepto…	NA	NA	NA	Malate dehydrogenase cytoplasmic 1	protein_coding	0.0001	0.183478	0.231629	21.0909	20.8181	14.5216	0.00735782	-7.08651	6.14837e-31	1.02997e-28	down	yes
Zm00001d018955	Zm00001d018955	Zm00001d018955_T001	GO:0004672(protein kinase activity);GO:0004675(transmembrane receptor protein serine/threonine kinase activity);GO:0005524(ATP binding);GO:0005886(plasma membrane);GO:0006468(protein phosphorylation);GO:0016301(kinase activity);GO:0016310(phosphorylation)	NA	NA	NA	Receptor-like cytosolic serine/threonine-protein kinase RBK1	protein_coding	0.0001	0.0001	0.0001	14.0616	14.2902	10.9958	7.62436e-06	-17.001	6.59137e-31	1.09556e-28	down	yes
Zm00001d007578	Zm00001d007578	Zm00001d007578_T001	GO:0003824(catalytic activity);GO:0004014(adenosylmethionine decarboxylase activity);GO:0005829(cytosol);GO:0006597(spermine biosynthetic process);GO:0008295(spermidine biosynthetic process);GO:0016301(kinase activity);GO:0016310(phosphorylation);GO:0046872(metal ion binding)	NA	NA	NA	[Pyruvate dehydrogenase (acetyl-transferring)] kinase mitochondrial	protein_coding	3.20017	3.42406	2.97239	0.0001	0.0001	0.0001	31988.7	14.9653	6.82291e-31	1.12525e-28	up	yes
Zm00001d006033	Zm00001d006033	Zm00001d006033_T020;Zm00001d006033_T030;Zm00001d006033_T005;Zm00001d006033_T025;Zm00001d006033_T016;Zm00001d006033_T024;Zm00001d006033_T035;Zm00001d006033_T010;Zm00001d006033_T026;Zm00001d006033_T001;Zm00001d006033_T017;Zm00001d006033_T034;Zm00001d006033_T014;Zm00001d006033_T011;Zm00001d006033_T008;Zm00001d006033_T039;Zm00001d006033_T018;Zm00001d006033_T032;Zm00001d006033_T009;Zm00001d006033_T037…	GO:0003824(catalytic activity);GO:0004672(protein kinase activity);GO:0005516(calmodulin binding);GO:0005524(ATP binding);GO:0006099(tricarboxylic acid cycle);GO:0006468(protein phosphorylation);GO:0006952(defense response);GO:0008964(phosphoenolpyruvate carboxylase activity);GO:0009607(response to biotic stimulus);GO:0015977(carbon fixation);GO:0016020(membrane);GO:0016021(integral component of …	NA	K08472	NA	Inactive LRR receptor-like serine/threonine-protein kinase BIR2	protein_coding	0.252137	0.240618	0.221879	5.24798	5.41937	5.19628	0.0450485	-4.47238	7.98849e-31	1.30735e-28	down	yes
Zm00001d047970	Zm00001d047970	Zm00001d047970_T001;Zm00001d047970_T002	GO:0004553(hydrolase activity, hydrolyzing O-glycosyl compounds);GO:0005576(extracellular region);GO:0005618(cell wall);GO:0005975(carbohydrate metabolic process);GO:0006073(cellular glucan metabolic process);GO:0008152(metabolic process);GO:0010411(xyloglucan metabolic process);GO:0016740(transferase activity);GO:0016762(xyloglucan:xyloglucosyl transferase activity);GO:0016787(hydrolase activity…	NA	NA	NA	Probable xyloglucan endotransglucosylase/hydrolase protein 28	protein_coding	7.67168	20.7602	17.4877	0.321531	0.119239	0.235817	67.8695	6.08469	1.33375e-30	2.16606e-28	up	yes
Zm00001d021905	Zm00001d021905	Zm00001d021905_T001	NA	NA	NA	NA		protein_coding	0.150777	0.0001	0.0001	364.493	43.0823	170.122	0.000261342	-11.9018	1.40145e-30	2.25877e-28	down	yes
Zm00001d011990	Zm00001d011990	Zm00001d011990_T001	GO:0000724(double-strand break repair via homologous recombination);GO:0003677(DNA binding);GO:0005507(copper ion binding);GO:0008131(primary amine oxidase activity);GO:0009308(amine metabolic process);GO:0048038(quinone binding);GO:0055114(oxidation-reduction process)	NA	NA	NA	cobalt ion binding	protein_coding	5.93584	6.89068	7.73987	0.0001	0.0001	0.0001	68554.6	16.065	2.30238e-30	3.68294e-28	up	yes
Zm00001d032139	Zm00001d032139	Zm00001d032139_T002;Zm00001d032139_T005;Zm00001d032139_T003;Zm00001d032139_T001	GO:0003735(structural constituent of ribosome);GO:0005840(ribosome);GO:0006412(translation);GO:0022627(cytosolic small ribosomal subunit);GO:0022627(cytosolic small ribosomal subunit)	03010(Ribosome);03010(Ribosome)	K02961	NA	30S ribosomal protein S17	protein_coding	0.0001	0.0001	0.0001	2.14425	2.65005	2.32307	4.21504e-05	-14.5341	2.34793e-30	3.72777e-28	down	yes
Zm00001d024475	Zm00001d024475	Zm00001d024475_T001	NA	NA	NA	NA		protein_coding	0.0001	0.0001	0.0001	8.58335	4.44844	6.33319	1.54919e-05	-15.9781	2.40608e-30	3.7918e-28	down	yes
Zm00001d027051	Zm00001d027051	Zm00001d027051_T001	NA	NA	NA	NA		lincRNA	60.3795	30.0141	28.3504	0.0001	0.0001	0.0001	395813	18.5945	2.93663e-30	4.59388e-28	up	yes
Zm00001d025017	Zm00001d025017	Zm00001d025017_T001	NA	NA	NA	NA		protein_coding	2.67056	9.16786	6.16429	0.0001	0.0001	0.0001	60009	15.8729	3.00867e-30	4.67222e-28	up	yes
Zm00001d034772	Zm00001d034772	Zm00001d034772_T082;Zm00001d034772_T078;Zm00001d034772_T071;Zm00001d034772_T079;Zm00001d034772_T039;Zm00001d034772_T018;Zm00001d034772_T022;Zm00001d034772_T049;Zm00001d034772_T034;Zm00001d034772_T076;Zm00001d034772_T014;Zm00001d034772_T013;Zm00001d034772_T005;Zm00001d034772_T033;Zm00001d034772_T011;Zm00001d034772_T088;Zm00001d034772_T073;Zm00001d034772_T089;Zm00001d034772_T007;Zm00001d034772_T030…	GO:0016020(membrane);GO:0016021(integral component of membrane);GO:0016021(integral component of membrane)	NA	NA	NA	Encodes a close homolog of the Cauliflower OR (Orange) protein. The function of OR is to induce the differentiation of proplastids or other noncolored plastids into chromoplasts for carotenoid accumulation. Both proteins contain a Cysteine-rich zi /.../ger domain that is highly specific to DnaJ-like molecular chaperons.	protein_coding	0.155593	0.242246	0.122752	4.09923	3.51914	3.98317	0.0448725	-4.47802	4.08304e-30	6.29469e-28	down	yes
Zm00001d006586	Zm00001d006586	Zm00001d006586_T001	GO:0000413(protein peptidyl-prolyl isomerization);GO:0003755(peptidyl-prolyl cis-trans isomerase activity);GO:0005634(nucleus);GO:0005829(cytosol);GO:0016853(isomerase activity)	NA	NA	NA	Peptidyl-prolyl cis-trans isomerase Pin1	protein_coding	0.0001	0.0001	0.0001	8.59716	10.1335	7.39314	1.14838e-05	-16.41	5.27074e-30	8.06727e-28	down	yes
Zm00001d011436	Zm00001d011436	Zm00001d011436_T003;Zm00001d011436_T006;Zm00001d011436_T002;Zm00001d011436_T005;Zm00001d011436_T001;Zm00001d011436_T004	GO:0004588(orotate phosphoribosyltransferase activity);GO:0004590(orotidine-5'-phosphate decarboxylase activity);GO:0006222(UMP biosynthetic process);GO:0019856(pyrimidine nucleobase biosynthetic process);GO:0044205('de novo' UMP biosynthetic process);GO:0044205('de novo' UMP biosynthetic process)	NA	NA	NA		protein_coding	4.28602	5.23238	4.66655	0.0001	0.0001	0.0446597	316.207	8.30473	6.10025e-30	9.2702e-28	up	yes
Zm00001d035885	Zm00001d035885	Zm00001d035885_T001	NA	NA	NA	NA		protein_coding	0.0001	0.0001	0.0001	9.79353	11.8214	11.8032	8.97716e-06	-16.7653	7.12961e-30	1.07576e-27	down	yes
Zm00001d035748	Zm00001d035748	Zm00001d035748_T001	GO:0004674(protein serine/threonine kinase activity);GO:0005634(nucleus);GO:0005737(cytoplasm);GO:0018105(peptidyl-serine phosphorylation)	NA	NA	NA	SEC14 cytosolic factor family protein / phosphoglyceride transfer family protein	protein_coding	0.0001	0.231702	0.0001	23.7868	23.9234	33.7785	0.00284581	-8.45694	7.2618e-30	1.08205e-27	down	yes
Zm00001d038675	Zm00001d038675	Zm00001d038675_T564;Zm00001d038675_T575;Zm00001d038675_T240;Zm00001d038675_T265;Zm00001d038675_T003;Zm00001d038675_T298;Zm00001d038675_T588;Zm00001d038675_T225;Zm00001d038675_T106;Zm00001d038675_T029;Zm00001d038675_T246;Zm00001d038675_T119;Zm00001d038675_T542;Zm00001d038675_T026;Zm00001d038675_T232;Zm00001d038675_T007;Zm00001d038675_T235;Zm00001d038675_T270;Zm00001d038675_T554;Zm00001d038675_T032…	GO:0016020(membrane);GO:0016021(integral component of membrane);GO:0016760(cellulose synthase (UDP-forming) activity);GO:0030244(cellulose biosynthetic process);GO:0030244(cellulose biosynthetic process)	NA	NA	NA	SEC14 cytosolic factor family protein / phosphoglyceride transfer family protein	protein_coding	0.0970734	0.0686968	0.0491023	3.55286	2.43355	3.67958	0.0222298	-5.49136	7.27302e-30	1.08205e-27	down	yes
Zm00001d024227	Zm00001d024227	Zm00001d024227_T001	NA	NA	NA	NA		protein_coding	0.0001	0.10323	0.0001	12.7827	23.797	14.4389	0.0020273	-8.94622	7.8873e-30	1.16529e-27	down	yes
Zm00001d007319	Zm00001d007319	Zm00001d007319_T003;Zm00001d007319_T002;Zm00001d007319_T001	GO:0004252(serine-type endopeptidase activity);GO:0006508(proteolysis);GO:0008233(peptidase activity);GO:0008236(serine-type peptidase activity);GO:0016787(hydrolase activity);GO:0016787(hydrolase activity)	NA	NA	NA	Subtilisin-like serine endopeptidase family protein	protein_coding	17.8761	24.231	18.2771	1.0967	0.801035	1.12108	20.0026	4.32212	8.08414e-30	1.18614e-27	up	yes
Zm00001d003067	Zm00001d003067	Zm00001d003067_T003;Zm00001d003067_T002;Zm00001d003067_T001	GO:0005739(mitochondrion);GO:0009926(auxin polar transport);GO:0009941(chloroplast envelope);GO:0010224(response to UV-B);GO:0010224(response to UV-B)	NA	NA	NA	Protein root UVB sensitive 2 chloroplastic	protein_coding	0.0001	0.0001	0.0001	4.22507	5.44258	5.95077	1.92081e-05	-15.6679	1.0436e-29	1.52072e-27	down	yes
Zm00001d053835	Zm00001d053835	Zm00001d053835_T001	GO:0005524(ATP binding);GO:0016301(kinase activity);GO:0016310(phosphorylation)	NA	NA	NA	AT2G19470 (E=1e-039) ckl5 | ckl5 (Casein Kinase I-like 5); ATP binding / kinase/ protein kinase/ protein serine/threonine kinase	protein_coding	6.61074	7.38442	6.72007	0.0001	0.0001	0.0001	69050.8	16.0754	1.45937e-29	2.11211e-27	up	yes
Zm00001d024258	Zm00001d024258	Zm00001d024258_T001	GO:0016491(oxidoreductase activity);GO:0046872(metal ion binding);GO:0051213(dioxygenase activity);GO:0055114(oxidation-reduction process)	NA	NA	NA	Probable 2-oxoacid dependent dioxygenase	protein_coding	1.3068	1.09667	0.831815	39.1607	25.3584	33.0111	0.0331722	-4.91388	2.91632e-29	4.1922e-27	down	yes
Zm00001d005529	Zm00001d005529	Zm00001d005529_T001	GO:0000398(mRNA splicing, via spliceosome);GO:0005684(U2-type spliceosomal complex)	NA	NA	NA	CBF1-interacting co-repressor CIR N-terminal;Pre-mRNA splicing factor	protein_coding	0.0001	0.0001	0.10073	12.1457	17.42	10.2571	0.00253448	-8.6241	3.00326e-29	4.28821e-27	down	yes
Zm00001d007853	Zm00001d007853	Zm00001d007853_T002;Zm00001d007853_T001;Zm00001d007853_T003	GO:0006355(regulation of transcription, DNA-templated);GO:0006355(regulation of transcription, DNA-templated)	NA	NA	NA		protein_coding	0.938936	2.5769	1.84154	0.0001	0.0001	0.0001	17857.9	14.1243	3.75032e-29	5.3192e-27	up	yes
Zm00001d013386	Zm00001d013386	Zm00001d013386_T001	NA	NA	NA	NA		protein_coding	0.0001	0.0001	0.0001	18.9043	20.1297	16.8755	5.36582e-06	-17.5078	3.91715e-29	5.51903e-27	down	yes
Zm00001d027788	Zm00001d027788	Zm00001d027788_T043;Zm00001d027788_T002;Zm00001d027788_T015;Zm00001d027788_T014;Zm00001d027788_T009;Zm00001d027788_T045;Zm00001d027788_T035;Zm00001d027788_T031;Zm00001d027788_T021;Zm00001d027788_T034;Zm00001d027788_T040;Zm00001d027788_T023;Zm00001d027788_T024;Zm00001d027788_T020;Zm00001d027788_T042;Zm00001d027788_T005;Zm00001d027788_T010;Zm00001d027788_T027;Zm00001d027788_T017;Zm00001d027788_T029…	GO:0004675(transmembrane receptor protein serine/threonine kinase activity);GO:0005886(plasma membrane);GO:0006468(protein phosphorylation);GO:0007178(transmembrane receptor protein serine/threonine kinase signaling pathway);GO:0016020(membrane);GO:0016021(integral component of membrane);GO:0016021(integral component of membrane)	NA	NA	NA		protein_coding	0.0001	0.0001	0.0001	0.794206	0.976363	1.09513	0.000104686	-13.2216	7.40664e-29	1.03669e-26	down	yes
Zm00001d010446	Zm00001d010446	Zm00001d010446_T001	GO:0000272(polysaccharide catabolic process);GO:0003824(catalytic activity);GO:0004553(hydrolase activity, hydrolyzing O-glycosyl compounds);GO:0005975(carbohydrate metabolic process);GO:0008152(metabolic process);GO:0008810(cellulase activity);GO:0016787(hydrolase activity);GO:0016798(hydrolase activity, acting on glycosyl bonds);GO:0030245(cellulose catabolic process);GO:0030246(carbohydrate bi…	00500(Starch and sucrose metabolism)	K01179	EC:3.2.1.4	Endoglucanase 6	protein_coding	0.0001	0.0001	0.0001	2.5724	3.68234	3.09873	3.20737e-05	-14.9283	7.55656e-29	1.05076e-26	down	yes
Zm00001d036537	Zm00001d036537	Zm00001d036537_T015;Zm00001d036537_T004;Zm00001d036537_T005;Zm00001d036537_T003;Zm00001d036537_T008;Zm00001d036537_T013;Zm00001d036537_T001;Zm00001d036537_T007;Zm00001d036537_T016;Zm00001d036537_T012;Zm00001d036537_T002;Zm00001d036537_T009;Zm00001d036537_T014;Zm00001d036537_T010;Zm00001d036537_T011;Zm00001d036537_T006;Zm00001d036537_T017	GO:0003872(6-phosphofructokinase activity);GO:0006096(glycolytic process);GO:0016740(transferase activity);GO:0061615(glycolytic process through fructose-6-phosphate);GO:0061615(glycolytic process through fructose-6-phosphate)	NA	NA	NA	Pyrophosphate--fructose 6-phosphate 1-phosphotransferase subunit alpha 2	protein_coding	0.0001	0.0001	0.0001	1.89724	1.09324	1.64313	6.47444e-05	-13.9149	8.3978e-29	1.16015e-26	down	yes
Zm00001d017368	Zm00001d017368	Zm00001d017368_T001	GO:0005515(protein binding)	NA	NA	NA		protein_coding	0.0001	0.040282	0.0001	7.69204	5.28748	7.36511	0.00198981	-8.97315	9.30444e-29	1.27711e-26	down	yes
Zm00001d036506	Zm00001d036506	Zm00001d036506_T001	NA	NA	NA	NA	Lipid binding protein	protein_coding	5.78027	6.41967	7.42742	0.0001	0.0001	0.0001	65424.5	15.9975	1.11527e-28	1.52098e-26	up	yes
Zm00001d023904	auxin binding protein homolog4	Zm00001d023904_T003;Zm00001d023904_T001;Zm00001d023904_T002	GO:0000911(cytokinesis by cell plate formation);GO:0005783(endoplasmic reticulum);GO:0005788(endoplasmic reticulum lumen);GO:0008270(zinc ion binding);GO:0009734(auxin-activated signaling pathway);GO:0009826(unidimensional cell growth);GO:0010011(auxin binding);GO:0032877(positive regulation of DNA endoreduplication);GO:0045793(positive regulation of cell size);GO:0046872(metal ion binding);GO:00…	NA	NA	NA	Auxin-binding protein 4	protein_coding	32.6972	36.302	35.8214	1.08009	1.64071	1.92013	22.5861	4.49737	1.25957e-28	1.70684e-26	up	yes
Zm00001d035329	Zm00001d035329	Zm00001d035329_T001	GO:0003824(catalytic activity);GO:0004789(thiamine-phosphate diphosphorylase activity);GO:0005737(cytoplasm);GO:0009228(thiamine biosynthetic process)	NA	NA	NA	Thiamine biosynthetic bifunctional enzyme TH1 chloroplastic	protein_coding	6.9329	7.78127	7.82255	0.0001	0.0001	0.0001	75122.4	16.197	1.4946e-28	2.0125e-26	up	yes
Zm00001d030105	Zm00001d030105	Zm00001d030105_T001;Zm00001d030105_T002	NA	NA	NA	NA		protein_coding	0.0001	0.00399063	0.0001	4.39131	5.13639	3.93739	0.000311222	-11.6498	1.80305e-28	2.41257e-26	down	yes
Zm00001d030851	Zm00001d030851	Zm00001d030851_T001	GO:0004497(monooxygenase activity);GO:0005506(iron ion binding);GO:0016020(membrane);GO:0016021(integral component of membrane);GO:0016491(oxidoreductase activity);GO:0016705(oxidoreductase activity, acting on paired donors, with incorporation or reduction of molecular oxygen);GO:0016709(oxidoreductase activity, acting on paired donors, with incorporation or reduction of molecular oxygen, NAD(P)H…	NA	NA	NA	Cytochrome P450 CYP81N5	protein_coding	1.39487	1.66716	1.55888	22.1404	28.9081	28.3956	0.0581655	-4.10369	2.64266e-28	3.51391e-26	down	yes
Zm00001d007437	Zm00001d007437	Zm00001d007437_T001;Zm00001d007437_T002	GO:0000278(mitotic cell cycle);GO:0000775(chromosome, centromeric region);GO:0005634(nucleus);GO:0005737(cytoplasm);GO:0006888(endoplasmic reticulum to Golgi vesicle-mediated transport);GO:0007094(mitotic spindle assembly checkpoint);GO:1990423(RZZ complex);GO:1990423(RZZ complex)	NA	NA	NA	Centromere/kinetochore protein zw10 homolog	protein_coding	6.36034	6.78023	6.31944	0.0001	0.0001	0.0001	64866.7	15.9852	3.22677e-28	4.26395e-26	up	yes
Zm00001d012761	Zm00001d012761	Zm00001d012761_T008;Zm00001d012761_T007;Zm00001d012761_T003;Zm00001d012761_T005;Zm00001d012761_T006;Zm00001d012761_T004;Zm00001d012761_T002;Zm00001d012761_T001	GO:0000166(nucleotide binding);GO:0004672(protein kinase activity);GO:0004674(protein serine/threonine kinase activity);GO:0005524(ATP binding);GO:0005634(nucleus);GO:0005737(cytoplasm);GO:0006468(protein phosphorylation);GO:0006897(endocytosis);GO:0016301(kinase activity);GO:0016310(phosphorylation);GO:0018105(peptidyl-serine phosphorylation);GO:0018107(peptidyl-threonine phosphorylation);GO:001…	NA	NA	NA	Protein kinase family protein	protein_coding	1.06038	2.20304	1.71762	0.0001	0.0001	0.0001	16603.5	14.0192	3.91369e-28	5.13974e-26	up	yes
Zm00001d000843	Zm00001d000843	Zm00001d000843_T001	NA	NA	NA	NA		lincRNA	0.0001	0.044267	0.0001	9.09224	8.6258	9.66043	0.00162416	-9.26609	4.80832e-28	6.27589e-26	down	yes
Zm00001d013713	Zm00001d013713	Zm00001d013713_T002;Zm00001d013713_T003;Zm00001d013713_T001	GO:0005739(mitochondrion);GO:0016226(iron-sulfur cluster assembly);GO:0032981(mitochondrial respiratory chain complex I assembly);GO:0051539(4 iron, 4 sulfur cluster binding);GO:0051539(4 iron, 4 sulfur cluster binding)	NA	NA	NA	Nucleotide-binding protein-like	protein_coding	6.12031	4.003	6.663	0.0001	0.0001	0.0001	55954.3	15.772	5.04262e-28	6.53181e-26	up	yes
Zm00001d047781	Zm00001d047781	Zm00001d047781_T001	GO:0005634(nucleus);GO:0016567(protein ubiquitination);GO:0061630(ubiquitin protein ligase activity)	NA	K13125	NA	phosphoinositide binding	protein_coding	0.0001	0.0001	0.0001	5.33474	5.15715	5.84561	1.83627e-05	-15.7329	5.0658e-28	6.53181e-26	down	yes
Zm00001d041300	Zm00001d041300	Zm00001d041300_T001	NA	NA	NA	NA		protein_coding	0.0001	0.0001	0.0001	13.0363	16.6129	10.8127	7.41437e-06	-17.0412	5.68155e-28	7.28163e-26	down	yes
Zm00001d012801	Zm00001d012801	Zm00001d012801_T001;Zm00001d012801_T003;Zm00001d012801_T008;Zm00001d012801_T012;Zm00001d012801_T002;Zm00001d012801_T011;Zm00001d012801_T005	GO:0003677(DNA binding);GO:0046872(metal ion binding);GO:0046872(metal ion binding)	NA	NA	NA	TRF-like 10	protein_coding	0.0001	0.0001	0.0001	1.0185	1.09084	1.13249	9.25402e-05	-13.3996	5.92521e-28	7.54843e-26	down	yes
Zm00001d046026	Zm00001d046026	Zm00001d046026_T001	NA	NA	NA	NA		protein_coding	0.0001	0.012109	0.0001	2.8368	3.99141	4.02822	0.0011338	-9.78462	6.34907e-28	8.04026e-26	down	yes
Zm00001d042225	Zm00001d042225	Zm00001d042225_T002;Zm00001d042225_T003;Zm00001d042225_T001	GO:0030001(metal ion transport);GO:0046872(metal ion binding);GO:0046872(metal ion binding)	NA	NA	NA	Heavy metal transport/detoxification superfamily protein	protein_coding	88.5885	143.002	133.253	5.66749	2.65418	4.86099	27.676	4.79056	7.38714e-28	9.29949e-26	up	yes
Zm00001d046755	ARR-B-transcription factor 4	Zm00001d046755_T001	GO:0000160(phosphorelay signal transduction system);GO:0003677(DNA binding);GO:0005634(nucleus)	04075(Plant hormone signal transduction)	K14491	NA	Putative two-component response regulator family protein	protein_coding	0.0001	0.0001	0.0001	2.21871	2.15226	2.29527	4.50028e-05	-14.4396	8.2143e-28	1.028e-25	down	yes
Zm00001d003411	Zm00001d003411	Zm00001d003411_T002;Zm00001d003411_T001	GO:0003735(structural constituent of ribosome);GO:0005840(ribosome);GO:0006412(translation);GO:0006412(translation)	NA	NA	NA	30S ribosomal protein 3 chloroplastic	protein_coding	5.49299	7.58956	7.28066	103.676	121.641	96.6999	0.0632365	-3.9831	9.28769e-28	1.15553e-25	down	yes
Zm00001d029551	Zm00001d029551	Zm00001d029551_T001;Zm00001d029551_T002	NA	NA	NA	NA		protein_coding	18.6587	11.3939	8.85421	0.0001	0.0001	0.0001	129689	16.9847	9.52145e-28	1.17773e-25	up	yes
Zm00001d023323	Zm00001d023323	Zm00001d023323_T030;Zm00001d023323_T021;Zm00001d023323_T008;Zm00001d023323_T047;Zm00001d023323_T006;Zm00001d023323_T007;Zm00001d023323_T057;Zm00001d023323_T050;Zm00001d023323_T013;Zm00001d023323_T044;Zm00001d023323_T037;Zm00001d023323_T056;Zm00001d023323_T063;Zm00001d023323_T027;Zm00001d023323_T034;Zm00001d023323_T051;Zm00001d023323_T018;Zm00001d023323_T015;Zm00001d023323_T040;Zm00001d023323_T024…	GO:0043531(ADP binding);GO:0043531(ADP binding)	NA	NA	NA		protein_coding	3.88666	6.86959	7.25098	0.401229	0.238272	0.276871	19.6506	4.2965	2.2287e-27	2.74079e-25	up	yes
Zm00001d032206	MYB-transcription factor 125	Zm00001d032206_T001	GO:0000976(transcription regulatory region sequence-specific DNA binding);GO:0003677(DNA binding);GO:0003700(DNA-binding transcription factor activity);GO:0005634(nucleus);GO:0006355(regulation of transcription, DNA-templated);GO:0030154(cell differentiation);GO:0043565(sequence-specific DNA binding);GO:0044212(transcription regulatory region DNA binding)	NA	K09422	NA	myb domain protein 106	protein_coding	0.0001	0.0001	0.0001	4.19351	3.56326	3.6546	2.62896e-05	-15.2151	3.31627e-27	4.05481e-25	down	yes
Zm00001d049011	Zm00001d049011	Zm00001d049011_T001	GO:0008289(lipid binding);GO:0015914(phospholipid transport)	NA	NA	NA	Polyketide cyclase/dehydrase and lipid transport superfamily protein	protein_coding	15.1669	15.0136	16.178	0.075414	0.217895	0.0001	158	7.30378	3.60186e-27	4.37883e-25	up	yes
Zm00001d004333	Zm00001d004333	Zm00001d004333_T001	NA	NA	NA	NA		protein_coding	0.0001	0.0001	0.0001	5.10058	5.62811	7.44217	1.65099e-05	-15.8863	4.3516e-27	5.26024e-25	down	yes
Zm00001d001811	Zm00001d001811	Zm00001d001811_T001;Zm00001d001811_T003;Zm00001d001811_T004;Zm00001d001811_T002	GO:0016020(membrane);GO:0016021(integral component of membrane);GO:0016021(integral component of membrane)	NA	NA	NA	Tetraspanin-19	protein_coding	0.0001	0.0001	0.0001	4.13933	3.01564	5.17251	2.43359e-05	-15.3266	4.64654e-27	5.58504e-25	down	yes
Zm00001d046779	Zm00001d046779	Zm00001d046779_T005;Zm00001d046779_T001;Zm00001d046779_T006;Zm00001d046779_T002;Zm00001d046779_T007;Zm00001d046779_T004;Zm00001d046779_T003	GO:0003700(DNA-binding transcription factor activity);GO:0004363(glutathione synthase activity);GO:0005524(ATP binding);GO:0005634(nucleus);GO:0006355(regulation of transcription, DNA-templated);GO:0006750(glutathione biosynthetic process);GO:0016874(ligase activity);GO:0016874(ligase activity)	NA	NA	NA	Glutathione synthetase chloroplastic	protein_coding	0.0001	0.0001	0.0001	1.2459	0.875042	1.28879	8.79835e-05	-13.4724	5.01013e-27	5.98823e-25	down	yes
Zm00001d039494	Zm00001d039494	Zm00001d039494_T001	GO:0019888(protein phosphatase regulator activity);GO:0019903(protein phosphatase binding);GO:0043666(regulation of phosphoprotein phosphatase activity)	NA	NA	NA	SIT4 phosphatase-associated family protein	protein_coding	0.0001	0.0001	0.0001	8.29859	7.41329	7.92918	1.26898e-05	-16.266	5.88598e-27	6.99577e-25	down	yes
Zm00001d028184	Zm00001d028184	Zm00001d028184_T001;Zm00001d028184_T002	NA	NA	NA	NA		protein_coding	0.0001	0.0001	0.0001	5.02151	4.05741	5.17333	2.10493e-05	-15.5359	6.8235e-27	8.065e-25	down	yes
Zm00001d032539	Zm00001d032539	Zm00001d032539_T001	GO:0000166(nucleotide binding);GO:0005524(ATP binding);GO:0016301(kinase activity);GO:0016307(phosphatidylinositol phosphate kinase activity);GO:0016308(1-phosphatidylinositol-4-phosphate 5-kinase activity);GO:0016310(phosphorylation);GO:0016740(transferase activity);GO:0046488(phosphatidylinositol metabolic process);GO:0046854(phosphatidylinositol phosphorylation)	00562(Inositol phosphate metabolism);04070(Phosphatidylinositol signaling system);04144(Endocytosis)	K00889	EC:2.7.1.68	Phosphatidylinositol 4-phosphate 5-kinase 9	protein_coding	1.38917	1.87884	3.3089	0.0001	0.0001	0.0001	21923	14.4202	6.89516e-27	8.10467e-25	up	yes
Zm00001d013429	Zm00001d013429	Zm00001d013429_T001	GO:0019904(protein domain specific binding)	NA	NA	NA	14-3-3-like protein GF14 omega	protein_coding	0.0001	0.0001	0.0001	2.13165	3.59501	3.7931	3.15134e-05	-14.9537	6.95872e-27	8.13444e-25	down	yes
Zm00001d011303	Zm00001d011303	Zm00001d011303_T001	GO:0016020(membrane);GO:0016021(integral component of membrane)	NA	NA	NA		protein_coding	0.0001	0.0001	0.0001	9.76961	20.4855	16.2742	6.44754e-06	-17.2428	9.85513e-27	1.14573e-24	down	yes
Zm00001d030867	Zm00001d030867	Zm00001d030867_T001;Zm00001d030867_T003;Zm00001d030867_T002	GO:0005623(cell);GO:0006662(glycerol ether metabolic process);GO:0015035(protein disulfide oxidoreductase activity);GO:0016020(membrane);GO:0016021(integral component of membrane);GO:0045454(cell redox homeostasis);GO:0045454(cell redox homeostasis)	NA	NA	NA		protein_coding	2.00405	2.21004	2.37632	0.0001	0.0001	0.0001	21968	14.4231	1.27138e-26	1.47003e-24	up	yes
Zm00001d017609	MYB-related-transcription factor 100	Zm00001d017609_T003;Zm00001d017609_T001;Zm00001d017609_T004;Zm00001d017609_T011;Zm00001d017609_T012;Zm00001d017609_T007;Zm00001d017609_T009;Zm00001d017609_T016;Zm00001d017609_T013;Zm00001d017609_T010;Zm00001d017609_T018;Zm00001d017609_T015;Zm00001d017609_T005;Zm00001d017609_T008;Zm00001d017609_T019;Zm00001d017609_T006;Zm00001d017609_T002;Zm00001d017609_T014;Zm00001d017609_T020;Zm00001d017609_T017	GO:0003677(DNA binding);GO:0005634(nucleus);GO:0016020(membrane);GO:0016021(integral component of membrane);GO:0016021(integral component of membrane)	NA	NA	NA	Protein REVEILLE 6	protein_coding	4.79141	2.41338	2.6589	0.0181287	0.0382919	0.0285379	116.1	6.85923	1.63145e-26	1.87617e-24	up	yes
Zm00001d048665	Zm00001d048665	Zm00001d048665_T002;Zm00001d048665_T001	GO:0016020(membrane);GO:0016021(integral component of membrane);GO:0043531(ADP binding);GO:0043531(ADP binding)	NA	NA	NA	NB-ARC domain containing protein expressed	protein_coding	0.0001	0.0001	0.0001	2.31488	1.72045	1.91462	5.04206e-05	-14.2756	2.39574e-26	2.74028e-24	down	yes
Zm00001d029476	Zm00001d029476	Zm00001d029476_T001	GO:0016020(membrane);GO:0016021(integral component of membrane);GO:0016301(kinase activity);GO:0016310(phosphorylation)	NA	NA	NA	MOB kinase activator-like 2A	protein_coding	0.0001	0.0001	0.0001	4.73202	4.58008	6.59004	1.88654e-05	-15.6939	2.91872e-26	3.32063e-24	down	yes
Zm00001d004407	Zm00001d004407	Zm00001d004407_T003;Zm00001d004407_T004;Zm00001d004407_T005;Zm00001d004407_T006;Zm00001d004407_T001;Zm00001d004407_T002	GO:0005515(protein binding);GO:0016020(membrane);GO:0016021(integral component of membrane);GO:0016021(integral component of membrane)	NA	NA	NA	Zinc finger CCCH domain-containing protein 59	protein_coding	2.46736	3.42811	1.97497	0.0001	0.0001	0.0001	26234.8	14.6792	3.58494e-26	4.05689e-24	up	yes
Zm00001d036499	Zm00001d036499	Zm00001d036499_T001	NA	NA	NA	NA	oligopeptide transporter-like protein	protein_coding	7.57989	8.86008	11.078	0.0001	0.0001	0.0001	91726.7	16.4851	3.63729e-26	4.09436e-24	up	yes
Zm00001d014769	Zm00001d014769	Zm00001d014769_T001;Zm00001d014769_T002	GO:0004672(protein kinase activity);GO:0005515(protein binding);GO:0005886(plasma membrane);GO:0009506(plasmodesma);GO:0009755(hormone-mediated signaling pathway);GO:0046777(protein autophosphorylation);GO:0046777(protein autophosphorylation)	NA	NA	NA		protein_coding	0.0001	0.0001	0.0001	2.01964	1.95848	2.12218	4.91779e-05	-14.3116	4.93837e-26	5.52968e-24	down	yes
Zm00001d021759	Zm00001d021759	Zm00001d021759_T001;Zm00001d021759_T002;Zm00001d021759_T003	GO:0003676(nucleic acid binding);GO:0003723(RNA binding);GO:0005654(nucleoplasm);GO:0043484(regulation of RNA splicing);GO:1990904(ribonucleoprotein complex);GO:1990904(ribonucleoprotein complex)	NA	K12898	NA	RNA-binding (RRM/RBD/RNP motifs) family protein	protein_coding	0.0538928	0.030779	0.0001	6.74213	5.14802	6.54073	0.00459944	-7.76432	5.52786e-26	6.15734e-24	down	yes
Zm00001d025482	Zm00001d025482	Zm00001d025482_T001	GO:0004867(serine-type endopeptidase inhibitor activity);GO:0005576(extracellular region);GO:0010951(negative regulation of endopeptidase activity)	NA	NA	NA	Bowman-Birk type trypsin inhibitor	protein_coding	0.0001	0.0001	0.0001	6.54981	6.42647	7.47451	1.46694e-05	-16.0568	6.83371e-26	7.57225e-24	down	yes
Zm00001d013554	Zm00001d013554	Zm00001d013554_T001	NA	NA	NA	NA		protein_coding	0.0001	0.0001	0.0001	3.54529	4.64421	2.69226	2.75691e-05	-15.1466	7.50831e-26	8.27664e-24	down	yes
Zm00001d043932	Zm00001d043932	Zm00001d043932_T001	GO:0005623(cell);GO:0009055(electron transfer activity);GO:0015035(protein disulfide oxidoreductase activity);GO:0022900(electron transport chain);GO:0045454(cell redox homeostasis);GO:0055114(oxidation-reduction process)	NA	NA	NA	Grx_I1-glutaredoxin subgroup III	protein_coding	2.32794	2.69589	2.70053	45.2266	78.5809	42.4915	0.0464486	-4.42822	9.33587e-26	1.02382e-23	down	yes
Zm00001d031835	Zm00001d031835	Zm00001d031835_T002;Zm00001d031835_T001	NA	NA	NA	NA		protein_coding	7.55553	7.10003	6.27344	0.0001	0.0001	0.0001	69763.3	16.0902	9.61268e-26	1.04877e-23	up	yes
Zm00001d022845	Zm00001d022845	Zm00001d022845_T001	NA	NA	NA	NA		lincRNA	0.0001	0.0001	0.0001	7.19404	7.64193	7.31435	1.35438e-05	-16.172	1.01238e-25	1.0989e-23	down	yes
Zm00001d044556	Zm00001d044556	Zm00001d044556_T001	NA	NA	NA	NA		protein_coding	0.0001	0.0001	0.0001	8.03629	5.51086	9.19911	1.3189e-05	-16.2103	1.08217e-25	1.16869e-23	down	yes
Zm00001d007871	Zm00001d007871	Zm00001d007871_T005;Zm00001d007871_T003;Zm00001d007871_T007;Zm00001d007871_T009;Zm00001d007871_T008;Zm00001d007871_T001;Zm00001d007871_T002	GO:0000793(condensed chromosome);GO:0005634(nucleus);GO:0006281(DNA repair);GO:0007129(synapsis);GO:0031573(intra-S DNA damage checkpoint);GO:0036297(interstrand cross-link repair);GO:0070182(DNA polymerase binding);GO:1990918(double-strand break repair involved in meiotic recombination);GO:1990918(double-strand break repair involved in meiotic recombination)	NA	K10891	NA		protein_coding	0.0001	0.00975165	0.0575452	4.84967	6.12631	6.84182	0.00378255	-8.04642	1.48755e-25	1.59837e-23	down	yes
Zm00001d013648	Zm00001d013648	Zm00001d013648_T001	GO:0003723(RNA binding);GO:0003743(translation initiation factor activity);GO:0003746(translation elongation factor activity);GO:0006413(translational initiation);GO:0006414(translational elongation);GO:0006452(translational frameshifting);GO:0043022(ribosome binding);GO:0045901(positive regulation of translational elongation);GO:0045905(positive regulation of translational termination)	NA	NA	NA	Eukaryotic translation initiation factor 5A-1	protein_coding	0.0001	0.0001	0.0001	3.21522	4.7847	5.09178	2.29153e-05	-15.4133	1.69832e-25	1.81566e-23	down	yes
Zm00001d010698	Zm00001d010698	Zm00001d010698_T002;Zm00001d010698_T001	GO:0003955(NAD(P)H dehydrogenase (quinone) activity);GO:0010181(FMN binding);GO:0016491(oxidoreductase activity);GO:0055114(oxidation-reduction process);GO:0055114(oxidation-reduction process)	NA	NA	NA	NAD(P)H dehydrogenase (quinone) FQR1	protein_coding	13.15	31.7779	27.0519	0.361891	1.044	0.672886	34.6261	5.11379	1.73345e-25	1.84396e-23	up	yes
Zm00001d015008	Zm00001d015008	Zm00001d015008_T001	GO:0003983(UTP:glucose-1-phosphate uridylyltransferase activity);GO:0005737(cytoplasm);GO:0005977(glycogen metabolic process);GO:0006011(UDP-glucose metabolic process);GO:0016740(transferase activity);GO:0016779(nucleotidyltransferase activity);GO:0070569(uridylyltransferase activity)	00040(Pentose and glucuronate interconversions);00052(Galactose metabolism);00500(Starch and sucrose metabolism);00520(Amino sugar and nucleotide sugar metabolism)	K00963	EC:2.7.7.9	UTP--glucose-1-phosphate uridylyltransferase 1	protein_coding	15.2888	6.82193	9.2354	0.0001	0.052414	0.0001	595.775	9.21862	1.84843e-25	1.95648e-23	up	yes
Zm00001d008926	Zm00001d008926	Zm00001d008926_T001	NA	NA	NA	NA		protein_coding	7.77893	10.3616	13.6906	0.0001	0.0001	0.0001	106104	16.6951	1.8928e-25	1.99354e-23	up	yes
Zm00001d012339	Zm00001d012339	Zm00001d012339_T001	GO:0009507(chloroplast);GO:0016020(membrane);GO:0016021(integral component of membrane)	NA	NA	NA		protein_coding	115.135	143.774	133.821	7.07103	8.34844	9.4244	15.8079	3.98258	2.20706e-25	2.31307e-23	up	yes
Zm00001d022938	Zm00001d022938	Zm00001d022938_T001	NA	NA	NA	NA		lincRNA	2.21104	3.52307	2.36023	0.0001	0.0001	0.0001	26981.2	14.7197	2.62429e-25	2.73685e-23	up	yes
Zm00001d023411	G2-like-transcription factor 5	Zm00001d023411_T001	GO:0003677(DNA binding);GO:0005634(nucleus)	NA	NA	NA	myb-like transcription factor family protein	protein_coding	0.0001	0.166436	0.0001	45.849	15.7156	49.8112	0.00149616	-9.38452	2.74682e-25	2.85066e-23	down	yes
Zm00001d039203	Zm00001d039203	Zm00001d039203_T003;Zm00001d039203_T001;Zm00001d039203_T010;Zm00001d039203_T006;Zm00001d039203_T004;Zm00001d039203_T008;Zm00001d039203_T002;Zm00001d039203_T005;Zm00001d039203_T007	GO:0006886(intracellular protein transport);GO:0006897(endocytosis);GO:0016020(membrane);GO:0016021(integral component of membrane);GO:0016192(vesicle-mediated transport);GO:0030131(clathrin adaptor complex);GO:0031410(cytoplasmic vesicle);GO:0043231(intracellular membrane-bounded organelle);GO:0043231(intracellular membrane-bounded organelle)	NA	NA	NA		protein_coding	0.0001	0.0001	0.0199203	2.48813	1.58748	2.64727	0.00299281	-8.38428	3.02663e-25	3.12581e-23	down	yes
Zm00001d012479	Zm00001d012479	Zm00001d012479_T001;Zm00001d012479_T002;Zm00001d012479_T004;Zm00001d012479_T003	NA	NA	NA	NA		protein_coding	0.861125	1.03678	1.16833	0.0001	0.0001	0.0001	10220.8	13.3192	3.71303e-25	3.81617e-23	up	yes
Zm00001d000978	Zm00001d000978	Zm00001d000978_T001	NA	NA	NA	NA		lincRNA	0.22206	0.111301	0.0001	21.2792	17.2138	14.1764	0.0063312	-7.30331	3.92165e-25	4.01121e-23	down	yes
Zm00001d037507	Zm00001d037507	Zm00001d037507_T006;Zm00001d037507_T008;Zm00001d037507_T013;Zm00001d037507_T011;Zm00001d037507_T001;Zm00001d037507_T004;Zm00001d037507_T010;Zm00001d037507_T009;Zm00001d037507_T005;Zm00001d037507_T014;Zm00001d037507_T002;Zm00001d037507_T020;Zm00001d037507_T022;Zm00001d037507_T003;Zm00001d037507_T021;Zm00001d037507_T007;Zm00001d037507_T018;Zm00001d037507_T016;Zm00001d037507_T012;Zm00001d037507_T023…	GO:0003824(catalytic activity);GO:0003867(4-aminobutyrate transaminase activity);GO:0004015(adenosylmethionine-8-amino-7-oxononanoate transaminase activity);GO:0008483(transaminase activity);GO:0009102(biotin biosynthetic process);GO:0009448(gamma-aminobutyric acid metabolic process);GO:0030170(pyridoxal phosphate binding);GO:0030170(pyridoxal phosphate binding)	NA	NA	NA	Gamma-aminobutyrate transaminase POP2 mitochondrial	protein_coding	21.2362	28.3021	16.0532	1.59069	1.09443	0.988477	17.8548	4.15824	3.94202e-25	4.01275e-23	up	yes
Zm00001d048034	Zm00001d048034	Zm00001d048034_T008;Zm00001d048034_T003;Zm00001d048034_T001;Zm00001d048034_T005;Zm00001d048034_T007;Zm00001d048034_T006;Zm00001d048034_T004	GO:0016020(membrane);GO:0016020(membrane)	NA	NA	NA		protein_coding	0.65287	0.979781	0.796647	0.0001	0.0001	0.0001	8097.66	12.9833	5.05797e-25	5.1242e-23	up	yes
Zm00001d036723	Zm00001d036723	Zm00001d036723_T003;Zm00001d036723_T001	GO:0005515(protein binding);GO:0005669(transcription factor TFIID complex);GO:0005669(transcription factor TFIID complex)	NA	NA	NA		protein_coding	0.0001	0.010373	0.0001	1.15686	1.66124	1.86603	0.0022572	-8.79125	5.1363e-25	5.1789e-23	down	yes
Zm00001d010008	Zm00001d010008	Zm00001d010008_T001	GO:0004721(phosphoprotein phosphatase activity);GO:0006470(protein dephosphorylation);GO:0016311(dephosphorylation);GO:0016787(hydrolase activity);GO:0016791(phosphatase activity)	NA	NA	NA	Haloacid dehalogenase-like hydrolase (HAD) superfamily protein	protein_coding	0.47523	0.477938	0.73743	14.1089	16.7315	17.4514	0.035008	-4.83617	6.63373e-25	6.6572e-23	down	yes
Zm00001d008451	Zm00001d008451	Zm00001d008451_T001	GO:0016020(membrane);GO:0016021(integral component of membrane)	NA	NA	NA		protein_coding	0.0001	0.0001	0.0001	12.7308	18.4331	13.773	6.67603e-06	-17.1926	7.85406e-25	7.84484e-23	down	yes
Zm00001d015817	Zm00001d015817	Zm00001d015817_T001;Zm00001d015817_T002	GO:0003723(RNA binding);GO:0003735(structural constituent of ribosome);GO:0005840(ribosome);GO:0006412(translation);GO:0016020(membrane);GO:0016021(integral component of membrane);GO:0022627(cytosolic small ribosomal subunit);GO:0022627(cytosolic small ribosomal subunit)	NA	NA	NA	40S ribosomal protein S4-3	protein_coding	0.0001	0.0001	0.0001	2.59533	5.10206	7.4776	1.97694e-05	-15.6264	7.97985e-25	7.93324e-23	down	yes
Zm00001d049109	Zm00001d049109	Zm00001d049109_T001	GO:0004197(cysteine-type endopeptidase activity);GO:0005615(extracellular space);GO:0005764(lysosome);GO:0006508(proteolysis);GO:0008233(peptidase activity);GO:0008234(cysteine-type peptidase activity);GO:0051603(proteolysis involved in cellular protein catabolic process)	NA	NA	NA	Cysteine protease	protein_coding	3.5552	6.10762	4.93594	0.0001	0.0001	0.0001	48662.5	15.5705	1.16751e-24	1.15529e-22	up	yes
Zm00001d016841	Zm00001d016841	Zm00001d016841_T002;Zm00001d016841_T001	GO:0004497(monooxygenase activity);GO:0016020(membrane);GO:0016021(integral component of membrane);GO:0055114(oxidation-reduction process);GO:0071949(FAD binding);GO:0071949(FAD binding)	NA	NA	NA	monooxygenase 1	protein_coding	81.6177	187.194	170.126	6.65229	2.49094	2.362	38.1511	5.25365	1.37531e-24	1.35462e-22	up	yes
Zm00001d021708	Zm00001d021708	Zm00001d021708_T002;Zm00001d021708_T006;Zm00001d021708_T004;Zm00001d021708_T008;Zm00001d021708_T003;Zm00001d021708_T007;Zm00001d021708_T001;Zm00001d021708_T005	GO:0005515(protein binding);GO:0005515(protein binding)	NA	NA	NA	Pentatricopeptide repeat-containing protein chloroplastic	protein_coding	1.24169	1.62481	1.48302	20.2856	18.2521	15.4717	0.0805329	-3.63428	2.79533e-24	2.74058e-22	down	yes
Zm00001d051088	Zm00001d051088	Zm00001d051088_T001	GO:0004672(protein kinase activity);GO:0005515(protein binding);GO:0005524(ATP binding);GO:0006468(protein phosphorylation);GO:0016020(membrane);GO:0016021(integral component of membrane);GO:0016301(kinase activity);GO:0016310(phosphorylation)	NA	NA	NA	Putative leucine-rich repeat receptor-like protein kinase family protein	protein_coding	1.11063	23.662	20.6056	0.0001	0.0001	0.0001	151261	17.2067	3.86413e-24	3.77108e-22	up	yes
Zm00001d000524	Zm00001d000524	Zm00001d000524_T001	NA	NA	NA	NA		lincRNA	0.018785	0.082319	0.021563	7.87425	6.67249	9.79749	0.00503885	-7.63269	3.90655e-24	3.79507e-22	down	yes
Zm00001d039144	Zm00001d039144	Zm00001d039144_T002;Zm00001d039144_T001	GO:0005794(Golgi apparatus);GO:0005975(carbohydrate metabolic process);GO:0009834(plant-type secondary cell wall biogenesis);GO:0010411(xyloglucan metabolic process);GO:0016020(membrane);GO:0016021(integral component of membrane);GO:0016407(acetyltransferase activity);GO:0045492(xylan biosynthetic process);GO:1990937(xylan acetylation);GO:1990937(xylan acetylation)	NA	K03377	EC:2.3.1.45	Protein REDUCED WALL ACETYLATION 3	protein_coding	0.0001	0.0001	0.0001	2.3066	2.24258	1.51261	4.94904e-05	-14.3025	4.57041e-24	4.41979e-22	down	yes
Zm00001d002302	Zm00001d002302	Zm00001d002302_T005;Zm00001d002302_T014;Zm00001d002302_T008;Zm00001d002302_T003;Zm00001d002302_T002;Zm00001d002302_T001;Zm00001d002302_T006;Zm00001d002302_T015;Zm00001d002302_T004;Zm00001d002302_T011;Zm00001d002302_T010;Zm00001d002302_T013;Zm00001d002302_T007;Zm00001d002302_T009;Zm00001d002302_T012	GO:0009733(response to auxin);GO:0009733(response to auxin)	NA	NA	NA	Auxin responsive protein	protein_coding	1.41052	4.80415	3.97977	0.0001	0.0001	0.0292745	345.874	8.4341	5.0993e-24	4.90894e-22	up	yes
Zm00001d033077	Zm00001d033077	Zm00001d033077_T001	GO:0004222(metalloendopeptidase activity);GO:0005515(protein binding);GO:0006508(proteolysis);GO:0008233(peptidase activity);GO:0008237(metallopeptidase activity);GO:0016020(membrane);GO:0016021(integral component of membrane)	NA	NA	NA	Membrane metalloprotease ARASP chloroplastic	protein_coding	34.5194	47.7407	54.6172	3.73522	3.1885	3.82888	12.7297	3.67013	8.29205e-24	7.94655e-22	up	yes
Zm00001d016933	Zm00001d016933	Zm00001d016933_T001	NA	NA	NA	NA	loricrin-related	protein_coding	0.201191	0.479728	0.599539	7.96227	8.41602	11.7033	0.0455978	-4.45489	9.23807e-24	8.81345e-22	down	yes
Zm00001d019613	Zm00001d019613	Zm00001d019613_T001	GO:0008168(methyltransferase activity);GO:0008171(O-methyltransferase activity);GO:0008757(S-adenosylmethionine-dependent methyltransferase activity);GO:0016740(transferase activity);GO:0019438(aromatic compound biosynthetic process);GO:0032259(methylation)	NA	NA	NA	Probable O-methyltransferase 2	protein_coding	0.938409	0.964644	1.0473	25.4041	11.9921	29.6293	0.0440184	-4.50575	9.70271e-24	9.21541e-22	down	yes
Zm00001d047426	Zm00001d047426	Zm00001d047426_T006;Zm00001d047426_T009;Zm00001d047426_T003;Zm00001d047426_T005;Zm00001d047426_T011;Zm00001d047426_T010;Zm00001d047426_T012;Zm00001d047426_T001;Zm00001d047426_T004;Zm00001d047426_T008;Zm00001d047426_T007;Zm00001d047426_T013;Zm00001d047426_T014;Zm00001d047426_T002	GO:0000413(protein peptidyl-prolyl isomerization);GO:0003755(peptidyl-prolyl cis-trans isomerase activity);GO:0005515(protein binding);GO:0005528(FK506 binding);GO:0005737(cytoplasm);GO:0016853(isomerase activity);GO:0030154(cell differentiation);GO:0042761(very long-chain fatty acid biosynthetic process);GO:0061077(chaperone-mediated protein folding);GO:0099402(plant organ development);GO:009940…	NA	NA	NA	Peptidyl-prolyl cis-trans isomerase PASTICCINO1	protein_coding	3.64018	5.1966	4.20551	0.10325	0.194887	0.0548328	36.9501	5.20751	1.09297e-23	1.03347e-21	up	yes
Zm00001d037652	Zm00001d037652	Zm00001d037652_T002;Zm00001d037652_T001	GO:0004512(inositol-3-phosphate synthase activity);GO:0005737(cytoplasm);GO:0006021(inositol biosynthetic process);GO:0008654(phospholipid biosynthetic process);GO:0008654(phospholipid biosynthetic process)	NA	NA	NA	Inositol-3-phosphate synthase isozyme 1	protein_coding	0.384006	1.66964	0.5135	25.2936	20.9743	23.116	0.0369991	-4.75637	1.54246e-23	1.45203e-21	down	yes
Zm00001d040952	Zm00001d040952	Zm00001d040952_T001	GO:0003677(DNA binding);GO:0005634(nucleus)	NA	NA	NA	Expressed protein; protein	protein_coding	0.0001	0.0001	0.0001	2.79686	2.504	2.36873	3.91155e-05	-14.6419	2.20988e-23	2.07115e-21	down	yes
Zm00001d025253	Zm00001d025253	Zm00001d025253_T004;Zm00001d025253_T006;Zm00001d025253_T007;Zm00001d025253_T008;Zm00001d025253_T003;Zm00001d025253_T002;Zm00001d025253_T005;Zm00001d025253_T001	GO:0000166(nucleotide binding);GO:0004672(protein kinase activity);GO:0004674(protein serine/threonine kinase activity);GO:0004713(protein tyrosine kinase activity);GO:0005524(ATP binding);GO:0005886(plasma membrane);GO:0006468(protein phosphorylation);GO:0016020(membrane);GO:0016021(integral component of membrane);GO:0018108(peptidyl-tyrosine phosphorylation);GO:0018108(peptidyl-tyrosine phospho…	NA	NA	NA		protein_coding	1.29692	1.27686	0.581043	0.0001	0.0001	0.0001	10516.1	13.3603	2.39336e-23	2.23328e-21	up	yes
Zm00001d010387	Zm00001d010387	Zm00001d010387_T001	GO:0005829(cytosol);GO:0005840(ribosome);GO:0006545(glycine biosynthetic process);GO:0006567(threonine catabolic process);GO:0008732(L-allo-threonine aldolase activity)	NA	NA	NA	40S ribosomal protein S4-3	protein_coding	3.17917	4.30091	3.92008	0.0001	0.0001	0.0001	38000.5	15.2137	2.524e-23	2.3449e-21	up	yes
Zm00001d018696	Zm00001d018696	Zm00001d018696_T001	GO:0004322(ferroxidase activity);GO:0005507(copper ion binding);GO:0005886(plasma membrane);GO:0006826(iron ion transport);GO:0009505(plant-type cell wall);GO:0009506(plasmodesma);GO:0016491(oxidoreductase activity);GO:0016722(oxidoreductase activity, oxidizing metal ions);GO:0055072(iron ion homeostasis);GO:0055114(oxidation-reduction process)	NA	NA	NA	SKU5 similar 17	protein_coding	6.57092	7.56674	10.9328	0.127524	0.383397	0.235443	33.5901	5.06996	3.71868e-23	3.43978e-21	up	yes
Zm00001d012323	Zm00001d012323	Zm00001d012323_T001;Zm00001d012323_T002;Zm00001d012323_T003	GO:0005730(nucleolus);GO:0005730(nucleolus)	NA	NA	NA		protein_coding	2.70615	3.18079	2.3281	0.0001	0.0001	0.0001	27383.5	14.741	4.82662e-23	4.4453e-21	up	yes
Zm00001d031303	Zm00001d031303	Zm00001d031303_T001;Zm00001d031303_T005;Zm00001d031303_T002;Zm00001d031303_T007;Zm00001d031303_T003;Zm00001d031303_T008;Zm00001d031303_T009;Zm00001d031303_T006;Zm00001d031303_T004	GO:0003824(catalytic activity);GO:0010325(raffinose family oligosaccharide biosynthetic process);GO:0016740(transferase activity);GO:0016757(transferase activity, transferring glycosyl groups);GO:0016757(transferase activity, transferring glycosyl groups)	00052(Galactose metabolism);00052(Galactose metabolism)	K06617	EC:2.4.1.82	Probable galactinol--sucrose galactosyltransferase 1	protein_coding	26.8908	35.1504	23.3249	0.847211	1.94573	0.911299	23.0455	4.52641	5.07632e-23	4.65512e-21	up	yes
Zm00001d014015	Zm00001d014015	Zm00001d014015_T001	GO:0005338(nucleotide-sugar transmembrane transporter activity);GO:0005464(UDP-xylose transmembrane transporter activity);GO:0005794(Golgi apparatus);GO:0008643(carbohydrate transport);GO:0015297(antiporter activity);GO:0015790(UDP-xylose transmembrane transport);GO:0015931(nucleobase-containing compound transport);GO:0016020(membrane);GO:0016021(integral component of membrane);GO:0022857(transme…	NA	NA	NA	Nucleotide/sugar transporter family protein	protein_coding	0.0001	0.0001	0.0001	7.4396	18.1947	8.60578	8.76167e-06	-16.8004	5.21303e-23	4.75996e-21	down	yes
Zm00001d018420	Zm00001d018420	Zm00001d018420_T011;Zm00001d018420_T005;Zm00001d018420_T001;Zm00001d018420_T002;Zm00001d018420_T009;Zm00001d018420_T008;Zm00001d018420_T003;Zm00001d018420_T007	GO:0004672(protein kinase activity);GO:0005524(ATP binding);GO:0006468(protein phosphorylation);GO:0016301(kinase activity);GO:0016310(phosphorylation);GO:0016310(phosphorylation)	NA	NA	NA	Protein kinase superfamily protein	protein_coding	0.918106	1.1252	1.06758	10.5946	11.4428	11.6919	0.0922312	-3.4386	5.54281e-23	5.03945e-21	down	yes
Zm00001d002481	Zm00001d002481	Zm00001d002481_T002;Zm00001d002481_T005;Zm00001d002481_T001;Zm00001d002481_T006;Zm00001d002481_T003;Zm00001d002481_T004	GO:0000166(nucleotide binding);GO:0004672(protein kinase activity);GO:0004674(protein serine/threonine kinase activity);GO:0005524(ATP binding);GO:0006468(protein phosphorylation);GO:0016301(kinase activity);GO:0016310(phosphorylation);GO:0016310(phosphorylation)	NA	K04733	EC:2.7.11.1	tyrosine kinase family protein	protein_coding	0.0001	0.0001	0.0001	1.26009	1.13045	1.44306	7.82553e-05	-13.6415	6.12916e-23	5.54885e-21	down	yes
Zm00001d041915	Zm00001d041915	Zm00001d041915_T002;Zm00001d041915_T006;Zm00001d041915_T001;Zm00001d041915_T004;Zm00001d041915_T005;Zm00001d041915_T003	GO:0004386(helicase activity);GO:0016020(membrane);GO:0016021(integral component of membrane);GO:0016021(integral component of membrane)	NA	NA	NA	Helicase	protein_coding	0.881422	0.508626	1.02496	0.0001	0.0001	0.0001	8050.04	12.9748	6.33238e-23	5.70853e-21	up	yes
Zm00001d022836	Zm00001d022836	Zm00001d022836_T001	NA	NA	NA	NA		lincRNA	0.0001	0.0001	0.0001	6.17761	13.6888	5.40242	1.18723e-05	-16.362	8.05985e-23	7.23516e-21	down	yes
Zm00001d042955	Zm00001d042955	Zm00001d042955_T001;Zm00001d042955_T002	GO:0003779(actin binding);GO:0003779(actin binding)	NA	NA	NA	Protein NETWORKED 2D	protein_coding	0.038256	0.167288	0.08771	3.77368	2.9764	3.84173	0.0276869	-5.17465	1.2653e-22	1.12753e-20	down	yes
Zm00001d038722	Zm00001d038722	Zm00001d038722_T001	NA	NA	NA	NA		protein_coding	0.0001	0.036627	0.0001	4.18817	5.07242	4.19411	0.00273711	-8.51313	1.26665e-22	1.12753e-20	down	yes
Zm00001d031559	Zm00001d031559	Zm00001d031559_T001;Zm00001d031559_T002	GO:0008299(isoprenoid biosynthetic process);GO:0016853(isomerase activity);GO:0030145(manganese ion binding);GO:0030604(1-deoxy-D-xylulose-5-phosphate reductoisomerase activity);GO:0046872(metal ion binding);GO:0051484(isopentenyl diphosphate biosynthetic process, methylerythritol 4-phosphate pathway involved in terpenoid biosynthetic process);GO:0055114(oxidation-reduction process);GO:0070402(NA…	NA	NA	NA	1-deoxy-D-xylulose 5-phosphate reductoisomerase chloroplastic	protein_coding	0.0001	0.0001	0.0001	7.71435	8.60611	14.5202	9.72742e-06	-16.6495	1.27214e-22	1.12769e-20	down	yes
Zm00001d032222	Zm00001d032222	Zm00001d032222_T001;Zm00001d032222_T002	GO:0008194(UDP-glycosyltransferase activity);GO:0016740(transferase activity);GO:0016757(transferase activity, transferring glycosyl groups);GO:0016758(transferase activity, transferring hexosyl groups);GO:0043231(intracellular membrane-bounded organelle);GO:0080043(quercetin 3-O-glucosyltransferase activity);GO:0080044(quercetin 7-O-glucosyltransferase activity);GO:0080044(quercetin 7-O-glucosyl…	NA	NA	NA	UDP-glycosyltransferase 85A7	protein_coding	29.2947	48.9331	38.4938	3.58821	3.74937	3.0812	11.203	3.48581	1.35912e-22	1.1998e-20	up	yes
Zm00001d021363	Zm00001d021363	Zm00001d021363_T001;Zm00001d021363_T002	GO:0016020(membrane);GO:0016021(integral component of membrane);GO:0016021(integral component of membrane)	NA	NA	NA	SNARE associated Golgi protein family	protein_coding	0.0001	0.0001	0.0001	3.61813	2.16661	4.02085	3.05948e-05	-14.9964	1.42665e-22	1.25422e-20	down	yes
Zm00001d035715	Zm00001d035715	Zm00001d035715_T001;Zm00001d035715_T003;Zm00001d035715_T002;Zm00001d035715_T004	NA	NA	NA	NA		protein_coding	1.61093	2.39681	1.66054	0.0001	0.0001	0.0001	18894.2	14.2057	1.63579e-22	1.42953e-20	up	yes
Zm00001d014616	Zm00001d014616	Zm00001d014616_T017;Zm00001d014616_T002;Zm00001d014616_T035;Zm00001d014616_T003;Zm00001d014616_T011;Zm00001d014616_T005;Zm00001d014616_T030;Zm00001d014616_T001;Zm00001d014616_T032;Zm00001d014616_T028;Zm00001d014616_T014;Zm00001d014616_T022;Zm00001d014616_T019;Zm00001d014616_T013;Zm00001d014616_T024;Zm00001d014616_T009;Zm00001d014616_T012;Zm00001d014616_T027;Zm00001d014616_T023;Zm00001d014616_T008…	GO:0005096(GTPase activator activity);GO:0005737(cytoplasm);GO:0005886(plasma membrane);GO:0017137(Rab GTPase binding);GO:0017157(regulation of exocytosis);GO:0019905(syntaxin binding);GO:0043547(positive regulation of GTPase activity);GO:0045159(myosin II binding);GO:0045454(cell redox homeostasis);GO:0045454(cell redox homeostasis)	NA	NA	NA	transducin family protein / WD-40 repeat family protein	protein_coding	0.0118268	0.0001	0.0001	1.25928	1.52354	2.25325	0.00238814	-8.7099	1.6395e-22	1.42953e-20	down	yes
Zm00001d012413	Zm00001d012413	Zm00001d012413_T001	GO:0003677(DNA binding);GO:0003700(DNA-binding transcription factor activity);GO:0005634(nucleus);GO:0006355(regulation of transcription, DNA-templated);GO:0043565(sequence-specific DNA binding)	NA	NA	NA	Probable WRKY transcription factor 49	protein_coding	1.09505	1.36881	0.71198	0.0001	0.0001	0.0001	10586.1	13.3699	1.78806e-22	1.55269e-20	up	yes
Zm00001d013536	Zm00001d013536	Zm00001d013536_T002;Zm00001d013536_T001	GO:0016020(membrane);GO:0016021(integral component of membrane);GO:0016021(integral component of membrane)	NA	NA	NA	HPP	protein_coding	3.36465	2.66461	2.31609	40.641	50.8184	56.7476	0.0563087	-4.1505	2.07105e-22	1.79112e-20	down	yes
Zm00001d047351	Zm00001d047351	Zm00001d047351_T002;Zm00001d047351_T003;Zm00001d047351_T001	NA	NA	NA	NA	PLAC8 family protein	protein_coding	6.71826	10.4538	10.132	0.14075	0.146401	0.357338	42.3656	5.40482	2.39638e-22	2.06409e-20	up	yes
Zm00001d021845	Zm00001d021845	Zm00001d021845_T001	NA	NA	NA	NA		protein_coding	0.0001	0.0001	0.0001	8.97738	6.67973	10.6859	1.13882e-05	-16.4221	2.49733e-22	2.14237e-20	down	yes
Zm00001d004388	Zm00001d004388	Zm00001d004388_T001	GO:0004497(monooxygenase activity);GO:0004499(N,N-dimethylaniline monooxygenase activity);GO:0016491(oxidoreductase activity);GO:0050660(flavin adenine dinucleotide binding);GO:0050661(NADP binding);GO:0055114(oxidation-reduction process)	NA	NA	NA	Probable flavin-containing monooxygenase 1	protein_coding	0.0001	0.0001	0.0001	9.73117	10.923	8.07856	1.04411e-05	-16.5474	2.62719e-22	2.24472e-20	down	yes
Zm00001d020479	Zm00001d020479	Zm00001d020479_T003;Zm00001d020479_T008;Zm00001d020479_T009;Zm00001d020479_T005;Zm00001d020479_T004;Zm00001d020479_T001;Zm00001d020479_T006;Zm00001d020479_T007;Zm00001d020479_T002	GO:0003743(translation initiation factor activity);GO:0005634(nucleus);GO:0005737(cytoplasm);GO:0005852(eukaryotic translation initiation factor 3 complex);GO:0006413(translational initiation);GO:0006413(translational initiation)	NA	NA	NA	Eukaryotic translation initiation factor 3 subunit E	protein_coding	0.585199	1.80855	1.05794	0.0001	0.0001	0.0001	11505.6	13.4901	2.81908e-22	2.39904e-20	up	yes
Zm00001d041389	Zm00001d041389	Zm00001d041389_T003;Zm00001d041389_T001;Zm00001d041389_T007;Zm00001d041389_T011;Zm00001d041389_T002;Zm00001d041389_T004;Zm00001d041389_T008;Zm00001d041389_T009;Zm00001d041389_T014;Zm00001d041389_T010;Zm00001d041389_T005;Zm00001d041389_T006;Zm00001d041389_T013;Zm00001d041389_T012;Zm00001d041389_T015	GO:0003743(translation initiation factor activity);GO:0006413(translational initiation);GO:0006413(translational initiation)	NA	NA	NA	RNA polymerase I specific transcription initiation factor RRN3 protein	protein_coding	0.0001	0.0001	0.0001	2.20866	1.4224	1.76413	5.5605e-05	-14.1344	2.86302e-22	2.42672e-20	down	yes
Zm00001d010393	Zm00001d010393	Zm00001d010393_T001	NA	NA	NA	NA	Putative CRAL/TRIO domain containing%2C Sec14p-like phosphatidylinositol transfer family protein	protein_coding	0.0001	0.0001	0.0001	2.69076	2.93868	2.59932	3.64575e-05	-14.7434	2.94834e-22	2.48913e-20	down	yes
Zm00001d025875	Zm00001d025875	Zm00001d025875_T001	GO:0016020(membrane);GO:0016021(integral component of membrane)	NA	NA	NA		protein_coding	1.53562	4.79875	3.75184	0.0001	0.025951	0.0001	385.691	8.5913	3.38342e-22	2.84515e-20	up	yes
Zm00001d025116	Zm00001d025116	Zm00001d025116_T001	GO:0009694(jasmonic acid metabolic process);GO:0009696(salicylic acid metabolic process);GO:0016787(hydrolase activity);GO:0080030(methyl indole-3-acetate esterase activity);GO:0080031(methyl salicylate esterase activity);GO:0080032(methyl jasmonate esterase activity)	NA	NA	NA	Methylesterase 3	protein_coding	0.0001	0.107318	0.0001	6.83866	7.23179	6.59936	0.00520169	-7.5868	3.72391e-22	3.11914e-20	down	yes
Zm00001d015242	Zm00001d015242	Zm00001d015242_T002;Zm00001d015242_T003;Zm00001d015242_T005;Zm00001d015242_T001;Zm00001d015242_T006	NA	NA	NA	NA	AIG2-like protein	protein_coding	7.12416	4.09887	3.81069	0.0633353	0.0182093	0.0001	184.136	7.52463	6.5356e-22	5.45274e-20	up	yes
Zm00001d006885	Zm00001d006885	Zm00001d006885_T001;Zm00001d006885_T002;Zm00001d006885_T003;Zm00001d006885_T004	GO:0004672(protein kinase activity);GO:0004683(calmodulin-dependent protein kinase activity);GO:0005516(calmodulin binding);GO:0005524(ATP binding);GO:0005634(nucleus);GO:0005737(cytoplasm);GO:0006468(protein phosphorylation);GO:0009738(abscisic acid-activated signaling pathway);GO:0009931(calcium-dependent protein serine/threonine kinase activity);GO:0016301(kinase activity);GO:0016310(phosphory…	NA	NA	NA	CDPK-related kinase 5	protein_coding	6.77896	12.588	10.7887	0.839586	0.883263	0.627517	12.8302	3.68147	6.67131e-22	5.54422e-20	up	yes
Zm00001d007745	Zm00001d007745	Zm00001d007745_T001	GO:0004672(protein kinase activity);GO:0004674(protein serine/threonine kinase activity);GO:0005509(calcium ion binding);GO:0005524(ATP binding);GO:0005886(plasma membrane);GO:0006468(protein phosphorylation);GO:0007166(cell surface receptor signaling pathway);GO:0016020(membrane);GO:0016021(integral component of membrane);GO:0016301(kinase activity);GO:0016310(phosphorylation);GO:0030247(polysac…	NA	NA	NA	S-receptor kinase1	protein_coding	0.878325	5.3359	2.50585	0.0001	0.0001	0.0001	29066.9	14.8271	6.70602e-22	5.55139e-20	up	yes
Zm00001d007345	Zm00001d007345	Zm00001d007345_T001	GO:0016020(membrane);GO:0016021(integral component of membrane);GO:0016491(oxidoreductase activity);GO:0055114(oxidation-reduction process)	NA	K22418	1.1.1.-;EC:1.1.1.146	11-beta-hydroxysteroid dehydrogenase-like 5	protein_coding	28.5069	21.0448	24.356	1.63451	1.64929	1.93033	14.1745	3.82523	6.8955e-22	5.68612e-20	up	yes
Zm00001d012823	HSF-transcription factor 22	Zm00001d012823_T001	GO:0000978(RNA polymerase II cis-regulatory region sequence-specific DNA binding);GO:0003677(DNA binding);GO:0003700(DNA-binding transcription factor activity);GO:0005634(nucleus);GO:0006355(regulation of transcription, DNA-templated);GO:0034605(cellular response to heat);GO:0042025(host cell nucleus);GO:0043565(sequence-specific DNA binding);GO:0043618(regulation of transcription from RNA polyme…	NA	NA	NA	Heat stress transcription factor A-1a	protein_coding	0.19821	0.124811	0.142375	5.9016	5.41216	6.29943	0.0264232	-5.24205	7.06003e-22	5.79931e-20	down	yes
Zm00001d012953	Zm00001d012953	Zm00001d012953_T001	GO:0006857(oligopeptide transport);GO:0015333(peptide:proton symporter activity);GO:0016020(membrane);GO:0016021(integral component of membrane);GO:0022857(transmembrane transporter activity);GO:0035672(oligopeptide transmembrane transport);GO:0035673(oligopeptide transmembrane transporter activity);GO:0055085(transmembrane transport);GO:1902600(proton transmembrane transport);GO:1904680(peptide …	NA	NA	NA	Protein NRT1/ PTR FAMILY 5.6	protein_coding	0.565524	1.09487	1.4586	13.4104	13.5443	13.0923	0.0778835	-3.68254	7.42693e-22	6.07723e-20	down	yes
Zm00001d052076	Zm00001d052076	Zm00001d052076_T018;Zm00001d052076_T022;Zm00001d052076_T006;Zm00001d052076_T016;Zm00001d052076_T013;Zm00001d052076_T017;Zm00001d052076_T010;Zm00001d052076_T012;Zm00001d052076_T019;Zm00001d052076_T021;Zm00001d052076_T004;Zm00001d052076_T008;Zm00001d052076_T007;Zm00001d052076_T002;Zm00001d052076_T011;Zm00001d052076_T015;Zm00001d052076_T001;Zm00001d052076_T014;Zm00001d052076_T005;Zm00001d052076_T020…	GO:0005886(plasma membrane);GO:0009506(plasmodesma);GO:0009506(plasmodesma)	NA	NA	NA	Tetraspanin-2	protein_coding	0.0001	0.0239106	0.0001	1.95598	2.38533	0.995003	0.00451821	-7.79003	7.52821e-22	6.1365e-20	down	yes
Zm00001d002392	Zm00001d002392	Zm00001d002392_T001	NA	NA	NA	NA		protein_coding	0.0001	0.0001	0.0001	3.77783	2.44986	9.62284	1.89268e-05	-15.6892	7.99764e-22	6.49427e-20	down	yes
Zm00001d043750	Zm00001d043750	Zm00001d043750_T002;Zm00001d043750_T001	GO:0008168(methyltransferase activity);GO:0008168(methyltransferase activity)	NA	NA	NA	CMV 1a interacting protein 1	protein_coding	10.901	8.83659	8.25116	0.0001	0.112725	0.0001	247.853	7.95334	8.89962e-22	7.19922e-20	up	yes
Zm00001d046491	Zm00001d046491	Zm00001d046491_T001	GO:0016491(oxidoreductase activity);GO:0055114(oxidation-reduction process)	NA	NA	NA	Putative alcohol dehydrogenase superfamily protein	protein_coding	0.785654	0.610124	0.262527	14.3238	16.8706	16.3179	0.0349026	-4.84052	1.13961e-21	9.18382e-20	down	yes
Zm00001d045839	Zm00001d045839	Zm00001d045839_T001	GO:0002229(defense response to oomycetes);GO:0004672(protein kinase activity);GO:0004675(transmembrane receptor protein serine/threonine kinase activity);GO:0005524(ATP binding);GO:0005886(plasma membrane);GO:0006468(protein phosphorylation);GO:0006952(defense response);GO:0007178(transmembrane receptor protein serine/threonine kinase signaling pathway);GO:0016020(membrane);GO:0016021(integral co…	NA	NA	NA	Putative lectin-like receptor protein kinase family protein	protein_coding	0.031835	0.130557	0.203153	5.51998	5.16463	6.5649	0.0211916	-5.56036	1.29299e-21	1.03805e-19	down	yes
Zm00001d043544	Zm00001d043544	Zm00001d043544_T005;Zm00001d043544_T002;Zm00001d043544_T004;Zm00001d043544_T003;Zm00001d043544_T001	GO:0008194(UDP-glycosyltransferase activity);GO:0016740(transferase activity);GO:0016757(transferase activity, transferring glycosyl groups);GO:0016758(transferase activity, transferring hexosyl groups);GO:0043231(intracellular membrane-bounded organelle);GO:0043231(intracellular membrane-bounded organelle)	NA	NA	NA	UDP-glycosyltransferase 88A1	protein_coding	0.0176819	0.0332147	0.00697579	1.05475	1.82001	1.12811	0.0144577	-6.11202	1.44718e-21	1.15747e-19	down	yes
Zm00001d003279	Zm00001d003279	Zm00001d003279_T001	GO:0010325(raffinose family oligosaccharide biosynthetic process);GO:0016740(transferase activity);GO:0016757(transferase activity, transferring glycosyl groups)	NA	NA	NA	Probable galactinol--sucrose galactosyltransferase 2	protein_coding	12.2423	7.31461	6.42126	0.0001	0.0001	0.0001	86593.7	16.402	1.50645e-21	1.20036e-19	up	yes
Zm00001d027120	Zm00001d027120	Zm00001d027120_T001	NA	NA	NA	NA		lincRNA	3.1031	12.9035	15.4204	0.0001	0.0001	0.0001	104757	16.6767	1.51591e-21	1.2034e-19	up	yes
Zm00001d027758	Zm00001d027758	Zm00001d027758_T003;Zm00001d027758_T002;Zm00001d027758_T001	GO:0016020(membrane);GO:0016021(integral component of membrane);GO:0016021(integral component of membrane)	NA	NA	NA		protein_coding	0.0001	0.0001	0.0001	1.22269	1.99056	1.31976	6.61811e-05	-13.8832	1.77449e-21	1.40343e-19	down	yes
Zm00001d008525	Zm00001d008525	Zm00001d008525_T001	GO:0000032(cell wall mannoprotein biosynthetic process);GO:0004476(mannose-6-phosphate isomerase activity);GO:0005829(cytosol);GO:0005975(carbohydrate metabolic process);GO:0006486(protein glycosylation);GO:0008270(zinc ion binding);GO:0009298(GDP-mannose biosynthetic process);GO:0016853(isomerase activity)	NA	NA	NA	Mannose-6-phosphate isomerase 1	protein_coding	11.416	12.6732	14.9934	0.737835	0.57938	0.46034	21.9868	4.45856	1.99267e-21	1.57015e-19	up	yes
Zm00001d045132	Zm00001d045132	Zm00001d045132_T001	GO:0004038(allantoinase activity);GO:0005737(cytoplasm);GO:0006145(purine nucleobase catabolic process)	NA	NA	NA	Allantoinase	protein_coding	0.0001	0.0001	0.0001	4.44125	6.40355	11.3409	1.35222e-05	-16.1743	2.06777e-21	1.62331e-19	down	yes
Zm00001d003796	Zm00001d003796	Zm00001d003796_T003;Zm00001d003796_T005;Zm00001d003796_T002;Zm00001d003796_T004;Zm00001d003796_T001	GO:0000226(microtubule cytoskeleton organization);GO:0005813(centrosome);GO:0005819(spindle);GO:0030865(cortical cytoskeleton organization);GO:0035303(regulation of dephosphorylation);GO:0035303(regulation of dephosphorylation)	NA	NA	NA	Probable serine/threonine-protein phosphatase 2A regulatory subunit B'' subunit TON2	protein_coding	1.62136	6.00856	3.60484	70.5979	47.0055	59.7994	0.0633291	-3.98099	2.86629e-21	2.24192e-19	down	yes
Zm00001d001022	Zm00001d001022	Zm00001d001022_T001	NA	NA	NA	NA		lincRNA	3.06341	3.10243	3.65236	0.0001	0.0001	0.0001	32727.3	14.9982	2.96751e-21	2.31259e-19	up	yes
Zm00001d004573	Zm00001d004573	Zm00001d004573_T002;Zm00001d004573_T001	GO:0000166(nucleotide binding);GO:0000723(telomere maintenance);GO:0003678(DNA helicase activity);GO:0004386(helicase activity);GO:0005524(ATP binding);GO:0006281(DNA repair);GO:0006310(DNA recombination);GO:0006974(cellular response to DNA damage stimulus);GO:0016787(hydrolase activity);GO:0017148(negative regulation of translation);GO:0030598(rRNA N-glycosylase activity);GO:0032508(DNA duplex u…	NA	NA	NA	60 kDa jasmonate-induced protein	protein_coding	8.75737	13.7082	14.1595	1.01215	0.412264	0.567918	18.383	4.2003	3.25192e-21	2.52499e-19	up	yes
Zm00001d006397	Zm00001d006397	Zm00001d006397_T001	GO:0008194(UDP-glycosyltransferase activity);GO:0016740(transferase activity);GO:0016757(transferase activity, transferring glycosyl groups);GO:0016758(transferase activity, transferring hexosyl groups);GO:0043231(intracellular membrane-bounded organelle)	NA	NA	NA	UDP-glycosyltransferase 85A7	protein_coding	50.5984	84.4883	91.6171	6.82994	3.02084	2.98895	17.6564	4.14212	3.65103e-21	2.82457e-19	up	yes
Zm00001d021529	Zm00001d021529	Zm00001d021529_T001;Zm00001d021529_T002	NA	NA	NA	NA	Protein C2-DOMAIN ABA-RELATED 4	protein_coding	40.5841	58.839	53.8486	3.45154	4.70316	5.29037	11.3998	3.51094	3.692e-21	2.84592e-19	up	yes
Zm00001d053226	Zm00001d053226	Zm00001d053226_T001	GO:0008168(methyltransferase activity)	NA	NA	NA	CMV 1a interacting protein 1	protein_coding	3.32893	5.01763	4.15903	0.0001	0.0001	0.0001	41685.3	15.3473	3.76203e-21	2.88943e-19	up	yes
Zm00001d046754	Zm00001d046754	Zm00001d046754_T001;Zm00001d046754_T002	NA	NA	NA	NA		protein_coding	0.0001	0.0001	0.0001	2.97408	2.44211	4.33658	3.07605e-05	-14.9886	3.9e-21	2.98462e-19	down	yes
Zm00001d034555	Zm00001d034555	Zm00001d034555_T023;Zm00001d034555_T024;Zm00001d034555_T014;Zm00001d034555_T003;Zm00001d034555_T011;Zm00001d034555_T021;Zm00001d034555_T006;Zm00001d034555_T037;Zm00001d034555_T029;Zm00001d034555_T063;Zm00001d034555_T004;Zm00001d034555_T018;Zm00001d034555_T020;Zm00001d034555_T001;Zm00001d034555_T064;Zm00001d034555_T026;Zm00001d034555_T009;Zm00001d034555_T013;Zm00001d034555_T062;Zm00001d034555_T022…	GO:0000166(nucleotide binding);GO:0004672(protein kinase activity);GO:0005524(ATP binding);GO:0006468(protein phosphorylation);GO:0006952(defense response);GO:0016301(kinase activity);GO:0016310(phosphorylation);GO:0043531(ADP binding);GO:0043531(ADP binding)	NA	NA	NA	Disease resistance protein RPM1	protein_coding	0.0208279	0.181999	0.0542034	3.25414	2.80821	3.63172	0.0265142	-5.23709	4.14975e-21	3.16437e-19	down	yes
Zm00001d034537	Zm00001d034537	Zm00001d034537_T007;Zm00001d034537_T001;Zm00001d034537_T009;Zm00001d034537_T004;Zm00001d034537_T005;Zm00001d034537_T008;Zm00001d034537_T002;Zm00001d034537_T003;Zm00001d034537_T006	GO:0003676(nucleic acid binding);GO:0016020(membrane);GO:0016021(integral component of membrane);GO:0016021(integral component of membrane)	NA	NA	NA		protein_coding	0.744453	1.01969	0.476078	0.0001	0.0001	0.0001	7467.42	12.8664	4.49582e-21	3.41602e-19	up	yes
Zm00001d032921	Zm00001d032921	Zm00001d032921_T002;Zm00001d032921_T003;Zm00001d032921_T001	GO:0005085(guanyl-nucleotide exchange factor activity);GO:0007264(small GTPase mediated signal transduction);GO:0016491(oxidoreductase activity);GO:0055114(oxidation-reduction process);GO:0055114(oxidation-reduction process)	NA	NA	NA		protein_coding	0.0001	0.022589	0.0001	4.11411	2.76335	1.68417	0.00266176	-8.5534	5.66447e-21	4.28867e-19	down	yes
ZeamMp134	ZeamMp134	ZeamMp134	NA	NA	NA	NA	rbcL-ct	pseudogene	1166.55	193.382	84.2328	0.490365	0.329995	0.492942	1099.64	10.1028	5.73967e-21	4.3302e-19	up	yes
Zm00001d050480	Zm00001d050480	Zm00001d050480_T001	GO:0005794(Golgi apparatus);GO:0016740(transferase activity)	NA	NA	NA	Probable galacturonosyltransferase-like 9	protein_coding	0.0001	0.0001	0.0001	6.93587	6.74154	5.17241	1.59153e-05	-15.9392	6.39045e-21	4.80413e-19	down	yes
Zm00001d039859	metallothionein3	Zm00001d039859_T001;Zm00001d039859_T002	GO:0046872(metal ion binding);GO:0046872(metal ion binding)	NA	NA	NA	Metallothionein-like protein type 2	protein_coding	2.30901	2.1857	1.15297	85.9973	36.24	34.9284	0.0359346	-4.79848	6.6167e-21	4.9567e-19	down	yes
Zm00001d053046	Zm00001d053046	Zm00001d053046_T001	NA	NA	NA	NA		protein_coding	6.09429	9.79853	9.32823	0.088752	0.033011	0.037055	158.805	7.31111	6.83448e-21	5.10188e-19	up	yes
Zm00001d033556	Zm00001d033556	Zm00001d033556_T007;Zm00001d033556_T009;Zm00001d033556_T001;Zm00001d033556_T002;Zm00001d033556_T010;Zm00001d033556_T012;Zm00001d033556_T004;Zm00001d033556_T005;Zm00001d033556_T011;Zm00001d033556_T003;Zm00001d033556_T008	GO:0000139(Golgi membrane);GO:0005794(Golgi apparatus);GO:0016020(membrane);GO:0016021(integral component of membrane);GO:0016740(transferase activity);GO:0016757(transferase activity, transferring glycosyl groups);GO:0045489(pectin biosynthetic process);GO:0047262(polygalacturonate 4-alpha-galacturonosyltransferase activity);GO:0071555(cell wall organization);GO:0071555(cell wall organization)	00520(Amino sugar and nucleotide sugar metabolism);00520(Amino sugar and nucleotide sugar metabolism)	K13648	EC:2.4.1.43	Polygalacturonate 4-alpha-galacturonosyltransferase	protein_coding	1.00359	1.43911	1.10707	11.864	10.7375	11.8993	0.102889	-3.28083	7.14418e-21	5.31442e-19	down	yes
Zm00001d003811	Zm00001d003811	Zm00001d003811_T001	GO:0000160(phosphorelay signal transduction system);GO:0005622(intracellular)	NA	NA	NA	Two-component response regulator-like APRR1	protein_coding	0.0001	0.0001	0.0001	3.73063	3.55346	4.48442	2.54917e-05	-15.2596	8.0106e-21	5.93817e-19	down	yes
Zm00001d026083	Zm00001d026083	Zm00001d026083_T001	GO:0004497(monooxygenase activity);GO:0005506(iron ion binding);GO:0007275(multicellular organism development);GO:0010268(brassinosteroid homeostasis);GO:0016020(membrane);GO:0016021(integral component of membrane);GO:0016125(sterol metabolic process);GO:0016132(brassinosteroid biosynthetic process);GO:0016491(oxidoreductase activity);GO:0016705(oxidoreductase activity, acting on paired donors, w…	NA	NA	NA	Putative cytochrome P450 superfamily protein	protein_coding	10.8416	10.4703	4.035	0.034292	0.0001	0.102307	185.422	7.53467	1.01412e-20	7.49147e-19	up	yes
Zm00001d039914	Zm00001d039914	Zm00001d039914_T001	GO:0046872(metal ion binding)	NA	NA	NA	Metallothionein-like protein type 2	protein_coding	226.387	284.366	295.278	26.7969	23.5816	24.7461	10.7293	3.42348	1.20596e-20	8.8778e-19	up	yes
Zm00001d047736	asparagine synthetase4	Zm00001d047736_T001	GO:0000166(nucleotide binding);GO:0004066(asparagine synthase (glutamine-hydrolyzing) activity);GO:0005524(ATP binding);GO:0005829(cytosol);GO:0006529(asparagine biosynthetic process);GO:0042803(protein homodimerization activity)	NA	NA	NA	asparagine synthetase4	protein_coding	8.29782	15.4868	26.7008	0.0001	0.112499	0.0001	447.967	8.80725	1.38356e-20	1.01501e-18	up	yes
Zm00001d043485	Zm00001d043485	Zm00001d043485_T001	NA	NA	NA	NA	Transposon protein Pong sub-class [Source:UniProtKB/TrEMBL;Acc:B4FSZ0]	protein_coding	0.0001	0.0001	0.0001	3.38615	2.2746	1.69823	4.07665e-05	-14.5823	1.43241e-20	1.04724e-18	down	yes
Zm00001d015291	Zm00001d015291	Zm00001d015291_T002;Zm00001d015291_T003;Zm00001d015291_T001	GO:0004672(protein kinase activity);GO:0005515(protein binding);GO:0005524(ATP binding);GO:0006468(protein phosphorylation);GO:0016020(membrane);GO:0016021(integral component of membrane);GO:0016301(kinase activity);GO:0016310(phosphorylation);GO:0016310(phosphorylation)	NA	NA	NA	Probable LRR receptor-like serine/threonine-protein kinase	protein_coding	2.72526	12.6198	5.98406	0.301854	0.18967	0.131295	34.2461	5.09787	1.52536e-20	1.11137e-18	up	yes
Zm00001d012955	Zm00001d012955	Zm00001d012955_T001	GO:0000774(adenyl-nucleotide exchange factor activity);GO:0005737(cytoplasm);GO:0005783(endoplasmic reticulum);GO:0050790(regulation of catalytic activity)	04141(Protein processing in endoplasmic reticulum)	K09562	NA	Fes1A	protein_coding	0.0001	0.030905	0.0001	3.48871	2.69421	3.4602	0.00322562	-8.27621	1.60549e-20	1.16576e-18	down	yes
Zm00001d026721	Zm00001d026721	Zm00001d026721_T001	NA	NA	NA	NA		lincRNA	5.00143	7.23081	6.16542	0.0001	0.0001	0.0001	61325.6	15.9042	2.01544e-20	1.45845e-18	up	yes
Zm00001d044104	Zm00001d044104	Zm00001d044104_T001	GO:0003854(3-beta-hydroxy-delta5-steroid dehydrogenase activity);GO:0006694(steroid biosynthetic process);GO:0016491(oxidoreductase activity);GO:0016616(oxidoreductase activity, acting on the CH-OH group of donors, NAD or NADP as acceptor);GO:0055114(oxidation-reduction process)	NA	NA	NA	NAD(P)-binding Rossmann-fold superfamily protein	protein_coding	1.18283	1.21708	0.641819	20.4773	16.4822	13.1963	0.0606457	-4.04345	2.42849e-20	1.7514e-18	down	yes
Zm00001d003471	Zm00001d003471	Zm00001d003471_T001	GO:0005351(carbohydrate:proton symporter activity);GO:0005355(glucose transmembrane transporter activity);GO:0005887(integral component of plasma membrane);GO:0008643(carbohydrate transport);GO:0008645(hexose transmembrane transport);GO:0016020(membrane);GO:0016021(integral component of membrane);GO:0022857(transmembrane transporter activity);GO:0046323(glucose import);GO:0055085(transmembrane tr…	NA	NA	NA	Sugar transport protein 5	protein_coding	0.324612	0.459683	0.508292	7.80825	6.15983	9.34694	0.0554401	-4.17293	2.69153e-20	1.93454e-18	down	yes
Zm00001d050038	Zm00001d050038	Zm00001d050038_T002;Zm00001d050038_T001;Zm00001d050038_T003	GO:0003729(mRNA binding);GO:0016020(membrane);GO:0016021(integral component of membrane);GO:0046872(metal ion binding);GO:0046872(metal ion binding)	NA	NA	NA		protein_coding	5.14701	5.60782	6.88868	0.0001	0.0001	0.0001	58811.7	15.8438	2.88335e-20	2.06543e-18	up	yes
Zm00001d004443	Zm00001d004443	Zm00001d004443_T001	GO:0008270(zinc ion binding);GO:0009809(lignin biosynthetic process);GO:0016491(oxidoreductase activity);GO:0016616(oxidoreductase activity, acting on the CH-OH group of donors, NAD or NADP as acceptor);GO:0045551(cinnamyl-alcohol dehydrogenase activity);GO:0046872(metal ion binding);GO:0055114(oxidation-reduction process)	00940(Phenylpropanoid biosynthesis)	K00083	EC:1.1.1.195	Probable cinnamyl alcohol dehydrogenase 9	protein_coding	0.0001	0.0001	0.0001	6.7638	3.37432	1.66523	2.54165e-05	-15.2639	3.02756e-20	2.16145e-18	down	yes
Zm00001d051924	Zm00001d051924	Zm00001d051924_T002;Zm00001d051924_T001	GO:0009507(chloroplast);GO:0016787(hydrolase activity);GO:0016787(hydrolase activity)	NA	NA	NA	Haloacid dehalogenase-like hydrolase domain-containing protein	protein_coding	0.959895	1.8725	1.23761	11.9367	15.3147	14.0831	0.0984652	-3.34424	3.49416e-20	2.47945e-18	down	yes
Zm00001d034151	Zm00001d034151	Zm00001d034151_T003;Zm00001d034151_T002;Zm00001d034151_T001	NA	NA	NA	NA	BTB/POZ domain-containing protein	protein_coding	4.31233	0.727796	2.85851	0.0001	0.0001	0.0001	26328.8	14.6844	3.49629e-20	2.47945e-18	up	yes
Zm00001d031428	Zm00001d031428	Zm00001d031428_T002;Zm00001d031428_T001	GO:0009247(glycolipid biosynthetic process);GO:0016758(transferase activity, transferring hexosyl groups);GO:0016758(transferase activity, transferring hexosyl groups)	00561(Glycerolipid metabolism);00561(Glycerolipid metabolism)	K03715	EC:2.4.1.46	Monogalactosyldiacylglycerol synthase 2 chloroplastic	protein_coding	1.02778	9.72585	32.2321	0.0001	0.0001	0.0001	143286	17.1285	3.64038e-20	2.57306e-18	up	yes
Zm00001d012725	TCP-transcription factor 29	Zm00001d012725_T002;Zm00001d012725_T001	GO:0003700(DNA-binding transcription factor activity);GO:0005634(nucleus);GO:0006351(transcription, DNA-templated);GO:0006355(regulation of transcription, DNA-templated);GO:0043565(sequence-specific DNA binding);GO:0048831(regulation of shoot system development);GO:2000032(regulation of secondary shoot formation);GO:2000032(regulation of secondary shoot formation)	NA	NA	NA	Transcription factor TCP4	protein_coding	0.932086	1.12214	1.31773	9.47989	16.1614	12.5655	0.0882552	-3.50217	4.29175e-20	3.02341e-18	down	yes
Zm00001d021572	Zm00001d021572	Zm00001d021572_T001	GO:0008194(UDP-glycosyltransferase activity);GO:0016740(transferase activity);GO:0016757(transferase activity, transferring glycosyl groups);GO:0016758(transferase activity, transferring hexosyl groups);GO:0043231(intracellular membrane-bounded organelle)	NA	NA	NA	UDP-glycosyltransferase 71B1	protein_coding	0.0001	0.0001	0.018193	2.19513	1.82464	1.37646	0.00340849	-8.19665	5.36095e-20	3.76417e-18	down	yes
Zm00001d041103	Zm00001d041103	Zm00001d041103_T001	GO:0005506(iron ion binding);GO:0005634(nucleus);GO:0005737(cytoplasm);GO:0006555(methionine metabolic process);GO:0008652(cellular amino acid biosynthetic process);GO:0009086(methionine biosynthetic process);GO:0010309(acireductone dioxygenase [iron(II)-requiring] activity);GO:0016491(oxidoreductase activity);GO:0019509(L-methionine salvage from methylthioadenosine);GO:0046872(metal ion binding)…	NA	NA	NA	12-dihydroxy-3-keto-5-methylthiopentene dioxygenase 4	protein_coding	3.93624	4.5625	7.70156	0.0001	0.0001	0.0001	54001	15.7207	5.61615e-20	3.93038e-18	up	yes
Zm00001d034150	Zm00001d034150	Zm00001d034150_T001	GO:0004784(superoxide dismutase activity);GO:0006801(superoxide metabolic process);GO:0016874(ligase activity);GO:0019430(removal of superoxide radicals);GO:0046872(metal ion binding);GO:0055114(oxidation-reduction process)	NA	NA	NA	E3 ubiquitin-protein ligase RGLG1	protein_coding	14.7262	1.71082	8.90955	0.0001	0.0001	0.0001	84488.5	16.3665	5.98259e-20	4.1731e-18	up	yes
Zm00001d036616	Zm00001d036616	Zm00001d036616_T001	NA	NA	NA	NA		protein_coding	0.141712	0.390724	0.295568	13.4901	20.8436	18.5131	0.015668	-5.99603	6.09503e-20	4.23764e-18	down	yes
Zm00001d047107	Zm00001d047107	Zm00001d047107_T003;Zm00001d047107_T005;Zm00001d047107_T004;Zm00001d047107_T001;Zm00001d047107_T002	NA	NA	NA	NA		protein_coding	1.53361	3.08976	2.77639	0.0281423	0.0001	0.0001	261.086	8.02838	7.55034e-20	5.23236e-18	up	yes
Zm00001d043528	Zm00001d043528	Zm00001d043528_T001	NA	NA	NA	NA	Pathogen-related protein	protein_coding	18.196	48.46	52.0531	2.79442	3.32805	2.21884	14.2315	3.83101	8.04892e-20	5.55977e-18	up	yes
Zm00001d010085	Zm00001d010085	Zm00001d010085_T001	NA	NA	NA	NA	loricrin-related	protein_coding	2.49867	5.05622	4.50898	0.0001	0.0001	0.0001	40212.9	15.2954	8.13494e-20	5.601e-18	up	yes
Zm00001d007018	Zm00001d007018	Zm00001d007018_T001	NA	NA	NA	NA		protein_coding	11.5656	21.5379	17.507	0.585456	0.57907	0.620319	28.3557	4.82557	8.32394e-20	5.71264e-18	up	yes
Zm00001d020071	Zm00001d020071	Zm00001d020071_T001	GO:0005351(carbohydrate:proton symporter activity);GO:0005355(glucose transmembrane transporter activity);GO:0005887(integral component of plasma membrane);GO:0008643(carbohydrate transport);GO:0008645(hexose transmembrane transport);GO:0016020(membrane);GO:0016021(integral component of membrane);GO:0022857(transmembrane transporter activity);GO:0046323(glucose import);GO:0055085(transmembrane tr…	NA	NA	NA	Sugar transport protein 14	protein_coding	0.0001	0.0001	0.0001	3.00472	1.5391	3.01398	3.96941e-05	-14.6207	1.16736e-19	7.98574e-18	down	yes
Zm00001d002457	Zm00001d002457	Zm00001d002457_T001;Zm00001d002457_T002	NA	NA	NA	NA	DUF674 family protein	protein_coding	0.0001	0.0001	0.0001	2.15391	1.95316	1.78186	5.0943e-05	-14.2608	1.30347e-19	8.88825e-18	down	yes
Zm00001d031547	Zm00001d031547	Zm00001d031547_T001	GO:0005351(carbohydrate:proton symporter activity);GO:0005353(fructose transmembrane transporter activity);GO:0005355(glucose transmembrane transporter activity);GO:0005887(integral component of plasma membrane);GO:0015755(fructose transmembrane transport);GO:0016020(membrane);GO:0016021(integral component of membrane);GO:0022857(transmembrane transporter activity);GO:0046323(glucose import);GO:0…	NA	NA	NA		protein_coding	3.61121	3.79208	2.96271	0.0001	0.0001	0.0001	34553.3	15.0765	1.53795e-19	1.04537e-17	up	yes
Zm00001d011879	Zm00001d011879	Zm00001d011879_T001	NA	NA	NA	NA		protein_coding	3.67841	8.54191	3.60585	0.0001	0.0001	0.0001	52753.9	15.687	1.69015e-19	1.14516e-17	up	yes
Zm00001d039073	Zm00001d039073	Zm00001d039073_T001	NA	NA	NA	NA		protein_coding	0.0001	0.0001	0.0001	1.9444	2.26126	2.5366	4.44954e-05	-14.456	1.72339e-19	1.16397e-17	down	yes
Zm00001d050314	Zm00001d050314	Zm00001d050314_T001;Zm00001d050314_T002	GO:0006401(RNA catabolic process);GO:0055087(Ski complex);GO:0055087(Ski complex)	NA	NA	NA		protein_coding	0.0001	0.0001	0.0001	3.41861	3.20302	4.28491	2.75064e-05	-15.1499	1.72934e-19	1.1643e-17	down	yes
Zm00001d005608	Zm00001d005608	Zm00001d005608_T001;Zm00001d005608_T002	GO:0003824(catalytic activity);GO:0005829(cytosol);GO:0005840(ribosome);GO:0006520(cellular amino acid metabolic process);GO:0006545(glycine biosynthetic process);GO:0006567(threonine catabolic process);GO:0008732(L-allo-threonine aldolase activity);GO:0016829(lyase activity);GO:0016829(lyase activity)	NA	NA	NA	40S ribosomal protein S4-3	protein_coding	2.69446	1.42076	1.41188	0.0001	0.0001	0.0001	18423.7	14.1693	1.78329e-19	1.19683e-17	up	yes
Zm00001d006162	Zm00001d006162	Zm00001d006162_T001	GO:0016020(membrane);GO:0016021(integral component of membrane);GO:0043231(intracellular membrane-bounded organelle)	NA	NA	NA	ATG8-interacting protein 1	protein_coding	0.0001	0.0001	0.0001	1.52727	1.30286	1.69327	6.63217e-05	-13.8802	1.92368e-19	1.28699e-17	down	yes
Zm00001d007716	Zm00001d007716	Zm00001d007716_T001;Zm00001d007716_T002	GO:0004553(hydrolase activity, hydrolyzing O-glycosyl compounds);GO:0005975(carbohydrate metabolic process);GO:0008152(metabolic process);GO:0008422(beta-glucosidase activity);GO:0016020(membrane);GO:0016021(integral component of membrane);GO:0016740(transferase activity);GO:0016757(transferase activity, transferring glycosyl groups);GO:0016798(hydrolase activity, acting on glycosyl bonds);GO:001…	NA	NA	NA	Galactolipid galactosyltransferase SFR2 chloroplastic	protein_coding	1.59572	1.49362	1.82778	13.8578	21.9911	23.2588	0.0831893	-3.58746	2.25848e-19	1.50625e-17	down	yes
Zm00001d002455	Zm00001d002455	Zm00001d002455_T004;Zm00001d002455_T002;Zm00001d002455_T003;Zm00001d002455_T001	GO:0000502(proteasome complex);GO:0005198(structural molecule activity);GO:0005634(nucleus);GO:0005829(cytosol);GO:0006511(ubiquitin-dependent protein catabolic process);GO:0008541(proteasome regulatory particle, lid subcomplex);GO:0043248(proteasome assembly);GO:0043248(proteasome assembly)	03050(Proteasome);03050(Proteasome)	K03039	NA	26S proteasome non-ATPase regulatory subunit 13 homolog A	protein_coding	0.0001	0.0001	0.0001	2.19944	1.2021	2.38219	5.18696e-05	-14.2348	2.43181e-19	1.61677e-17	down	yes
Zm00001d027593	Zm00001d027593	Zm00001d027593_T001	GO:0000502(proteasome complex);GO:0015333(peptide:proton symporter activity);GO:0016020(membrane);GO:0016021(integral component of membrane);GO:0022857(transmembrane transporter activity);GO:0035672(oligopeptide transmembrane transport);GO:0035673(oligopeptide transmembrane transporter activity);GO:0042886(amide transport);GO:0055085(transmembrane transport);GO:1902600(proton transmembrane transp…	NA	NA	NA	proteasome component3	protein_coding	18.3789	32.9444	34.709	3.27006	2.39201	1.59436	11.856	3.56755	2.56005e-19	1.69673e-17	up	yes
Zm00001d012713	Zm00001d012713	Zm00001d012713_T002;Zm00001d012713_T001;Zm00001d012713_T003	NA	NA	NA	NA		protein_coding	0.0001	0.0001	0.0001	1.45784	2.04997	1.40217	6.11e-05	-13.9985	2.72098e-19	1.79623e-17	down	yes
Zm00001d031093	Zm00001d031093	Zm00001d031093_T001;Zm00001d031093_T003;Zm00001d031093_T002	GO:0002100(tRNA wobble adenosine to inosine editing);GO:0003824(catalytic activity);GO:0008251(tRNA-specific adenosine deaminase activity);GO:0008251(tRNA-specific adenosine deaminase activity)	NA	NA	NA		protein_coding	0.0001	0.0001	0.0197276	1.96634	2.09113	2.49911	0.00303932	-8.36203	2.72707e-19	1.79623e-17	down	yes
Zm00001d015050	Zm00001d015050	Zm00001d015050_T002;Zm00001d015050_T004;Zm00001d015050_T003;Zm00001d015050_T001	NA	NA	NA	NA	Chaperone protein dnaJ 6	protein_coding	0.0001	0.0001	0.0001	4.41364	3.837	2.25443	2.85576e-05	-15.0958	2.93595e-19	1.92785e-17	down	yes
Zm00001d048032	Zm00001d048032	Zm00001d048032_T001	NA	NA	NA	NA	OSJNBa0055H05.7 protein	protein_coding	0.0001	0.0001	0.0001	3.19124	3.2469	3.12332	3.1376e-05	-14.96	2.9555e-19	1.93472e-17	down	yes
Zm00001d024710	Zm00001d024710	Zm00001d024710_T040;Zm00001d024710_T028;Zm00001d024710_T024;Zm00001d024710_T020;Zm00001d024710_T006;Zm00001d024710_T030;Zm00001d024710_T007;Zm00001d024710_T004;Zm00001d024710_T029;Zm00001d024710_T034;Zm00001d024710_T011;Zm00001d024710_T014;Zm00001d024710_T016;Zm00001d024710_T032;Zm00001d024710_T023;Zm00001d024710_T041;Zm00001d024710_T021;Zm00001d024710_T009;Zm00001d024710_T036;Zm00001d024710_T039…	GO:0004672(protein kinase activity);GO:0005524(ATP binding);GO:0006468(protein phosphorylation);GO:0016020(membrane);GO:0016021(integral component of membrane);GO:0016021(integral component of membrane)	NA	NA	NA		protein_coding	0.822393	1.23965	1.05342	0.0001	0.0139621	0.0001	219.986	7.78127	3.20027e-19	2.08852e-17	up	yes
Zm00001d008196	Zm00001d008196	Zm00001d008196_T001	NA	NA	NA	NA		protein_coding	0.0001	0.0001	0.068614	5.94394	5.5438	7.66997	0.00359197	-8.12101	3.31158e-19	2.15455e-17	down	yes
Zm00001d051060	Zm00001d051060	Zm00001d051060_T004;Zm00001d051060_T002;Zm00001d051060_T001;Zm00001d051060_T003	NA	NA	NA	NA	Polyprotein	protein_coding	2.29651	3.50219	1.77528	0.0001	0.0001	0.0001	25246.6	14.6238	3.5704e-19	2.31586e-17	up	yes
Zm00001d054064	Zm00001d054064	Zm00001d054064_T001;Zm00001d054064_T003;Zm00001d054064_T002	GO:0008168(methyltransferase activity);GO:0016020(membrane);GO:0016021(integral component of membrane);GO:0016740(transferase activity);GO:0032259(methylation);GO:0032259(methylation)	NA	NA	NA	S-adenosyl-L-methionine-dependent methyltransferases superfamily protein	protein_coding	1.59244	1.46227	2.16976	0.0001	0.0001	0.0001	17414.9	14.088	3.81069e-19	2.4642e-17	up	yes
ZemaCp032	rbcL	ZemaCp032	GO:0000287(magnesium ion binding);GO:0004497(monooxygenase activity);GO:0009507(chloroplast);GO:0009536(plastid);GO:0009853(photorespiration);GO:0015977(carbon fixation);GO:0015979(photosynthesis);GO:0016491(oxidoreductase activity);GO:0016829(lyase activity);GO:0016984(ribulose-bisphosphate carboxylase activity);GO:0019253(reductive pentose-phosphate cycle);GO:0046872(metal ion binding);GO:00551…	00630(Glyoxylate and dicarboxylate metabolism);00710(Carbon fixation in photosynthetic organisms)	K01601	EC:4.1.1.39	rbcL	protein_coding	4607.33	897.717	1468.66	3.88059	15.5224	3.0319	310.841	8.28003	4.57748e-19	2.95109e-17	up	yes
Zm00001d032811	Zm00001d032811	Zm00001d032811_T004;Zm00001d032811_T003;Zm00001d032811_T001;Zm00001d032811_T002	GO:0003924(GTPase activity);GO:0005525(GTP binding);GO:0005794(Golgi apparatus);GO:0006886(intracellular protein transport);GO:0012505(endomembrane system);GO:0032482(Rab protein signal transduction);GO:0032482(Rab protein signal transduction)	NA	K07910	NA	Ras-related protein Rab-18	protein_coding	0.160167	0.403154	0.270507	3.65315	2.72577	3.26714	0.0864423	-3.53212	4.64262e-19	2.98404e-17	down	yes
Zm00001d019087	Zm00001d019087	Zm00001d019087_T016;Zm00001d019087_T002;Zm00001d019087_T015;Zm00001d019087_T008;Zm00001d019087_T009;Zm00001d019087_T011;Zm00001d019087_T003;Zm00001d019087_T018;Zm00001d019087_T012;Zm00001d019087_T017;Zm00001d019087_T001;Zm00001d019087_T005;Zm00001d019087_T013;Zm00001d019087_T007;Zm00001d019087_T010;Zm00001d019087_T004;Zm00001d019087_T006;Zm00001d019087_T014	GO:0005681(spliceosomal complex);GO:0006396(RNA processing);GO:0016020(membrane);GO:0016021(integral component of membrane);GO:0045292(mRNA cis splicing, via spliceosome);GO:0045292(mRNA cis splicing, via spliceosome)	NA	NA	NA	proline-rich family protein	protein_coding	0.0112908	0.0001	0.0001	1.15038	0.692846	1.66892	0.00327172	-8.25574	4.70298e-19	3.01373e-17	down	yes
Zm00001d034735	Zm00001d034735	Zm00001d034735_T003;Zm00001d034735_T008;Zm00001d034735_T006;Zm00001d034735_T001;Zm00001d034735_T007;Zm00001d034735_T002;Zm00001d034735_T005;Zm00001d034735_T004	GO:0003676(nucleic acid binding);GO:0003676(nucleic acid binding)	NA	NA	NA	Zinc finger CCCH domain-containing protein 46	protein_coding	0.0001	0.0001	0.0001	0.743212	0.652253	1.12988	0.000118796	-13.0392	5.33644e-19	3.40939e-17	down	yes
Zm00001d033584	Zm00001d033584	Zm00001d033584_T002;Zm00001d033584_T001	NA	NA	NA	NA		protein_coding	0.0001	0.137303	0.138987	6.23285	7.14501	5.43141	0.0146944	-6.08859	5.3606e-19	3.41457e-17	down	yes
Zm00001d037173	Zm00001d037173	Zm00001d037173_T001	GO:0005509(calcium ion binding)	NA	NA	NA	EF hand family protein	protein_coding	2.29201	1.06804	2.98517	73.8669	38.9834	73.4621	0.0340569	-4.87591	5.45905e-19	3.46691e-17	down	yes
Zm00001d045973	Zm00001d045973	Zm00001d045973_T003;Zm00001d045973_T001;Zm00001d045973_T004;Zm00001d045973_T002	GO:0016020(membrane);GO:0016021(integral component of membrane);GO:0016021(integral component of membrane)	NA	NA	NA	Small RNA degrading nuclease 3	protein_coding	3.21582	2.97228	2.20851	0.0001	0.0001	0.0001	27988.7	14.7726	6.21831e-19	3.93733e-17	up	yes
Zm00001d023846	Zm00001d023846	Zm00001d023846_T008;Zm00001d023846_T006;Zm00001d023846_T004;Zm00001d023846_T001;Zm00001d023846_T005;Zm00001d023846_T002;Zm00001d023846_T003;Zm00001d023846_T007	GO:0006511(ubiquitin-dependent protein catabolic process);GO:0016567(protein ubiquitination);GO:0016874(ligase activity);GO:0061630(ubiquitin protein ligase activity);GO:0061630(ubiquitin protein ligase activity)	NA	NA	NA	ERAD-associated E3 ubiquitin-protein ligase HRD1A	protein_coding	10.1158	12.373	11.6005	0.736182	0.793715	0.694834	15.3229	3.93761	7.09382e-19	4.47837e-17	up	yes
Zm00001d048029	Zm00001d048029	Zm00001d048029_T001;Zm00001d048029_T002	NA	NA	NA	NA		protein_coding	0.0001	0.0001	0.0001	2.29601	2.07776	3.6714	3.72895e-05	-14.7109	7.37648e-19	4.64303e-17	down	yes
Zm00001d014348	Zm00001d014348	Zm00001d014348_T001	NA	NA	NA	NA		protein_coding	0.0001	0.0001	0.0001	2.4477	1.92237	3.13378	3.99795e-05	-14.6104	7.41871e-19	4.65584e-17	down	yes
Zm00001d048123	MFP1 attachment factor1	Zm00001d048123_T001	NA	NA	NA	NA	MFP1 attachment factor 1	protein_coding	18.6324	36.6497	27.6425	0.609521	1.13	1.39007	26.4969	4.72775	7.49458e-19	4.68963e-17	up	yes
Zm00001d043881	Zm00001d043881	Zm00001d043881_T001	GO:0009707(chloroplast outer membrane);GO:0019375(galactolipid biosynthetic process);GO:0035250(UDP-galactosyltransferase activity)	NA	NA	NA	Digalactosyldiacylglycerol synthase 1 chloroplastic	protein_coding	5.5366	6.47743	7.56907	0.0001	0.0001	0.0001	65277	15.9943	7.59084e-19	4.73593e-17	up	yes
Zm00001d029794	Zm00001d029794	Zm00001d029794_T001	GO:0004568(chitinase activity);GO:0005975(carbohydrate metabolic process);GO:0006032(chitin catabolic process);GO:0016998(cell wall macromolecule catabolic process);GO:0050832(defense response to fungus)	NA	NA	NA	Basic endochitinase B	protein_coding	4.23872	34.4595	24.418	0.177654	0.067474	0.315139	112.654	6.81575	8.16415e-19	5.07872e-17	up	yes
Zm00001d025000	Zm00001d025000	Zm00001d025000_T001	GO:0002100(tRNA wobble adenosine to inosine editing);GO:0003824(catalytic activity);GO:0052717(tRNA-specific adenosine-34 deaminase activity);GO:0052718(tRNA-specific adenosine-34 deaminase complex)	NA	NA	NA	Cytidine/deoxycytidylate deaminase family protein	protein_coding	0.0001	0.055279	0.0001	4.44481	5.17294	5.89027	0.00357744	-8.12686	8.32148e-19	5.1615e-17	down	yes
Zm00001d049904	Zm00001d049904	Zm00001d049904_T001	GO:0002181(cytoplasmic translation);GO:0003723(RNA binding);GO:0003735(structural constituent of ribosome);GO:0005840(ribosome);GO:0006412(translation);GO:0015934(large ribosomal subunit);GO:0022625(cytosolic large ribosomal subunit);GO:0042273(ribosomal large subunit biogenesis)	NA	NA	NA	60S ribosomal protein L26-1	protein_coding	0.0001	0.025252	0.0001	11.2879	19.7604	4.18018	0.000722483	-10.4347	8.64056e-19	5.34384e-17	down	yes
Zm00001d045759	Zm00001d045759	Zm00001d045759_T002;Zm00001d045759_T001	GO:0000166(nucleotide binding);GO:0003777(microtubule motor activity);GO:0005524(ATP binding);GO:0005871(kinesin complex);GO:0005874(microtubule);GO:0007018(microtubule-based movement);GO:0008017(microtubule binding);GO:0016887(ATPase activity);GO:0016887(ATPase activity)	NA	NA	NA		protein_coding	1.18509	2.5927	3.22683	0.0001	0.0001	0.0001	23348.7	14.5111	8.89681e-19	5.48429e-17	up	yes
Zm00001d023320	Zm00001d023320	Zm00001d023320_T005;Zm00001d023320_T001;Zm00001d023320_T004;Zm00001d023320_T003;Zm00001d023320_T006	GO:0043531(ADP binding);GO:0043531(ADP binding)	NA	NA	NA		protein_coding	1.99541	3.84765	4.15861	0.369448	0.186709	0.206043	13.1221	3.71393	8.91921e-19	5.48429e-17	up	yes
Zm00001d018430	Zm00001d018430	Zm00001d018430_T005;Zm00001d018430_T002;Zm00001d018430_T014;Zm00001d018430_T001;Zm00001d018430_T006;Zm00001d018430_T004;Zm00001d018430_T008;Zm00001d018430_T010;Zm00001d018430_T003;Zm00001d018430_T009;Zm00001d018430_T007	NA	NA	NA	NA		protein_coding	0.0001	0.0001	0.0001	0.566282	1.46502	0.942853	0.000100869	-13.2752	9.52213e-19	5.83814e-17	down	yes
Zm00001d045677	Zm00001d045677	Zm00001d045677_T001	GO:0016020(membrane);GO:0016021(integral component of membrane)	NA	NA	NA		protein_coding	0.0001	0.0001	0.0001	2.16806	2.33045	1.51923	4.98525e-05	-14.292	9.71099e-19	5.93645e-17	down	yes
Zm00001d010373	Zm00001d010373	Zm00001d010373_T001	GO:0003993(acid phosphatase activity);GO:0016311(dephosphorylation)	NA	NA	NA	Stem glycoprotein	protein_coding	0.270597	0.250291	0.522761	11.4576	39.1444	9.38886	0.0173968	-5.84504	9.73828e-19	5.93645e-17	down	yes
Zm00001d039959	Zm00001d039959	Zm00001d039959_T001	GO:0000145(exocyst);GO:0001927(exocyst assembly);GO:0006887(exocytosis);GO:0006893(Golgi to plasma membrane transport);GO:0016020(membrane);GO:0016021(integral component of membrane);GO:0016192(vesicle-mediated transport)	NA	NA	NA	Exocyst complex component SEC5A	protein_coding	0.0001	0.0001	0.0001	3.25957	7.00763	7.42158	1.69599e-05	-15.8475	9.92236e-19	6.03138e-17	down	yes
Zm00001d004439	Zm00001d004439	Zm00001d004439_T001	GO:0003676(nucleic acid binding)	NA	NA	NA	C2H2-type zinc finger family protein	protein_coding	0.0001	0.0001	0.0001	4.23379	3.50243	2.53251	2.92149e-05	-15.0629	1.06229e-18	6.43884e-17	down	yes
Zm00001d021981	Zm00001d021981	Zm00001d021981_T001	GO:0004046(aminoacylase activity);GO:0016787(hydrolase activity)	NA	NA	NA	Peptidase M20/M25/M40 family protein	protein_coding	2.87264	6.95568	5.20734	0.0001	0.0001	0.0001	50118.9	15.6131	1.20172e-18	7.26323e-17	up	yes
Zm00001d006458	Zm00001d006458	Zm00001d006458_T001	NA	NA	NA	NA		protein_coding	10.6557	18.7446	15.3124	0.0001	0.0001	0.0001	149043	17.1854	1.26986e-18	7.651e-17	up	yes
Zm00001d019354	Zm00001d019354	Zm00001d019354_T001;Zm00001d019354_T002;Zm00001d019354_T005;Zm00001d019354_T003;Zm00001d019354_T006;Zm00001d019354_T004	GO:0003700(DNA-binding transcription factor activity);GO:0006355(regulation of transcription, DNA-templated);GO:0043531(ADP binding);GO:0043565(sequence-specific DNA binding);GO:0043565(sequence-specific DNA binding)	NA	NA	NA		protein_coding	0.428639	0.830149	0.681848	0.0001	0.0001	0.0001	6468.79	12.6593	1.27307e-18	7.651e-17	up	yes
Zm00001d020554	Zm00001d020554	Zm00001d020554_T001	NA	NA	NA	NA		protein_coding	2.69164	3.26657	4.13633	0.0001	0.0001	0.0001	33648.5	15.0383	1.35703e-18	8.1326e-17	up	yes
Zm00001d008053	Zm00001d008053	Zm00001d008053_T001	NA	NA	NA	NA		lincRNA	0.0001	0.0001	0.0001	2.27771	2.28614	3.25939	3.83473e-05	-14.6705	1.36392e-18	8.15095e-17	down	yes
Zm00001d002181	Zm00001d002181	Zm00001d002181_T001	GO:0004672(protein kinase activity);GO:0004674(protein serine/threonine kinase activity);GO:0005524(ATP binding);GO:0005886(plasma membrane);GO:0006468(protein phosphorylation);GO:0016020(membrane);GO:0016021(integral component of membrane);GO:0016301(kinase activity);GO:0016310(phosphorylation);GO:0030246(carbohydrate binding);GO:0048544(recognition of pollen)	NA	NA	NA	G-type lectin S-receptor-like serine/threonine-protein kinase B120	protein_coding	0.0001	0.026925	0.0001	1.94121	1.548	2.01687	0.00492637	-7.66526	1.41184e-18	8.41372e-17	down	yes
Zm00001d023303	Zm00001d023303	Zm00001d023303_T006;Zm00001d023303_T015;Zm00001d023303_T021;Zm00001d023303_T002;Zm00001d023303_T018;Zm00001d023303_T016;Zm00001d023303_T035;Zm00001d023303_T003;Zm00001d023303_T005;Zm00001d023303_T011;Zm00001d023303_T023;Zm00001d023303_T034;Zm00001d023303_T007;Zm00001d023303_T009;Zm00001d023303_T004;Zm00001d023303_T024;Zm00001d023303_T029;Zm00001d023303_T033;Zm00001d023303_T022;Zm00001d023303_T010…	GO:0000166(nucleotide binding);GO:0006355(regulation of transcription, DNA-templated);GO:0006952(defense response);GO:0043531(ADP binding);GO:0043531(ADP binding)	NA	NA	NA		protein_coding	1.04707	1.58034	1.32548	0.0001	0.0001	0.0218602	179.187	7.48532	1.42677e-18	8.47891e-17	up	yes
Zm00001d031556	Zm00001d031556	Zm00001d031556_T001	GO:0016020(membrane);GO:0016021(integral component of membrane)	NA	NA	NA	AIR12	protein_coding	43.8041	84.0061	47.5375	0.270779	2.11295	1.65494	43.4173	5.4402	1.45772e-18	8.63872e-17	up	yes
Zm00001d011848	Zm00001d011848	Zm00001d011848_T001	GO:0002181(cytoplasmic translation);GO:0003735(structural constituent of ribosome);GO:0005840(ribosome);GO:0006412(translation);GO:0015934(large ribosomal subunit);GO:0022625(cytosolic large ribosomal subunit)	NA	NA	NA	60S ribosomal protein L17-2	protein_coding	0.0001	0.0001	0.0001	5.4942	3.28516	7.54454	1.8378e-05	-15.7317	1.57461e-18	9.30549e-17	down	yes
Zm00001d014878	Zm00001d014878	Zm00001d014878_T001	GO:0016020(membrane);GO:0016021(integral component of membrane)	NA	NA	NA		protein_coding	0.099216	0.0001	0.038312	7.61604	7.85042	9.08797	0.00560502	-7.47907	1.68328e-18	9.92017e-17	down	yes
Zm00001d012988	Zm00001d012988	Zm00001d012988_T002;Zm00001d012988_T001	GO:0005886(plasma membrane);GO:0016020(membrane);GO:0016021(integral component of membrane);GO:0016021(integral component of membrane)	NA	NA	NA	CASP-like protein 4B1	protein_coding	25.8187	20.3332	20.0918	2.1325	1.2842	1.62158	13.1481	3.71678	1.72889e-18	1.01608e-16	up	yes
Zm00001d007800	Zm00001d007800	Zm00001d007800_T001	GO:0005623(cell);GO:0006662(glycerol ether metabolic process);GO:0015035(protein disulfide oxidoreductase activity);GO:0045454(cell redox homeostasis);GO:0055114(oxidation-reduction process)	NA	K03671	NA	Thioredoxin	protein_coding	0.0001	0.462041	0.3063	18.1138	18.8274	13.1402	0.0153438	-6.0262	1.8677e-18	1.09464e-16	down	yes
Zm00001d028867	Zm00001d028867	Zm00001d028867_T002;Zm00001d028867_T001;Zm00001d028867_T003	NA	NA	NA	NA	cAMP-regulated phosphoprotein 19-related protein	protein_coding	58.5754	121.122	112.812	5.75236	11.0325	5.49585	13.1284	3.71462	2.06205e-18	1.20522e-16	up	yes
Zm00001d031733	Zm00001d031733	Zm00001d031733_T001	NA	NA	NA	NA		protein_coding	2.93493	4.49777	3.4277	0.0001	0.0001	0.0001	36201.3	15.1438	2.35824e-18	1.37456e-16	up	yes
Zm00001d012170	Zm00001d012170	Zm00001d012170_T002;Zm00001d012170_T001	GO:0005509(calcium ion binding);GO:0005515(protein binding);GO:0005783(endoplasmic reticulum);GO:0005788(endoplasmic reticulum lumen);GO:0005789(endoplasmic reticulum membrane);GO:0006457(protein folding);GO:0030968(endoplasmic reticulum unfolded protein response);GO:0046872(metal ion binding);GO:0051082(unfolded protein binding);GO:0051082(unfolded protein binding)	04141(Protein processing in endoplasmic reticulum);04145(Phagosome);04145(Phagosome)	K08057	NA	Calreticulin-3	protein_coding	39.5987	101.161	80.1133	7.60842	6.92812	6.16596	10.6689	3.41534	2.4823e-18	1.44292e-16	up	yes
Zm00001d047967	Zm00001d047967	Zm00001d047967_T004;Zm00001d047967_T003;Zm00001d047967_T001;Zm00001d047967_T002	GO:0003700(DNA-binding transcription factor activity);GO:0005634(nucleus);GO:0006355(regulation of transcription, DNA-templated);GO:0043565(sequence-specific DNA binding);GO:0043565(sequence-specific DNA binding)	NA	NA	NA	bZIP transcription factor 16	protein_coding	0.0001	0.0043152	0.0001	0.97814	1.86143	1.53943	0.0010311	-9.92159	2.64865e-18	1.53542e-16	down	yes
Zm00001d051485	Zm00001d051485	Zm00001d051485_T001	GO:0000287(magnesium ion binding);GO:0015977(carbon fixation);GO:0016984(ribulose-bisphosphate carboxylase activity)	NA	NA	NA	Putative uncharacterized mitochondrial protein	protein_coding	227.445	89.7568	173.259	7.20396	9.50426	8.50184	19.4549	4.28206	2.71224e-18	1.56802e-16	up	yes
Zm00001d042154	Zm00001d042154	Zm00001d042154_T003;Zm00001d042154_T027;Zm00001d042154_T018;Zm00001d042154_T023;Zm00001d042154_T015;Zm00001d042154_T006;Zm00001d042154_T014;Zm00001d042154_T011;Zm00001d042154_T021;Zm00001d042154_T009;Zm00001d042154_T019;Zm00001d042154_T004;Zm00001d042154_T002;Zm00001d042154_T017;Zm00001d042154_T022;Zm00001d042154_T008;Zm00001d042154_T012;Zm00001d042154_T025;Zm00001d042154_T007;Zm00001d042154_T020…	GO:0003735(structural constituent of ribosome);GO:0003983(UTP:glucose-1-phosphate uridylyltransferase activity);GO:0005737(cytoplasm);GO:0005840(ribosome);GO:0005977(glycogen metabolic process);GO:0006011(UDP-glucose metabolic process);GO:0006412(translation);GO:0070569(uridylyltransferase activity);GO:0070569(uridylyltransferase activity)	NA	NA	NA	40S ribosomal protein S4-3	protein_coding	0.248015	0.0888831	0.149315	4.28453	3.87712	4.4219	0.0386387	-4.69381	2.86269e-18	1.65051e-16	down	yes
Zm00001d031948	Zm00001d031948	Zm00001d031948_T002;Zm00001d031948_T008;Zm00001d031948_T001;Zm00001d031948_T004;Zm00001d031948_T007;Zm00001d031948_T003;Zm00001d031948_T006;Zm00001d031948_T005	GO:0005515(protein binding);GO:0005623(cell);GO:0009055(electron transfer activity);GO:0009507(chloroplast);GO:0016020(membrane);GO:0016021(integral component of membrane);GO:0022900(electron transport chain);GO:0045454(cell redox homeostasis);GO:0045454(cell redox homeostasis)	NA	NA	NA	Thioredoxin family protein	protein_coding	1.62272	2.73455	2.35417	17.3806	16.4147	15.8825	0.135099	-2.88791	2.97834e-18	1.71254e-16	down	yes
Zm00001d051132	Zm00001d051132	Zm00001d051132_T001;Zm00001d051132_T002;Zm00001d051132_T003	NA	NA	NA	NA	Polyprotein	protein_coding	2.36434	3.38082	1.53252	0.0001	0.0001	0.0001	24258.9	14.5662	3.06597e-18	1.75818e-16	up	yes
Zm00001d006845	Zm00001d006845	Zm00001d006845_T010;Zm00001d006845_T018;Zm00001d006845_T014;Zm00001d006845_T003;Zm00001d006845_T001;Zm00001d006845_T021;Zm00001d006845_T023;Zm00001d006845_T009;Zm00001d006845_T005;Zm00001d006845_T006;Zm00001d006845_T013;Zm00001d006845_T004;Zm00001d006845_T002;Zm00001d006845_T007;Zm00001d006845_T008;Zm00001d006845_T011;Zm00001d006845_T020	GO:0000049(tRNA binding);GO:0003723(RNA binding);GO:0005634(nucleus);GO:0005643(nuclear pore);GO:0005737(cytoplasm);GO:0006409(tRNA export from nucleus);GO:0008536(Ran GTPase binding);GO:0016363(nuclear matrix);GO:0071528(tRNA re-export from nucleus);GO:0071528(tRNA re-export from nucleus)	03013(RNA transport);03013(RNA transport)	K14288	NA	Exportin-T	protein_coding	0.0331999	0.0001	0.0001	2.02222	2.53936	2.05995	0.00504413	-7.63118	3.34963e-18	1.91568e-16	down	yes
Zm00001d017046	Zm00001d017046	Zm00001d017046_T001;Zm00001d017046_T002	GO:0005515(protein binding);GO:0005515(protein binding)	NA	NA	NA	Transducin/WD40 repeat-like superfamily protein	protein_coding	0.0001	0.0001	0.0001	0.923604	1.86918	2.05455	6.18896e-05	-13.9799	3.58273e-18	2.0435e-16	down	yes
Zm00001d010113	Zm00001d010113	Zm00001d010113_T001	NA	NA	NA	NA		protein_coding	0.0001	0.0001	0.0001	5.74223	4.13014	6.02809	1.88674e-05	-15.6937	3.72886e-18	2.12117e-16	down	yes
Zm00001d015031	Zm00001d015031	Zm00001d015031_T001	GO:0009536(plastid)	NA	NA	NA	DUF3820 family protein	protein_coding	8.31112	10.8558	10.2063	77.1721	71.7108	76.0701	0.130575	-2.93705	3.93878e-18	2.2346e-16	down	yes
Zm00001d031957	Zm00001d031957	Zm00001d031957_T001	GO:0000470(maturation of LSU-rRNA);GO:0003723(RNA binding);GO:0003735(structural constituent of ribosome);GO:0005840(ribosome);GO:0006412(translation);GO:0015934(large ribosomal subunit);GO:0022625(cytosolic large ribosomal subunit)	03010(Ribosome)	K02865	NA	60S ribosomal protein L10a-1	protein_coding	1.30852	4.42556	3.59595	33.9399	42.1511	27.5872	0.0899903	-3.47409	4.09134e-18	2.31498e-16	down	yes
Zm00001d013606	Zm00001d013606	Zm00001d013606_T012;Zm00001d013606_T022;Zm00001d013606_T006;Zm00001d013606_T004;Zm00001d013606_T007;Zm00001d013606_T024;Zm00001d013606_T021;Zm00001d013606_T017;Zm00001d013606_T014;Zm00001d013606_T016;Zm00001d013606_T015;Zm00001d013606_T001;Zm00001d013606_T003;Zm00001d013606_T010;Zm00001d013606_T013;Zm00001d013606_T020;Zm00001d013606_T002;Zm00001d013606_T008;Zm00001d013606_T005;Zm00001d013606_T023…	GO:0000166(nucleotide binding);GO:0004672(protein kinase activity);GO:0004674(protein serine/threonine kinase activity);GO:0005524(ATP binding);GO:0006468(protein phosphorylation);GO:0016020(membrane);GO:0016021(integral component of membrane);GO:0016301(kinase activity);GO:0016310(phosphorylation);GO:0016310(phosphorylation)	NA	NA	NA		protein_coding	0.0172209	0.0351305	0.0232046	1.37919	1.0498	0.990844	0.0220935	-5.50023	4.23588e-18	2.39041e-16	down	yes
Zm00001d016651	Zm00001d016651	Zm00001d016651_T001	NA	NA	NA	NA		protein_coding	3.01003	5.63777	6.69271	0.0001	0.0001	0.0001	51135.1	15.642	4.26569e-18	2.40086e-16	up	yes
Zm00001d025622	Zm00001d025622	Zm00001d025622_T001	GO:0016020(membrane);GO:0016021(integral component of membrane)	NA	NA	NA	DUF593-containing protein 2	protein_coding	3.27666	4.96441	5.14266	0.0001	0.0001	0.0001	44612.4	15.4452	4.40925e-18	2.47511e-16	up	yes
Zm00001d025599	Zm00001d025599	Zm00001d025599_T001	GO:0004365(glyceraldehyde-3-phosphate dehydrogenase (NAD+) (phosphorylating) activity);GO:0006006(glucose metabolic process);GO:0009507(chloroplast);GO:0016620(oxidoreductase activity, acting on the aldehyde or oxo group of donors, NAD or NADP as acceptor);GO:0048046(apoplast);GO:0050661(NADP binding);GO:0051287(NAD binding);GO:0055114(oxidation-reduction process)	NA	NA	NA	Glyceraldehyde-3-phosphate dehydrogenase GAPA1 chloroplastic	protein_coding	0.0001	0.0001	0.0001	1.92437	2.39156	2.74692	4.24757e-05	-14.523	5.01537e-18	2.80795e-16	down	yes
Zm00001d028313	ZIM-transcription factor 22	Zm00001d028313_T001	GO:0005634(nucleus);GO:0009611(response to wounding);GO:0031347(regulation of defense response);GO:2000022(regulation of jasmonic acid mediated signaling pathway)	NA	NA	NA	PnFL-2%3B Putative tify domain/CCT motif transcription factor family protein	protein_coding	0.0001	0.0001	0.0001	2.39123	7.01104	3.10976	2.39769e-05	-15.348	5.16551e-18	2.88441e-16	down	yes
Zm00001d019813	Zm00001d019813	Zm00001d019813_T001	GO:0010436(carotenoid dioxygenase activity);GO:0016121(carotene catabolic process);GO:0016702(oxidoreductase activity, acting on single donors with incorporation of molecular oxygen, incorporation of two atoms of oxygen);GO:0045549(9-cis-epoxycarotenoid dioxygenase activity);GO:0046872(metal ion binding);GO:0051213(dioxygenase activity);GO:0055114(oxidation-reduction process)	00906(Carotenoid biosynthesis)	K09840	EC:1.13.11.51	9-cis-epoxycarotenoid dioxygenase NCED3 chloroplastic	protein_coding	0.0001	0.0001	0.0001	4.06545	3.33232	4.18087	2.59098e-05	-15.2361	5.64669e-18	3.14485e-16	down	yes
Zm00001d012243	Zm00001d012243	Zm00001d012243_T001	GO:0005886(plasma membrane);GO:0046854(phosphatidylinositol phosphorylation);GO:0072659(protein localization to plasma membrane)	NA	K21844	NA		protein_coding	2.59007	6.89772	6.34842	0.04245	0.072159	0.0001	138.056	7.1091	5.78261e-18	3.21214e-16	up	yes
Zm00001d033237	Zm00001d033237	Zm00001d033237_T001	GO:0002229(defense response to oomycetes);GO:0003824(catalytic activity);GO:0004672(protein kinase activity);GO:0004675(transmembrane receptor protein serine/threonine kinase activity);GO:0004807(triose-phosphate isomerase activity);GO:0005179(hormone activity);GO:0005524(ATP binding);GO:0005576(extracellular region);GO:0005886(plasma membrane);GO:0006468(protein phosphorylation);GO:0006952(defen…	NA	NA	NA	Uncharacterised conserved protein UCP031088 alpha/beta hydrolase	protein_coding	1.00589	2.11176	1.38967	0.0001	0.0001	0.0001	15024.4	13.875	6.17407e-18	3.42066e-16	up	yes
Zm00001d052991	Zm00001d052991	Zm00001d052991_T001	GO:0000027(ribosomal large subunit assembly);GO:0003723(RNA binding);GO:0003735(structural constituent of ribosome);GO:0005840(ribosome);GO:0006412(translation);GO:0022625(cytosolic large ribosomal subunit)	NA	NA	NA		protein_coding	0.0001	0.0001	0.0001	2.80227	2.8359	3.00227	3.47204e-05	-14.8139	6.26091e-18	3.45976e-16	down	yes
Zm00001d049771	Zm00001d049771	Zm00001d049771_T002;Zm00001d049771_T001	GO:0000166(nucleotide binding);GO:0004222(metalloendopeptidase activity);GO:0004812(aminoacyl-tRNA ligase activity);GO:0005524(ATP binding);GO:0005787(signal peptidase complex);GO:0006418(tRNA aminoacylation for protein translation);GO:0006465(signal peptide processing);GO:0006508(proteolysis);GO:0008233(peptidase activity);GO:0008237(metallopeptidase activity);GO:0016020(membrane);GO:0016021(int…	NA	NA	NA	Peptidase family M48 family protein	protein_coding	1.30915	1.42882	1.3855	0.0001	0.0001	0.0001	13744.9	13.7466	7.45123e-18	4.10686e-16	up	yes
Zm00001d044396	Zm00001d044396	Zm00001d044396_T001	GO:0009416(response to light stimulus);GO:0009507(chloroplast);GO:0009522(photosystem I);GO:0009523(photosystem II);GO:0009535(chloroplast thylakoid membrane);GO:0009536(plastid);GO:0009579(thylakoid);GO:0009765(photosynthesis, light harvesting);GO:0009768(photosynthesis, light harvesting in photosystem I);GO:0009941(chloroplast envelope);GO:0010287(plastoglobule);GO:0015979(photosynthesis);GO:00…	00196(Photosynthesis - antenna proteins)	K08912	NA	Chlorophyll a-b binding protein 48%2C chloroplastic	protein_coding	42.7632	27.2884	25.0168	582.361	483.154	403.046	0.0647357	-3.94929	7.6335e-18	4.19645e-16	down	yes
Zm00001d027131	Zm00001d027131	Zm00001d027131_T001	NA	NA	NA	NA		lincRNA	0.367688	0.177528	0.0001	12.3212	25.0515	36.3421	0.00739765	-7.07872	7.7644e-18	4.25741e-16	down	yes
Zm00001d006522	Zm00001d006522	Zm00001d006522_T002;Zm00001d006522_T004;Zm00001d006522_T001;Zm00001d006522_T003	GO:0016020(membrane);GO:0016021(integral component of membrane);GO:0016021(integral component of membrane)	NA	NA	NA		protein_coding	1.50088	0.614309	1.35118	0.0001	0.0001	0.0001	11554.6	13.4962	8.32874e-18	4.55512e-16	up	yes
Zm00001d029285	pyruvate dehydrogenase (lipoamide) kinase1	Zm00001d029285_T003;Zm00001d029285_T004;Zm00001d029285_T007;Zm00001d029285_T010;Zm00001d029285_T005;Zm00001d029285_T008;Zm00001d029285_T001;Zm00001d029285_T006;Zm00001d029285_T009;Zm00001d029285_T002	GO:0000166(nucleotide binding);GO:0004672(protein kinase activity);GO:0004674(protein serine/threonine kinase activity);GO:0004740(pyruvate dehydrogenase (acetyl-transferring) kinase activity);GO:0005524(ATP binding);GO:0005739(mitochondrion);GO:0005759(mitochondrial matrix);GO:0006468(protein phosphorylation);GO:0016301(kinase activity);GO:0016310(phosphorylation);GO:0016740(transferase activity…	NA	K00898	EC:2.7.11.2	pyruvate dehydrogenase (lipoamide) kinase1	protein_coding	1.63145	1.32283	1.72394	13.0706	15.8339	16.4816	0.103076	-3.27822	8.58036e-18	4.6807e-16	down	yes
Zm00001d048680	Zm00001d048680	Zm00001d048680_T005;Zm00001d048680_T002;Zm00001d048680_T001;Zm00001d048680_T007;Zm00001d048680_T004;Zm00001d048680_T009;Zm00001d048680_T008;Zm00001d048680_T006	GO:0004672(protein kinase activity);GO:0005524(ATP binding);GO:0006468(protein phosphorylation);GO:0007166(cell surface receptor signaling pathway);GO:0007166(cell surface receptor signaling pathway)	NA	NA	NA	Protein MID1-COMPLEMENTING ACTIVITY 1	protein_coding	10.1283	37.7798	30.6749	2.03703	1.03545	0.754287	20.5351	4.36002	9.3185e-18	5.07036e-16	up	yes
Zm00001d026392	Zm00001d026392	Zm00001d026392_T001;Zm00001d026392_T003;Zm00001d026392_T002	GO:0000398(mRNA splicing, via spliceosome);GO:0000956(nuclear-transcribed mRNA catabolic process);GO:0005688(U6 snRNP);GO:0005689(U12-type spliceosomal complex);GO:0071004(U2-type prespliceosome);GO:0071013(catalytic step 2 spliceosome);GO:0097526(spliceosomal tri-snRNP complex);GO:1990726(Lsm1-7-Pat1 complex);GO:1990904(ribonucleoprotein complex);GO:1990904(ribonucleoprotein complex)	NA	NA	NA	LSM7-like%3B LSM7-like protein	protein_coding	0.323028	0.870059	0.535715	0.0001	0.0001	0.0001	5762.67	12.4925	1.06456e-17	5.76797e-16	up	yes
Zm00001d037923	Zm00001d037923	Zm00001d037923_T001	NA	NA	NA	NA	Octicosapeptide/Phox/Bem1p (PB1) domain-containing protein / tetratricopeptide repeat (TPR)-containing protein	protein_coding	0.0001	0.0001	0.0001	2.24962	3.10879	3.91572	3.23481e-05	-14.916	1.06548e-17	5.76797e-16	down	yes
Zm00001d036894	heme oxygenase2	Zm00001d036894_T001	GO:0004392(heme oxygenase (decyclizing) activity);GO:0006788(heme oxidation);GO:0016491(oxidoreductase activity);GO:0055114(oxidation-reduction process)	NA	NA	NA	heme oxygenase2	protein_coding	29.3335	34.1807	48.3908	3.31216	3.71608	4.72556	9.52075	3.25108	1.27156e-17	6.86609e-16	up	yes
Zm00001d013211	Zm00001d013211	Zm00001d013211_T002;Zm00001d013211_T007;Zm00001d013211_T011;Zm00001d013211_T008;Zm00001d013211_T003;Zm00001d013211_T010;Zm00001d013211_T004;Zm00001d013211_T006;Zm00001d013211_T001;Zm00001d013211_T009;Zm00001d013211_T005	GO:0003735(structural constituent of ribosome);GO:0005840(ribosome);GO:0006412(translation);GO:0006412(translation)	NA	NA	NA		protein_coding	0.0001	0.0001	0.0001	0.661466	0.501972	0.253806	0.000211678	-12.2058	1.31153e-17	7.064e-16	down	yes
Zm00001d033786	Zm00001d033786	Zm00001d033786_T001;Zm00001d033786_T004;Zm00001d033786_T005;Zm00001d033786_T002;Zm00001d033786_T003	GO:0000155(phosphorelay sensor kinase activity);GO:0000160(phosphorelay signal transduction system);GO:0005622(intracellular);GO:0007165(signal transduction);GO:0016020(membrane);GO:0016021(integral component of membrane);GO:0016301(kinase activity);GO:0016310(phosphorylation);GO:0016772(transferase activity, transferring phosphorus-containing groups);GO:0023014(signal transduction by protein pho…	04075(Plant hormone signal transduction);04075(Plant hormone signal transduction)	K14489	EC:2.7.13.3	histidine kinase4	protein_coding	0.0362808	0.228448	0.404618	5.94586	8.12917	7.28498	0.0313364	-4.99602	1.41177e-17	7.58468e-16	down	yes
Zm00001d037921	Zm00001d037921	Zm00001d037921_T001;Zm00001d037921_T002	GO:0016020(membrane);GO:0016021(integral component of membrane);GO:0016021(integral component of membrane)	NA	NA	NA		protein_coding	0.091238	0.0001	0.1193	7.13626	4.4767	9.11844	0.0101603	-6.62091	1.69005e-17	9.0569e-16	down	yes
Zm00001d052677	Zm00001d052677	Zm00001d052677_T002;Zm00001d052677_T001	NA	NA	NA	NA		protein_coding	0.0001	0.0001	0.0001	5.82484	5.95229	7.33536	1.56965e-05	-15.9592	1.72872e-17	9.24081e-16	down	yes
Zm00001d016068	Zm00001d016068	Zm00001d016068_T001	GO:0003747(translation release factor activity);GO:0006415(translational termination)	NA	NA	NA	Peptide chain release factor PrfB1 chloroplastic	protein_coding	1.9885	2.82872	2.60139	0.0001	0.0001	0.0001	24728.7	14.5939	1.7575e-17	9.37112e-16	up	yes
Zm00001d035819	Zm00001d035819	Zm00001d035819_T001	NA	NA	NA	NA	BTB/POZ and TAZ domain-containing protein 3	protein_coding	0.0001	0.095155	0.0001	5.11189	5.64358	6.89873	0.00540126	-7.53249	1.76838e-17	9.40559e-16	down	yes
Zm00001d018546	Zm00001d018546	Zm00001d018546_T001	GO:0003676(nucleic acid binding);GO:0003723(RNA binding);GO:0003729(mRNA binding);GO:0005829(cytosol)	NA	NA	NA	Polyadenylate-binding protein RBP45C	protein_coding	0.0001	0.0001	0.0001	7.06462	5.98952	8.74015	1.37651e-05	-16.1486	1.82405e-17	9.67748e-16	down	yes
Zm00001d029237	Zm00001d029237	Zm00001d029237_T006;Zm00001d029237_T011;Zm00001d029237_T002;Zm00001d029237_T001;Zm00001d029237_T007;Zm00001d029237_T008;Zm00001d029237_T003;Zm00001d029237_T004;Zm00001d029237_T009;Zm00001d029237_T005	GO:0003824(catalytic activity);GO:0005829(cytosol);GO:0006520(cellular amino acid metabolic process);GO:0006545(glycine biosynthetic process);GO:0006567(threonine catabolic process);GO:0008732(L-allo-threonine aldolase activity);GO:0016829(lyase activity);GO:0016829(lyase activity)	NA	NA	NA	Probable low-specificity L-threonine aldolase 1	protein_coding	1.21155	0.848899	1.04888	0.0001	0.0127708	0.0001	239.718	7.90519	1.89983e-17	1.00544e-15	up	yes
Zm00001d038017	Zm00001d038017	Zm00001d038017_T001	GO:0002181(cytoplasmic translation);GO:0003735(structural constituent of ribosome);GO:0005840(ribosome);GO:0006412(translation);GO:0015934(large ribosomal subunit);GO:0022625(cytosolic large ribosomal subunit)	NA	NA	NA	60S ribosomal protein L17-2	protein_coding	0.0001	0.0001	0.0001	5.78062	3.23209	8.02584	1.76071e-05	-15.7935	1.94549e-17	1.0248e-15	down	yes
Zm00001d029886	Zm00001d029886	Zm00001d029886_T001	NA	NA	NA	NA		protein_coding	3.72392	1.75891	2.595	0.0001	0.0001	0.0001	26926.1	14.7167	1.94603e-17	1.0248e-15	up	yes
Zm00001d012667	Zm00001d012667	Zm00001d012667_T024;Zm00001d012667_T005;Zm00001d012667_T018;Zm00001d012667_T031;Zm00001d012667_T002;Zm00001d012667_T030;Zm00001d012667_T009;Zm00001d012667_T001;Zm00001d012667_T010;Zm00001d012667_T017;Zm00001d012667_T023;Zm00001d012667_T019;Zm00001d012667_T007;Zm00001d012667_T029;Zm00001d012667_T012;Zm00001d012667_T028;Zm00001d012667_T026;Zm00001d012667_T003;Zm00001d012667_T008;Zm00001d012667_T027…	GO:0006508(proteolysis);GO:0008236(serine-type peptidase activity);GO:0008239(dipeptidyl-peptidase activity);GO:0016020(membrane);GO:0016021(integral component of membrane);GO:0019903(protein phosphatase binding);GO:0043666(regulation of phosphoprotein phosphatase activity);GO:0043666(regulation of phosphoprotein phosphatase activity)	NA	NA	NA	Putative serine peptidase S28 family protein	protein_coding	6.67002	7.63991	8.58993	0.884549	0.451798	0.871135	10.3738	3.37487	1.98681e-17	1.04369e-15	up	yes
Zm00001d016691	Zm00001d016691	Zm00001d016691_T001;Zm00001d016691_T002;Zm00001d016691_T003	GO:0006878(cellular copper ion homeostasis);GO:0009507(chloroplast);GO:0009651(response to salt stress);GO:0019904(protein domain specific binding);GO:0030001(metal ion transport);GO:0046686(response to cadmium ion);GO:0046872(metal ion binding);GO:0048046(apoplast);GO:0048046(apoplast)	NA	NA	NA	Copper transport protein CCH	protein_coding	981.837	610.443	620.565	61.5009	53.3518	55.7599	12.97	3.69711	2.05041e-17	1.07444e-15	up	yes
Zm00001d021899	Zm00001d021899	Zm00001d021899_T001;Zm00001d021899_T002	GO:0016787(hydrolase activity);GO:0016787(hydrolase activity)	NA	NA	NA	alpha/beta-Hydrolases superfamily protein	protein_coding	2.28127	1.68443	1.78777	20.153	17.3281	21.2799	0.0979129	-3.35236	2.19856e-17	1.14925e-15	down	yes
Zm00001d052819	Zm00001d052819	Zm00001d052819_T001	GO:0005886(plasma membrane);GO:0009834(plant-type secondary cell wall biogenesis)	NA	NA	NA	Fasciclin-like arabinogalactan protein 10	protein_coding	16.4663	7.03242	6.89279	0.053338	0.116761	0.0001	178.565	7.4803	2.21106e-17	1.15295e-15	up	yes
Zm00001d030096	Zm00001d030096	Zm00001d030096_T001;Zm00001d030096_T002	NA	NA	NA	NA		protein_coding	1.09614	2.18907	1.49628	0.0001	0.0001	0.0001	15938.3	13.9602	2.33779e-17	1.21605e-15	up	yes
Zm00001d046322	Zm00001d046322	Zm00001d046322_T001	GO:0016491(oxidoreductase activity);GO:0050660(flavin adenine dinucleotide binding);GO:0055114(oxidation-reduction process);GO:0071949(FAD binding)	NA	NA	NA	Putative FAD-binding Berberine family protein	protein_coding	1.57489	1.01672	1.46217	16.2577	24.0545	12.7168	0.0764446	-3.70944	2.51729e-17	1.30623e-15	down	yes
Zm00001d019111	Zm00001d019111	Zm00001d019111_T009;Zm00001d019111_T003;Zm00001d019111_T005;Zm00001d019111_T001;Zm00001d019111_T004;Zm00001d019111_T006;Zm00001d019111_T002;Zm00001d019111_T010;Zm00001d019111_T008;Zm00001d019111_T007	GO:0003723(RNA binding);GO:0003735(structural constituent of ribosome);GO:0006412(translation);GO:0016020(membrane);GO:0016021(integral component of membrane);GO:0022627(cytosolic small ribosomal subunit);GO:0022627(cytosolic small ribosomal subunit)	NA	NA	NA		protein_coding	0.0237365	0.0868503	0.0486429	1.34929	4.55004	1.90333	0.0204071	-5.61479	2.76875e-17	1.43321e-15	down	yes
Zm00001d023375	Zm00001d023375	Zm00001d023375_T001	NA	NA	NA	NA		protein_coding	0.0001	0.0001	0.0001	3.71152	3.04259	3.83852	2.83216e-05	-15.1077	2.90748e-17	1.50138e-15	down	yes
Zm00001d046706	Zm00001d046706	Zm00001d046706_T001	GO:0016491(oxidoreductase activity);GO:0016616(oxidoreductase activity, acting on the CH-OH group of donors, NAD or NADP as acceptor);GO:0055114(oxidation-reduction process)	NA	NA	NA	Dihydroflavonol-4-reductase	protein_coding	0.0001	0.0001	0.0001	6.57416	5.94936	4.95864	1.71603e-05	-15.8306	3.03556e-17	1.56372e-15	down	yes
Zm00001d015671	Homeobox-transcription factor 27	Zm00001d015671_T001	GO:0016567(protein ubiquitination);GO:0016874(ligase activity);GO:0061630(ubiquitin protein ligase activity)	NA	NA	NA	Probable E3 ubiquitin-protein ligase LOG2	protein_coding	2.29018	3.45797	4.29707	26.5417	24.9064	26.9439	0.128141	-2.9642	3.34726e-17	1.72012e-15	down	yes
Zm00001d052443	Zm00001d052443	Zm00001d052443_T002;Zm00001d052443_T001	GO:0000166(nucleotide binding);GO:0005525(GTP binding);GO:0016020(membrane);GO:0016021(integral component of membrane);GO:0016021(integral component of membrane)	NA	NA	NA		protein_coding	3.01928	2.85791	3.72737	0.0001	0.0001	0.0001	32015.2	14.9665	3.41035e-17	1.74832e-15	up	yes
Zm00001d027221	Zm00001d027221	Zm00001d027221_T001	NA	NA	NA	NA		lincRNA	0.0001	0.0001	0.0001	4.78724	6.72002	3.27068	2.03005e-05	-15.5881	3.51694e-17	1.79863e-15	down	yes
Zm00001d036932	Zm00001d036932	Zm00001d036932_T004;Zm00001d036932_T003;Zm00001d036932_T002;Zm00001d036932_T001	GO:0016020(membrane);GO:0016021(integral component of membrane);GO:0016021(integral component of membrane)	NA	NA	NA		protein_coding	0.728017	1.95804	1.60859	0.0001	0.0001	0.0001	14315.5	13.8053	3.66969e-17	1.87224e-15	up	yes
Zm00001d049453	Zm00001d049453	Zm00001d049453_T001	NA	NA	NA	NA		protein_coding	0.0001	0.0001	0.0001	5.06797	5.6374	5.63179	1.8363e-05	-15.7328	3.78821e-17	1.92809e-15	down	yes
Zm00001d011165	Zm00001d011165	Zm00001d011165_T002;Zm00001d011165_T001	GO:0005666(RNA polymerase III complex);GO:0006383(transcription by RNA polymerase III);GO:0006383(transcription by RNA polymerase III)	03020(RNA polymerase);03020(RNA polymerase)	K03025	NA	DNA binding;DNA-directed RNA polymerases	protein_coding	1.8158	1.9006	1.00605	0.0001	0.0001	0.0001	15741.5	13.9423	3.89773e-17	1.9791e-15	up	yes
Zm00001d028179	Zm00001d028179	Zm00001d028179_T001	NA	NA	NA	NA		protein_coding	0.0001	0.0001	0.0001	9.6143	7.05752	10.3357	1.1108e-05	-16.458	3.92525e-17	1.98833e-15	down	yes
Zm00001d024314	Zm00001d024314	Zm00001d024314_T001;Zm00001d024314_T002	GO:0008270(zinc ion binding);GO:0009809(lignin biosynthetic process);GO:0016491(oxidoreductase activity);GO:0016616(oxidoreductase activity, acting on the CH-OH group of donors, NAD or NADP as acceptor);GO:0045551(cinnamyl-alcohol dehydrogenase activity);GO:0046872(metal ion binding);GO:0055114(oxidation-reduction process);GO:0055114(oxidation-reduction process)	NA	NA	NA	Putative cinnamyl-alcohol dehydrogenase family protein	protein_coding	10.9997	31.2532	26.881	1.12802	1.81624	2.25014	13.3093	3.73436	3.95968e-17	2.001e-15	up	yes
Zm00001d013387	Zm00001d013387	Zm00001d013387_T001	GO:0000398(mRNA splicing, via spliceosome);GO:0003723(RNA binding);GO:0003743(translation initiation factor activity);GO:0006413(translational initiation);GO:0071006(U2-type catalytic step 1 spliceosome);GO:0071013(catalytic step 2 spliceosome)	NA	NA	NA	Initiation factor eIF-4 gamma MA3	protein_coding	0.0001	0.0001	0.0001	1.42829	1.93952	2.57251	5.05024e-05	-14.2733	4.22406e-17	2.12955e-15	down	yes
Zm00001d045175	Zm00001d045175	Zm00001d045175_T001	GO:0016301(kinase activity);GO:0016310(phosphorylation)	NA	NA	NA	Putative leucine-rich repeat receptor protein kinase family protein	protein_coding	7.68149	4.96971	6.24928	0.0001	0.0001	0.0001	63001.6	15.9431	4.40561e-17	2.21583e-15	up	yes
Zm00001d036486	Zm00001d036486	Zm00001d036486_T001	NA	NA	NA	NA	Mitochondrial transcription termination factor family protein	protein_coding	3.4174	5.12452	6.49906	0.0001	0.0001	0.0001	50136.6	15.6136	4.63617e-17	2.32628e-15	up	yes
Zm00001d031300	Zm00001d031300	Zm00001d031300_T003;Zm00001d031300_T002;Zm00001d031300_T001	GO:0003824(catalytic activity);GO:0010325(raffinose family oligosaccharide biosynthetic process);GO:0016740(transferase activity);GO:0016757(transferase activity, transferring glycosyl groups);GO:0047274(galactinol-sucrose galactosyltransferase activity);GO:0047274(galactinol-sucrose galactosyltransferase activity)	00052(Galactose metabolism);00052(Galactose metabolism)	K06617	EC:2.4.1.82	Probable galactinol--sucrose galactosyltransferase 1	protein_coding	42.3702	61.6314	38.6086	1.70704	4.40496	1.22937	19.4255	4.27988	4.92887e-17	2.46733e-15	up	yes
Zm00001d044613	Zm00001d044613	Zm00001d044613_T001	NA	NA	NA	NA		protein_coding	0.0001	0.0001	0.0001	5.03162	4.73336	3.48895	2.26348e-05	-15.4311	5.60766e-17	2.80054e-15	down	yes
Zm00001d045523	Zm00001d045523	Zm00001d045523_T002;Zm00001d045523_T001	NA	NA	NA	NA		protein_coding	3.69077	2.65654	3.64629	0.0001	0.0001	0.0001	33312	15.0238	6.26696e-17	3.12247e-15	up	yes
Zm00001d016006	Zm00001d016006	Zm00001d016006_T001	GO:0003824(catalytic activity);GO:0004084(branched-chain-amino-acid transaminase activity);GO:0005829(cytosol);GO:0008153(para-aminobenzoic acid biosynthetic process);GO:0009082(branched-chain amino acid biosynthetic process);GO:0009570(chloroplast stroma)	NA	NA	NA	D-amino-acid transaminase chloroplastic	protein_coding	1.5028	1.82217	3.05585	20.6973	18.0961	17.5899	0.113169	-3.14345	6.39511e-17	3.17888e-15	down	yes
Zm00001d052818	Zm00001d052818	Zm00001d052818_T001	GO:0005886(plasma membrane);GO:0009834(plant-type secondary cell wall biogenesis)	NA	NA	NA	Fasciclin-like arabinogalactan protein 2	protein_coding	3.08547	9.30419	4.5807	0.044568	0.051209	0.0001	177.001	7.46762	6.62521e-17	3.28558e-15	up	yes
Zm00001d003784	Zm00001d003784	Zm00001d003784_T001	GO:0004553(hydrolase activity, hydrolyzing O-glycosyl compounds);GO:0005975(carbohydrate metabolic process);GO:0016020(membrane);GO:0016021(integral component of membrane);GO:0016787(hydrolase activity);GO:0046658(anchored component of plasma membrane)	NA	NA	NA	Glucan endo-13-beta-glucosidase 14	protein_coding	2.28069	2.29569	2.94229	0.0001	0.034196	0.0001	218.591	7.77209	6.64331e-17	3.28689e-15	up	yes
Zm00001d036389	Zm00001d036389	Zm00001d036389_T001	NA	NA	NA	NA		protein_coding	0.0001	0.0001	0.0001	6.62542	10.1258	9.28452	1.15226e-05	-16.4052	7.15191e-17	3.53032e-15	down	yes
Zm00001d017576	Zm00001d017576	Zm00001d017576_T001	NA	NA	NA	NA	Remorin family protein	protein_coding	0.0001	0.0001	0.0001	8.90741	4.16578	3.28477	1.83397e-05	-15.7347	7.18398e-17	3.53794e-15	down	yes
Zm00001d032606	Zm00001d032606	Zm00001d032606_T002;Zm00001d032606_T001;Zm00001d032606_T003	NA	NA	NA	NA		protein_coding	0.533501	1.27381	0.837932	0.0001	0.0001	0.0001	8817.47	13.1061	1.05359e-16	5.1767e-15	up	yes
Zm00001d005920	carbonic anhydrase4	Zm00001d005920_T006;Zm00001d005920_T004;Zm00001d005920_T003;Zm00001d005920_T002;Zm00001d005920_T001;Zm00001d005920_T005	GO:0004089(carbonate dehydratase activity);GO:0005737(cytoplasm);GO:0008270(zinc ion binding);GO:0009440(cyanate catabolic process);GO:0010037(response to carbon dioxide);GO:0010119(regulation of stomatal movement);GO:0015976(carbon utilization);GO:0016829(lyase activity);GO:0016829(lyase activity)	00910(Nitrogen metabolism);00910(Nitrogen metabolism)	K01673	EC:4.2.1.1	carbonic anhydrase4	protein_coding	33.4436	36.894	45.6871	2.38363	5.17079	3.0524	10.9387	3.45137	1.20333e-16	5.89879e-15	up	yes
Zm00001d044921	Zm00001d044921	Zm00001d044921_T001	GO:0009056(catabolic process);GO:0016787(hydrolase activity)	NA	NA	NA	Probable carboxylesterase 2	protein_coding	17.8761	34.4429	32.385	3.90712	1.99765	3.1196	9.38614	3.23053	1.24985e-16	6.11277e-15	up	yes
Zm00001d051280	Zm00001d051280	Zm00001d051280_T001	GO:0003735(structural constituent of ribosome);GO:0005840(ribosome);GO:0006412(translation)	NA	NA	NA	60S ribosomal protein L23	protein_coding	0.0001	0.0001	0.0001	7.34704	8.78546	5.06065	1.41555e-05	-16.1083	1.27232e-16	6.19875e-15	down	yes
Zm00001d007485	Zm00001d007485	Zm00001d007485_T001	GO:0005515(protein binding);GO:0016020(membrane);GO:0016021(integral component of membrane);GO:0016301(kinase activity);GO:0016310(phosphorylation)	NA	NA	NA	LRR receptor-like serine/threonine-protein kinase GSO2	protein_coding	0.663539	1.00427	1.12636	0.0001	0.0001	0.0001	9313.91	13.1852	1.27326e-16	6.19875e-15	up	yes
Zm00001d050623	Zm00001d050623	Zm00001d050623_T001	GO:0004812(aminoacyl-tRNA ligase activity)	NA	NA	NA	Methionyl-tRNA synthetase	protein_coding	0.0001	0.121803	0.0001	18.0771	18.4765	11.7273	0.00252694	-8.62839	1.27861e-16	6.21059e-15	down	yes
Zm00001d036420	Zm00001d036420	Zm00001d036420_T005;Zm00001d036420_T002;Zm00001d036420_T008;Zm00001d036420_T004;Zm00001d036420_T006;Zm00001d036420_T001;Zm00001d036420_T003;Zm00001d036420_T009;Zm00001d036420_T007;Zm00001d036420_T010	GO:0016020(membrane);GO:0016021(integral component of membrane);GO:0016021(integral component of membrane)	NA	NA	NA		protein_coding	0.0156049	0.0001	0.0001	0.634058	1.99215	2.10331	0.00334175	-8.22518	1.44952e-16	7.0247e-15	down	yes
Zm00001d003311	Zm00001d003311	Zm00001d003311_T001	GO:0009852(auxin catabolic process);GO:0010252(auxin homeostasis);GO:0016491(oxidoreductase activity);GO:0046872(metal ion binding);GO:0050302(indole-3-acetaldehyde oxidase activity);GO:0051213(dioxygenase activity);GO:0055114(oxidation-reduction process)	NA	NA	NA	Probable 2-oxoglutarate-dependent dioxygenase AOP1	protein_coding	1.95317	2.18574	1.88561	24.5308	13.0499	16.3506	0.111708	-3.1622	1.49288e-16	7.2184e-15	down	yes
Zm00001d016588	Zm00001d016588	Zm00001d016588_T001;Zm00001d016588_T006;Zm00001d016588_T004;Zm00001d016588_T005;Zm00001d016588_T003;Zm00001d016588_T002	GO:0006629(lipid metabolic process);GO:0008081(phosphoric diester hydrolase activity);GO:0046475(glycerophospholipid catabolic process);GO:0046475(glycerophospholipid catabolic process)	00564(Glycerophospholipid metabolism);00564(Glycerophospholipid metabolism)	K18696	EC:3.1.4.46	Glycerophosphodiester phosphodiesterase GDPD2	protein_coding	63.1606	184.759	218.414	9.8426	8.86115	13.2729	14.5836	3.86627	1.53914e-16	7.42524e-15	up	yes
Zm00001d031953	Zm00001d031953	Zm00001d031953_T008;Zm00001d031953_T009;Zm00001d031953_T003;Zm00001d031953_T002;Zm00001d031953_T001;Zm00001d031953_T007;Zm00001d031953_T006;Zm00001d031953_T004;Zm00001d031953_T005	GO:0005515(protein binding);GO:0005623(cell);GO:0009055(electron transfer activity);GO:0009507(chloroplast);GO:0015035(protein disulfide oxidoreductase activity);GO:0016020(membrane);GO:0016021(integral component of membrane);GO:0016740(transferase activity);GO:0022900(electron transport chain);GO:0045454(cell redox homeostasis);GO:0055114(oxidation-reduction process);GO:0055114(oxidation-reducti…	NA	NA	NA	Thioredoxin family protein	protein_coding	1.2405	1.77669	2.03183	11.6207	13.4632	21.762	0.107779	-3.21385	1.67775e-16	8.07559e-15	down	yes
Zm00001d006506	Zm00001d006506	Zm00001d006506_T002;Zm00001d006506_T001	NA	NA	NA	NA		protein_coding	2.6216	2.48798	3.63525	0.0001	0.0001	0.0001	29149.5	14.8312	1.68928e-16	8.11275e-15	up	yes
Zm00001d040069	Zm00001d040069	Zm00001d040069_T001	GO:0006486(protein glycosylation);GO:0010417(glucuronoxylan biosynthetic process);GO:0016740(transferase activity);GO:0016757(transferase activity, transferring glycosyl groups)	NA	NA	NA	Probable glucuronoxylan glucuronosyltransferase IRX7	protein_coding	0.0001	0.0001	0.0001	6.69311	5.43363	6.50198	1.61042e-05	-15.9222	1.72109e-16	8.24688e-15	down	yes
Zm00001d051269	MYB-transcription factor 103	Zm00001d051269_T001	GO:0000976(transcription regulatory region sequence-specific DNA binding);GO:0003677(DNA binding);GO:0003700(DNA-binding transcription factor activity);GO:0005634(nucleus);GO:0006355(regulation of transcription, DNA-templated);GO:0030154(cell differentiation);GO:0043565(sequence-specific DNA binding);GO:0044212(transcription regulatory region DNA binding)	NA	K09422	NA	myb domain protein 17	protein_coding	0.0001	0.0001	0.0001	1.59932	2.08331	1.53246	5.75255e-05	-14.0854	1.73951e-16	8.31643e-15	down	yes
Zm00001d047696	Zm00001d047696	Zm00001d047696_T001	NA	NA	NA	NA	senescence associated gene 20	protein_coding	30.0729	30.1401	32.6206	3.01322	1.08762	2.59424	13.8659	3.79347	1.79724e-16	8.57314e-15	up	yes
Zm00001d038564	Zm00001d038564	Zm00001d038564_T001	NA	NA	NA	NA		protein_coding	3.92574	2.74779	3.85717	0.0001	0.0001	0.0001	35102.3	15.0993	1.84321e-16	8.77279e-15	up	yes
Zm00001d035703	Zm00001d035703	Zm00001d035703_T001	NA	NA	NA	NA	GBF-interacting protein 1	protein_coding	0.0001	0.0001	0.0001	2.73149	2.07053	2.68047	4.00936e-05	-14.6063	1.85174e-16	8.79371e-15	down	yes
Zm00001d048476	Zm00001d048476	Zm00001d048476_T001	GO:0008374(O-acyltransferase activity);GO:0016020(membrane);GO:0016021(integral component of membrane);GO:0016740(transferase activity);GO:0016746(transferase activity, transferring acyl groups)	NA	NA	NA	Acyltransferase	protein_coding	2.64564	3.36315	2.03979	0.0001	0.0001	0.0001	26828.6	14.7115	2.11022e-16	9.99887e-15	up	yes
Zm00001d012357	Zm00001d012357	Zm00001d012357_T002;Zm00001d012357_T001	GO:0003824(catalytic activity);GO:0005227(calcium activated cation channel activity);GO:0005886(plasma membrane);GO:0006886(intracellular protein transport);GO:0015031(protein transport);GO:0016020(membrane);GO:0016021(integral component of membrane);GO:0016192(vesicle-mediated transport);GO:0016829(lyase activity);GO:0030117(membrane coat);GO:0034220(ion transmembrane transport);GO:0098655(catio…	NA	NA	NA		protein_coding	3.05605	2.06057	1.67661	0.0001	0.0001	0.0001	22644.1	14.4668	2.18382e-16	1.03246e-14	up	yes
Zm00001d047087	beta expansin8	Zm00001d047087_T004;Zm00001d047087_T003;Zm00001d047087_T001;Zm00001d047087_T005;Zm00001d047087_T002	GO:0005576(extracellular region);GO:0016020(membrane);GO:0016021(integral component of membrane);GO:0019953(sexual reproduction);GO:0019953(sexual reproduction)	NA	NA	NA	beta expansin8	protein_coding	15.4979	4.74242	16.6676	0.366876	0.659192	0.363851	26.554	4.73086	2.2039e-16	1.03965e-14	up	yes
Zm00001d020274	Zm00001d020274	Zm00001d020274_T001	GO:0005739(mitochondrion);GO:0033617(mitochondrial respiratory chain complex IV assembly)	NA	NA	NA	Protein SCO1 homolog 2 mitochondrial	protein_coding	0.0001	0.0001	0.0001	6.27527	7.23292	2.88347	1.8302e-05	-15.7376	2.47531e-16	1.1651e-14	down	yes
Zm00001d041794	Zm00001d041794	Zm00001d041794_T001	NA	NA	NA	NA		protein_coding	30.9069	110.908	74.7952	6.67382	6.83485	6.58067	10.7823	3.4306	2.51732e-16	1.18225e-14	up	yes
Zm00001d046434	Zm00001d046434	Zm00001d046434_T006;Zm00001d046434_T002;Zm00001d046434_T004;Zm00001d046434_T007;Zm00001d046434_T005;Zm00001d046434_T001;Zm00001d046434_T003	GO:0000062(fatty-acyl-CoA binding);GO:0005515(protein binding);GO:0005829(cytosol);GO:0006869(lipid transport);GO:0006869(lipid transport)	NA	NA	NA	Acyl-CoA-binding domain-containing protein 4	protein_coding	3.69312	9.15283	6.77891	0.548096	0.300963	0.548103	14.0462	3.81211	2.6098e-16	1.22028e-14	up	yes
Zm00001d006368	Zm00001d006368	Zm00001d006368_T003;Zm00001d006368_T001;Zm00001d006368_T002	GO:0006511(ubiquitin-dependent protein catabolic process);GO:0016020(membrane);GO:0016021(integral component of membrane);GO:0016567(protein ubiquitination);GO:0061630(ubiquitin protein ligase activity);GO:0061630(ubiquitin protein ligase activity)	NA	NA	NA	NEP1-interacting protein-like 1	protein_coding	46.8263	74.1018	72.6518	8.10179	5.35624	9.06132	8.59616	3.10369	2.61254e-16	1.22028e-14	up	yes
Zm00001d023343	phospholipid transfer protein homolog1	Zm00001d023343_T001;Zm00001d023343_T002	GO:0006869(lipid transport);GO:0008289(lipid binding);GO:0016020(membrane);GO:0016020(membrane)	NA	NA	NA	phospholipid transfer protein homolog1	protein_coding	465.153	1464.14	1410.19	75.5105	63.3919	22.9008	20.6392	4.36731	2.61549e-16	1.22028e-14	up	yes
Zm00001d013548	Zm00001d013548	Zm00001d013548_T001;Zm00001d013548_T002	GO:0000245(spliceosomal complex assembly);GO:0000398(mRNA splicing, via spliceosome);GO:0000974(Prp19 complex);GO:0005515(protein binding);GO:0006396(RNA processing);GO:0071007(U2-type catalytic step 2 spliceosome);GO:0071013(catalytic step 2 spliceosome);GO:0071014(post-mRNA release spliceosomal complex);GO:0071014(post-mRNA release spliceosomal complex)	NA	NA	NA	Tetratricopeptide repeat (TPR)-like superfamily protein	protein_coding	0.0001	0.0001	0.0001	0.934326	1.10192	0.949221	0.000100487	-13.2807	2.71783e-16	1.26525e-14	down	yes
Zm00001d009114	Zm00001d009114	Zm00001d009114_T001	GO:0004175(endopeptidase activity);GO:0005887(integral component of plasma membrane);GO:0016021(integral component of membrane);GO:0016485(protein processing)	NA	NA	NA	Nicastrin	protein_coding	0.0001	0.0001	0.069059	5.56189	2.9357	4.42357	0.00536012	-7.54352	2.72961e-16	1.26796e-14	down	yes
Zm00001d040851	Zm00001d040851	Zm00001d040851_T001	GO:0005515(protein binding)	NA	NA	NA		protein_coding	0.0001	0.0001	0.0001	3.14697	2.41139	2.4452	3.74833e-05	-14.7034	2.85219e-16	1.32201e-14	down	yes
Zm00001d012098	Zm00001d012098	Zm00001d012098_T001;Zm00001d012098_T002;Zm00001d012098_T003	GO:0003676(nucleic acid binding);GO:0003723(RNA binding);GO:0005654(nucleoplasm);GO:0043484(regulation of RNA splicing);GO:1990904(ribonucleoprotein complex);GO:1990904(ribonucleoprotein complex)	NA	K12898	NA	RNA-binding (RRM/RBD/RNP motifs) family protein	protein_coding	6.07669	7.30813	10.1213	0.564842	0.253732	0.562316	17.0224	4.08937	3.15396e-16	1.45871e-14	up	yes
Zm00001d023402	G2-like-transcription factor 4	Zm00001d023402_T001;Zm00001d023402_T002	GO:0003677(DNA binding);GO:0005634(nucleus);GO:0016020(membrane);GO:0016021(integral component of membrane);GO:0016021(integral component of membrane)	NA	NA	NA	Putative MYB DNA-binding domain superfamily protein	protein_coding	32.3786	71.8673	91.424	6.9101	3.47613	5.7466	12.1287	3.60035	3.59345e-16	1.65837e-14	up	yes
Zm00001d031529	Zm00001d031529	Zm00001d031529_T010;Zm00001d031529_T019;Zm00001d031529_T009;Zm00001d031529_T016;Zm00001d031529_T015;Zm00001d031529_T005;Zm00001d031529_T018;Zm00001d031529_T014;Zm00001d031529_T011;Zm00001d031529_T007;Zm00001d031529_T006;Zm00001d031529_T017;Zm00001d031529_T002;Zm00001d031529_T004;Zm00001d031529_T012	GO:0003723(RNA binding);GO:0003729(mRNA binding);GO:0005737(cytoplasm);GO:0010608(posttranscriptional regulation of gene expression);GO:0010608(posttranscriptional regulation of gene expression)	NA	NA	NA	Pumilio homolog 5	protein_coding	7.04736	9.04362	6.947	0.933592	1.26496	0.785895	7.71934	2.94848	3.66636e-16	1.68835e-14	up	yes
Zm00001d006841	Zm00001d006841	Zm00001d006841_T001	GO:0003824(catalytic activity);GO:0016787(hydrolase activity)	NA	NA	NA	alpha/beta-Hydrolases superfamily protein	protein_coding	4.14522	1.94075	5.69979	0.0001	0.0001	0.03685	318.104	8.31336	3.7996e-16	1.74593e-14	up	yes
Zm00001d020387	Zm00001d020387	Zm00001d020387_T001	NA	NA	NA	NA	Remorin family protein	protein_coding	0.0001	0.0001	0.0001	8.29449	3.86723	2.88168	1.99423e-05	-15.6138	3.86505e-16	1.77218e-14	down	yes
Zm00001d011443	Zm00001d011443	Zm00001d011443_T001	GO:0003824(catalytic activity);GO:0008610(lipid biosynthetic process);GO:0016020(membrane);GO:0016021(integral component of membrane);GO:0016874(ligase activity)	NA	NA	NA	Putative AMP-dependent synthetase and ligase superfamily protein	protein_coding	0.9307	3.06685	3.41531	0.021948	0.0001	0.0001	334.697	8.38671	3.89417e-16	1.78169e-14	up	yes
Zm00001d038819	Zm00001d038819	Zm00001d038819_T056;Zm00001d038819_T050;Zm00001d038819_T033;Zm00001d038819_T038;Zm00001d038819_T005;Zm00001d038819_T009;Zm00001d038819_T022;Zm00001d038819_T013;Zm00001d038819_T029;Zm00001d038819_T052;Zm00001d038819_T053;Zm00001d038819_T012;Zm00001d038819_T026;Zm00001d038819_T007;Zm00001d038819_T016;Zm00001d038819_T020;Zm00001d038819_T017;Zm00001d038819_T003;Zm00001d038819_T045;Zm00001d038819_T008…	GO:0005634(nucleus);GO:0006281(DNA repair);GO:0006310(DNA recombination);GO:0006974(cellular response to DNA damage stimulus);GO:0030915(Smc5-Smc6 complex);GO:2001022(positive regulation of response to DNA damage stimulus);GO:2001022(positive regulation of response to DNA damage stimulus)	NA	K22825	NA	Non-structural maintenance of chromosomes element 4 homolog A	protein_coding	0.0001	0.0167849	0.0001	0.694346	0.870699	0.698445	0.00750386	-7.05815	3.98457e-16	1.81656e-14	down	yes
Zm00001d042113	Zm00001d042113	Zm00001d042113_T006;Zm00001d042113_T001;Zm00001d042113_T005;Zm00001d042113_T003;Zm00001d042113_T002;Zm00001d042113_T004	GO:0000398(mRNA splicing, via spliceosome);GO:0000470(maturation of LSU-rRNA);GO:0003723(RNA binding);GO:0005634(nucleus);GO:0005730(nucleolus);GO:0005840(ribosome);GO:0030490(maturation of SSU-rRNA);GO:0031428(box C/D snoRNP complex);GO:0032040(small-subunit processome);GO:0046540(U4/U6 x U5 tri-snRNP complex);GO:0071011(precatalytic spliceosome);GO:0071011(precatalytic spliceosome)	NA	NA	NA	Ribosomal protein L7Ae/L30e/S12e/Gadd45 family protein	protein_coding	0.0001	0.0001	0.0001	1.07801	1.47795	1.67341	7.09325e-05	-13.7832	3.98746e-16	1.81656e-14	down	yes
Zm00001d050406	Zm00001d050406	Zm00001d050406_T007;Zm00001d050406_T002;Zm00001d050406_T001;Zm00001d050406_T009;Zm00001d050406_T004;Zm00001d050406_T003;Zm00001d050406_T005;Zm00001d050406_T006;Zm00001d050406_T008	GO:0005794(Golgi apparatus);GO:0016020(membrane);GO:0016021(integral component of membrane);GO:0016757(transferase activity, transferring glycosyl groups);GO:0051753(mannan synthase activity);GO:0097502(mannosylation);GO:0097502(mannosylation)	NA	K13680	EC:2.4.1.32	Probable mannan synthase 7	protein_coding	1.16881	3.41642	2.88025	0.0482058	0.0236104	0.0001	103.808	6.69777	4.11778e-16	1.87192e-14	up	yes
Zm00001d028035	Zm00001d028035	Zm00001d028035_T001	GO:0003676(nucleic acid binding);GO:0016020(membrane);GO:0016021(integral component of membrane);GO:0016301(kinase activity);GO:0016310(phosphorylation)	NA	NA	NA		protein_coding	0.091411	0.309876	0.337896	7.26483	4.55448	7.30295	0.0386556	-4.69318	4.15154e-16	1.88324e-14	down	yes
Zm00001d013557	Zm00001d013557	Zm00001d013557_T001	GO:0009058(biosynthetic process);GO:0016844(strictosidine synthase activity)	NA	NA	NA	Digalactosyldiacylglycerol synthase 1 chloroplastic	protein_coding	0.0001	0.080108	0.0001	4.65638	3.95132	4.72168	0.00602488	-7.37485	4.46852e-16	2.02272e-14	down	yes
Zm00001d010567	Zm00001d010567	Zm00001d010567_T002;Zm00001d010567_T001;Zm00001d010567_T005;Zm00001d010567_T010;Zm00001d010567_T012;Zm00001d010567_T003;Zm00001d010567_T004;Zm00001d010567_T011;Zm00001d010567_T006;Zm00001d010567_T009	GO:0000166(nucleotide binding);GO:0000724(double-strand break repair via homologous recombination);GO:0003677(DNA binding);GO:0003688(DNA replication origin binding);GO:0003697(single-stranded DNA binding);GO:0005524(ATP binding);GO:0005634(nucleus);GO:0006260(DNA replication);GO:0006270(DNA replication initiation);GO:0007140(male meiotic nuclear division);GO:0007143(female meiotic nuclear divisi…	NA	NA	NA	minichromosome maintenance 8	protein_coding	1.7721	3.33445	2.87335	0.0275692	0.15372	0.0653288	32.3574	5.01602	4.55276e-16	2.05647e-14	up	yes
Zm00001d043649	Zm00001d043649	Zm00001d043649_T008;Zm00001d043649_T065;Zm00001d043649_T058;Zm00001d043649_T023;Zm00001d043649_T012;Zm00001d043649_T029;Zm00001d043649_T015;Zm00001d043649_T071;Zm00001d043649_T010;Zm00001d043649_T024;Zm00001d043649_T019;Zm00001d043649_T036;Zm00001d043649_T018;Zm00001d043649_T011;Zm00001d043649_T056;Zm00001d043649_T054;Zm00001d043649_T022;Zm00001d043649_T049;Zm00001d043649_T044;Zm00001d043649_T003…	GO:0004106(chorismate mutase activity);GO:0004672(protein kinase activity);GO:0004674(protein serine/threonine kinase activity);GO:0005515(protein binding);GO:0005524(ATP binding);GO:0005634(nucleus);GO:0005886(plasma membrane);GO:0006468(protein phosphorylation);GO:0008168(methyltransferase activity);GO:0009073(aromatic amino acid family biosynthetic process);GO:0046417(chorismate metabolic proc…	NA	NA	NA		protein_coding	0.549316	0.679475	0.582501	3.9192	6.35536	4.92854	0.11914	-3.06927	5.9858e-16	2.69805e-14	down	yes
Zm00001d012237	Zm00001d012237	Zm00001d012237_T001	GO:0000724(double-strand break repair via homologous recombination);GO:0003677(DNA binding)	NA	NA	NA	SnRK1-interacting protein 1	protein_coding	0.106416	0.904547	0.570233	15.7669	13.2155	10.2382	0.0403154	-4.63253	6.08786e-16	2.73825e-14	down	yes
Zm00001d004481	Zm00001d004481	Zm00001d004481_T001;Zm00001d004481_T002	NA	NA	NA	NA		protein_coding	0.455589	0.640167	0.527297	0.0001	0.0001	0.0001	5410.18	12.4015	6.25435e-16	2.8072e-14	up	yes
Zm00001d004475	Zm00001d004475	Zm00001d004475_T001	GO:0000027(ribosomal large subunit assembly);GO:0003723(RNA binding);GO:0003735(structural constituent of ribosome);GO:0005840(ribosome);GO:0006412(translation);GO:0022625(cytosolic large ribosomal subunit)	NA	NA	NA	60S ribosomal protein L11-1	protein_coding	0.0001	0.0001	0.0001	17.3831	5.59863	18.8801	7.16644e-06	-17.0903	7.63609e-16	3.42016e-14	down	yes
Zm00001d044399	Zm00001d044399	Zm00001d044399_T001	GO:0009416(response to light stimulus);GO:0009507(chloroplast);GO:0009522(photosystem I);GO:0009523(photosystem II);GO:0009535(chloroplast thylakoid membrane);GO:0009536(plastid);GO:0009579(thylakoid);GO:0009765(photosynthesis, light harvesting);GO:0009768(photosynthesis, light harvesting in photosystem I);GO:0009941(chloroplast envelope);GO:0010287(plastoglobule);GO:0015979(photosynthesis);GO:00…	00196(Photosynthesis - antenna proteins)	K08912	NA	photosystem II light harvesting complex gene B1B2	protein_coding	86.3726	62.4341	63.0767	1233.86	734.031	650.898	0.0809091	-3.62755	8.36019e-16	3.73662e-14	down	yes
Zm00001d018210	Zm00001d018210	Zm00001d018210_T001	NA	NA	NA	NA		protein_coding	0.0001	0.0001	0.0001	1.92037	1.94566	4.48351	3.59301e-05	-14.7644	8.43652e-16	3.76283e-14	down	yes
Zm00001d019914	Zm00001d019914	Zm00001d019914_T001	NA	NA	NA	NA		protein_coding	0.0001	0.0001	0.0001	1.18047	1.19531	1.52907	7.68276e-05	-13.668	8.58694e-16	3.8219e-14	down	yes
Zm00001d030222	Zm00001d030222	Zm00001d030222_T002;Zm00001d030222_T001	NA	NA	NA	NA		protein_coding	1.28245	6.3331	7.3839	0.0001	0.0001	0.0001	49998.2	15.6096	8.67273e-16	3.85203e-14	up	yes
Zm00001d043298	Zm00001d043298	Zm00001d043298_T001	GO:0005524(ATP binding);GO:0016301(kinase activity);GO:0016310(phosphorylation);GO:0016787(hydrolase activity)	NA	NA	NA	P-loop containing nucleoside triphosphate hydrolases superfamily protein	protein_coding	0.0001	0.161323	0.05184	31.1794	3.20119	9.92005	0.00481399	-7.69855	8.93043e-16	3.95823e-14	down	yes
Zm00001d005599	Zm00001d005599	Zm00001d005599_T001	GO:0008270(zinc ion binding);GO:0016020(membrane);GO:0016021(integral component of membrane);GO:0046872(metal ion binding)	NA	NA	NA	RING/U-box superfamily protein	protein_coding	0.0001	0.0001	0.0001	2.02195	0.960504	1.07879	7.3869e-05	-13.7247	9.99243e-16	4.41973e-14	down	yes
Zm00001d012081	Zm00001d012081	Zm00001d012081_T001	GO:0005504(fatty acid binding);GO:0006508(proteolysis);GO:0008233(peptidase activity);GO:0009627(systemic acquired resistance)	NA	NA	NA	PVR3-like protein%3B Protease inhibitor/seed storage/LTP family protein	protein_coding	4.45667	12.2782	11.2035	0.0001	0.0001	0.0001	93128.2	16.5069	1.00865e-15	4.45209e-14	up	yes
Zm00001d001924	Zm00001d001924	Zm00001d001924_T001	GO:0016491(oxidoreductase activity);GO:0046872(metal ion binding);GO:0051213(dioxygenase activity);GO:0055114(oxidation-reduction process);GO:0071456(cellular response to hypoxia);GO:0080167(response to karrikin)	NA	NA	NA	KAR-UP oxidoreductase 1	protein_coding	0.446451	0.911605	0.819212	8.21187	5.22775	5.36581	0.115779	-3.11056	1.04316e-15	4.59486e-14	down	yes
Zm00001d001747	Zm00001d001747	Zm00001d001747_T001	NA	NA	NA	NA		lincRNA	0.0001	0.0001	0.0001	2.70393	4.18132	2.53068	3.18609e-05	-14.9379	1.08438e-15	4.76656e-14	down	yes
Zm00001d005742	Zm00001d005742	Zm00001d005742_T002;Zm00001d005742_T001	GO:0016020(membrane);GO:0016021(integral component of membrane);GO:0016021(integral component of membrane)	NA	NA	NA		protein_coding	6.31034	10.5037	21.1582	0.265534	0.0001	0.150418	91.268	6.51204	1.15003e-15	5.04473e-14	up	yes
Zm00001d039786	Zm00001d039786	Zm00001d039786_T001	NA	NA	NA	NA		protein_coding	30.5479	101.611	133.006	5.85749	1.55244	2.0312	28.0862	4.81179	1.28568e-15	5.62816e-14	up	yes
Zm00001d035663	Zm00001d035663	Zm00001d035663_T001	NA	NA	NA	NA		protein_coding	30.5272	7.39012	16.1189	0.0001	0.0001	0.18727	288.239	8.17112	1.32459e-15	5.7752e-14	up	yes
Zm00001d042883	Zm00001d042883	Zm00001d042883_T011;Zm00001d042883_T008;Zm00001d042883_T014;Zm00001d042883_T010;Zm00001d042883_T004;Zm00001d042883_T013;Zm00001d042883_T006;Zm00001d042883_T009;Zm00001d042883_T001;Zm00001d042883_T003;Zm00001d042883_T012;Zm00001d042883_T002;Zm00001d042883_T005;Zm00001d042883_T015	GO:0005737(cytoplasm);GO:0008168(methyltransferase activity);GO:0008757(S-adenosylmethionine-dependent methyltransferase activity);GO:0016020(membrane);GO:0016021(integral component of membrane);GO:0016740(transferase activity);GO:0032259(methylation);GO:0052546(cell wall pectin metabolic process);GO:0052546(cell wall pectin metabolic process)	NA	NA	NA	Probable methyltransferase PMT10	protein_coding	0.0001	0.0001	0.0001	0.701182	0.716779	0.641984	0.000145635	-12.7454	1.3247e-15	5.7752e-14	down	yes
Zm00001d025962	Zm00001d025962	Zm00001d025962_T001	GO:0000784(nuclear chromosome, telomeric region);GO:0003684(damaged DNA binding);GO:0006303(double-strand break repair via nonhomologous end joining);GO:0031848(protection from non-homologous end joining at telomere);GO:0035312(5'-3' exodeoxyribonuclease activity);GO:0036297(interstrand cross-link repair);GO:0090305(nucleic acid phosphodiester bond hydrolysis)	NA	NA	NA		protein_coding	0.0001	0.0001	0.0001	3.08444	1.3863	2.98188	4.02543e-05	-14.6005	1.34049e-15	5.83207e-14	down	yes
Zm00001d048020	hemoglobin1	Zm00001d048020_T001;Zm00001d048020_T002	GO:0005344(oxygen carrier activity);GO:0015671(oxygen transport);GO:0019825(oxygen binding);GO:0020037(heme binding);GO:0046872(metal ion binding);GO:0046872(metal ion binding)	NA	K21894	NA	hemoglobin1	protein_coding	11.3983	27.9618	18.8879	1.29727	0.743361	0.229962	25.6532	4.68106	1.36497e-15	5.92649e-14	up	yes
Zm00001d024699	Zm00001d024699	Zm00001d024699_T001;Zm00001d024699_T002	NA	NA	NA	NA	IQ domain-containing protein IQM2	protein_coding	0.743569	0.737921	0.920098	8.72501	7.73342	13.3587	0.0805439	-3.63408	1.43631e-15	6.22354e-14	down	yes
Zm00001d052648	MADS-transcription factor 52	Zm00001d052648_T001	GO:0004843(thiol-dependent ubiquitin-specific protease activity);GO:0008237(metallopeptidase activity);GO:0008541(proteasome regulatory particle, lid subcomplex);GO:0016579(protein deubiquitination);GO:0043161(proteasome-mediated ubiquitin-dependent protein catabolic process);GO:0061578(Lys63-specific deubiquitinase activity);GO:0070536(protein K63-linked deubiquitination);GO:0070628(proteasome b…	NA	NA	NA	Putative MADS-box transcription factor family protein	protein_coding	0.0001	0.0001	0.313761	15.6159	13.3865	13.2617	0.00742854	-7.0727	1.56535e-15	6.76887e-14	down	yes
Zm00001d046261	Zm00001d046261	Zm00001d046261_T002;Zm00001d046261_T001	GO:0005576(extracellular region);GO:0006952(defense response);GO:0006952(defense response)	NA	NA	NA	Putative thaumatin domain family protein	protein_coding	24.8015	59.7132	48.2007	6.14537	5.83678	5.20566	7.72148	2.94888	1.59314e-15	6.87505e-14	up	yes
Zm00001d041222	Zm00001d041222	Zm00001d041222_T001;Zm00001d041222_T002	NA	NA	NA	NA		protein_coding	3.32608	3.20769	2.66799	0.0001	0.0001	0.0001	30672.5	14.9047	1.61241e-15	6.94412e-14	up	yes
Zm00001d015278	Zm00001d015278	Zm00001d015278_T001;Zm00001d015278_T004;Zm00001d015278_T003;Zm00001d015278_T002	GO:0005096(GTPase activator activity);GO:0016020(membrane);GO:0016021(integral component of membrane);GO:0043547(positive regulation of GTPase activity);GO:0046872(metal ion binding);GO:0046872(metal ion binding)	NA	NA	NA	ADP-ribosylation factor GTPase-activating protein AGD3	protein_coding	0.0001	0.0001	0.0001	1.13471	2.79503	1.20483	5.84275e-05	-14.063	1.61755e-15	6.95219e-14	down	yes
Zm00001d024454	Zm00001d024454	Zm00001d024454_T001	NA	NA	NA	NA	Plant elicitor peptide 4 [Source:UniProtKB/TrEMBL;Acc:K7TLF3]	protein_coding	0.0001	0.121044	0.0001	7.12513	7.0842	6.14913	0.00595546	-7.39157	1.87038e-15	8.02266e-14	down	yes
Zm00001d034326	Zm00001d034326	Zm00001d034326_T001	GO:0003779(actin binding);GO:0005737(cytoplasm);GO:0015629(actin cytoskeleton);GO:0030042(actin filament depolymerization);GO:0051015(actin filament binding)	NA	NA	NA	Actin-depolymerizing factor 6	protein_coding	2.3517	4.57725	3.55015	0.0001	0.0001	0.0001	34930.3	15.0922	1.93124e-15	8.26704e-14	up	yes
Zm00001d049792	Zm00001d049792	Zm00001d049792_T001	GO:0016020(membrane);GO:0016021(integral component of membrane)	NA	NA	NA		protein_coding	0.0001	0.0001	0.0001	3.47492	3.12556	4.40538	2.72582e-05	-15.1629	2.04888e-15	8.75301e-14	down	yes
Zm00001d000849	Zm00001d000849	Zm00001d000849_T001	NA	NA	NA	NA		lincRNA	12.831	15.9963	11.9714	0.300961	0.0001	0.0001	135.472	7.08185	2.10214e-15	8.96252e-14	up	yes
Zm00001d015219	Zm00001d015219	Zm00001d015219_T001	NA	NA	NA	NA		protein_coding	6.87344	6.30103	7.45948	0.197917	0.0001	0.025952	92.1286	6.52558	2.17187e-15	9.24129e-14	up	yes
Zm00001d045558	Zm00001d045558	Zm00001d045558_T003;Zm00001d045558_T004;Zm00001d045558_T001;Zm00001d045558_T002	GO:0003824(catalytic activity);GO:0009116(nucleoside metabolic process);GO:0009116(nucleoside metabolic process)	NA	NA	NA	Phosphorylase superfamily protein	protein_coding	21.8242	34.7223	18.385	1.71908	3.55306	2.59762	9.52145	3.25118	2.20416e-15	9.35999e-14	up	yes
Zm00001d052902	Zm00001d052902	Zm00001d052902_T001;Zm00001d052902_T002;Zm00001d052902_T003	GO:0016020(membrane);GO:0017004(cytochrome complex assembly);GO:0055114(oxidation-reduction process);GO:0055114(oxidation-reduction process)	NA	NA	NA	Chaperone protein dnaJ 6	protein_coding	0.0001	0.0001	0.0001	1.67547	1.21743	1.95511	6.18809e-05	-13.9801	2.20937e-15	9.36341e-14	down	yes
Zm00001d043102	Zm00001d043102	Zm00001d043102_T002;Zm00001d043102_T003;Zm00001d043102_T001	GO:0005515(protein binding);GO:0017022(myosin binding);GO:0017022(myosin binding)	NA	NA	NA	F-box domain containing protein	protein_coding	0.075209	0.0537	0.0001	3.35454	3.6411	4.00697	0.0117253	-6.41423	2.32891e-15	9.85041e-14	down	yes
Zm00001d013045	Zm00001d013045	Zm00001d013045_T001	GO:0005739(mitochondrion);GO:0005743(mitochondrial inner membrane);GO:0006850(mitochondrial pyruvate transmembrane transport);GO:0031305(integral component of mitochondrial inner membrane);GO:0050833(pyruvate transmembrane transporter activity)	NA	K22138	NA	Brain protein 44-like protein	protein_coding	0.0001	0.0001	0.0001	4.12512	2.50917	2.66752	3.22517e-05	-14.9203	2.409e-15	1.01689e-13	down	yes
Zm00001d049112	Zm00001d049112	Zm00001d049112_T001;Zm00001d049112_T002	GO:0003723(RNA binding);GO:0003735(structural constituent of ribosome);GO:0005840(ribosome);GO:0006412(translation);GO:0016020(membrane);GO:0016021(integral component of membrane);GO:0022627(cytosolic small ribosomal subunit);GO:0022627(cytosolic small ribosomal subunit)	NA	NA	NA		protein_coding	0.0001	0.256163	0.06226	6.26459	7.69003	9.48177	0.013591	-6.20121	2.50983e-15	1.05736e-13	down	yes
Zm00001d013342	FHA-transcription factor 12	Zm00001d013342_T001	GO:0005515(protein binding)	NA	NA	NA	Kinetoplast-associated protein	protein_coding	0.0001	0.0001	0.0001	1.15215	1.87319	1.54837	6.55922e-05	-13.8961	2.59829e-15	1.09246e-13	down	yes
Zm00001d026523	Zm00001d026523	Zm00001d026523_T001;Zm00001d026523_T002	GO:0003735(structural constituent of ribosome);GO:0005840(ribosome);GO:0006412(translation);GO:0009507(chloroplast);GO:0009522(photosystem I);GO:0009523(photosystem II);GO:0009535(chloroplast thylakoid membrane);GO:0009536(plastid);GO:0009579(thylakoid);GO:0009765(photosynthesis, light harvesting);GO:0015979(photosynthesis);GO:0016020(membrane);GO:0016021(integral component of membrane);GO:001616…	NA	NA	NA		protein_coding	1.77489	1.7834	1.9602	0.0001	0.0001	0.0001	18395	14.167	2.63975e-15	1.10771e-13	up	yes
Zm00001d019057	asg34a(msd)	Zm00001d019057_T001	NA	NA	NA	NA		protein_coding	114.608	161.816	152.553	15.5476	12.7656	21.98	8.52953	3.09247	2.74824e-15	1.14984e-13	up	yes
Zm00001d006876	Zm00001d006876	Zm00001d006876_T002;Zm00001d006876_T003;Zm00001d006876_T001	NA	NA	NA	NA		protein_coding	0.0001	0.0001	0.0001	1.93036	1.59432	1.79998	5.63415e-05	-14.1154	2.75097e-15	1.14984e-13	down	yes
Zm00001d037983	Zm00001d037983	Zm00001d037983_T001	NA	NA	NA	NA	Phosphatidylinositol/phosphatidylcholine transfer protein SFH13	protein_coding	0.0001	0.0001	0.0001	1.26853	1.92721	1.87101	5.92096e-05	-14.0438	2.8043e-15	1.16983e-13	down	yes
Zm00001d052832	Zm00001d052832	Zm00001d052832_T001	GO:0004672(protein kinase activity);GO:0016301(kinase activity);GO:0016310(phosphorylation)	NA	NA	NA	Cysteine-rich receptor-like protein kinase 10	protein_coding	7.05112	3.6817	3.83863	0.0001	0.0001	0.0001	48571.5	15.5678	2.97486e-15	1.23856e-13	up	yes
Zm00001d046380	Zm00001d046380	Zm00001d046380_T001	NA	NA	NA	NA		protein_coding	0.030033	0.0001	0.01187	1.62431	1.99979	2.10963	0.00732559	-7.09284	3.05688e-15	1.27022e-13	down	yes
Zm00001d050220	Zm00001d050220	Zm00001d050220_T002;Zm00001d050220_T001	GO:0003824(catalytic activity);GO:0004758(serine C-palmitoyltransferase activity);GO:0005783(endoplasmic reticulum);GO:0009058(biosynthetic process);GO:0030170(pyridoxal phosphate binding);GO:0046512(sphingosine biosynthetic process);GO:0046513(ceramide biosynthetic process);GO:0046513(ceramide biosynthetic process)	NA	NA	NA	Long chain base biosynthesis protein 1	protein_coding	0.0001	0.0001	0.097878	4.36427	4.97517	3.96864	0.00736981	-7.08416	3.06377e-15	1.2706e-13	down	yes
Zm00001d021751	Zm00001d021751	Zm00001d021751_T001	GO:0000122(negative regulation of transcription by RNA polymerase II);GO:0000978(RNA polymerase II cis-regulatory region sequence-specific DNA binding);GO:0001078(GO_0001078);GO:0003677(DNA binding);GO:0005634(nucleus);GO:0006355(regulation of transcription, DNA-templated)	NA	NA	NA	GC-rich sequence DNA-binding factor-like protein	protein_coding	0.0001	0.0001	0.0001	1.39183	1.70671	1.54561	6.45974e-05	-13.9182	3.42048e-15	1.41577e-13	down	yes
Zm00001d003317	Zm00001d003317	Zm00001d003317_T001	GO:0004672(protein kinase activity);GO:0005886(plasma membrane);GO:0009506(plasmodesma);GO:0046777(protein autophosphorylation)	NA	NA	NA	Leucine-rich repeat (LRR) family protein	protein_coding	22.4161	9.29449	9.32568	0.42494	0.191258	0.581349	34.267	5.09875	3.51723e-15	1.45299e-13	up	yes
Zm00001d008649	Zm00001d008649	Zm00001d008649_T004;Zm00001d008649_T002;Zm00001d008649_T003;Zm00001d008649_T001	GO:0016567(protein ubiquitination);GO:0061630(ubiquitin protein ligase activity);GO:0061630(ubiquitin protein ligase activity)	NA	K19041	EC:2.3.2.27	RING/U-box superfamily protein	protein_coding	1.8713	3.03219	2.76927	0.339076	0.336955	0.218115	8.5811	3.10116	3.94038e-15	1.62464e-13	up	yes
Zm00001d042317	Zm00001d042317	Zm00001d042317_T001	NA	NA	NA	NA		protein_coding	0.974037	1.2203	1.22402	12.3576	77.3792	74.5165	0.0208115	-5.58648	4.07706e-15	1.67775e-13	down	yes
Zm00001d046662	Zm00001d046662	Zm00001d046662_T001	GO:0005524(ATP binding);GO:0016020(membrane);GO:0016021(integral component of membrane);GO:0016887(ATPase activity);GO:0042626(ATPase-coupled transmembrane transporter activity);GO:0055085(transmembrane transport)	NA	NA	NA	Cullin-associated NEDD8-dissociated protein 1	protein_coding	0.0001	0.0001	0.0001	0.988199	2.96033	2.46531	4.67738e-05	-14.3839	4.23745e-15	1.74038e-13	down	yes
Zm00001d034075	Zm00001d034075	Zm00001d034075_T001	GO:0016702(oxidoreductase activity, acting on single donors with incorporation of molecular oxygen, incorporation of two atoms of oxygen);GO:0046872(metal ion binding);GO:0055114(oxidation-reduction process)	NA	NA	NA		protein_coding	0.253465	0.261107	0.0001	12.7877	9.09904	12.8525	0.0148153	-6.07677	4.36975e-15	1.79126e-13	down	yes
Zm00001d007729	Zm00001d007729	Zm00001d007729_T001	GO:0005789(endoplasmic reticulum membrane);GO:0006696(ergosterol biosynthetic process);GO:0016020(membrane);GO:0016021(integral component of membrane);GO:0030674(protein-macromolecule adaptor activity)	NA	NA	NA	Erg28 like protein	protein_coding	1.84111	9.24091	3.8747	0.0001	0.0001	0.0001	49855.7	15.6055	4.42188e-15	1.80914e-13	up	yes
Zm00001d012032	Zm00001d012032	Zm00001d012032_T064;Zm00001d012032_T028;Zm00001d012032_T061;Zm00001d012032_T041;Zm00001d012032_T048;Zm00001d012032_T026;Zm00001d012032_T029;Zm00001d012032_T016;Zm00001d012032_T049;Zm00001d012032_T056;Zm00001d012032_T032;Zm00001d012032_T025;Zm00001d012032_T027;Zm00001d012032_T035;Zm00001d012032_T012;Zm00001d012032_T054;Zm00001d012032_T059;Zm00001d012032_T060;Zm00001d012032_T033;Zm00001d012032_T042…	GO:0005789(endoplasmic reticulum membrane);GO:0016020(membrane);GO:0016021(integral component of membrane);GO:0019904(protein domain specific binding);GO:0019904(protein domain specific binding)	NA	NA	NA	Transcription factor TFIIE alpha subunit	protein_coding	3.47427	3.78442	3.34995	0.520199	0.604475	0.431777	6.81591	2.76891	4.55878e-15	1.8614e-13	up	yes
Zm00001d046181	Zm00001d046181	Zm00001d046181_T001	NA	NA	NA	NA		protein_coding	1.71874	3.70744	2.48838	0.0001	0.0001	0.0001	26381.9	14.6873	4.56709e-15	1.8614e-13	up	yes
Zm00001d050909	Zm00001d050909	Zm00001d050909_T001	NA	NA	NA	NA		protein_coding	0.0001	0.0001	0.0001	4.7993	4.28475	3.79608	2.32917e-05	-15.3898	4.59236e-15	1.86811e-13	down	yes
Zm00001d040773	Zm00001d040773	Zm00001d040773_T001	GO:0016020(membrane);GO:0016021(integral component of membrane)	NA	NA	NA	Expressed protein; protein	protein_coding	2.51609	7.31993	6.89675	0.0001	0.0001	0.0001	55775.9	15.7674	4.81938e-15	1.95673e-13	up	yes
Zm00001d007605	Zm00001d007605	Zm00001d007605_T020;Zm00001d007605_T019;Zm00001d007605_T026;Zm00001d007605_T013;Zm00001d007605_T002;Zm00001d007605_T015;Zm00001d007605_T012;Zm00001d007605_T007;Zm00001d007605_T029;Zm00001d007605_T010;Zm00001d007605_T008;Zm00001d007605_T005;Zm00001d007605_T001;Zm00001d007605_T027;Zm00001d007605_T023;Zm00001d007605_T018;Zm00001d007605_T014;Zm00001d007605_T009;Zm00001d007605_T011;Zm00001d007605_T006…	NA	NA	NA	NA		protein_coding	0.0001	0.0001	0.0001	0.322632	0.421218	0.308365	0.000285113	-11.7762	4.85031e-15	1.96553e-13	down	yes
Zm00001d049259	Zm00001d049259	Zm00001d049259_T001	GO:0003824(catalytic activity);GO:0004758(serine C-palmitoyltransferase activity);GO:0005737(cytoplasm);GO:0009058(biosynthetic process);GO:0016740(transferase activity);GO:0017059(serine C-palmitoyltransferase complex);GO:0030170(pyridoxal phosphate binding);GO:0046512(sphingosine biosynthetic process);GO:0046513(ceramide biosynthetic process)	00600(Sphingolipid metabolism)	K00654	EC:2.3.1.50	Long chain base biosynthesis protein 2a	protein_coding	0.947778	1.75312	0.848965	0.0001	0.0001	0.0001	11832.9	13.5305	5.05008e-15	2.04259e-13	up	yes
Zm00001d048783	Zm00001d048783	Zm00001d048783_T010;Zm00001d048783_T006;Zm00001d048783_T005;Zm00001d048783_T009;Zm00001d048783_T004;Zm00001d048783_T003;Zm00001d048783_T001;Zm00001d048783_T002;Zm00001d048783_T008;Zm00001d048783_T007	GO:0004553(hydrolase activity, hydrolyzing O-glycosyl compounds);GO:0004565(beta-galactosidase activity);GO:0005618(cell wall);GO:0005773(vacuole);GO:0005975(carbohydrate metabolic process);GO:0008152(metabolic process);GO:0016020(membrane);GO:0016021(integral component of membrane);GO:0016787(hydrolase activity);GO:0016798(hydrolase activity, acting on glycosyl bonds);GO:0016798(hydrolase activi…	NA	NA	NA	Beta-galactosidase 5	protein_coding	0.0478642	0.301453	0.0611693	2.93682	3.29507	4.13804	0.0395843	-4.65893	5.42206e-15	2.18889e-13	down	yes
Zm00001d025407	Zm00001d025407	Zm00001d025407_T001	GO:0000338(protein deneddylation);GO:0005737(cytoplasm);GO:0008180(COP9 signalosome);GO:0010387(COP9 signalosome assembly)	NA	K12181	NA	COP9 signalosome complex subunit 8	protein_coding	1.46777	4.35091	2.15575	0.0001	0.0001	0.0001	26581.4	14.6981	5.53974e-15	2.23216e-13	up	yes
Zm00001d021916	Zm00001d021916	Zm00001d021916_T001;Zm00001d021916_T002	GO:0016301(kinase activity);GO:0016310(phosphorylation);GO:0016310(phosphorylation)	NA	NA	NA	Big map kinase/bmk	protein_coding	1.59671	3.45695	2.6872	0.0001	0.0001	0.0001	25802.9	14.6552	5.55227e-15	2.23298e-13	up	yes
Zm00001d025401	abscisic acid stress ripening5	Zm00001d025401_T001	NA	NA	NA	NA	abscisic acid stress ripening5	protein_coding	7.6468	10.4003	11.071	0.291685	0.0001	0.080982	78.1134	6.2875	5.76044e-15	2.31233e-13	up	yes
Zm00001d019560	beta expansin4	Zm00001d019560_T001	GO:0005576(extracellular region);GO:0019953(sexual reproduction)	NA	NA	NA	beta expansin4	protein_coding	19.2665	14.4211	11.785	0.437119	1.42863	0.462112	19.5341	4.28792	6.13138e-15	2.45659e-13	up	yes
Zm00001d039231	Zm00001d039231	Zm00001d039231_T001;Zm00001d039231_T002;Zm00001d039231_T004;Zm00001d039231_T003;Zm00001d039231_T005	GO:0000139(Golgi membrane);GO:0004672(protein kinase activity);GO:0004675(transmembrane receptor protein serine/threonine kinase activity);GO:0005524(ATP binding);GO:0005794(Golgi apparatus);GO:0005886(plasma membrane);GO:0006468(protein phosphorylation);GO:0007178(transmembrane receptor protein serine/threonine kinase signaling pathway);GO:0015018(galactosylgalactosylxylosylprotein 3-beta-glucur…	NA	NA	NA	Probable beta-14-xylosyltransferase IRX14	protein_coding	0.0001	0.0001	0.0001	0.69199	0.798557	0.732612	0.000134943	-12.8554	6.14488e-15	2.45738e-13	down	yes
Zm00001d035125	Zm00001d035125	Zm00001d035125_T001;Zm00001d035125_T002	GO:0005515(protein binding);GO:0016020(membrane);GO:0016021(integral component of membrane);GO:0043531(ADP binding);GO:0043531(ADP binding)	NA	NA	NA	Disease resistance RPP13-like protein 4	protein_coding	0.320383	0.909601	0.616425	0.0001	0.0001	0.0001	6154.7	12.5875	6.36713e-15	2.54148e-13	up	yes
Zm00001d051116	Zm00001d051116	Zm00001d051116_T001	GO:0001522(pseudouridine synthesis);GO:0019013(viral nucleocapsid);GO:0030515(snoRNA binding);GO:0031118(rRNA pseudouridine synthesis);GO:0031120(snRNA pseudouridine synthesis);GO:0031429(box H/ACA snoRNP complex);GO:0034513(box H/ACA snoRNA binding);GO:0042254(ribosome biogenesis);GO:0070034(telomerase RNA binding);GO:0090661(box H/ACA telomerase RNP complex)	NA	NA	NA	H/ACA ribonucleoprotein complex subunit 3-like protein	protein_coding	2.35311	6.07859	3.2353	0.0001	0.0001	0.0001	38890	15.2471	6.38137e-15	2.54239e-13	up	yes
Zm00001d012289	Zm00001d012289	Zm00001d012289_T001	NA	NA	NA	NA	Transposon protein Mutator sub-class	protein_coding	1.20866	2.56802	3.0814	19.4459	14.8423	17.1769	0.133257	-2.90772	6.82724e-15	2.71494e-13	down	yes
Zm00001d015653	Zm00001d015653	Zm00001d015653_T001	NA	NA	NA	NA	Trypsin family protein	protein_coding	0.0001	0.0001	0.0001	3.19904	1.43032	2.35283	4.29664e-05	-14.5064	7.01293e-15	2.78358e-13	down	yes
Zm00001d015398	Zm00001d015398	Zm00001d015398_T001	GO:0000413(protein peptidyl-prolyl isomerization);GO:0003755(peptidyl-prolyl cis-trans isomerase activity);GO:0005737(cytoplasm);GO:0005768(endosome);GO:0005802(trans-Golgi network);GO:0006457(protein folding);GO:0009507(chloroplast);GO:0016018(cyclosporin A binding);GO:0043231(intracellular membrane-bounded organelle);GO:0051082(unfolded protein binding)	NA	NA	NA		protein_coding	0.0001	0.0001	0.0001	3.43257	3.01284	3.32269	3.07122e-05	-14.9908	7.09906e-15	2.81252e-13	down	yes
Zm00001d007395	Zm00001d007395	Zm00001d007395_T001	GO:0005737(cytoplasm);GO:0016881(acid-amino acid ligase activity)	NA	NA	NA	Indole-3-acetic acid-amido synthetase GH3.17	protein_coding	0.18805	0.082018	0.0001	7.86756	6.4764	12.6815	0.00999678	-6.64432	7.15157e-15	2.82806e-13	down	yes
Zm00001d037778	Zm00001d037778	Zm00001d037778_T001;Zm00001d037778_T002	GO:0004343(glucosamine 6-phosphate N-acetyltransferase activity);GO:0005783(endoplasmic reticulum);GO:0005793(endoplasmic reticulum-Golgi intermediate compartment);GO:0005794(Golgi apparatus);GO:0006048(UDP-N-acetylglucosamine biosynthetic process);GO:0008080(N-acetyltransferase activity);GO:0016740(transferase activity);GO:0016746(transferase activity, transferring acyl groups);GO:0048029(monosa…	NA	NA	NA	Acyl-CoA N-acyltransferases (NAT) superfamily protein	protein_coding	10.4022	13.4136	14.3863	70.7682	93.2663	103.414	0.142838	-2.80754	7.68155e-15	3.032e-13	down	yes
Zm00001d035018	Zm00001d035018	Zm00001d035018_T001	GO:0008168(methyltransferase activity);GO:0016740(transferase activity);GO:0032259(methylation)	NA	NA	NA	S-adenosyl-L-methionine-dependent methyltransferases superfamily protein	protein_coding	1.52482	1.61181	1.3746	0.0001	0.0001	0.0001	15037.4	13.8763	7.91008e-15	3.11643e-13	up	yes
Zm00001d013435	Zm00001d013435	Zm00001d013435_T003;Zm00001d013435_T009;Zm00001d013435_T004;Zm00001d013435_T002;Zm00001d013435_T008;Zm00001d013435_T005;Zm00001d013435_T007;Zm00001d013435_T001	GO:0000166(nucleotide binding);GO:0004672(protein kinase activity);GO:0004674(protein serine/threonine kinase activity);GO:0005524(ATP binding);GO:0005622(intracellular);GO:0006468(protein phosphorylation);GO:0016301(kinase activity);GO:0016310(phosphorylation);GO:0016740(transferase activity);GO:0018105(peptidyl-serine phosphorylation);GO:0035556(intracellular signal transduction);GO:0035556(int…	NA	NA	NA	Serine/threonine-protein kinase AtPK1/AtPK6	protein_coding	0.0553476	0.0379867	0.0387426	1.26935	0.665733	1.04989	0.0442472	-4.49827	7.99629e-15	3.14457e-13	down	yes
Zm00001d001984	Zm00001d001984	Zm00001d001984_T001;Zm00001d001984_T002	GO:0003333(amino acid transmembrane transport);GO:0005886(plasma membrane);GO:0015171(amino acid transmembrane transporter activity);GO:0016020(membrane);GO:0016021(integral component of membrane);GO:0016021(integral component of membrane)	NA	NA	NA	Probable amino acid permease 7	protein_coding	1.57024	1.11661	1.05181	0.0001	0.0001	0.0001	12462.2	13.6053	8.75398e-15	3.43618e-13	up	yes
Zm00001d018257	Zm00001d018257	Zm00001d018257_T003;Zm00001d018257_T001;Zm00001d018257_T009;Zm00001d018257_T008;Zm00001d018257_T004;Zm00001d018257_T002;Zm00001d018257_T006;Zm00001d018257_T005	GO:0016020(membrane);GO:0016021(integral component of membrane);GO:0016021(integral component of membrane)	NA	NA	NA		protein_coding	2.46328	3.32122	3.11995	0.20735	0.0930885	0.342245	13.8551	3.79235	8.80138e-15	3.44842e-13	up	yes
Zm00001d046753	Zm00001d046753	Zm00001d046753_T001	GO:0003700(DNA-binding transcription factor activity);GO:0006352(DNA-templated transcription, initiation);GO:0006355(regulation of transcription, DNA-templated)	NA	NA	NA	Vacuolar protein sorting-associated protein 52 A	protein_coding	0.0001	0.0001	0.0001	4.1002	6.2826	4.22542	2.05364e-05	-15.5715	1.01861e-14	3.98363e-13	down	yes
Zm00001d003674	Zm00001d003674	Zm00001d003674_T001	GO:0004514(nicotinate-nucleotide diphosphorylase (carboxylating) activity);GO:0004516(nicotinate phosphoribosyltransferase activity);GO:0005829(cytosol);GO:0009435(NAD biosynthetic process);GO:0016740(transferase activity);GO:0016757(transferase activity, transferring glycosyl groups);GO:0034355(NAD salvage)	NA	NA	NA	Nicotinate phosphoribosyltransferase 2	protein_coding	1.07835	1.53153	1.06872	0.0001	0.0001	0.0001	12262	13.5819	1.0578e-14	4.12929e-13	up	yes
Zm00001d036318	Zm00001d036318	Zm00001d036318_T001	GO:0004674(protein serine/threonine kinase activity);GO:0005886(plasma membrane);GO:0016020(membrane);GO:0016021(integral component of membrane);GO:0046777(protein autophosphorylation)	NA	NA	NA	ATP binding protein	protein_coding	18.4263	18.583	17.4067	2.97784	1.56116	1.25839	9.3863	3.23056	1.07802e-14	4.20051e-13	up	yes
Zm00001d049573	Zm00001d049573	Zm00001d049573_T001	GO:0004497(monooxygenase activity);GO:0005506(iron ion binding);GO:0016020(membrane);GO:0016021(integral component of membrane);GO:0016491(oxidoreductase activity);GO:0016705(oxidoreductase activity, acting on paired donors, with incorporation or reduction of molecular oxygen);GO:0016709(oxidoreductase activity, acting on paired donors, with incorporation or reduction of molecular oxygen, NAD(P)H…	NA	NA	NA	cytochrome P450 family 87 subfamily A polypeptide 6	protein_coding	3.2991	1.24813	1.525	0.0001	0.0001	0.0001	20240.8	14.305	1.08611e-14	4.22433e-13	up	yes
Zm00001d021288	Zm00001d021288	Zm00001d021288_T001;Zm00001d021288_T002	NA	00860(Porphyrin and chlorophyll metabolism);00860(Porphyrin and chlorophyll metabolism)	K22013	EC:4.99.1.10	Senescence-inducible chloroplast stay-green protein 1	protein_coding	6.56277	5.22215	7.2508	0.516401	0.334553	0.441535	14.728	3.88049	1.12383e-14	4.36305e-13	up	yes
Zm00001d001163	Zm00001d001163	Zm00001d001163_T001	NA	NA	NA	NA		lincRNA	0.0001	0.0001	0.0001	2.73544	3.22937	3.68216	3.10978e-05	-14.9728	1.14479e-14	4.43631e-13	down	yes
Zm00001d042742	Zm00001d042742	Zm00001d042742_T001	NA	NA	NA	NA	BTB/POZ domain-containing protein	protein_coding	2.75794	0.300637	2.06659	0.0001	0.0001	0.0001	17083.9	14.0603	1.23473e-14	4.77618e-13	up	yes
Zm00001d013752	Zm00001d013752	Zm00001d013752_T001	GO:0000502(proteasome complex);GO:0003735(structural constituent of ribosome);GO:0004843(thiol-dependent ubiquitin-specific protease activity);GO:0005515(protein binding);GO:0005840(ribosome);GO:0006412(translation);GO:0008237(metallopeptidase activity);GO:0008541(proteasome regulatory particle, lid subcomplex);GO:0016579(protein deubiquitination);GO:0043161(proteasome-mediated ubiquitin-dependen…	NA	NA	NA	26S proteasome non-ATPase regulatory subunit 14 homolog	protein_coding	0.0001	0.0001	0.0001	1.24683	1.67687	1.14944	7.36531e-05	-13.7289	1.28196e-14	4.94986e-13	down	yes
Zm00001d047180	Zm00001d047180	Zm00001d047180_T001	GO:0000166(nucleotide binding);GO:0004672(protein kinase activity);GO:0004674(protein serine/threonine kinase activity);GO:0005524(ATP binding);GO:0005739(mitochondrion);GO:0005759(mitochondrial matrix);GO:0006468(protein phosphorylation);GO:0016301(kinase activity);GO:0016310(phosphorylation);GO:0016740(transferase activity);GO:0042593(glucose homeostasis);GO:1904183(negative regulation of pyruv…	NA	NA	NA	[Pyruvate dehydrogenase (acetyl-transferring)] kinase mitochondrial	protein_coding	2.53634	2.94611	3.15809	0.0001	0.0001	0.0001	28801.8	14.8139	1.29825e-14	5.00369e-13	up	yes
Zm00001d005137	Zm00001d005137	Zm00001d005137_T007;Zm00001d005137_T017;Zm00001d005137_T003;Zm00001d005137_T015;Zm00001d005137_T048;Zm00001d005137_T067;Zm00001d005137_T044;Zm00001d005137_T070;Zm00001d005137_T062;Zm00001d005137_T032;Zm00001d005137_T010;Zm00001d005137_T020;Zm00001d005137_T052;Zm00001d005137_T030;Zm00001d005137_T038;Zm00001d005137_T001;Zm00001d005137_T049;Zm00001d005137_T023;Zm00001d005137_T068;Zm00001d005137_T009…	GO:0016020(membrane);GO:0016021(integral component of membrane);GO:0016021(integral component of membrane)	NA	NA	NA	Protein ENHANCED DOWNY MILDEW 2	protein_coding	0.878156	1.77477	1.48654	0.120654	0.0840738	0.0927297	13.9162	3.79869	1.32038e-14	5.07975e-13	up	yes
Zm00001d042275	Zm00001d042275	Zm00001d042275_T001	NA	NA	NA	NA	Phosphatidylinositol transfer protein CSR1	protein_coding	79.7346	119.914	125.371	15.7565	10.1162	16.3595	7.69602	2.94411	1.35721e-14	5.21202e-13	up	yes
Zm00001d053213	Zm00001d053213	Zm00001d053213_T001	NA	NA	NA	NA	Chaperone protein dnaJ 11 chloroplastic	protein_coding	0.28763	1.39939	0.518596	14.5538	21.2642	21.7458	0.0383161	-4.70591	1.39167e-14	5.33473e-13	down	yes
Zm00001d047981	Zm00001d047981	Zm00001d047981_T001;Zm00001d047981_T002	GO:0003824(catalytic activity);GO:0004351(glutamate decarboxylase activity);GO:0005829(cytosol);GO:0006536(glutamate metabolic process);GO:0006538(glutamate catabolic process);GO:0016829(lyase activity);GO:0016831(carboxy-lyase activity);GO:0019752(carboxylic acid metabolic process);GO:0030170(pyridoxal phosphate binding);GO:0030170(pyridoxal phosphate binding)	00250(Alanine, aspartate and glutamate metabolism);00410(beta-Alanine metabolism);00430(Taurine and hypotaurine metabolism);00650(Butanoate metabolism);00650(Butanoate metabolism)	K01580	EC:4.1.1.15	Glutamate decarboxylase 1	protein_coding	1.00988	1.77517	0.763521	0.0001	0.0001	0.0001	11828.6	13.53	1.40438e-14	5.37378e-13	up	yes
Zm00001d043384	Zm00001d043384	Zm00001d043384_T001	GO:0005515(protein binding);GO:0009451(RNA modification)	NA	NA	NA	Pentatricopeptide repeat-containing protein	protein_coding	0.0001	0.0001	0.031026	1.62189	2.04701	2.51545	0.0050492	-7.62973	1.44234e-14	5.50914e-13	down	yes
Zm00001d051867	Zm00001d051867	Zm00001d051867_T001	GO:0004553(hydrolase activity, hydrolyzing O-glycosyl compounds);GO:0005576(extracellular region);GO:0005618(cell wall);GO:0005975(carbohydrate metabolic process);GO:0006073(cellular glucan metabolic process);GO:0008152(metabolic process);GO:0010411(xyloglucan metabolic process);GO:0016740(transferase activity);GO:0016762(xyloglucan:xyloglucosyl transferase activity);GO:0016787(hydrolase activity…	NA	K08235	EC:2.4.1.207	Probable xyloglucan endotransglucosylase/hydrolase protein 32	protein_coding	2.52082	1.45127	1.69904	0.0001	0.0001	0.0001	18903.7	14.2064	1.46077e-14	5.56952e-13	up	yes
Zm00001d041690	adenosine 5'-phosphosulfate reductase-like7	Zm00001d041690_T001;Zm00001d041690_T002	NA	NA	NA	NA	adenosine 5'-phosphosulfate reductase-like7	protein_coding	0.0001	0.042069	0.032464	1.83582	2.6044	2.94764	0.0101021	-6.6292	1.52058e-14	5.7872e-13	down	yes
Zm00001d002021	Zm00001d002021	Zm00001d002021_T001	GO:0016020(membrane);GO:0016021(integral component of membrane)	NA	NA	NA		protein_coding	44.8573	77.778	80.0699	12.754	8.36409	8.55284	6.83177	2.77226	1.56906e-14	5.96102e-13	up	yes
Zm00001d050598	Zm00001d050598	Zm00001d050598_T001	NA	NA	NA	NA		protein_coding	1.26946	3.22087	3.33055	0.0001	0.0001	0.0001	26069.6	14.6701	1.6021e-14	6.0757e-13	up	yes
Zm00001d037501	Zm00001d037501	Zm00001d037501_T001	GO:0004619(phosphoglycerate mutase activity);GO:0005737(cytoplasm);GO:0006007(glucose catabolic process);GO:0030145(manganese ion binding);GO:0044262(cellular carbohydrate metabolic process);GO:0046537(2,3-bisphosphoglycerate-independent phosphoglycerate mutase activity)	NA	NA	NA	23-bisphosphoglycerate-independent phosphoglycerate mutase 1	protein_coding	3.79065	11.2798	6.57512	0.0001	0.0001	0.137383	157.327	7.29762	1.60715e-14	6.08401e-13	up	yes
Zm00001d024978	Zm00001d024978	Zm00001d024978_T001	GO:0043531(ADP binding)	NA	NA	NA	Disease resistance protein RPM1	protein_coding	0.0001	0.0001	0.0001	0.646521	0.72599	0.961624	0.000128527	-12.9256	1.61191e-14	6.09118e-13	down	yes
Zm00001d038718	hemoglobin2	Zm00001d038718_T001;Zm00001d038718_T003;Zm00001d038718_T002	GO:0005344(oxygen carrier activity);GO:0015671(oxygen transport);GO:0019825(oxygen binding);GO:0020037(heme binding);GO:0046872(metal ion binding);GO:0046872(metal ion binding)	NA	K21894	NA	hemoglobin2	protein_coding	223.402	533.263	366.58	58.998	35.687	31.0875	8.93076	3.15878	1.82945e-14	6.90098e-13	up	yes
Zm00001d043826	Zm00001d043826	Zm00001d043826_T001	NA	NA	NA	NA		protein_coding	6.43938	8.67378	7.9996	0.0001	0.0001	0.0001	77042.5	16.2334	1.9748e-14	7.43607e-13	up	yes
Zm00001d028651	wusl1032	Zm00001d028651_T001	GO:0016301(kinase activity);GO:0016310(phosphorylation)	NA	NA	NA	Cysteine-rich repeat secretory protein 55	protein_coding	0.0001	0.098078	0.120786	5.54827	15.1544	3.10543	0.00919705	-6.76461	2.05118e-14	7.71003e-13	down	yes
Zm00001d048672	Zm00001d048672	Zm00001d048672_T001;Zm00001d048672_T002	GO:0000166(nucleotide binding);GO:0000724(double-strand break repair via homologous recombination);GO:0003676(nucleic acid binding);GO:0003677(DNA binding);GO:0003678(DNA helicase activity);GO:0004386(helicase activity);GO:0005524(ATP binding);GO:0005634(nucleus);GO:0005694(chromosome);GO:0005737(cytoplasm);GO:0006268(DNA unwinding involved in DNA replication);GO:0006281(DNA repair);GO:0006310(DN…	03440(Homologous recombination);03440(Homologous recombination)	K10901	EC:3.6.4.12	ATP-dependent DNA helicase Q-like 1	protein_coding	0.0001	0.0001	0.0001	1.45798	0.553772	1.1968	9.35001e-05	-13.3847	2.15251e-14	8.07665e-13	down	yes
Zm00001d050640	Zm00001d050640	Zm00001d050640_T001	NA	NA	NA	NA		protein_coding	0.0001	0.0001	0.0001	0.945891	0.811092	1.06299	0.000106384	-13.1984	2.17419e-14	8.14366e-13	down	yes
Zm00001d028368	Zm00001d028368	Zm00001d028368_T001	GO:0003993(acid phosphatase activity);GO:0008198(ferrous iron binding);GO:0008199(ferric iron binding);GO:0016311(dephosphorylation);GO:0016787(hydrolase activity);GO:0046872(metal ion binding)	00740(Riboflavin metabolism)	K14379	EC:3.1.3.2	Purple acid phosphatase 1	protein_coding	6.57314	15.5876	15.7584	0.604854	0.072033	0.597001	29.7665	4.89562	2.21638e-14	8.28709e-13	up	yes
Zm00001d022321	Zm00001d022321	Zm00001d022321_T007;Zm00001d022321_T005;Zm00001d022321_T011;Zm00001d022321_T013;Zm00001d022321_T008;Zm00001d022321_T012;Zm00001d022321_T004;Zm00001d022321_T009;Zm00001d022321_T001;Zm00001d022321_T014;Zm00001d022321_T010;Zm00001d022321_T002;Zm00001d022321_T006;Zm00001d022321_T003	GO:0005737(cytoplasm);GO:0016020(membrane);GO:0016021(integral component of membrane);GO:0031931(TORC1 complex);GO:0031932(TORC2 complex);GO:0032006(regulation of TOR signaling);GO:0070209(ASTRA complex);GO:0070209(ASTRA complex)	NA	NA	NA	ARM repeat superfamily protein	protein_coding	0.0001	0.0001	0.0001	0.66707	0.438429	1.19935	0.00013016	-12.9074	2.37812e-14	8.87623e-13	down	yes
Zm00001d001760	Zm00001d001760	Zm00001d001760_T001	NA	NA	NA	NA		lincRNA	0.0001	0.0001	0.0001	3.02611	3.17304	3.9888	2.94465e-05	-15.0515	2.43576e-14	9.07544e-13	down	yes
Zm00001d027175	Zm00001d027175	Zm00001d027175_T001	NA	NA	NA	NA		lincRNA	0.0001	0.0001	0.0001	1.18921	1.14742	1.30798	8.23134e-05	-13.5685	2.54794e-14	9.4768e-13	down	yes
Zm00001d024348	Zm00001d024348	Zm00001d024348_T001;Zm00001d024348_T002	GO:0008375(acetylglucosaminyltransferase activity);GO:0016020(membrane);GO:0016021(integral component of membrane);GO:0016740(transferase activity);GO:0016757(transferase activity, transferring glycosyl groups);GO:0016757(transferase activity, transferring glycosyl groups)	NA	NA	NA	Core-2/I-branching beta-16-N-acetylglucosaminyltransferase family protein	protein_coding	0.0001	0.0001	0.0001	1.11079	0.89172	0.983442	0.00010047	-13.2809	2.58816e-14	9.60961e-13	down	yes
Zm00001d024356	Zm00001d024356	Zm00001d024356_T002;Zm00001d024356_T001	NA	NA	NA	NA		protein_coding	0.0001	0.109159	0.0001	4.00483	4.02259	3.79304	0.00925167	-6.75607	2.78042e-14	1.03055e-12	down	yes
Zm00001d026164	Zm00001d026164	Zm00001d026164_T001;Zm00001d026164_T006;Zm00001d026164_T005;Zm00001d026164_T002;Zm00001d026164_T007;Zm00001d026164_T003;Zm00001d026164_T004	GO:0016192(vesicle-mediated transport);GO:0016192(vesicle-mediated transport)	NA	NA	NA	OSJNBa0010H02.21 protein	protein_coding	0.0001	0.0001	0.0001	0.961553	0.731469	0.408366	0.000142763	-12.7741	3.01556e-14	1.11576e-12	down	yes
Zm00001d050548	Zm00001d050548	Zm00001d050548_T001;Zm00001d050548_T002	NA	NA	NA	NA		protein_coding	0.688014	1.5049	0.780018	0.0001	0.0001	0.0001	9909.77	13.2746	3.08943e-14	1.1411e-12	up	yes
Zm00001d026113	naked endosperm2	Zm00001d026113_T012;Zm00001d026113_T013;Zm00001d026113_T009;Zm00001d026113_T004;Zm00001d026113_T002;Zm00001d026113_T007;Zm00001d026113_T016;Zm00001d026113_T017;Zm00001d026113_T005;Zm00001d026113_T010;Zm00001d026113_T014;Zm00001d026113_T001;Zm00001d026113_T018;Zm00001d026113_T008;Zm00001d026113_T006;Zm00001d026113_T011;Zm00001d026113_T015	GO:0003676(nucleic acid binding);GO:0003700(DNA-binding transcription factor activity);GO:0005634(nucleus);GO:0006355(regulation of transcription, DNA-templated);GO:0006355(regulation of transcription, DNA-templated)	NA	NA	NA	naked endosperm2	protein_coding	4.44098	5.12455	6.31411	0.710185	0.909868	0.827003	6.48928	2.69806	3.13753e-14	1.15686e-12	up	yes
Zm00001d023657	Zm00001d023657	Zm00001d023657_T001	GO:0000166(nucleotide binding);GO:0005525(GTP binding);GO:0005737(cytoplasm);GO:0005886(plasma membrane);GO:0006886(intracellular protein transport);GO:0016192(vesicle-mediated transport)	NA	NA	NA		protein_coding	10.8044	11.1017	8.13254	0.0001	0.0001	0.0001	100129	16.6115	3.17062e-14	1.16704e-12	up	yes
Zm00001d042888	Zm00001d042888	Zm00001d042888_T001;Zm00001d042888_T002;Zm00001d042888_T003	GO:0000178(exosome (RNase complex));GO:0003723(RNA binding);GO:0016020(membrane);GO:0016021(integral component of membrane);GO:0016021(integral component of membrane)	NA	NA	NA		protein_coding	1.46363	1.4997	1.24635	0.129782	0.0539468	0.0760401	16.2055	4.01841	3.35932e-14	1.23436e-12	up	yes
Zm00001d022233	Zm00001d022233	Zm00001d022233_T001	NA	NA	NA	NA		protein_coding	1.45084	4.9637	2.45811	0.0001	0.0001	0.0001	29575.5	14.8521	3.41808e-14	1.25379e-12	up	yes
Zm00001d028341	Zm00001d028341	Zm00001d028341_T003;Zm00001d028341_T001;Zm00001d028341_T002	NA	NA	NA	NA		protein_coding	0.0001	0.0001	0.0001	1.07164	0.780482	1.03651	0.000103856	-13.2331	3.43169e-14	1.25661e-12	down	yes
Zm00001d047090	Zm00001d047090	Zm00001d047090_T002;Zm00001d047090_T001	GO:0005576(extracellular region);GO:0019953(sexual reproduction);GO:0019953(sexual reproduction)	NA	NA	NA	Expansin-B4	protein_coding	57.5986	82.5441	57.7634	9.89611	11.6859	6.84997	6.96069	2.79923	3.49524e-14	1.27769e-12	up	yes
Zm00001d051847	nana2-like1	Zm00001d051847_T001	GO:0005737(cytoplasm);GO:0008202(steroid metabolic process);GO:0016020(membrane);GO:0016491(oxidoreductase activity);GO:0016628(oxidoreductase activity, acting on the CH-CH group of donors, NAD or NADP as acceptor);GO:0050660(flavin adenine dinucleotide binding);GO:0055114(oxidation-reduction process);GO:0071949(FAD binding)	NA	NA	NA	nana2-like1	protein_coding	1.8134	1.4375	1.52427	0.0001	0.0001	0.0001	15917.2	13.9583	3.52958e-14	1.28803e-12	up	yes
Zm00001d002917	Zm00001d002917	Zm00001d002917_T001	GO:0003676(nucleic acid binding);GO:0003723(RNA binding)	NA	NA	NA	RNA-binding region RNP-1	protein_coding	11.3091	15.5267	19.7632	0.0001	0.282456	0.0001	164.861	7.36511	3.7353e-14	1.36076e-12	up	yes
Zm00001d036165	Zm00001d036165	Zm00001d036165_T001	GO:0005351(carbohydrate:proton symporter activity);GO:0005887(integral component of plasma membrane);GO:0008643(carbohydrate transport);GO:0016020(membrane);GO:0016021(integral component of membrane);GO:0022857(transmembrane transporter activity);GO:0046323(glucose import);GO:0055085(transmembrane transport);GO:1902600(proton transmembrane transport)	NA	NA	NA		protein_coding	0.992406	1.48977	0.964391	0.0001	0.0001	0.0001	11488.6	13.4879	3.80768e-14	1.38476e-12	up	yes
Zm00001d006568	Zm00001d006568	Zm00001d006568_T001	NA	NA	NA	NA	Universal stress protein PHOS34	protein_coding	0.096601	0.363838	0.231535	7.46528	5.37379	12.429	0.0273853	-5.19045	3.95702e-14	1.43661e-12	down	yes
Zm00001d050145	Zm00001d050145	Zm00001d050145_T001;Zm00001d050145_T002	GO:0000288(nuclear-transcribed mRNA catabolic process, deadenylation-dependent decay);GO:0000932(P-body);GO:0006417(regulation of translation);GO:0017148(negative regulation of translation);GO:0030015(CCR4-NOT core complex);GO:0060090(molecular adaptor activity);GO:0060090(molecular adaptor activity)	NA	NA	NA	transcription regulators	protein_coding	0.0001	0.0001	0.0001	0.818528	0.769592	0.621032	0.000135799	-12.8462	4.43575e-14	1.60768e-12	down	yes
Zm00001d035371	Zm00001d035371	Zm00001d035371_T001	NA	NA	NA	NA		protein_coding	0.0001	0.0001	0.0001	3.2772	1.69819	6.96537	2.5124e-05	-15.2806	4.47478e-14	1.61834e-12	down	yes
Zm00001d040561	Zm00001d040561	Zm00001d040561_T001	NA	NA	NA	NA		protein_coding	23.9284	40.9346	28.8069	4.77814	3.69687	5.58113	6.66399	2.73639	4.4804e-14	1.61834e-12	up	yes
Zm00001d023395	Zm00001d023395	Zm00001d023395_T001	NA	NA	NA	NA	Stress-response A/B barrel domain-containing protein	protein_coding	94.8404	138.53	137.91	18.2804	5.23809	6.08485	12.5418	3.64868	4.73728e-14	1.70823e-12	up	yes
Zm00001d018765	Zm00001d018765	Zm00001d018765_T001	GO:0009535(chloroplast thylakoid membrane);GO:0016020(membrane);GO:0016021(integral component of membrane)	NA	NA	NA		protein_coding	5.89625	4.426	6.41548	0.098041	0.151722	0.0001	66.9877	6.06582	5.06722e-14	1.82411e-12	up	yes
Zm00001d024455	Zm00001d024455	Zm00001d024455_T001	GO:0009611(response to wounding);GO:0031347(regulation of defense response);GO:2000022(regulation of jasmonic acid mediated signaling pathway)	NA	NA	NA	Protein TIFY 10B	protein_coding	0.0001	0.0001	0.0001	3.48565	2.83102	4.69239	2.72503e-05	-15.1634	5.53963e-14	1.9908e-12	down	yes
Zm00001d000526	Zm00001d000526	Zm00001d000526_T001	NA	NA	NA	NA		lincRNA	22.4305	27.4628	20.7217	1.35806	0.149706	0.186129	41.6879	5.38156	5.70667e-14	2.04738e-12	up	yes
Zm00001d034099	Zm00001d034099	Zm00001d034099_T002;Zm00001d034099_T001	GO:0016491(oxidoreductase activity);GO:0055114(oxidation-reduction process);GO:0055114(oxidation-reduction process)	NA	NA	NA	Ferredoxin--NADP reductase leaf isozyme 1 chloroplastic	protein_coding	0.0001	0.0001	0.0001	1.33268	1.73548	0.677096	8.01015e-05	-13.6078	6.28448e-14	2.25088e-12	down	yes
Zm00001d037609	Zm00001d037609	Zm00001d037609_T006;Zm00001d037609_T002;Zm00001d037609_T004;Zm00001d037609_T001;Zm00001d037609_T005;Zm00001d037609_T003	GO:0016620(oxidoreductase activity, acting on the aldehyde or oxo group of donors, NAD or NADP as acceptor);GO:0055114(oxidation-reduction process);GO:0055114(oxidation-reduction process)	NA	NA	NA	GDSL esterase/lipase	protein_coding	3.09766	5.99534	4.4826	0.554474	0.352092	0.257171	11.6655	3.54418	6.47102e-14	2.3138e-12	up	yes
Zm00001d046582	Zm00001d046582	Zm00001d046582_T024;Zm00001d046582_T027;Zm00001d046582_T018;Zm00001d046582_T019;Zm00001d046582_T014;Zm00001d046582_T028;Zm00001d046582_T005;Zm00001d046582_T008;Zm00001d046582_T011;Zm00001d046582_T020;Zm00001d046582_T025;Zm00001d046582_T013;Zm00001d046582_T023;Zm00001d046582_T003;Zm00001d046582_T016;Zm00001d046582_T026;Zm00001d046582_T006;Zm00001d046582_T009;Zm00001d046582_T012;Zm00001d046582_T017…	NA	NA	NA	NA		protein_coding	0.0001	0.0001	0.0001	0.231419	0.282008	0.245641	0.000395222	-11.3051	6.55351e-14	2.33936e-12	down	yes
Zm00001d016877	Zm00001d016877	Zm00001d016877_T003;Zm00001d016877_T004;Zm00001d016877_T002;Zm00001d016877_T001	GO:0000215(tRNA 2'-phosphotransferase activity);GO:0003950(NAD+ ADP-ribosyltransferase activity);GO:0006388(tRNA splicing, via endonucleolytic cleavage and ligation);GO:0008033(tRNA processing);GO:0016740(transferase activity);GO:0016772(transferase activity, transferring phosphorus-containing groups);GO:0016772(transferase activity, transferring phosphorus-containing groups)	NA	K10669	EC:2.7.1.160	RNA 2'-phosphotransferase Tpt1 / KptA family	protein_coding	2.70473	2.92352	2.30851	14.7433	18.2265	21.0517	0.146918	-2.76691	6.69082e-14	2.38437e-12	down	yes
ENSRNA049463813	U1	ENSRNA049463813-T1	NA	NA	NA	NA	U1 spliceosomal RNA	snRNA	27.5231	20.0854	12.2951	0.0001	0.186509	0.0001	320.839	8.32571	6.91687e-14	2.46081e-12	up	yes
Zm00001d030114	Zm00001d030114	Zm00001d030114_T001;Zm00001d030114_T004;Zm00001d030114_T006;Zm00001d030114_T005;Zm00001d030114_T002;Zm00001d030114_T003	GO:0000463(maturation of LSU-rRNA from tricistronic rRNA transcript (SSU-rRNA, 5.8S rRNA, LSU-rRNA));GO:0003723(RNA binding);GO:0003735(structural constituent of ribosome);GO:0005840(ribosome);GO:0022625(cytosolic large ribosomal subunit);GO:0022625(cytosolic large ribosomal subunit)	03010(Ribosome);03010(Ribosome)	K02937	NA	60S ribosomal protein L7-2	protein_coding	0.0001	0.0001	0.0001	1.88003	3.41009	1.33683	4.52696e-05	-14.4311	7.07027e-14	2.51119e-12	down	yes
Zm00001d002216	Zm00001d002216	Zm00001d002216_T001;Zm00001d002216_T002;Zm00001d002216_T003	GO:0000166(nucleotide binding);GO:0005215(transporter activity);GO:0005515(protein binding);GO:0005524(ATP binding);GO:0016887(ATPase activity);GO:0017004(cytochrome complex assembly);GO:0022857(transmembrane transporter activity);GO:0055085(transmembrane transport);GO:0055085(transmembrane transport)	NA	NA	NA	ABC transporter I family member 1	protein_coding	0.0001	0.0001	0.0001	0.468135	0.465359	0.611852	0.000194131	-12.3307	7.11522e-14	2.52294e-12	down	yes
Zm00001d033867	Zm00001d033867	Zm00001d033867_T005;Zm00001d033867_T006;Zm00001d033867_T002;Zm00001d033867_T004;Zm00001d033867_T003;Zm00001d033867_T001	NA	NA	NA	NA		protein_coding	0.738958	1.41368	1.48797	0.0001	0.0001	0.0001	12135.3	13.5669	7.28769e-14	2.57979e-12	up	yes
Zm00001d018763	Zm00001d018763	Zm00001d018763_T001	GO:0009535(chloroplast thylakoid membrane);GO:0016020(membrane);GO:0016021(integral component of membrane)	NA	NA	NA		protein_coding	8.50593	7.54738	9.26539	0.0001	0.203358	0.0001	124.381	6.95862	7.34086e-14	2.5943e-12	up	yes
Zm00001d052183	Zm00001d052183	Zm00001d052183_T001	NA	NA	NA	NA		protein_coding	3.37695	1.71943	1.59541	0.0001	0.0001	0.0001	22306	14.4451	7.4043e-14	2.61238e-12	up	yes
Zm00001d013439	Zm00001d013439	Zm00001d013439_T014;Zm00001d013439_T005;Zm00001d013439_T008;Zm00001d013439_T010;Zm00001d013439_T003;Zm00001d013439_T001;Zm00001d013439_T015;Zm00001d013439_T004;Zm00001d013439_T012;Zm00001d013439_T007;Zm00001d013439_T009;Zm00001d013439_T002;Zm00001d013439_T006;Zm00001d013439_T013	GO:0000166(nucleotide binding);GO:0000786(nucleosome);GO:0003677(DNA binding);GO:0004672(protein kinase activity);GO:0004674(protein serine/threonine kinase activity);GO:0005524(ATP binding);GO:0005634(nucleus);GO:0006334(nucleosome assembly);GO:0006468(protein phosphorylation);GO:0016301(kinase activity);GO:0016310(phosphorylation);GO:0016740(transferase activity);GO:0018105(peptidyl-serine phos…	NA	NA	NA	Probable serine/threonine protein kinase IREH1	protein_coding	0.0940804	0.256664	0.113234	2.15186	1.81666	2.34571	0.0734813	-3.76648	8.49288e-14	2.99149e-12	down	yes
Zm00001d015504	Zm00001d015504	Zm00001d015504_T007;Zm00001d015504_T014;Zm00001d015504_T002;Zm00001d015504_T004;Zm00001d015504_T003;Zm00001d015504_T005;Zm00001d015504_T019;Zm00001d015504_T020;Zm00001d015504_T006	GO:0003824(catalytic activity);GO:0004721(phosphoprotein phosphatase activity);GO:0004722(protein serine/threonine phosphatase activity);GO:0004724(magnesium-dependent protein serine/threonine phosphatase activity);GO:0006470(protein dephosphorylation);GO:0016787(hydrolase activity);GO:0043169(cation binding);GO:0046872(metal ion binding);GO:0046872(metal ion binding)	NA	NA	NA	Protein phosphatase 2C isoform gamma	protein_coding	5.99402	17.6515	18.9624	1.6487	1.78352	1.21094	9.17648	3.19794	8.93301e-14	3.14132e-12	up	yes
Zm00001d020903	Zm00001d020903	Zm00001d020903_T001	GO:0005886(plasma membrane);GO:0009834(plant-type secondary cell wall biogenesis)	NA	NA	NA	Fasciclin-like arabinogalactan protein 7	protein_coding	16.3112	42.7675	31.4288	3.33408	4.46931	3.78495	7.81023	2.96536	9.04342e-14	3.1749e-12	up	yes
Zm00001d007401	Zm00001d007401	Zm00001d007401_T003;Zm00001d007401_T024;Zm00001d007401_T013;Zm00001d007401_T017;Zm00001d007401_T007;Zm00001d007401_T012;Zm00001d007401_T029;Zm00001d007401_T031;Zm00001d007401_T018;Zm00001d007401_T009;Zm00001d007401_T019;Zm00001d007401_T030;Zm00001d007401_T008;Zm00001d007401_T022;Zm00001d007401_T028;Zm00001d007401_T010;Zm00001d007401_T020;Zm00001d007401_T032;Zm00001d007401_T006;Zm00001d007401_T027…	GO:0005635(nuclear envelope);GO:0016020(membrane);GO:0016021(integral component of membrane);GO:0016021(integral component of membrane)	NA	NA	NA	Encodes alpha-helical IF (intermediate filament)-like protein.	protein_coding	0.0001	0.0154875	0.0060156	0.693379	0.367696	0.628495	0.0127861	-6.28928	9.13452e-14	3.2016e-12	down	yes
Zm00001d021648	Zm00001d021648	Zm00001d021648_T059;Zm00001d021648_T025;Zm00001d021648_T038;Zm00001d021648_T032;Zm00001d021648_T007;Zm00001d021648_T031;Zm00001d021648_T066;Zm00001d021648_T047;Zm00001d021648_T019;Zm00001d021648_T039;Zm00001d021648_T057;Zm00001d021648_T049;Zm00001d021648_T026;Zm00001d021648_T016;Zm00001d021648_T029;Zm00001d021648_T044;Zm00001d021648_T062;Zm00001d021648_T003;Zm00001d021648_T023;Zm00001d021648_T052…	GO:0005635(nuclear envelope);GO:0016020(membrane);GO:0016021(integral component of membrane);GO:0016787(hydrolase activity);GO:0016787(hydrolase activity)	NA	NA	NA		protein_coding	0.605364	1.35689	1.15	0.0312844	0.0397418	0.0273455	31.6377	4.98357	9.2793e-14	3.24699e-12	up	yes
Zm00001d038651	Zm00001d038651	Zm00001d038651_T004;Zm00001d038651_T003;Zm00001d038651_T001;Zm00001d038651_T002	GO:0030246(carbohydrate binding);GO:0030246(carbohydrate binding)	NA	NA	NA	Jacalin-related lectin 3	protein_coding	5.05369	12.8928	8.8457	0.751258	0.740674	0.161389	16.2051	4.01837	9.48939e-14	3.31381e-12	up	yes
Zm00001d014919	Zm00001d014919	Zm00001d014919_T001;Zm00001d014919_T002;Zm00001d014919_T003;Zm00001d014919_T004	GO:0005829(cytosol);GO:0008465(glycerate dehydrogenase activity);GO:0016491(oxidoreductase activity);GO:0016616(oxidoreductase activity, acting on the CH-OH group of donors, NAD or NADP as acceptor);GO:0016618(hydroxypyruvate reductase activity);GO:0030267(glyoxylate reductase (NADP) activity);GO:0042803(protein homodimerization activity);GO:0051287(NAD binding);GO:0055114(oxidation-reduction pro…	NA	NA	NA	Glycerate dehydrogenase HPR peroxisomal	protein_coding	18.1407	13.0882	13.1116	137.072	105.058	157.616	0.110921	-3.17239	9.50139e-14	3.31381e-12	down	yes
Zm00001d036340	photosystem II1	Zm00001d036340_T001	GO:0005515(protein binding)	NA	NA	NA	photosystem II1	protein_coding	102.276	105.134	102.212	711.234	741.448	645.245	0.147585	-2.76038	9.78531e-14	3.40724e-12	down	yes
Zm00001d001140	Zm00001d001140	Zm00001d001140_T001	NA	NA	NA	NA		lincRNA	0.0001	0.0001	0.061761	5.4293	8.38567	1.78618	0.00397157	-7.97608	1.0109e-13	3.51419e-12	down	yes
Zm00001d012031	Zm00001d012031	Zm00001d012031_T001	NA	NA	NA	NA		protein_coding	8.68419	17.6402	16.511	1.74865	0.49477	0.751834	14.3011	3.83805	1.10143e-13	3.82265e-12	up	yes
Zm00001d023027	Zm00001d023027	Zm00001d023027_T001	NA	NA	NA	NA		lincRNA	0.0001	0.0001	0.0001	3.97352	2.16987	3.15043	3.22795e-05	-14.919	1.11543e-13	3.86495e-12	down	yes
Zm00001d013393	Zm00001d013393	Zm00001d013393_T001	GO:0004438(phosphatidylinositol-3-phosphatase activity);GO:0046856(phosphatidylinositol dephosphorylation)	NA	NA	NA	Phosphatidylinositol-3-phosphatase myotubularin-1	protein_coding	0.0001	0.0001	0.0001	1.03521	1.43183	2.50605	6.03247e-05	-14.0169	1.13698e-13	3.93321e-12	down	yes
Zm00001d051109	Zm00001d051109	Zm00001d051109_T001	NA	NA	NA	NA	General transcription factor 2-related zinc finger protein	protein_coding	0.0001	0.0001	0.0001	0.98873	0.623642	1.39275	9.98295e-05	-13.2902	1.1413e-13	3.94176e-12	down	yes
Zm00001d021775	Zm00001d021775	Zm00001d021775_T001	GO:0005351(carbohydrate:proton symporter activity);GO:0005355(glucose transmembrane transporter activity);GO:0005887(integral component of plasma membrane);GO:0008645(hexose transmembrane transport);GO:0016020(membrane);GO:0016021(integral component of membrane);GO:0022857(transmembrane transporter activity);GO:0046323(glucose import);GO:0055085(transmembrane transport);GO:1902600(proton transmem…	NA	NA	NA	Sugar carrier protein C	protein_coding	8.64594	15.1476	14.7926	2.50671	1.90006	1.95501	6.0653	2.60058	1.20195e-13	4.14449e-12	up	yes
Zm00001d044065	GRAS-transcription factor 46	Zm00001d044065_T001	GO:0003700(DNA-binding transcription factor activity);GO:0005634(nucleus);GO:0006355(regulation of transcription, DNA-templated);GO:0009723(response to ethylene);GO:0009737(response to abscisic acid);GO:0009863(salicylic acid mediated signaling pathway);GO:0009867(jasmonic acid mediated signaling pathway);GO:0009938(negative regulation of gibberellic acid mediated signaling pathway);GO:0010187(ne…	04075(Plant hormone signal transduction)	K14494	NA	DELLA protein RGA	protein_coding	12.1798	28.4109	30.5511	4.00099	3.00828	2.39711	7.56315	2.91899	1.27148e-13	4.37714e-12	up	yes
Zm00001d050704	Zm00001d050704	Zm00001d050704_T003;Zm00001d050704_T004;Zm00001d050704_T005;Zm00001d050704_T002;Zm00001d050704_T001	GO:0005634(nucleus);GO:0006511(ubiquitin-dependent protein catabolic process);GO:0031625(ubiquitin protein ligase binding);GO:0043130(ubiquitin binding);GO:0043130(ubiquitin binding)	NA	NA	NA	NPL4-like protein 1	protein_coding	0.0776429	0.0001	0.0337755	2.42591	2.41183	3.63507	0.0131619	-6.24749	1.39153e-13	4.78267e-12	down	yes
Zm00001d047744	Zm00001d047744	Zm00001d047744_T001	GO:0016491(oxidoreductase activity);GO:0046872(metal ion binding);GO:0051213(dioxygenase activity);GO:0055114(oxidation-reduction process);GO:0120091(jasmonic acid hydrolase)	NA	NA	NA	jasmonate-regulated gene 21	protein_coding	0.781086	1.4078	2.15178	0.0001	0.0001	0.0001	14468.9	13.8207	1.406e-13	4.82463e-12	up	yes
Zm00001d026273	Zm00001d026273	Zm00001d026273_T003;Zm00001d026273_T001;Zm00001d026273_T002	GO:0005737(cytoplasm);GO:0005813(centrosome);GO:0005880(nuclear microtubule);GO:0007098(centrosome cycle);GO:0008017(microtubule binding);GO:0051225(spindle assembly);GO:0051225(spindle assembly)	NA	NA	NA	Putative DUF566 domain containing family protein	protein_coding	0.0001	0.0001	0.0001	1.25418	0.740835	0.835993	0.000105969	-13.2041	1.44142e-13	4.9382e-12	down	yes
Zm00001d019797	Zm00001d019797	Zm00001d019797_T001	NA	NA	NA	NA		protein_coding	0.0001	0.0001	0.0001	1.98921	2.41828	1.87704	4.77362e-05	-14.3546	1.45607e-13	4.98036e-12	down	yes
Zm00001d049228	Zm00001d049228	Zm00001d049228_T001	GO:0016020(membrane);GO:0016021(integral component of membrane);GO:0030247(polysaccharide binding)	NA	NA	NA	Putative membrane lipoprotein	protein_coding	0.0001	0.387568	0.343466	10.8746	8.37418	21.218	0.0180675	-5.79046	1.46933e-13	5.01764e-12	down	yes
Zm00001d008866	Zm00001d008866	Zm00001d008866_T001	NA	NA	NA	NA		protein_coding	9.00292	6.27487	7.13134	0.150499	0.2009	0.0001	63.753	5.99442	1.56269e-13	5.32791e-12	up	yes
Zm00001d013111	Zm00001d013111	Zm00001d013111_T001	GO:0005524(ATP binding);GO:0005829(cytosol);GO:0006457(protein folding);GO:0009408(response to heat);GO:0031072(heat shock protein binding);GO:0046872(metal ion binding);GO:0051082(unfolded protein binding)	NA	NA	NA	DnaJ protein	protein_coding	0.748836	1.50273	1.20294	7.56756	10.2082	10.215	0.123416	-3.0184	1.56735e-13	5.33525e-12	down	yes
Zm00001d017353	Zm00001d017353	Zm00001d017353_T001	NA	NA	NA	NA	Putative GEM-like protein 8	protein_coding	13.0204	24.6782	19.0488	2.5795	0.814987	0.625226	14.1173	3.81939	1.58038e-13	5.37103e-12	up	yes
Zm00001d053069	Zm00001d053069	Zm00001d053069_T001	GO:0000166(nucleotide binding);GO:0004672(protein kinase activity);GO:0004674(protein serine/threonine kinase activity);GO:0005524(ATP binding);GO:0005739(mitochondrion);GO:0005759(mitochondrial matrix);GO:0006468(protein phosphorylation);GO:0016301(kinase activity);GO:0016310(phosphorylation);GO:0016740(transferase activity);GO:0042593(glucose homeostasis);GO:1904183(negative regulation of pyruv…	NA	NA	NA	Putative hydroxymethylglutaryl-CoA synthase family protein	protein_coding	0.123341	0.0001	0.0001	6.75601	7.29044	5.01309	0.00648185	-7.26938	1.58501e-13	5.37816e-12	down	yes
Zm00001d012383	Zm00001d012383	Zm00001d012383_T003;Zm00001d012383_T001;Zm00001d012383_T002;Zm00001d012383_T004	NA	NA	NA	NA		protein_coding	0.0001	0.0001	0.0001	0.565863	0.674353	0.712324	0.000153646	-12.6681	1.61224e-13	5.46183e-12	down	yes
Zm00001d030183	Zm00001d030183	Zm00001d030183_T001	NA	NA	NA	NA		protein_coding	1.64769	1.37297	1.52608	0.0001	0.0001	0.033485	134.978	7.07658	1.66282e-13	5.62425e-12	up	yes
Zm00001d012441	Zm00001d012441	Zm00001d012441_T001	GO:0005515(protein binding);GO:0005634(nucleus);GO:0009909(regulation of flower development)	NA	NA	NA	CCT motif family protein	protein_coding	0.691595	4.93937	1.86747	0.0001	0.0001	0.0001	24994.8	14.6093	1.68855e-13	5.70222e-12	up	yes
Zm00001d049664	Zm00001d049664	Zm00001d049664_T001;Zm00001d049664_T002	GO:0004675(transmembrane receptor protein serine/threonine kinase activity);GO:0005886(plasma membrane);GO:0006468(protein phosphorylation);GO:0007178(transmembrane receptor protein serine/threonine kinase signaling pathway);GO:0007178(transmembrane receptor protein serine/threonine kinase signaling pathway)	NA	NA	NA		protein_coding	1.60123	2.64575	1.99991	0.0001	0.0001	0.0001	20823	14.3459	1.7279e-13	5.82586e-12	up	yes
Zm00001d038434	Zm00001d038434	Zm00001d038434_T001	GO:0005515(protein binding);GO:0009451(RNA modification);GO:0043231(intracellular membrane-bounded organelle)	NA	NA	NA	PPR repeat protein	protein_coding	0.0001	0.0001	0.0001	1.59321	1.7025	1.73674	5.96131e-05	-14.034	1.73894e-13	5.85378e-12	down	yes
Zm00001d046274	Zm00001d046274	Zm00001d046274_T004;Zm00001d046274_T005;Zm00001d046274_T003;Zm00001d046274_T001;Zm00001d046274_T002	NA	NA	NA	NA		protein_coding	0.627054	2.86533	1.45112	0.0001	0.0001	0.0001	16478.4	14.0083	1.75539e-13	5.89984e-12	up	yes
Zm00001d040497	Zm00001d040497	Zm00001d040497_T001	GO:0003824(catalytic activity);GO:0009058(biosynthetic process);GO:0016740(transferase activity);GO:0016746(transferase activity, transferring acyl groups);GO:0016747(transferase activity, transferring acyl groups other than amino-acyl groups)	NA	NA	NA	Type III polyketide synthase B	protein_coding	3.59047	1.34343	1.41785	0.0001	0.0001	0.0001	21172.5	14.3699	1.8578e-13	6.23418e-12	up	yes
Zm00001d054093	Zm00001d054093	Zm00001d054093_T004;Zm00001d054093_T006;Zm00001d054093_T005;Zm00001d054093_T002;Zm00001d054093_T003	NA	NA	NA	NA	Senescence-associated protein DIN1	protein_coding	17.0876	17.4727	14.3169	101.99	120.796	110.447	0.146676	-2.7693	1.95877e-13	6.56267e-12	down	yes
Zm00001d034042	Zm00001d034042	Zm00001d034042_T001;Zm00001d034042_T002	GO:0016020(membrane);GO:0016021(integral component of membrane);GO:0016021(integral component of membrane)	NA	NA	NA		protein_coding	0.0001	0.0001	0.0001	2.95335	2.15457	2.13033	4.14465e-05	-14.5584	2.04452e-13	6.83918e-12	down	yes
Zm00001d035444	Zm00001d035444	Zm00001d035444_T001;Zm00001d035444_T002;Zm00001d035444_T004;Zm00001d035444_T003;Zm00001d035444_T005	GO:0003824(catalytic activity);GO:0004722(protein serine/threonine phosphatase activity);GO:0006470(protein dephosphorylation);GO:0016020(membrane);GO:0016021(integral component of membrane);GO:0016021(integral component of membrane)	NA	NA	NA		protein_coding	0.0001	0.0001	0.0001	0.835172	0.589992	0.688339	0.000141944	-12.7824	2.05803e-13	6.87356e-12	down	yes
Zm00001d036175	Zm00001d036175	Zm00001d036175_T001	GO:0016788(hydrolase activity, acting on ester bonds);GO:0048046(apoplast)	NA	NA	NA	GDSL esterase/lipase APG	protein_coding	7.8121	16.2396	16.6614	1.12633	0.933414	1.9971	10.0357	3.32706	2.12445e-13	7.08426e-12	up	yes
Zm00001d006768	Zm00001d006768	Zm00001d006768_T001	GO:0003676(nucleic acid binding)	NA	NA	NA	C2H2-like zinc finger protein	protein_coding	0.197415	0.695855	0.691331	13.0462	5.54537	8.63215	0.0582066	-4.10267	2.14239e-13	7.13292e-12	down	yes
Zm00001d027718	Zm00001d027718	Zm00001d027718_T001;Zm00001d027718_T002	GO:0005576(extracellular region);GO:0005618(cell wall);GO:0009664(plant-type cell wall organization);GO:0016020(membrane);GO:0071555(cell wall organization);GO:0071555(cell wall organization)	NA	NA	NA	Expansin-A11	protein_coding	1.65496	1.43787	2.1508	0.0001	0.0001	0.0001	17478.8	14.0933	2.36129e-13	7.84944e-12	up	yes
Zm00001d039022	Zm00001d039022	Zm00001d039022_T001;Zm00001d039022_T002	GO:0005515(protein binding);GO:0016020(membrane);GO:0016021(integral component of membrane);GO:0016021(integral component of membrane)	NA	NA	NA	F-box protein family-like protein	protein_coding	0.143624	0.189765	0.119303	2.60645	2.89974	3.33344	0.0512116	-4.28738	2.50333e-13	8.30863e-12	down	yes
Zm00001d018965	Zm00001d018965	Zm00001d018965_T001	GO:0004568(chitinase activity);GO:0005576(extracellular region);GO:0005975(carbohydrate metabolic process);GO:0008152(metabolic process);GO:0016787(hydrolase activity);GO:0016798(hydrolase activity, acting on glycosyl bonds);GO:0045493(xylan catabolic process)	NA	NA	NA	Xylanase inhibitor protein 1	protein_coding	3.55956	6.80778	6.86025	0.141747	0.132946	0.0001	62.693	5.97023	2.51189e-13	8.32407e-12	up	yes
Zm00001d025607	Zm00001d025607	Zm00001d025607_T001	GO:0000166(nucleotide binding);GO:0004365(glyceraldehyde-3-phosphate dehydrogenase (NAD+) (phosphorylating) activity);GO:0006006(glucose metabolic process);GO:0009507(chloroplast);GO:0016620(oxidoreductase activity, acting on the aldehyde or oxo group of donors, NAD or NADP as acceptor);GO:0048046(apoplast);GO:0050661(NADP binding);GO:0051287(NAD binding);GO:0055114(oxidation-reduction process)	NA	NA	NA	Glyceraldehyde-3-phosphate dehydrogenase GAPA1 chloroplastic	protein_coding	0.0001	0.0001	0.0001	1.66529	1.57126	0.96742	7.13611e-05	-13.7745	2.56078e-13	8.47288e-12	down	yes
Zm00001d021528	Zm00001d021528	Zm00001d021528_T003;Zm00001d021528_T001;Zm00001d021528_T002	GO:0005515(protein binding);GO:0005515(protein binding)	NA	NA	NA	MATH domain containing protein; Os10g0478500 protein	protein_coding	0.0001	0.0724756	0.0001	1.56946	2.92882	4.02428	0.00852745	-6.87367	2.57625e-13	8.51083e-12	down	yes
Zm00001d052657	Zm00001d052657	Zm00001d052657_T001	NA	NA	NA	NA		protein_coding	2.96792	6.75269	10.1862	49.4098	70.9804	78.6355	0.100021	-3.32162	2.58319e-13	8.52051e-12	down	yes
Zm00001d024072	Zm00001d024072	Zm00001d024072_T001	NA	NA	NA	NA	CTC-interacting domain 7	protein_coding	0.0001	0.0001	0.0001	1.89506	1.66086	1.6862	5.72288e-05	-14.0929	2.70871e-13	8.9207e-12	down	yes
Zm00001d012909	Zm00001d012909	Zm00001d012909_T002;Zm00001d012909_T001;Zm00001d012909_T006;Zm00001d012909_T007;Zm00001d012909_T004;Zm00001d012909_T005;Zm00001d012909_T003	GO:0003824(catalytic activity);GO:0016787(hydrolase activity);GO:0016787(hydrolase activity)	NA	NA	NA	soluble epoxide hydrolase	protein_coding	5.34573	7.34602	15.0218	0.670114	1.19225	0.790266	10.4476	3.3851	2.84179e-13	9.34292e-12	up	yes
Zm00001d043379	Zm00001d043379	Zm00001d043379_T001	GO:0009507(chloroplast);GO:0009570(chloroplast stroma);GO:0010275(NAD(P)H dehydrogenase complex assembly);GO:0010598(NAD(P)H dehydrogenase complex (plastoquinone))	NA	NA	NA	Protein CHLORORESPIRATORY REDUCTION 7 chloroplastic	protein_coding	3.74401	5.22336	4.05081	0.0001	0.0001	0.0001	43393.9	15.4052	2.84569e-13	9.34292e-12	up	yes
Zm00001d017434	Zm00001d017434	Zm00001d017434_T001	GO:0019904(protein domain specific binding)	NA	NA	NA	14-3-3-like protein GF14 nu	protein_coding	1.89305	2.56431	2.66165	0.0001	0.0001	0.0001	23730	14.5344	2.88203e-13	9.42293e-12	up	yes
Zm00001d026387	Zm00001d026387	Zm00001d026387_T009;Zm00001d026387_T005;Zm00001d026387_T001;Zm00001d026387_T008;Zm00001d026387_T002;Zm00001d026387_T014;Zm00001d026387_T003;Zm00001d026387_T013;Zm00001d026387_T007;Zm00001d026387_T006;Zm00001d026387_T010;Zm00001d026387_T012;Zm00001d026387_T011;Zm00001d026387_T004	GO:0003677(DNA binding);GO:0046983(protein dimerization activity);GO:0046983(protein dimerization activity)	NA	NA	NA	hAT transposon superfamily protein	protein_coding	0.274601	0.815284	0.64668	0.0001	0.0001	0.00810891	209	7.70736	2.8821e-13	9.42293e-12	up	yes
Zm00001d032371	Zm00001d032371	Zm00001d032371_T003;Zm00001d032371_T001;Zm00001d032371_T002	GO:0016020(membrane);GO:0016021(integral component of membrane);GO:0016021(integral component of membrane)	NA	NA	NA		protein_coding	0.883928	0.689414	1.80088	0.0001	0.0001	0.0001	11247.4	13.4573	2.88335e-13	9.42293e-12	up	yes
Zm00001d031158	pathogenesis related protein5	Zm00001d031158_T001	GO:0005576(extracellular region);GO:0006952(defense response)	NA	NA	NA	pathogenesis related protein5	protein_coding	0.094316	0.724709	0.377369	40.6295	7.77522	11.6148	0.0199334	-5.64867	3.01241e-13	9.82962e-12	down	yes
Zm00001d041436	Zm00001d041436	Zm00001d041436_T004;Zm00001d041436_T002;Zm00001d041436_T003;Zm00001d041436_T001;Zm00001d041436_T005	GO:0016020(membrane);GO:0016021(integral component of membrane);GO:0016021(integral component of membrane)	NA	NA	NA		protein_coding	0.0001	0.0001	0.0001	2.53564	2.4691	0.89277	5.08689e-05	-14.2629	3.02444e-13	9.85375e-12	down	yes
Zm00001d003581	Zm00001d003581	Zm00001d003581_T001	GO:0004497(monooxygenase activity);GO:0005506(iron ion binding);GO:0016020(membrane);GO:0016491(oxidoreductase activity);GO:0016705(oxidoreductase activity, acting on paired donors, with incorporation or reduction of molecular oxygen);GO:0016709(oxidoreductase activity, acting on paired donors, with incorporation or reduction of molecular oxygen, NAD(P)H as one donor, and incorporation of one ato…	NA	NA	NA	cytochrome P450 family 87 subfamily A polypeptide 6	protein_coding	0.569449	1.8959	3.25081	0.0001	0.0001	0.0001	19053.9	14.2178	3.08845e-13	1.00469e-11	up	yes
Zm00001d032291	Zm00001d032291	Zm00001d032291_T001	GO:0030001(metal ion transport);GO:0046872(metal ion binding)	NA	NA	NA	Metal ion binding protein	protein_coding	1.06089	4.26477	5.32779	0.0001	0.0001	0.0001	35511.5	15.116	3.11084e-13	1.01043e-11	up	yes
Zm00001d043540	Zm00001d043540	Zm00001d043540_T012;Zm00001d043540_T020;Zm00001d043540_T007;Zm00001d043540_T015;Zm00001d043540_T019;Zm00001d043540_T009;Zm00001d043540_T006;Zm00001d043540_T011;Zm00001d043540_T010;Zm00001d043540_T004;Zm00001d043540_T003;Zm00001d043540_T008;Zm00001d043540_T002;Zm00001d043540_T001;Zm00001d043540_T017;Zm00001d043540_T014;Zm00001d043540_T018;Zm00001d043540_T013;Zm00001d043540_T016;Zm00001d043540_T005	GO:0000166(nucleotide binding);GO:0000723(telomere maintenance);GO:0003678(DNA helicase activity);GO:0004386(helicase activity);GO:0005524(ATP binding);GO:0006281(DNA repair);GO:0006310(DNA recombination);GO:0006974(cellular response to DNA damage stimulus);GO:0016787(hydrolase activity);GO:0032508(DNA duplex unwinding);GO:0032508(DNA duplex unwinding)	NA	NA	NA		protein_coding	0.0001	0.0426697	0.0189562	1.18526	0.773674	0.982852	0.0209825	-5.57467	3.13163e-13	1.01563e-11	down	yes
Zm00001d036206	Zm00001d036206	Zm00001d036206_T008;Zm00001d036206_T005;Zm00001d036206_T002;Zm00001d036206_T007;Zm00001d036206_T004;Zm00001d036206_T003;Zm00001d036206_T001;Zm00001d036206_T006	GO:0000166(nucleotide binding);GO:0003824(catalytic activity);GO:0003872(6-phosphofructokinase activity);GO:0005524(ATP binding);GO:0005737(cytoplasm);GO:0006002(fructose 6-phosphate metabolic process);GO:0006096(glycolytic process);GO:0008152(metabolic process);GO:0016301(kinase activity);GO:0016310(phosphorylation);GO:0016740(transferase activity);GO:0046872(metal ion binding);GO:0061615(glycol…	00010(Glycolysis / Gluconeogenesis);00030(Pentose phosphate pathway);00051(Fructose and mannose metabolism);00052(Galactose metabolism);03018(RNA degradation);03018(RNA degradation)	K00850	EC:2.7.1.11	ATP-dependent 6-phosphofructokinase 3	protein_coding	9.56415	10.8782	9.35717	0.0001	0.159772	0.0001	186.28	7.54133	3.3626e-13	1.08888e-11	up	yes
Zm00001d041713	Zm00001d041713	Zm00001d041713_T001	NA	NA	NA	NA		protein_coding	0.951604	1.0756	0.855446	0.0001	0.0001	0.0001	9608.82	13.2301	3.4678e-13	1.1202e-11	up	yes
Zm00001d047445	Zm00001d047445	Zm00001d047445_T001	NA	NA	NA	NA		protein_coding	1.4217	1.74427	2.45113	0.0001	0.0001	0.0001	18723.7	14.1926	3.46986e-13	1.1202e-11	up	yes
Zm00001d027271	Zm00001d027271	Zm00001d027271_T005;Zm00001d027271_T001;Zm00001d027271_T004;Zm00001d027271_T006;Zm00001d027271_T014;Zm00001d027271_T007;Zm00001d027271_T012;Zm00001d027271_T003;Zm00001d027271_T010;Zm00001d027271_T017;Zm00001d027271_T015;Zm00001d027271_T023;Zm00001d027271_T011;Zm00001d027271_T013;Zm00001d027271_T016;Zm00001d027271_T008;Zm00001d027271_T009;Zm00001d027271_T002	GO:0003735(structural constituent of ribosome);GO:0005840(ribosome);GO:0006412(translation);GO:0008299(isoprenoid biosynthetic process);GO:0016020(membrane);GO:0016021(integral component of membrane);GO:0030604(1-deoxy-D-xylulose-5-phosphate reductoisomerase activity);GO:0046872(metal ion binding);GO:0055114(oxidation-reduction process);GO:0055114(oxidation-reduction process)	NA	NA	NA	50S ribosomal protein L35	protein_coding	0.0001	0.128496	0.0106317	3.73977	2.69062	4.26689	0.0130153	-6.26365	3.48819e-13	1.12441e-11	down	yes
Zm00001d014261	Zm00001d014261	Zm00001d014261_T065;Zm00001d014261_T021;Zm00001d014261_T038;Zm00001d014261_T046;Zm00001d014261_T004;Zm00001d014261_T054;Zm00001d014261_T053;Zm00001d014261_T058;Zm00001d014261_T055;Zm00001d014261_T025;Zm00001d014261_T042;Zm00001d014261_T017;Zm00001d014261_T001;Zm00001d014261_T007;Zm00001d014261_T030;Zm00001d014261_T033;Zm00001d014261_T063;Zm00001d014261_T005;Zm00001d014261_T023;Zm00001d014261_T032…	GO:0016020(membrane);GO:0016021(integral component of membrane);GO:0016787(hydrolase activity);GO:0016787(hydrolase activity)	NA	NA	NA		protein_coding	0.0001	0.0001	0.0001	0.189843	0.27446	0.431058	0.000335061	-11.5433	3.55697e-13	1.14485e-11	down	yes
Zm00001d013572	Zm00001d013572	Zm00001d013572_T001	GO:0004672(protein kinase activity);GO:0004674(protein serine/threonine kinase activity);GO:0005524(ATP binding);GO:0005886(plasma membrane);GO:0006468(protein phosphorylation);GO:0016020(membrane);GO:0016021(integral component of membrane);GO:0016301(kinase activity);GO:0016310(phosphorylation)	NA	NA	NA	Cysteine-rich receptor-like protein kinase 10	protein_coding	1.62718	3.08801	2.37466	0.0192	0.119879	0.091827	30.7045	4.94038	3.59878e-13	1.15656e-11	up	yes
Zm00001d051450	Zm00001d051450	Zm00001d051450_T001	GO:0005506(iron ion binding);GO:0005634(nucleus);GO:0005737(cytoplasm);GO:0006555(methionine metabolic process);GO:0008652(cellular amino acid biosynthetic process);GO:0009086(methionine biosynthetic process);GO:0010309(acireductone dioxygenase [iron(II)-requiring] activity);GO:0016491(oxidoreductase activity);GO:0019509(L-methionine salvage from methylthioadenosine);GO:0046872(metal ion binding)…	NA	NA	NA	12-dihydroxy-3-keto-5-methylthiopentene dioxygenase 4	protein_coding	2.53373	1.96653	4.61058	0.0001	0.0001	0.0001	30369.5	14.8903	3.61688e-13	1.16062e-11	up	yes
Zm00001d011479	Zm00001d011479	Zm00001d011479_T001	GO:0004725(protein tyrosine phosphatase activity);GO:0005634(nucleus);GO:0016576(histone dephosphorylation);GO:0030154(cell differentiation);GO:0035335(peptidyl-tyrosine dephosphorylation);GO:0045739(positive regulation of DNA repair);GO:0046872(metal ion binding);GO:0048856(anatomical structure development);GO:2001240(negative regulation of extrinsic apoptotic signaling pathway in absence of lig…	NA	NA	NA	EYES ABSENT homolog	protein_coding	1.62101	2.55689	2.18693	0.0001	0.0001	0.0001	21216.1	14.3729	3.729e-13	1.1948e-11	up	yes
Zm00001d009502	Zm00001d009502	Zm00001d009502_T001	NA	NA	NA	NA		protein_coding	0.0001	0.0001	0.0001	1.28363	2.36859	1.89044	5.41257e-05	-14.1733	3.75813e-13	1.20232e-11	down	yes
Zm00001d038822	Zm00001d038822	Zm00001d038822_T001	GO:0001227(DNA-binding transcription repressor activity, RNA polymerase II-specific);GO:0003682(chromatin binding);GO:0005634(nucleus);GO:0006338(chromatin remodeling);GO:0016577(histone demethylation);GO:0032452(histone demethylase activity);GO:0034647(histone demethylase activity (H3-trimethyl-K4 specific));GO:0034721(histone H3-K4 demethylation, trimethyl-H3-K4-specific);GO:0035064(methylated …	NA	NA	NA		protein_coding	1.77595	1.82658	2.02545	0.0001	0.0001	0.0001	18759.9	14.1954	3.89601e-13	1.24456e-11	up	yes
Zm00001d036047	Zm00001d036047	Zm00001d036047_T001	GO:0000911(cytokinesis by cell plate formation);GO:0005875(microtubule associated complex);GO:0009574(preprophase band)	NA	NA	NA	Probable microtubule-binding protein TANGLED	protein_coding	0.95014	3.77128	5.04106	0.0001	0.0001	0.0001	32541.6	14.99	3.98715e-13	1.27176e-11	up	yes
Zm00001d032969	bronze2	Zm00001d032969_T001	GO:0004364(glutathione transferase activity);GO:0005515(protein binding);GO:0005737(cytoplasm);GO:0006749(glutathione metabolic process);GO:0009718(anthocyanin-containing compound biosynthetic process);GO:0016740(transferase activity)	NA	NA	NA	Probable glutathione S-transferase BZ2	protein_coding	0.800216	11.5065	3.25374	0.0001	0.0001	0.0001	51868.2	15.6626	4.02408e-13	1.28162e-11	up	yes
Zm00001d035683	Zm00001d035683	Zm00001d035683_T001	GO:0004867(serine-type endopeptidase inhibitor activity);GO:0009611(response to wounding);GO:0010951(negative regulation of endopeptidase activity)	NA	NA	NA	Subtilisin-chymotrypsin inhibitor CI-1B%3B Subtilisin-chymotrypsin inhibitor CI-1B isoform 1%3B Subtilisin-chymotrypsin inhibitor CI-1B isoform 2%3B Subtilisin-chymotrypsin inhibitor CI-1B isoform 3	protein_coding	15.5141	7.39851	7.30653	0.0001	0.0001	0.0001	100730	16.6201	4.09389e-13	1.30191e-11	up	yes
Zm00001d042876	Zm00001d042876	Zm00001d042876_T001	GO:0006644(phospholipid metabolic process);GO:0008374(O-acyltransferase activity);GO:0016020(membrane);GO:0016021(integral component of membrane);GO:0016740(transferase activity);GO:0016746(transferase activity, transferring acyl groups)	NA	NA	NA	Phospholipid/glycerol acyltransferase family protein	protein_coding	0.0001	0.0001	0.0001	1.59471	1.4055	1.325	6.93609e-05	-13.8155	4.23623e-13	1.34516e-11	down	yes
Zm00001d038266	Zm00001d038266	Zm00001d038266_T010;Zm00001d038266_T012;Zm00001d038266_T007;Zm00001d038266_T003;Zm00001d038266_T004;Zm00001d038266_T006;Zm00001d038266_T008;Zm00001d038266_T005;Zm00001d038266_T001;Zm00001d038266_T013;Zm00001d038266_T011;Zm00001d038266_T002;Zm00001d038266_T009	GO:0019185(snRNA-activating protein complex);GO:0042795(snRNA transcription by RNA polymerase II);GO:0042796(snRNA transcription by RNA polymerase III);GO:0043565(sequence-specific DNA binding);GO:0043565(sequence-specific DNA binding)	NA	K15208	NA	Small nuclear RNA activating complex (SNAPc) subunit SNAP43 protein	protein_coding	0.139272	0.28404	0.127343	2.61446	2.74291	1.32276	0.0824317	-3.60066	4.27473e-13	1.35536e-11	down	yes
Zm00001d012755	Zm00001d012755	Zm00001d012755_T004;Zm00001d012755_T016;Zm00001d012755_T001;Zm00001d012755_T046;Zm00001d012755_T054;Zm00001d012755_T022;Zm00001d012755_T044;Zm00001d012755_T008;Zm00001d012755_T049;Zm00001d012755_T032;Zm00001d012755_T027;Zm00001d012755_T037;Zm00001d012755_T013;Zm00001d012755_T019;Zm00001d012755_T039;Zm00001d012755_T051;Zm00001d012755_T024;Zm00001d012755_T056;Zm00001d012755_T038;Zm00001d012755_T033…	GO:0003677(DNA binding);GO:0005515(protein binding);GO:0006368(transcription elongation from RNA polymerase II promoter);GO:0016570(histone modification);GO:0016593(Cdc73/Paf1 complex);GO:0046872(metal ion binding);GO:1990269(RNA polymerase II C-terminal domain phosphoserine binding);GO:1990269(RNA polymerase II C-terminal domain phosphoserine binding)	NA	NA	NA	Zinc finger CCCH domain-containing protein 19	protein_coding	2.31258	2.0926	2.37102	0.364479	0.414439	0.296192	6.3028	2.65599	4.40544e-13	1.39473e-11	up	yes
Zm00001d007187	Zm00001d007187	Zm00001d007187_T002;Zm00001d007187_T003;Zm00001d007187_T001	NA	NA	NA	NA	hydroxyproline-rich glycoprotein family protein	protein_coding	1.53712	4.00221	3.69627	0.0001	0.0001	0.0692213	133.037	7.05568	4.61821e-13	1.45992e-11	up	yes
Zm00001d023317	resistance to Puccinia sorghi1	Zm00001d023317_T002;Zm00001d023317_T017;Zm00001d023317_T006;Zm00001d023317_T003;Zm00001d023317_T011;Zm00001d023317_T019;Zm00001d023317_T007;Zm00001d023317_T005;Zm00001d023317_T018	GO:0043531(ADP binding);GO:0043531(ADP binding)	NA	NA	NA		protein_coding	1.58656	3.9191	3.27217	0.342592	0.29117	0.205902	10.454	3.38598	4.9753e-13	1.57047e-11	up	yes
Zm00001d047165	Zm00001d047165	Zm00001d047165_T002;Zm00001d047165_T001;Zm00001d047165_T003	NA	NA	NA	NA		protein_coding	0.0001	0.0001	0.0001	0.787788	1.05338	1.3863	9.29519e-05	-13.3932	4.99364e-13	1.57392e-11	down	yes
Zm00001d037932	Zm00001d037932	Zm00001d037932_T016;Zm00001d037932_T023;Zm00001d037932_T003;Zm00001d037932_T020;Zm00001d037932_T002;Zm00001d037932_T004;Zm00001d037932_T022;Zm00001d037932_T005;Zm00001d037932_T007;Zm00001d037932_T009;Zm00001d037932_T014;Zm00001d037932_T006;Zm00001d037932_T001;Zm00001d037932_T008	GO:0005515(protein binding);GO:0007165(signal transduction);GO:0007165(signal transduction)	NA	NA	NA	Transducin/WD40 repeat-like superfamily protein	protein_coding	5.73858	6.95805	7.02134	0.986138	1.42558	0.744491	6.24736	2.64325	5.28055e-13	1.66189e-11	up	yes
Zm00001d039833	Zm00001d039833	Zm00001d039833_T001	GO:0016740(transferase activity);GO:0016747(transferase activity, transferring acyl groups other than amino-acyl groups)	00940(Phenylpropanoid biosynthesis);00941(Flavonoid biosynthesis);00945(Stilbenoid, diarylheptanoid and gingerol biosynthesis)	K13065	EC:2.3.1.133	Spermidine hydroxycinnamoyl transferase	protein_coding	3.74938	36.9219	18.8154	0.093396	0.609188	0.089505	75.101	6.23076	5.39089e-13	1.69411e-11	up	yes
Zm00001d041333	Zm00001d041333	Zm00001d041333_T001	GO:0003677(DNA binding);GO:0005634(nucleus);GO:0042025(host cell nucleus)	NA	NA	NA	OSJNBb0058J09.3 protein	protein_coding	0.0001	0.0001	0.0001	1.55951	1.05945	1.07455	8.12236e-05	-13.5877	5.49514e-13	1.72432e-11	down	yes
Zm00001d029510	Zm00001d029510	Zm00001d029510_T001	GO:0016151(nickel cation binding);GO:0016810(hydrolase activity, acting on carbon-nitrogen (but not peptide) bonds)	NA	NA	NA	Urease	protein_coding	0.0001	0.0001	0.0001	2.90046	3.81495	2.917	3.11448e-05	-14.9706	5.54622e-13	1.73779e-11	down	yes
Zm00001d012540	Zm00001d012540	Zm00001d012540_T001;Zm00001d012540_T002	GO:0004672(protein kinase activity);GO:0004843(thiol-dependent ubiquitin-specific protease activity);GO:0005515(protein binding);GO:0005524(ATP binding);GO:0006468(protein phosphorylation);GO:0008237(metallopeptidase activity);GO:0008541(proteasome regulatory particle, lid subcomplex);GO:0016579(protein deubiquitination);GO:0043161(proteasome-mediated ubiquitin-dependent protein catabolic process…	NA	NA	NA		protein_coding	0.0001	0.0001	0.0001	1.04674	1.05014	0.752938	0.00010527	-13.2136	5.66612e-13	1.77275e-11	down	yes
Zm00001d018645	Zm00001d018645	Zm00001d018645_T001	GO:0003676(nucleic acid binding);GO:0005737(cytoplasm);GO:0006139(nucleobase-containing compound metabolic process);GO:0008408(3'-5' exonuclease activity);GO:0016740(transferase activity);GO:0090305(nucleic acid phosphodiester bond hydrolysis)	NA	NA	NA	Polynucleotidyl transferase ribonuclease H-like superfamily protein	protein_coding	0.0001	0.0001	0.0001	1.69549	3.00429	1.58453	4.77379e-05	-14.3545	5.73917e-13	1.79296e-11	down	yes
Zm00001d005989	Zm00001d005989	Zm00001d005989_T001	GO:0016020(membrane);GO:0016021(integral component of membrane)	NA	NA	NA		protein_coding	24.9432	28.5507	35.5916	0.290058	1.83644	0.700357	31.514	4.97792	5.82419e-13	1.81686e-11	up	yes
Zm00001d029087	Zm00001d029087	Zm00001d029087_T001;Zm00001d029087_T014;Zm00001d029087_T011;Zm00001d029087_T004;Zm00001d029087_T017;Zm00001d029087_T015;Zm00001d029087_T018;Zm00001d029087_T009;Zm00001d029087_T006;Zm00001d029087_T002;Zm00001d029087_T008;Zm00001d029087_T007;Zm00001d029087_T020;Zm00001d029087_T016;Zm00001d029087_T005;Zm00001d029087_T003;Zm00001d029087_T010;Zm00001d029087_T021;Zm00001d029087_T012;Zm00001d029087_T013…	GO:0005985(sucrose metabolic process);GO:0016157(sucrose synthase activity);GO:0016740(transferase activity);GO:0016757(transferase activity, transferring glycosyl groups);GO:0016757(transferase activity, transferring glycosyl groups)	00500(Starch and sucrose metabolism);00500(Starch and sucrose metabolism)	K00695	EC:2.4.1.13	Sucrose synthase 3	protein_coding	2.18432	1.99098	2.79754	0.215771	0.0437089	0.110316	18.8559	4.23694	6.02443e-13	1.87657e-11	up	yes
Zm00001d015306	Zm00001d015306	Zm00001d015306_T001	GO:0005975(carbohydrate metabolic process);GO:0016853(isomerase activity);GO:0019146(arabinose-5-phosphate isomerase activity);GO:0019294(keto-3-deoxy-D-manno-octulosonic acid biosynthetic process);GO:0097367(carbohydrate derivative binding);GO:1901135(carbohydrate derivative metabolic process)	NA	NA	NA	Probable arabinose 5-phosphate isomerase	protein_coding	1.04585	2.5195	1.34069	14.9296	11.6805	9.34212	0.13646	-2.87345	6.10098e-13	1.89764e-11	down	yes
Zm00001d012578	Zm00001d012578	Zm00001d012578_T001;Zm00001d012578_T002	GO:0003824(catalytic activity);GO:0006281(DNA repair);GO:0006284(base-excision repair);GO:0008725(DNA-3-methyladenine glycosylase activity);GO:0008725(DNA-3-methyladenine glycosylase activity)	NA	NA	NA	DNA glycosylase superfamily protein	protein_coding	4.50846	10.4352	7.51431	0.864643	0.571515	0.315406	12.8217	3.68051	6.65052e-13	2.06554e-11	up	yes
Zm00001d038606	Zm00001d038606	Zm00001d038606_T001	GO:0009507(chloroplast)	NA	NA	NA	uncharacterized protein [Source:UniProtKB/TrEMBL;Acc:B6SZF2]	protein_coding	21.8389	28.6402	35.6031	167.509	208.155	156.088	0.161884	-2.62697	6.66076e-13	2.06571e-11	down	yes
Zm00001d003505	Zm00001d003505	Zm00001d003505_T001	NA	NA	NA	NA		protein_coding	0.0001	0.0001	0.0001	4.53419	1.27133	1.69069	4.00202e-05	-14.6089	6.75854e-13	2.09298e-11	down	yes
Zm00001d015226	G2-like-transcription factor 18	Zm00001d015226_T001	GO:0003677(DNA binding);GO:0005634(nucleus)	NA	NA	NA	Myb family transcription factor PHL6	protein_coding	0.578734	0.37252	0.672314	5.13396	6.54366	7.27468	0.085666	-3.54513	7.12648e-13	2.20372e-11	down	yes
Zm00001d032521	Zm00001d032521	Zm00001d032521_T004;Zm00001d032521_T001;Zm00001d032521_T003;Zm00001d032521_T002	GO:0016020(membrane);GO:0016021(integral component of membrane);GO:0016491(oxidoreductase activity);GO:0055114(oxidation-reduction process);GO:0055114(oxidation-reduction process)	NA	NA	NA	Transmembrane ascorbate ferrireductase 1	protein_coding	0.381397	3.2757	3.02957	0.0001	0.0001	0.0001	22288.9	14.444	7.48304e-13	2.31062e-11	up	yes
Zm00001d043982	Zm00001d043982	Zm00001d043982_T019;Zm00001d043982_T017;Zm00001d043982_T015;Zm00001d043982_T063;Zm00001d043982_T049;Zm00001d043982_T032;Zm00001d043982_T030;Zm00001d043982_T062;Zm00001d043982_T040;Zm00001d043982_T065;Zm00001d043982_T070;Zm00001d043982_T071;Zm00001d043982_T036;Zm00001d043982_T010;Zm00001d043982_T013;Zm00001d043982_T037;Zm00001d043982_T047;Zm00001d043982_T003;Zm00001d043982_T051;Zm00001d043982_T033…	GO:0016020(membrane);GO:0016021(integral component of membrane);GO:0016021(integral component of membrane)	NA	K03696	NA		protein_coding	0.0001	0.0001	0.0001	0.167613	0.305694	0.396325	0.000344973	-11.5012	7.74224e-13	2.38719e-11	down	yes
Zm00001d007341	Zm00001d007341	Zm00001d007341_T001	GO:0016020(membrane);GO:0016021(integral component of membrane)	NA	NA	NA	HVA22-like protein e	protein_coding	4.06642	1.72539	2.41809	0.0001	0.0001	0.0001	27366.3	14.7401	7.75667e-13	2.38778e-11	up	yes
Zm00001d044339	aldehyde dehydrogenase3	Zm00001d044339_T003;Zm00001d044339_T001;Zm00001d044339_T006;Zm00001d044339_T002;Zm00001d044339_T005;Zm00001d044339_T004	GO:0000166(nucleotide binding);GO:0004029(aldehyde dehydrogenase (NAD+) activity);GO:0016491(oxidoreductase activity);GO:0016620(oxidoreductase activity, acting on the aldehyde or oxo group of donors, NAD or NADP as acceptor);GO:0055114(oxidation-reduction process);GO:0055114(oxidation-reduction process)	00940(Phenylpropanoid biosynthesis);00940(Phenylpropanoid biosynthesis)	K12355	EC:1.2.1.68	aldehyde dehydrogenase3	protein_coding	16.5211	25.3557	30.0623	4.04133	3.11809	1.39962	8.40504	3.07125	7.76659e-13	2.38778e-11	up	yes
Zm00001d044733	Zm00001d044733	Zm00001d044733_T002;Zm00001d044733_T003;Zm00001d044733_T001	GO:0004386(helicase activity);GO:0016020(membrane);GO:0016021(integral component of membrane);GO:0016021(integral component of membrane)	NA	NA	NA		protein_coding	0.0001	0.0001	0.0001	0.443873	0.383527	0.426223	0.000239306	-12.0289	7.90582e-13	2.42708e-11	down	yes
Zm00001d023573	Zm00001d023573	Zm00001d023573_T002;Zm00001d023573_T001	NA	NA	NA	NA	Phospholipase D alpha 3	protein_coding	0.813563	1.26334	1.60177	0.0001	0.0001	0.0001	12262.3	13.5819	8.14552e-13	2.49706e-11	up	yes
Zm00001d045520	Zm00001d045520	Zm00001d045520_T001	GO:0016020(membrane);GO:0016021(integral component of membrane)	NA	NA	NA	Succinate dehydrogenase subunit 8A mitochondrila	protein_coding	4.76269	8.93775	9.05846	0.0001	0.157789	0.0001	144.054	7.17046	8.25616e-13	2.52734e-11	up	yes
Zm00001d012297	Zm00001d012297	Zm00001d012297_T001	NA	NA	NA	NA		protein_coding	3.25017	4.18369	4.67882	0.045375	0.0001	0.101104	82.6359	6.3687	8.33768e-13	2.54862e-11	up	yes
Zm00001d010339	Zm00001d010339	Zm00001d010339_T001	NA	NA	NA	NA		protein_coding	0.0001	0.0001	0.0001	4.28149	3.39944	1.65676	3.21279e-05	-14.9258	8.57493e-13	2.61739e-11	down	yes
Zm00001d002462	Zm00001d002462	Zm00001d002462_T176;Zm00001d002462_T009;Zm00001d002462_T120;Zm00001d002462_T150;Zm00001d002462_T038;Zm00001d002462_T071;Zm00001d002462_T081;Zm00001d002462_T052;Zm00001d002462_T040;Zm00001d002462_T186;Zm00001d002462_T155;Zm00001d002462_T003;Zm00001d002462_T018;Zm00001d002462_T144;Zm00001d002462_T011;Zm00001d002462_T076;Zm00001d002462_T031;Zm00001d002462_T006;Zm00001d002462_T051;Zm00001d002462_T121…	GO:0000166(nucleotide binding);GO:0003735(structural constituent of ribosome);GO:0005524(ATP binding);GO:0005778(peroxisomal membrane);GO:0005829(cytosol);GO:0005840(ribosome);GO:0006412(translation);GO:0006625(protein targeting to peroxisome);GO:0007031(peroxisome organization);GO:0016558(protein import into peroxisome matrix);GO:0016887(ATPase activity);GO:0016887(ATPase activity)	03010(Ribosome);03010(Ribosome)	K02925	NA	Peroxisome biogenesis protein 6	protein_coding	0.271115	0.626778	0.338817	2.34248	2.19819	2.45205	0.176857	-2.49935	8.7848e-13	2.6776e-11	down	yes
Zm00001d048702	benzoxazinone synthesis3	Zm00001d048702_T002;Zm00001d048702_T001	GO:0004497(monooxygenase activity);GO:0005506(iron ion binding);GO:0016020(membrane);GO:0016021(integral component of membrane);GO:0016491(oxidoreductase activity);GO:0016705(oxidoreductase activity, acting on paired donors, with incorporation or reduction of molecular oxygen);GO:0016709(oxidoreductase activity, acting on paired donors, with incorporation or reduction of molecular oxygen, NAD(P)H…	NA	NA	NA	benzoxazinone synthesis3	protein_coding	36.8355	248.57	205.637	13.0368	8.28207	5.20326	18.5145	4.21058	9.75315e-13	2.9685e-11	up	yes
Zm00001d049793	Zm00001d049793	Zm00001d049793_T001	NA	NA	NA	NA		protein_coding	0.0001	0.0001	0.0001	2.26423	2.74362	3.43813	3.55199e-05	-14.781	9.96312e-13	3.02808e-11	down	yes
Zm00001d033384	Zm00001d033384	Zm00001d033384_T001	GO:0009507(chloroplast);GO:0009816(defense response to bacterium, incompatible interaction)	NA	NA	NA		protein_coding	0.0001	0.0001	0.0001	2.42702	2.614	3.14712	3.66383e-05	-14.7363	1.08412e-12	3.29026e-11	down	yes
Zm00001d044387	Zm00001d044387	Zm00001d044387_T001	GO:0003333(amino acid transmembrane transport);GO:0005886(plasma membrane);GO:0015171(amino acid transmembrane transporter activity);GO:0016020(membrane);GO:0016021(integral component of membrane)	NA	NA	NA	Transmembrane amino acid transporter family protein	protein_coding	0.603353	0.444704	0.714601	0.0001	0.0001	0.0001	5875.53	12.5205	1.10435e-12	3.34686e-11	up	yes
Zm00001d046416	Zm00001d046416	Zm00001d046416_T001	GO:0004497(monooxygenase activity);GO:0005506(iron ion binding);GO:0016020(membrane);GO:0016491(oxidoreductase activity);GO:0016705(oxidoreductase activity, acting on paired donors, with incorporation or reduction of molecular oxygen);GO:0016709(oxidoreductase activity, acting on paired donors, with incorporation or reduction of molecular oxygen, NAD(P)H as one donor, and incorporation of one ato…	NA	NA	NA	Putative cytochrome P450 superfamily protein	protein_coding	0.0001	0.0001	0.0001	0.871543	0.799399	1.4547	9.59804e-05	-13.3469	1.11843e-12	3.38472e-11	down	yes
Zm00001d003969	Zm00001d003969	Zm00001d003969_T001	GO:0019148(D-cysteine desulfhydrase activity)	NA	NA	NA	Bifunctional D-cysteine desulfhydrase/1-aminocyclopropane-1-carboxylate deaminase mitochondrial	protein_coding	0.0001	0.0001	0.583889	20.8199	26.413	26.8981	0.00787915	-6.98774	1.16141e-12	3.5098e-11	down	yes
Zm00001d045384	Zm00001d045384	Zm00001d045384_T003;Zm00001d045384_T002;Zm00001d045384_T001	GO:0004784(superoxide dismutase activity);GO:0006801(superoxide metabolic process);GO:0016491(oxidoreductase activity);GO:0019430(removal of superoxide radicals);GO:0042644(chloroplast nucleoid);GO:0046872(metal ion binding);GO:0055114(oxidation-reduction process);GO:0055114(oxidation-reduction process)	04146(Peroxisome);04146(Peroxisome)	K04564	EC:1.15.1.1	Superoxide dismutase [Fe] 3 chloroplastic	protein_coding	0.278434	0.0862211	0.162333	3.6992	3.2152	3.91032	0.0486837	-4.36042	1.17567e-12	3.54785e-11	down	yes
Zm00001d027946	hydroxycinnamoyltransferase1	Zm00001d027946_T001	GO:0016740(transferase activity);GO:0016747(transferase activity, transferring acyl groups other than amino-acyl groups)	NA	NA	NA	hydroxycinnamoyltransferase1	protein_coding	1.41529	1.06435	0.657075	0.0001	0.0001	0.0001	10455.7	13.352	1.18108e-12	3.55915e-11	up	yes
Zm00001d031179	ras-related protein RHN1	Zm00001d031179_T001	GO:0000139(Golgi membrane);GO:0003924(GTPase activity);GO:0005525(GTP binding);GO:0005768(endosome);GO:0005886(plasma membrane);GO:0006886(intracellular protein transport);GO:0010256(endomembrane system organization);GO:0012505(endomembrane system);GO:0030139(endocytic vesicle);GO:0032482(Rab protein signal transduction);GO:0032586(protein storage vacuole membrane)	04144(Endocytosis);04145(Phagosome)	K07889	NA	ras-related protein RHN1	protein_coding	0.599872	1.91127	1.4911	13.5935	9.71185	12.7485	0.111007	-3.17127	1.19177e-12	3.58626e-11	down	yes
Zm00001d010553	Zm00001d010553	Zm00001d010553_T001	NA	NA	NA	NA		protein_coding	0.0001	0.0001	0.0001	3.13115	1.51013	2.04582	4.48625e-05	-14.4441	1.19486e-12	3.5905e-11	down	yes
Zm00001d048372	Zm00001d048372	Zm00001d048372_T001;Zm00001d048372_T003;Zm00001d048372_T004;Zm00001d048372_T002	GO:0000166(nucleotide binding);GO:0004812(aminoacyl-tRNA ligase activity);GO:0004818(glutamate-tRNA ligase activity);GO:0004819(glutamine-tRNA ligase activity);GO:0005524(ATP binding);GO:0005737(cytoplasm);GO:0005739(mitochondrion);GO:0005829(cytosol);GO:0006412(translation);GO:0006418(tRNA aminoacylation for protein translation);GO:0006424(glutamyl-tRNA aminoacylation);GO:0006425(glutaminyl-tRNA…	NA	NA	NA	Glutamyl-tRNA synthetase%2C cytoplasmic	protein_coding	0.809544	1.57523	0.839345	0.0227703	0.0001	0.0001	140.36	7.13299	1.2264e-12	3.68006e-11	up	yes
Zm00001d021896	Zm00001d021896	Zm00001d021896_T001	GO:0002229(defense response to oomycetes);GO:0004672(protein kinase activity);GO:0004675(transmembrane receptor protein serine/threonine kinase activity);GO:0005524(ATP binding);GO:0005886(plasma membrane);GO:0006468(protein phosphorylation);GO:0006952(defense response);GO:0007178(transmembrane receptor protein serine/threonine kinase signaling pathway);GO:0016020(membrane);GO:0016021(integral co…	NA	NA	NA	L-type lectin-domain containing receptor kinase V.9	protein_coding	0.306619	1.49912	1.39684	0.0001	0.0001	0.0001	10675.2	13.382	1.29485e-12	3.88e-11	up	yes
Zm00001d032809	Zm00001d032809	Zm00001d032809_T001	GO:0016020(membrane);GO:0016021(integral component of membrane)	NA	NA	NA		protein_coding	6.34562	6.48201	4.79576	0.147142	0.213104	0.069884	40.9722	5.35657	1.31642e-12	3.93909e-11	up	yes
Zm00001d034837	Zm00001d034837	Zm00001d034837_T001	GO:0005634(nucleus);GO:0005737(cytoplasm);GO:0006355(regulation of transcription, DNA-templated);GO:0006606(protein import into nucleus);GO:0008139(nuclear localization sequence binding);GO:0061608(nuclear import signal receptor activity)	NA	NA	NA	ARM repeat superfamily protein	protein_coding	0.0001	0.0001	0.0001	0.907508	1.26476	0.937193	9.64799e-05	-13.3394	1.37186e-12	4.0992e-11	down	yes
Zm00001d044620	Zm00001d044620	Zm00001d044620_T001;Zm00001d044620_T004;Zm00001d044620_T006;Zm00001d044620_T003;Zm00001d044620_T002	GO:0005515(protein binding);GO:0005515(protein binding)	NA	NA	NA	DCD (Development and Cell Death) domain protein	protein_coding	0.061589	0.157202	0.153712	1.18934	1.32207	3.08032	0.0666166	-3.90797	1.37455e-12	4.10149e-11	down	yes
Zm00001d007210	Zm00001d007210	Zm00001d007210_T001	GO:0046872(metal ion binding)	NA	NA	NA		protein_coding	0.662432	1.09585	0.779011	0.0001	0.0001	0.0001	8457.64	13.046	1.39709e-12	4.1629e-11	up	yes
Zm00001d021153	Zm00001d021153	Zm00001d021153_T001	GO:0005525(GTP binding);GO:0016787(hydrolase activity)	NA	NA	NA	P-loop containing nucleoside triphosphate hydrolases superfamily protein	protein_coding	0.0001	0.0001	0.0001	0.745287	1.07734	1.76048	8.37262e-05	-13.544	1.41865e-12	4.22122e-11	down	yes
Zm00001d003019	Zm00001d003019	Zm00001d003019_T003;Zm00001d003019_T004;Zm00001d003019_T001;Zm00001d003019_T007;Zm00001d003019_T006;Zm00001d003019_T002;Zm00001d003019_T005	GO:0000166(nucleotide binding);GO:0004672(protein kinase activity);GO:0004674(protein serine/threonine kinase activity);GO:0005509(calcium ion binding);GO:0005524(ATP binding);GO:0005886(plasma membrane);GO:0006468(protein phosphorylation);GO:0007166(cell surface receptor signaling pathway);GO:0016020(membrane);GO:0016021(integral component of membrane);GO:0016301(kinase activity);GO:0016310(phos…	NA	NA	NA	Protein kinase superfamily protein	protein_coding	0.454861	5.03011	3.43478	0.115585	0.0494531	0.0679582	38.2827	5.25862	1.47543e-12	4.38405e-11	up	yes
Zm00001d016183	Zm00001d016183	Zm00001d016183_T001	GO:0005198(structural molecule activity);GO:0005515(protein binding);GO:0006888(endoplasmic reticulum to Golgi vesicle-mediated transport);GO:0006890(retrograde vesicle-mediated transport, Golgi to endoplasmic reticulum);GO:0006891(intra-Golgi vesicle-mediated transport);GO:0016020(membrane);GO:0016021(integral component of membrane);GO:0030126(COPI vesicle coat)	NA	NA	NA	Coatomer subunit epsilon-2	protein_coding	1.24028	1.88118	1.24261	0.0001	0.0001	0.0001	14546.9	13.8284	1.53419e-12	4.55228e-11	up	yes
Zm00001d044876	Zm00001d044876	Zm00001d044876_T001;Zm00001d044876_T003;Zm00001d044876_T002	GO:0005739(mitochondrion);GO:0005739(mitochondrion)	NA	NA	NA		protein_coding	0.0001	0.0001	0.0001	1.02639	0.770698	1.19841	0.00010015	-13.2855	1.56961e-12	4.65091e-11	down	yes
Zm00001d031200	Zm00001d031200	Zm00001d031200_T001;Zm00001d031200_T002	GO:0005789(endoplasmic reticulum membrane);GO:0006696(ergosterol biosynthetic process);GO:0016020(membrane);GO:0016021(integral component of membrane);GO:0030674(protein-macromolecule adaptor activity);GO:0030674(protein-macromolecule adaptor activity)	NA	NA	NA	Ergosterol biosynthetic protein 28	protein_coding	0.0001	0.0001	0.0001	2.76199	1.88168	2.38929	4.26563e-05	-14.5169	1.61938e-12	4.79169e-11	down	yes
Zm00001d054062	Zm00001d054062	Zm00001d054062_T001	GO:0004672(protein kinase activity);GO:0004674(protein serine/threonine kinase activity);GO:0005509(calcium ion binding);GO:0005524(ATP binding);GO:0005886(plasma membrane);GO:0006468(protein phosphorylation);GO:0007166(cell surface receptor signaling pathway);GO:0016020(membrane);GO:0016021(integral component of membrane);GO:0016301(kinase activity);GO:0016310(phosphorylation);GO:0030247(polysac…	NA	NA	NA	Putative wall-associated receptor protein kinase family protein	protein_coding	0.686027	1.12699	1.03407	5.91715	7.56247	5.83034	0.147442	-2.76178	1.71106e-12	5.05594e-11	down	yes
Zm00001d040197	Zm00001d040197	Zm00001d040197_T001	NA	NA	NA	NA		protein_coding	7.82371	14.8233	17.9008	1.78107	1.44074	1.38458	8.80253	3.13792	1.72667e-12	5.09499e-11	up	yes
Zm00001d039640	Zm00001d039640	Zm00001d039640_T001	GO:0016787(hydrolase activity)	NA	NA	NA	Double Clp-N motif-containing P-loop nucleoside triphosphate hydrolases superfamily protein	protein_coding	3.08579	3.44924	3.24175	0.09217	0.109936	0.0001	48.3506	5.59546	1.76075e-12	5.18835e-11	up	yes
Zm00001d005313	Zm00001d005313	Zm00001d005313_T001	GO:0006629(lipid metabolic process);GO:0016787(hydrolase activity)	NA	NA	NA	alpha/beta-Hydrolases superfamily protein	protein_coding	0.376567	0.736925	0.467609	4.76018	4.80743	5.49473	0.10497	-3.25195	1.76546e-12	5.19503e-11	down	yes
Zm00001d032985	Zm00001d032985	Zm00001d032985_T001	GO:0000166(nucleotide binding);GO:0000723(telomere maintenance);GO:0003678(DNA helicase activity);GO:0004386(helicase activity);GO:0005524(ATP binding);GO:0006281(DNA repair);GO:0006310(DNA recombination);GO:0006974(cellular response to DNA damage stimulus);GO:0016787(hydrolase activity);GO:0032508(DNA duplex unwinding)	NA	NA	NA	ATP-dependent DNA helicase [Source:UniProtKB/TrEMBL;Acc:A0A1D6KVL1]	protein_coding	0.146085	0.536009	0.412438	0.0001	0.0001	0.0001	3648.44	11.8331	1.79835e-12	5.28451e-11	up	yes
Zm00001d014632	Zm00001d014632	Zm00001d014632_T002;Zm00001d014632_T006;Zm00001d014632_T004;Zm00001d014632_T003;Zm00001d014632_T001;Zm00001d014632_T005;Zm00001d014632_T007	GO:0004784(superoxide dismutase activity);GO:0006801(superoxide metabolic process);GO:0016491(oxidoreductase activity);GO:0019430(removal of superoxide radicals);GO:0042644(chloroplast nucleoid);GO:0046872(metal ion binding);GO:0055114(oxidation-reduction process);GO:0055114(oxidation-reduction process)	04146(Peroxisome);04146(Peroxisome)	K04564	EC:1.15.1.1	Superoxide dismutase [Fe] 3 chloroplastic	protein_coding	0.0001	0.0238082	0.0001	1.1497	0.621933	1.37334	0.00763381	-7.03338	1.82024e-12	5.34145e-11	down	yes
Zm00001d001852	umc2186	Zm00001d001852_T001;Zm00001d001852_T002	NA	NA	NA	NA	Gibberellin-regulated protein 2	protein_coding	3.87178	1.83242	2.19381	0.0001	0.0001	0.0001	26326.7	14.6842	1.85096e-12	5.42412e-11	up	yes
Zm00001d009356	Zm00001d009356	Zm00001d009356_T001	GO:0006886(intracellular protein transport);GO:0034066(RIC1-RGP1 guanyl-nucleotide exchange factor complex)	NA	NA	NA	Quinoprotein amine dehydrogenase beta chain-like; RIC1-like guanyl-nucleotide exchange factor	protein_coding	0.0001	0.0001	0.0001	4.0887	2.75712	5.62316	2.40597e-05	-15.343	1.90017e-12	5.56068e-11	down	yes
Zm00001d022589	Zm00001d022589	Zm00001d022589_T008;Zm00001d022589_T005;Zm00001d022589_T002;Zm00001d022589_T006;Zm00001d022589_T001;Zm00001d022589_T010;Zm00001d022589_T004;Zm00001d022589_T007;Zm00001d022589_T003;Zm00001d022589_T009;Zm00001d022589_T011	GO:0016020(membrane);GO:0016021(integral component of membrane);GO:0016021(integral component of membrane)	NA	NA	NA		protein_coding	0.30846	0.516674	0.31606	0.0001	0.0001	0.0001	3803.98	11.8933	1.93976e-12	5.66873e-11	up	yes
Zm00001d045377	Zm00001d045377	Zm00001d045377_T001	NA	NA	NA	NA		protein_coding	0.0001	0.0001	0.0001	3.7715	0.190185	1.62837	5.36667e-05	-14.1856	1.9703e-12	5.75009e-11	down	yes
Zm00001d046689	Zm00001d046689	Zm00001d046689_T001	GO:0003676(nucleic acid binding);GO:0008270(zinc ion binding)	NA	NA	NA		protein_coding	5.31602	1.88978	3.05785	0.0001	0.08265	0.055451	74.2661	6.21463	2.0499e-12	5.97419e-11	up	yes
Zm00001d028116	Zm00001d028116	Zm00001d028116_T001	GO:0004568(chitinase activity);GO:0006032(chitin catabolic process);GO:0016998(cell wall macromolecule catabolic process);GO:0050832(defense response to fungus)	NA	NA	NA		protein_coding	1.2224	7.85254	2.9068	0.0001	0.0001	0.0001	39939.1	15.2855	2.15267e-12	6.26513e-11	up	yes
Zm00001d001399	Zm00001d001399	Zm00001d001399_T001	NA	NA	NA	NA		lincRNA	0.0001	0.0001	0.094039	3.89115	3.76346	5.23226	0.00731279	-7.09536	2.18027e-12	6.33678e-11	down	yes
Zm00001d020534	Zm00001d020534	Zm00001d020534_T001	GO:0003677(DNA binding);GO:0005634(nucleus);GO:0042025(host cell nucleus);GO:0046872(metal ion binding)	NA	NA	NA	Squamosa promoter-binding-like protein 18	protein_coding	1.79681	2.12258	1.86504	0.0001	0.0001	0.0001	19281.5	14.2349	2.20442e-12	6.39823e-11	up	yes
Zm00001d045227	Zm00001d045227	Zm00001d045227_T001	GO:0000976(transcription regulatory region sequence-specific DNA binding);GO:0000977(RNA polymerase II regulatory region sequence-specific DNA binding);GO:0000981(DNA-binding transcription factor activity, RNA polymerase II-specific);GO:0000982(GO_0000982);GO:0003677(DNA binding);GO:0005634(nucleus);GO:0006351(transcription, DNA-templated);GO:0007275(multicellular organism development);GO:0008134…	NA	NA	NA	Agamous-like MADS-box AGL8-like protein	protein_coding	0.0001	0.0001	0.0001	3.51059	4.92117	2.5137	2.74086e-05	-15.155	2.20903e-12	6.40287e-11	down	yes
Zm00001d024055	Zm00001d024055	Zm00001d024055_T001	NA	NA	NA	NA	Expressed protein; protein	protein_coding	0.0001	0.0001	0.0001	1.73144	2.17644	0.411704	6.94512e-05	-13.8136	2.24961e-12	6.51161e-11	down	yes
Zm00001d037355	Zm00001d037355	Zm00001d037355_T001	NA	NA	NA	NA		protein_coding	1.72689	1.98423	1.49332	0.0001	0.0001	0.0001	17348.2	14.0825	2.25536e-12	6.51939e-11	up	yes
Zm00001d025266	Zm00001d025266	Zm00001d025266_T001	GO:0000976(transcription regulatory region sequence-specific DNA binding);GO:0003682(chromatin binding);GO:0003743(translation initiation factor activity);GO:0005669(transcription factor TFIID complex);GO:0006367(transcription initiation from RNA polymerase II promoter);GO:0006413(translational initiation);GO:0045944(positive regulation of transcription by RNA polymerase II)	NA	NA	NA	Transcription initiation factor TFIID subunit 2	protein_coding	0.0001	0.020045	0.0001	1.15387	1.42333	1.48043	0.00498937	-7.64693	2.30188e-12	6.64485e-11	down	yes
Zm00001d016910	Zm00001d016910	Zm00001d016910_T001	GO:0008194(UDP-glycosyltransferase activity);GO:0016740(transferase activity);GO:0016757(transferase activity, transferring glycosyl groups);GO:0016758(transferase activity, transferring hexosyl groups);GO:0043231(intracellular membrane-bounded organelle)	NA	NA	NA	UDP-glycosyltransferase 85A7	protein_coding	0.124087	0.0001	0.0001	2.46312	13.4628	11.8483	0.0044749	-7.80393	2.31208e-12	6.66524e-11	down	yes
Zm00001d016956	Zm00001d016956	Zm00001d016956_T006;Zm00001d016956_T002;Zm00001d016956_T012;Zm00001d016956_T011;Zm00001d016956_T008;Zm00001d016956_T013;Zm00001d016956_T004;Zm00001d016956_T005;Zm00001d016956_T015;Zm00001d016956_T007;Zm00001d016956_T010;Zm00001d016956_T014;Zm00001d016956_T016;Zm00001d016956_T001;Zm00001d016956_T003;Zm00001d016956_T009	NA	NA	NA	NA		protein_coding	14.2175	11.8689	10.6276	0.850827	1.99931	1.56612	8.31338	3.05543	2.3391e-12	6.73403e-11	up	yes
Zm00001d032284	Zm00001d032284	Zm00001d032284_T002;Zm00001d032284_T001	GO:0016614(oxidoreductase activity, acting on CH-OH group of donors);GO:0050660(flavin adenine dinucleotide binding);GO:0055114(oxidation-reduction process);GO:0055114(oxidation-reduction process)	NA	NA	NA	Protein HOTHEAD	protein_coding	2.34356	2.51447	1.55418	0.0001	0.055242	0.0001	115.656	6.8537	2.37546e-12	6.82944e-11	up	yes
Zm00001d019805	Zm00001d019805	Zm00001d019805_T001;Zm00001d019805_T002;Zm00001d019805_T004;Zm00001d019805_T003	GO:0000462(maturation of SSU-rRNA from tricistronic rRNA transcript (SSU-rRNA, 5.8S rRNA, LSU-rRNA));GO:0003735(structural constituent of ribosome);GO:0005840(ribosome);GO:0006412(translation);GO:0008168(methyltransferase activity);GO:0022627(cytosolic small ribosomal subunit);GO:0022627(cytosolic small ribosomal subunit)	NA	NA	NA	CMV 1a interacting protein 1	protein_coding	2.69576	0.372735	2.48137	0.0001	0.0001	0.0001	18499.6	14.1752	2.37986e-12	6.83286e-11	up	yes
Zm00001d037406	Zm00001d037406	Zm00001d037406_T001	GO:0015238(GO_0015238);GO:0015297(antiporter activity);GO:0016020(membrane);GO:0022857(transmembrane transporter activity);GO:0042908(xenobiotic transport);GO:0042910(xenobiotic transmembrane transporter activity);GO:0055085(transmembrane transport)	NA	NA	NA	Protein TRANSPARENT TESTA 12	protein_coding	1.52292	1.62119	1.48106	0.0001	0.0001	0.0001	15417.2	13.9123	2.40535e-12	6.89673e-11	up	yes
Zm00001d004756	Zm00001d004756	Zm00001d004756_T001	GO:0005506(iron ion binding);GO:0005634(nucleus);GO:0005737(cytoplasm);GO:0006555(methionine metabolic process);GO:0008652(cellular amino acid biosynthetic process);GO:0009086(methionine biosynthetic process);GO:0010309(acireductone dioxygenase [iron(II)-requiring] activity);GO:0016491(oxidoreductase activity);GO:0019509(L-methionine salvage from methylthioadenosine);GO:0046872(metal ion binding)…	NA	NA	NA	12-dihydroxy-3-keto-5-methylthiopentene dioxygenase 4	protein_coding	0.975615	4.58552	1.88197	0.0001	0.0001	0.0001	24810.4	14.5987	2.41869e-12	6.92567e-11	up	yes
Zm00001d053221	Zm00001d053221	Zm00001d053221_T001;Zm00001d053221_T002	NA	NA	NA	NA		protein_coding	0.0001	0.0001	0.0001	1.19932	1.79403	0.576946	8.40267e-05	-13.5388	2.44407e-12	6.98893e-11	down	yes
Zm00001d006639	Zm00001d006639	Zm00001d006639_T001	NA	NA	NA	NA		protein_coding	4.10979	11.3461	8.80864	0.31261	0.597791	0.32271	19.6774	4.29847	2.69442e-12	7.69446e-11	up	yes
Zm00001d010719	Zm00001d010719	Zm00001d010719_T002;Zm00001d010719_T007;Zm00001d010719_T001;Zm00001d010719_T023;Zm00001d010719_T022;Zm00001d010719_T015;Zm00001d010719_T012;Zm00001d010719_T011;Zm00001d010719_T008;Zm00001d010719_T021;Zm00001d010719_T017;Zm00001d010719_T005;Zm00001d010719_T003;Zm00001d010719_T004;Zm00001d010719_T024;Zm00001d010719_T006;Zm00001d010719_T010;Zm00001d010719_T009	GO:0003729(mRNA binding);GO:0006355(regulation of transcription, DNA-templated);GO:0006357(regulation of transcription by RNA polymerase II);GO:0006368(transcription elongation from RNA polymerase II promoter);GO:0032044(DSIF complex);GO:0032784(regulation of DNA-templated transcription, elongation);GO:0032784(regulation of DNA-templated transcription, elongation)	NA	NA	NA	Protein RNA-directed DNA methylation 3	protein_coding	4.15169	3.28189	4.50305	0.701377	0.751369	0.612607	5.77946	2.53094	2.71493e-12	7.74265e-11	up	yes
Zm00001d019511	Zm00001d019511	Zm00001d019511_T001	NA	NA	NA	NA		protein_coding	0.0001	0.0001	0.0001	1.21762	0.936188	2.40637	6.57869e-05	-13.8918	2.74571e-12	7.81556e-11	down	yes
Zm00001d047275	Zm00001d047275	Zm00001d047275_T001;Zm00001d047275_T003;Zm00001d047275_T002;Zm00001d047275_T004	GO:0006629(lipid metabolic process);GO:0008081(phosphoric diester hydrolase activity);GO:0008081(phosphoric diester hydrolase activity)	NA	NA	NA	PLC-like phosphodiesterases superfamily protein	protein_coding	4.39848	12.1163	12.6262	0.0001	0.289562	0.0367282	89.2827	6.48031	2.74784e-12	7.81556e-11	up	yes
Zm00001d022453	Zm00001d022453	Zm00001d022453_T001	GO:0004601(peroxidase activity);GO:0005576(extracellular region);GO:0006979(response to oxidative stress);GO:0016491(oxidoreductase activity);GO:0020037(heme binding);GO:0042744(hydrogen peroxide catabolic process);GO:0046872(metal ion binding);GO:0055114(oxidation-reduction process);GO:0098869(cellular oxidant detoxification)	00940(Phenylpropanoid biosynthesis)	K00430	EC:1.11.1.7	Peroxidase 52	protein_coding	0.15827	0.0001	0.0001	4.40049	11.6186	10.9912	0.00586703	-7.41315	2.76843e-12	7.8636e-11	down	yes
Zm00001d049250	Zm00001d049250	Zm00001d049250_T001	GO:0004672(protein kinase activity);GO:0005524(ATP binding);GO:0005634(nucleus);GO:0005737(cytoplasm);GO:0006468(protein phosphorylation);GO:0010468(regulation of gene expression);GO:0016301(kinase activity);GO:0016310(phosphorylation);GO:0035556(intracellular signal transduction)	NA	NA	NA	Protein kinase superfamily protein	protein_coding	0.0001	0.0001	0.0001	2.3378	3.20992	0.57039	4.90348e-05	-14.3158	2.94827e-12	8.36087e-11	down	yes
Zm00001d028711	MAP kinase3	Zm00001d028711_T006;Zm00001d028711_T005;Zm00001d028711_T004;Zm00001d028711_T002;Zm00001d028711_T001;Zm00001d028711_T003	GO:0000165(MAPK cascade);GO:0000166(nucleotide binding);GO:0004672(protein kinase activity);GO:0004674(protein serine/threonine kinase activity);GO:0004707(MAP kinase activity);GO:0005524(ATP binding);GO:0005622(intracellular);GO:0005634(nucleus);GO:0005737(cytoplasm);GO:0006468(protein phosphorylation);GO:0010468(regulation of gene expression);GO:0016301(kinase activity);GO:0016310(phosphorylati…	04016(MAPK signaling pathway - plant);04016(MAPK signaling pathway - plant)	K20536	EC:2.7.11.24	MAP kinase3	protein_coding	0.101361	0.414239	0.248409	6.04116	3.54585	3.66064	0.0576713	-4.116	2.95136e-12	8.36087e-11	down	yes
Zm00001d047659	Zm00001d047659	Zm00001d047659_T001;Zm00001d047659_T002	GO:0005634(nucleus);GO:0016567(protein ubiquitination);GO:0061630(ubiquitin protein ligase activity);GO:0061630(ubiquitin protein ligase activity)	NA	K13125	NA	phosphoinositide binding	protein_coding	0.834935	1.7006	0.605239	0.0001	0.0001	0.0001	10469.2	13.3539	3.12844e-12	8.84914e-11	up	yes
Zm00001d012382	Zm00001d012382	Zm00001d012382_T002;Zm00001d012382_T001	GO:0016787(hydrolase activity);GO:0016787(hydrolase activity)	NA	NA	NA	Adenine nucleotide alpha hydrolases-like superfamily protein	protein_coding	0.945275	1.01472	0.899251	0.0001	0.0001	0.0001	9530.82	13.2184	3.13203e-12	8.84914e-11	up	yes
Zm00001d001672	Zm00001d001672	Zm00001d001672_T001	NA	NA	NA	NA		lincRNA	0.0001	0.0001	0.0001	3.73605	1.27572	2.35066	4.07474e-05	-14.5829	3.13637e-12	8.84963e-11	down	yes
Zm00001d015270	Zm00001d015270	Zm00001d015270_T001	NA	NA	NA	NA		protein_coding	0.0001	0.0001	0.022233	1.32891	1.76522	1.68198	0.00469692	-7.73407	3.29412e-12	9.28244e-11	down	yes
Zm00001d004389	Zm00001d004389	Zm00001d004389_T001	GO:0004497(monooxygenase activity);GO:0004499(N,N-dimethylaniline monooxygenase activity);GO:0016491(oxidoreductase activity);GO:0050660(flavin adenine dinucleotide binding);GO:0050661(NADP binding);GO:0055114(oxidation-reduction process)	NA	NA	NA	Probable flavin-containing monooxygenase 1	protein_coding	1.09068	5.64864	3.20378	22.6533	32.3108	24.7325	0.124762	-3.00275	3.36531e-12	9.47051e-11	down	yes
Zm00001d015054	terpene synthase3	Zm00001d015054_T001	GO:0000287(magnesium ion binding);GO:0009507(chloroplast);GO:0009536(plastid);GO:0009611(response to wounding);GO:0010333(terpene synthase activity);GO:0016114(terpenoid biosynthetic process);GO:0016829(lyase activity);GO:0031347(regulation of defense response);GO:0046872(metal ion binding)	NA	NA	NA	terpene synthase3	protein_coding	0.370287	0.854079	0.859378	0.0001	0.0001	0.0001	6945.81	12.7619	3.43628e-12	9.65745e-11	up	yes
Zm00001d010648	Zm00001d010648	Zm00001d010648_T001;Zm00001d010648_T002	NA	NA	NA	NA		protein_coding	0.746208	0.642741	0.700469	0.0001	0.0001	0.0001	6964.72	12.7659	3.44765e-12	9.67662e-11	up	yes
Zm00001d044190	Zm00001d044190	Zm00001d044190_T001	NA	NA	NA	NA		protein_coding	1.98086	4.19878	4.19934	0.0001	0.0001	0.0001	34596.6	15.0783	3.49955e-12	9.80935e-11	up	yes
Zm00001d038384	Zm00001d038384	Zm00001d038384_T001	GO:0004497(monooxygenase activity);GO:0005506(iron ion binding);GO:0016705(oxidoreductase activity, acting on paired donors, with incorporation or reduction of molecular oxygen);GO:0020037(heme binding);GO:0055114(oxidation-reduction process)	NA	NA	NA	Secologanin synthase	protein_coding	0.0001	0.0001	0.0001	1.48731	3.22749	2.17772	4.35255e-05	-14.4878	3.74787e-12	1.04916e-10	down	yes
Zm00001d006340	Zm00001d006340	Zm00001d006340_T003;Zm00001d006340_T001;Zm00001d006340_T002	GO:0003824(catalytic activity);GO:0016020(membrane);GO:0016021(integral component of membrane);GO:0030151(molybdenum ion binding);GO:0030170(pyridoxal phosphate binding);GO:0030170(pyridoxal phosphate binding)	NA	NA	NA	Molybdenum cofactor sulfurase family protein	protein_coding	48.9277	38.7769	41.3321	4.65095	7.89726	6.46984	6.78496	2.76234	3.77481e-12	1.05531e-10	up	yes
Zm00001d012090	Zm00001d012090	Zm00001d012090_T001	NA	NA	NA	NA		protein_coding	64.4936	70.6102	186.914	1.00978	5.64775	6.62397	24.2456	4.59965	3.88818e-12	1.08512e-10	up	yes
Zm00001d036651	Zm00001d036651	Zm00001d036651_T005;Zm00001d036651_T001;Zm00001d036651_T004;Zm00001d036651_T003;Zm00001d036651_T002	GO:0005515(protein binding);GO:0005515(protein binding)	NA	NA	NA	F10K1.23	protein_coding	0.343091	0.728893	0.547923	2.41568	7.22268	10.1001	0.0820686	-3.60703	3.89165e-12	1.08512e-10	down	yes
Zm00001d020500	Zm00001d020500	Zm00001d020500_T001;Zm00001d020500_T002	NA	NA	NA	NA		protein_coding	1.47593	2.30773	2.90949	12.7148	11.3868	25.6545	0.134519	-2.89412	3.98284e-12	1.1091e-10	down	yes
Zm00001d014757	Zm00001d014757	Zm00001d014757_T001	GO:0004857(enzyme inhibitor activity);GO:0043086(negative regulation of catalytic activity)	NA	NA	NA	pectin methylesterase inhibitor 1	protein_coding	14.657	33.4488	20.1036	2.95483	3.32798	2.17636	8.06337	3.01138	4.16801e-12	1.15914e-10	up	yes
Zm00001d026664	Zm00001d026664	Zm00001d026664_T001	GO:0009506(plasmodesma);GO:0016020(membrane);GO:0016021(integral component of membrane);GO:0046658(anchored component of plasma membrane)	NA	NA	NA	NDR1/HIN1-like 1	protein_coding	19.3242	45.0887	45.9677	4.64523	6.33305	2.25454	8.34143	3.06029	4.22853e-12	1.17444e-10	up	yes
Zm00001d027738	Zm00001d027738	Zm00001d027738_T001	GO:0031047(gene silencing by RNA)	NA	NA	NA	XS domain containing protein expressed	protein_coding	0.71193	0.964741	1.0588	0.0001	0.0001	0.0001	9118.23	13.1545	4.27735e-12	1.18645e-10	up	yes
Zm00001d047907	Zm00001d047907	Zm00001d047907_T001	GO:0003677(DNA binding)	NA	NA	NA	Putative homeodomain-like transcription factor superfamily protein	protein_coding	0.0001	0.0001	0.0001	1.94645	1.2985	2.23061	5.47889e-05	-14.1558	4.45449e-12	1.23398e-10	down	yes
Zm00001d023941	Zm00001d023941	Zm00001d023941_T001;Zm00001d023941_T002	GO:0005351(carbohydrate:proton symporter activity);GO:0005355(glucose transmembrane transporter activity);GO:0005887(integral component of plasma membrane);GO:0008645(hexose transmembrane transport);GO:0016020(membrane);GO:0016021(integral component of membrane);GO:0022857(transmembrane transporter activity);GO:0046323(glucose import);GO:0055085(transmembrane transport);GO:1902600(proton transmem…	NA	NA	NA	Carbohydrate transporter/ sugar porter	protein_coding	2.31935	9.64463	19.822	0.574567	0.153794	0.131491	36.9668	5.20816	4.58702e-12	1.26903e-10	up	yes
Zm00001d021982	Zm00001d021982	Zm00001d021982_T001	GO:0003824(catalytic activity);GO:0004758(serine C-palmitoyltransferase activity);GO:0005737(cytoplasm);GO:0009058(biosynthetic process);GO:0017059(serine C-palmitoyltransferase complex);GO:0030170(pyridoxal phosphate binding);GO:0046512(sphingosine biosynthetic process);GO:0046513(ceramide biosynthetic process)	NA	NA	NA	Long chain base biosynthesis protein 2a	protein_coding	0.525579	1.7683	1.33056	0.0001	0.0001	0.0001	12081.5	13.5605	4.71015e-12	1.30141e-10	up	yes
Zm00001d032498	Zm00001d032498	Zm00001d032498_T001	NA	NA	NA	NA	Tubulin-folding cofactor D	protein_coding	1.34219	2.75224	2.21399	0.0001	0.0001	0.0001	21028.1	14.36	4.80671e-12	1.32549e-10	up	yes
Zm00001d031689	Zm00001d031689	Zm00001d031689_T002;Zm00001d031689_T003;Zm00001d031689_T001;Zm00001d031689_T004	GO:0003824(catalytic activity);GO:0004076(biotin synthase activity);GO:0004672(protein kinase activity);GO:0004675(transmembrane receptor protein serine/threonine kinase activity);GO:0004713(protein tyrosine kinase activity);GO:0005524(ATP binding);GO:0005886(plasma membrane);GO:0006468(protein phosphorylation);GO:0007178(transmembrane receptor protein serine/threonine kinase signaling pathway);G…	04626(Plant-pathogen interaction);04626(Plant-pathogen interaction)	K13436	EC:2.7.11.1	PTI1-like tyrosine-protein kinase 3	protein_coding	0.644457	2.06585	1.26291	0.0001	0.0363664	0.018019	72.9226	6.18829	4.80978e-12	1.32549e-10	up	yes
Zm00001d003045	Zm00001d003045	Zm00001d003045_T001	GO:0004553(hydrolase activity, hydrolyzing O-glycosyl compounds);GO:0005975(carbohydrate metabolic process);GO:0008422(beta-glucosidase activity)	NA	NA	NA	Beta-glucosidase 47	protein_coding	0.0001	0.0001	0.0001	0.962251	0.763939	0.661358	0.000125652	-12.9583	5.02888e-12	1.38408e-10	down	yes
Zm00001d037192	Zm00001d037192	Zm00001d037192_T001	GO:0006511(ubiquitin-dependent protein catabolic process);GO:0016020(membrane);GO:0016021(integral component of membrane);GO:0016567(protein ubiquitination);GO:0061630(ubiquitin protein ligase activity)	NA	K10664	EC:2.3.2.27	Putative RING zinc finger domain superfamily protein	protein_coding	2.17743	6.32173	5.47089	0.155366	0.093078	0.0001	56.2075	5.81269	5.04429e-12	1.38653e-10	up	yes
Zm00001d038388	Zm00001d038388	Zm00001d038388_T001	GO:0005886(plasma membrane);GO:0016301(kinase activity);GO:0016310(phosphorylation);GO:0019210(kinase inhibitor activity);GO:0033673(negative regulation of kinase activity)	NA	NA	NA	Probable membrane-associated kinase regulator 4	protein_coding	5.01521	5.34666	8.95177	0.180904	0.0001	0.0001	106.644	6.73666	5.33999e-12	1.46591e-10	up	yes
Zm00001d047301	Zm00001d047301	Zm00001d047301_T001;Zm00001d047301_T007;Zm00001d047301_T022;Zm00001d047301_T012;Zm00001d047301_T004;Zm00001d047301_T008;Zm00001d047301_T023;Zm00001d047301_T016;Zm00001d047301_T018;Zm00001d047301_T010;Zm00001d047301_T026;Zm00001d047301_T014;Zm00001d047301_T024;Zm00001d047301_T009;Zm00001d047301_T002;Zm00001d047301_T029;Zm00001d047301_T028;Zm00001d047301_T021	GO:0004386(helicase activity);GO:0004386(helicase activity)	NA	NA	NA		protein_coding	0.0001	0.0001	0.0001	0.153	0.29854	0.221672	0.000445625	-11.1319	5.59012e-12	1.5326e-10	down	yes
Zm00001d020882	Zm00001d020882	Zm00001d020882_T001	GO:0005515(protein binding)	NA	NA	NA	Plant UBX domain-containing protein 10	protein_coding	16.8732	12.7094	11.1224	2.49818	1.28521	1.2937	8.01738	3.00313	5.61557e-12	1.5376e-10	up	yes
Zm00001d028337	Zm00001d028337	Zm00001d028337_T001;Zm00001d028337_T004;Zm00001d028337_T006;Zm00001d028337_T007;Zm00001d028337_T002;Zm00001d028337_T003;Zm00001d028337_T008;Zm00001d028337_T005	GO:0000166(nucleotide binding);GO:0004672(protein kinase activity);GO:0004674(protein serine/threonine kinase activity);GO:0004675(transmembrane receptor protein serine/threonine kinase activity);GO:0005524(ATP binding);GO:0005886(plasma membrane);GO:0006468(protein phosphorylation);GO:0007178(transmembrane receptor protein serine/threonine kinase signaling pathway);GO:0016020(membrane);GO:001602…	NA	NA	NA	Proline-rich receptor-like protein kinase PERK4	protein_coding	0.0001	0.0001	0.0001	0.212817	0.457343	0.533533	0.000249233	-11.9702	5.67151e-12	1.55092e-10	down	yes
Zm00001d049330	Zm00001d049330	Zm00001d049330_T001	GO:0016020(membrane);GO:0016021(integral component of membrane)	NA	NA	NA		protein_coding	6.28562	39.4213	28.4041	2.08465	1.23768	2.32606	13.1207	3.71378	5.76127e-12	1.57344e-10	up	yes
Zm00001d031119	Zm00001d031119	Zm00001d031119_T001	NA	NA	NA	NA	Protein DYAD	protein_coding	0.0001	0.0001	0.0001	0.378524	0.622636	1.22792	0.000134584	-12.8592	6.00583e-12	1.63813e-10	down	yes
Zm00001d034336	Zm00001d034336	Zm00001d034336_T005;Zm00001d034336_T004;Zm00001d034336_T006;Zm00001d034336_T001;Zm00001d034336_T003;Zm00001d034336_T002	NA	NA	NA	NA		protein_coding	0.726228	1.1156	0.872943	0.0001	0.0001	0.0001	9049.25	13.1436	6.11977e-12	1.66707e-10	up	yes
Zm00001d045729	Zm00001d045729	Zm00001d045729_T002;Zm00001d045729_T003;Zm00001d045729_T001	GO:0005515(protein binding);GO:0016301(kinase activity);GO:0016310(phosphorylation);GO:0016310(phosphorylation)	NA	NA	NA	Protein NSP-INTERACTING KINASE 1	protein_coding	5.77345	11.0753	12.7231	0.348024	0.0001	0.097838	66.3101	6.05116	6.15603e-12	1.6748e-10	up	yes
Zm00001d000706	Zm00001d000706	Zm00001d000706_T001	NA	NA	NA	NA		lincRNA	0.0001	0.060952	0.0001	2.4197	3.46725	3.97031	0.00620375	-7.33264	6.50366e-12	1.76712e-10	down	yes
Zm00001d006236	MYB31 transcription factor31	Zm00001d006236_T003;Zm00001d006236_T001;Zm00001d006236_T002;Zm00001d006236_T006;Zm00001d006236_T009;Zm00001d006236_T008;Zm00001d006236_T004;Zm00001d006236_T007;Zm00001d006236_T005	GO:0000976(transcription regulatory region sequence-specific DNA binding);GO:0003677(DNA binding);GO:0003700(DNA-binding transcription factor activity);GO:0005634(nucleus);GO:0006355(regulation of transcription, DNA-templated);GO:0030154(cell differentiation);GO:0043565(sequence-specific DNA binding);GO:0044212(transcription regulatory region DNA binding);GO:0044212(transcription regulatory regio…	NA	K09422	NA	MYB31 transcription factor31	protein_coding	9.99619	12.3857	14.2835	2.5395	1.77172	2.35816	5.49758	2.4588	6.6963e-12	1.81714e-10	up	yes
Zm00001d039826	Zm00001d039826	Zm00001d039826_T001	NA	NA	NA	NA		protein_coding	0.878284	0.941631	1.64966	0.0001	0.0001	0.0001	11565.3	13.4975	6.78133e-12	1.83787e-10	up	yes
Zm00001d028001	Zm00001d028001	Zm00001d028001_T001	GO:0003676(nucleic acid binding);GO:0004497(monooxygenase activity);GO:0005506(iron ion binding);GO:0006508(proteolysis);GO:0008234(cysteine-type peptidase activity);GO:0008270(zinc ion binding);GO:0016020(membrane);GO:0016021(integral component of membrane);GO:0016491(oxidoreductase activity);GO:0016705(oxidoreductase activity, acting on paired donors, with incorporation or reduction of molecula…	NA	NA	NA		protein_coding	0.0001	0.0001	0.0001	1.40089	1.2599	1.35753	7.46581e-05	-13.7093	6.86081e-12	1.85704e-10	down	yes
Zm00001d035984	Zm00001d035984	Zm00001d035984_T001;Zm00001d035984_T002;Zm00001d035984_T003	GO:0003883(CTP synthase activity);GO:0006221(pyrimidine nucleotide biosynthetic process);GO:0016985(mannan endo-1,4-beta-mannosidase activity);GO:0016985(mannan endo-1,4-beta-mannosidase activity)	NA	NA	NA		protein_coding	0.0001	0.0001	0.0001	1.11833	1.2296	0.839641	9.41156e-05	-13.3752	7.19622e-12	1.94536e-10	down	yes
Zm00001d017427	Zm00001d017427	Zm00001d017427_T001;Zm00001d017427_T002	GO:0005886(plasma membrane);GO:0010039(response to iron ion);GO:0016020(membrane);GO:0016021(integral component of membrane);GO:0033214(siderophore-dependent iron import into cell);GO:0048316(seed development);GO:0051980(iron-nicotianamine transmembrane transporter activity);GO:0055085(transmembrane transport);GO:0055085(transmembrane transport)	NA	NA	NA	Metal-nicotianamine transporter YSL2	protein_coding	0.28696	1.18962	0.683936	0.0001	0.0001	0.0001	7201.73	12.8141	7.43931e-12	2.00852e-10	up	yes
Zm00001d022516	Zm00001d022516	Zm00001d022516_T001	NA	NA	NA	NA	Stress responsive protein	protein_coding	162.421	533.308	824.772	38.8194	6.88278	21.0541	22.7769	4.5095	7.61019e-12	2.05205e-10	up	yes
Zm00001d053294	Zm00001d053294	Zm00001d053294_T001	NA	NA	NA	NA		protein_coding	0.0001	0.0001	0.0001	1.56982	3.12008	1.51117	4.83787e-05	-14.3353	7.65794e-12	2.06231e-10	down	yes
Zm00001d024575	Zm00001d024575	Zm00001d024575_T001	GO:0005747(mitochondrial respiratory chain complex I)	NA	NA	NA	F1F0-ATPase inhibitor protein; protein	protein_coding	0.0001	0.0001	0.0001	1.60064	1.2063	1.82785	6.47279e-05	-13.9153	7.96138e-12	2.14132e-10	down	yes
Zm00001d050159	Zm00001d050159	Zm00001d050159_T001	GO:0004659(prenyltransferase activity);GO:0008299(isoprenoid biosynthetic process);GO:0009507(chloroplast);GO:0010236(plastoquinone biosynthetic process);GO:0015979(photosynthesis);GO:0016765(transferase activity, transferring alkyl or aryl (other than methyl) groups)	NA	NA	NA	Solanesyl diphosphate synthase 2 chloroplastic	protein_coding	7.51495	8.27153	7.78116	0.467814	0.260248	0.228483	24.6383	4.62283	8.15042e-12	2.1894e-10	up	yes
Zm00001d033831	Zm00001d033831	Zm00001d033831_T001	NA	NA	NA	NA		protein_coding	2.15073	4.89103	4.08952	0.0001	0.0001	0.0001	37104.3	15.1793	8.28541e-12	2.22285e-10	up	yes
Zm00001d015757	Zm00001d015757	Zm00001d015757_T001	NA	NA	NA	NA		protein_coding	1.74558	1.9658	1.66541	0.0001	0.0001	0.0001	17922.6	14.1295	8.52421e-12	2.28404e-10	up	yes
Zm00001d025480	Zm00001d025480	Zm00001d025480_T001	GO:0004843(thiol-dependent ubiquitin-specific protease activity);GO:0006508(proteolysis)	NA	NA	NA	Cysteine proteinases superfamily protein	protein_coding	0.0001	0.0001	0.0001	1.11956	1.29171	1.62017	7.4415e-05	-13.714	8.62184e-12	2.30729e-10	down	yes
Zm00001d006088	Zm00001d006088	Zm00001d006088_T001	GO:0004674(protein serine/threonine kinase activity);GO:0005737(cytoplasm);GO:0005829(cytosol);GO:0006468(protein phosphorylation);GO:0007165(signal transduction);GO:0016301(kinase activity);GO:0016310(phosphorylation)	NA	NA	NA	Shaggy-related protein kinase alpha	protein_coding	0.0001	0.0001	0.048981	1.75771	2.68677	1.99638	0.00763578	-7.03301	8.7091e-12	2.32771e-10	down	yes
Zm00001d031927	Zm00001d031927	Zm00001d031927_T007;Zm00001d031927_T013;Zm00001d031927_T017;Zm00001d031927_T008;Zm00001d031927_T002;Zm00001d031927_T032;Zm00001d031927_T035;Zm00001d031927_T041;Zm00001d031927_T022;Zm00001d031927_T009;Zm00001d031927_T015;Zm00001d031927_T010;Zm00001d031927_T006;Zm00001d031927_T028;Zm00001d031927_T020;Zm00001d031927_T024;Zm00001d031927_T018;Zm00001d031927_T005;Zm00001d031927_T001;Zm00001d031927_T040…	GO:0003743(translation initiation factor activity);GO:0006413(translational initiation);GO:0071011(precatalytic spliceosome);GO:0071011(precatalytic spliceosome)	NA	NA	NA	Transcription initiation factor TFIID subunit 4b	protein_coding	0.0001	0.0001	0.0001	0.103005	0.105818	0.0889198	0.00100758	-9.95489	8.95712e-12	2.391e-10	down	yes
Zm00001d018345	Zm00001d018345	Zm00001d018345_T001;Zm00001d018345_T012;Zm00001d018345_T007;Zm00001d018345_T018;Zm00001d018345_T006;Zm00001d018345_T015;Zm00001d018345_T010;Zm00001d018345_T002;Zm00001d018345_T011;Zm00001d018345_T003;Zm00001d018345_T014;Zm00001d018345_T005;Zm00001d018345_T016;Zm00001d018345_T008;Zm00001d018345_T013;Zm00001d018345_T004;Zm00001d018345_T017;Zm00001d018345_T009	GO:0000469(cleavage involved in rRNA processing);GO:0006886(intracellular protein transport);GO:0015031(protein transport);GO:0016020(membrane);GO:0016192(vesicle-mediated transport);GO:0030131(clathrin adaptor complex);GO:0030131(clathrin adaptor complex)	NA	NA	NA		protein_coding	0.0001	0.0001	0.0001	0.191608	0.187109	0.284413	0.000452401	-11.1101	8.97912e-12	2.39387e-10	down	yes
Zm00001d007056	Zm00001d007056	Zm00001d007056_T001	GO:0000166(nucleotide binding);GO:0006952(defense response);GO:0043531(ADP binding)	NA	NA	NA		protein_coding	0.0001	0.0001	0.0001	1.55582	0.224672	0.715544	0.00012019	-13.0224	9.01648e-12	2.40082e-10	down	yes
Zm00001d038346	Zm00001d038346	Zm00001d038346_T002;Zm00001d038346_T001	NA	NA	NA	NA		protein_coding	0.300041	0.843646	0.286915	2.82783	8.05552	9.49012	0.0702189	-3.832	9.1886e-12	2.44359e-10	down	yes
Zm00001d012754	Zm00001d012754	Zm00001d012754_T001	GO:0005829(cytosol);GO:0008289(lipid binding);GO:0015248(sterol transporter activity);GO:0015918(sterol transport);GO:0016020(membrane);GO:0032934(sterol binding);GO:0043231(intracellular membrane-bounded organelle)	NA	NA	NA	Pleckstrin homology (PH) domain superfamily protein	protein_coding	0.215078	0.230978	0.0001	7.52252	7.04609	5.94687	0.0217473	-5.52302	9.44437e-12	2.50848e-10	down	yes
Zm00001d023901	Zm00001d023901	Zm00001d023901_T001	GO:0000786(nucleosome);GO:0000790(nuclear chromatin);GO:0003677(DNA binding);GO:0005634(nucleus);GO:0005694(chromosome);GO:0006325(chromatin organization);GO:0006342(chromatin silencing);GO:0046982(protein heterodimerization activity)	NA	K11251	NA	Histone H2A	protein_coding	1.38238	1.01721	1.25731	0.0001	0.0001	0.0001	12189.6	13.5734	9.9007e-12	2.6264e-10	up	yes
Zm00001d046155	Zm00001d046155	Zm00001d046155_T001	NA	NA	NA	NA	PLASMODESMATA CALLOSE-BINDING PROTEIN 5	protein_coding	8.86261	4.99038	5.56209	0.582422	0.326559	0.683262	12.1935	3.60804	9.9497e-12	2.63611e-10	up	yes
Zm00001d026521	Zm00001d026521	Zm00001d026521_T005;Zm00001d026521_T001;Zm00001d026521_T008;Zm00001d026521_T003;Zm00001d026521_T007;Zm00001d026521_T006;Zm00001d026521_T002;Zm00001d026521_T004	GO:0006508(proteolysis);GO:0006627(protein processing involved in protein targeting to mitochondrion);GO:0008233(peptidase activity);GO:0008236(serine-type peptidase activity);GO:0016020(membrane);GO:0042720(mitochondrial inner membrane peptidase complex);GO:0042720(mitochondrial inner membrane peptidase complex)	03060(Protein export);03060(Protein export)	K09647	EC:3.4.21.-	Inner membrane protease subunit 1	protein_coding	3.59445	3.46331	2.52754	21.2566	27.6481	16.0573	0.147552	-2.7607	1.0222e-11	2.7049e-10	down	yes
Zm00001d030761	Zm00001d030761	Zm00001d030761_T001	GO:0004497(monooxygenase activity);GO:0005506(iron ion binding);GO:0009507(chloroplast);GO:0009974(zeinoxanthin epsilon hydroxylase activity);GO:0016020(membrane);GO:0016021(integral component of membrane);GO:0016117(carotenoid biosynthetic process);GO:0016491(oxidoreductase activity);GO:0016705(oxidoreductase activity, acting on paired donors, with incorporation or reduction of molecular oxygen)…	NA	NA	NA	Cytochrome P450 97B3 chloroplastic	protein_coding	0.042617	0.150898	0.0001	2.87275	3.02909	2.95999	0.0218482	-5.51634	1.02399e-11	2.70626e-10	down	yes
Zm00001d023886	Zm00001d023886	Zm00001d023886_T001	GO:0005515(protein binding);GO:0009451(RNA modification);GO:0043231(intracellular membrane-bounded organelle)	NA	NA	NA	PPR repeat protein	protein_coding	0.0001	0.0001	0.0001	0.761008	1.23608	1.64169	8.24454e-05	-13.5662	1.03314e-11	2.72704e-10	down	yes
Zm00001d024928	Zm00001d024928	Zm00001d024928_T014;Zm00001d024928_T008;Zm00001d024928_T024;Zm00001d024928_T006;Zm00001d024928_T011;Zm00001d024928_T023;Zm00001d024928_T004;Zm00001d024928_T003;Zm00001d024928_T009;Zm00001d024928_T016;Zm00001d024928_T021;Zm00001d024928_T002;Zm00001d024928_T001;Zm00001d024928_T013;Zm00001d024928_T022;Zm00001d024928_T005;Zm00001d024928_T007;Zm00001d024928_T017;Zm00001d024928_T015;Zm00001d024928_T010…	GO:0001510(RNA methylation);GO:0003676(nucleic acid binding);GO:0006396(RNA processing);GO:0008168(methyltransferase activity);GO:0008173(RNA methyltransferase activity);GO:0016020(membrane);GO:0016021(integral component of membrane);GO:0016740(transferase activity);GO:0032259(methylation);GO:0046872(metal ion binding);GO:0046872(metal ion binding)	NA	K15332	EC:2.1.1.-	Zinc finger CCCH domain-containing protein 24	protein_coding	0.697839	1.02884	0.809605	0.0452267	0.0240811	0.0762728	17.4219	4.12283	1.05469e-11	2.7805e-10	up	yes
Zm00001d005366	Zm00001d005366	Zm00001d005366_T001	GO:0000160(phosphorelay signal transduction system);GO:0000166(nucleotide binding);GO:0003774(motor activity);GO:0003779(actin binding);GO:0005515(protein binding);GO:0005524(ATP binding);GO:0016459(myosin complex)	NA	NA	NA	Two-component response regulator-like APRR1	protein_coding	0.0001	0.0001	0.0001	0.657876	0.641909	1.84238	9.54757e-05	-13.3545	1.07446e-11	2.82911e-10	down	yes
Zm00001d048417	Zm00001d048417	Zm00001d048417_T001	GO:0071949(FAD binding)	NA	NA	NA	FAD/NAD(P)-binding oxidoreductase family protein	protein_coding	0.087295	0.032738	0.0001	3.0996	2.0279	4.24531	0.0128172	-6.28578	1.09203e-11	2.87182e-10	down	yes
Zm00001d023907	Zm00001d023907	Zm00001d023907_T001	GO:0016020(membrane);GO:0016021(integral component of membrane)	NA	NA	NA		protein_coding	0.0001	0.0001	0.0001	1.07023	1.42284	1.64521	7.2494e-05	-13.7518	1.11602e-11	2.93129e-10	down	yes
Zm00001d005743	Zm00001d005743	Zm00001d005743_T001;Zm00001d005743_T002	GO:0016020(membrane);GO:0016021(integral component of membrane);GO:0016021(integral component of membrane)	NA	NA	NA		protein_coding	5.54844	7.7987	6.83668	1.06738	1.22904	1.23833	5.71011	2.51352	1.11804e-11	2.93296e-10	up	yes
Zm00001d003531	Zm00001d003531	Zm00001d003531_T002;Zm00001d003531_T003;Zm00001d003531_T001	GO:0003824(catalytic activity);GO:0004351(glutamate decarboxylase activity);GO:0005829(cytosol);GO:0006536(glutamate metabolic process);GO:0006538(glutamate catabolic process);GO:0016829(lyase activity);GO:0016831(carboxy-lyase activity);GO:0019752(carboxylic acid metabolic process);GO:0030170(pyridoxal phosphate binding);GO:0030170(pyridoxal phosphate binding)	00250(Alanine, aspartate and glutamate metabolism);00410(beta-Alanine metabolism);00430(Taurine and hypotaurine metabolism);00650(Butanoate metabolism);00650(Butanoate metabolism)	K01580	EC:4.1.1.15	Glutamate decarboxylase	protein_coding	0.233283	1.63276	1.6284	0.0001	0.0001	0.0001	11648.1	13.5078	1.12405e-11	2.94509e-10	up	yes
Zm00001d001649	Zm00001d001649	Zm00001d001649_T001	NA	NA	NA	NA		lincRNA	0.0001	0.0001	0.0001	1.26343	2.38963	2.56336	4.82593e-05	-14.3388	1.12671e-11	2.94842e-10	down	yes
Zm00001d019223	Zm00001d019223	Zm00001d019223_T001	NA	NA	NA	NA	Protein LURP1	protein_coding	6.6242	1.0764	2.29649	0.0001	0.0001	0.0001	33323.6	15.0243	1.14623e-11	2.99584e-10	up	yes
Zm00001d026442	Zm00001d026442	Zm00001d026442_T001;Zm00001d026442_T002	GO:0016020(membrane);GO:0016021(integral component of membrane);GO:0016021(integral component of membrane)	NA	NA	NA	EamA-like transporter family	protein_coding	1.08868	0.869107	0.76487	0.0001	0.0001	0.0001	9075.51	13.1478	1.17093e-11	3.05663e-10	up	yes
Zm00001d020015	Zm00001d020015	Zm00001d020015_T001	GO:0005739(mitochondrion)	NA	NA	NA		protein_coding	0.0001	0.0001	0.0001	0.885933	1.59067	1.2552	8.03903e-05	-13.6026	1.17926e-11	3.0746e-10	down	yes
Zm00001d035463	Zm00001d035463	Zm00001d035463_T001	NA	NA	NA	NA	NAD(P)-binding Rossmann-fold superfamily protein	protein_coding	0.0001	0.0001	0.0001	4.42139	1.82132	2.54549	3.41367e-05	-14.8383	1.19504e-11	3.11193e-10	down	yes
Zm00001d001240	Zm00001d001240	Zm00001d001240_T001	NA	NA	NA	NA		lincRNA	0.318301	0.812032	0.625438	0.0001	0.0001	0.0001	5852.57	12.5149	1.22331e-11	3.18164e-10	up	yes
Zm00001d032733	Zm00001d032733	Zm00001d032733_T002;Zm00001d032733_T003;Zm00001d032733_T001;Zm00001d032733_T004	GO:0000793(condensed chromosome);GO:0003924(GTPase activity);GO:0005525(GTP binding);GO:0005634(nucleus);GO:0006281(DNA repair);GO:0007129(synapsis);GO:0031573(intra-S DNA damage checkpoint);GO:0036297(interstrand cross-link repair);GO:0055114(oxidation-reduction process);GO:0070182(DNA polymerase binding);GO:1990918(double-strand break repair involved in meiotic recombination);GO:1990918(double-…	NA	NA	NA		protein_coding	0.257569	0.83253	0.833067	0.0001	0.0001	0.009493	198.408	7.63232	1.23859e-11	3.21747e-10	up	yes
Zm00001d025649	Zm00001d025649	Zm00001d025649_T001	GO:0005737(cytoplasm);GO:0016020(membrane);GO:0016021(integral component of membrane);GO:0120009(intermembrane lipid transfer);GO:0120013(lipid transfer activity)	NA	NA	NA	Protein DETOXIFICATION 42	protein_coding	1.22202	3.90523	2.00387	0.0001	0.0001	0.0001	23770.4	14.5369	1.28646e-11	3.33775e-10	up	yes
Zm00001d039222	Zm00001d039222	Zm00001d039222_T001	GO:0005515(protein binding);GO:0005634(nucleus);GO:0009909(regulation of flower development)	NA	NA	NA	CCT motif family protein	protein_coding	6.56957	18.7815	16.716	1.86627	1.72096	1.75186	7.87908	2.97803	1.34321e-11	3.48072e-10	up	yes
Zm00001d004282	Zm00001d004282	Zm00001d004282_T001	GO:0043531(ADP binding)	NA	NA	NA	Putative disease resistance RPP13-like protein 1	protein_coding	0.0001	0.0001	0.0001	0.451494	1.0669	0.47113	0.00015079	-12.6952	1.38421e-11	3.58261e-10	down	yes
Zm00001d005536	Zm00001d005536	Zm00001d005536_T001	GO:0016020(membrane);GO:0016021(integral component of membrane)	NA	NA	NA		protein_coding	0.0001	0.0001	0.0001	2.09868	0.999606	3.2217	4.74685e-05	-14.3627	1.39634e-11	3.6096e-10	down	yes
Zm00001d016621	Zm00001d016621	Zm00001d016621_T001	GO:0005634(nucleus);GO:0005737(cytoplasm);GO:0016787(hydrolase activity)	NA	K07766	EC:3.6.1.52	Nudix hydrolase 13	protein_coding	4.37645	5.00123	5.14138	0.188512	0.148267	0.0001	43.0987	5.42957	1.40621e-11	3.62944e-10	up	yes
Zm00001d015825	Zm00001d015825	Zm00001d015825_T001;Zm00001d015825_T004;Zm00001d015825_T005;Zm00001d015825_T003;Zm00001d015825_T002	GO:0004650(polygalacturonase activity);GO:0005576(extracellular region);GO:0005975(carbohydrate metabolic process);GO:0008152(metabolic process);GO:0009505(plant-type cell wall);GO:0016787(hydrolase activity);GO:0016798(hydrolase activity, acting on glycosyl bonds);GO:0016829(lyase activity);GO:0071555(cell wall organization);GO:0071555(cell wall organization)	NA	NA	NA	Pectin lyase-like superfamily protein	protein_coding	0.15542	0.254289	0.253744	0.0001	0.0001	0.0001	2211.51	11.1108	1.40742e-11	3.62944e-10	up	yes
Zm00001d032925	Zm00001d032925	Zm00001d032925_T001	GO:0005506(iron ion binding);GO:0005634(nucleus);GO:0005737(cytoplasm);GO:0006555(methionine metabolic process);GO:0008652(cellular amino acid biosynthetic process);GO:0009086(methionine biosynthetic process);GO:0010309(acireductone dioxygenase [iron(II)-requiring] activity);GO:0016491(oxidoreductase activity);GO:0019509(L-methionine salvage from methylthioadenosine);GO:0046872(metal ion binding)…	NA	NA	NA	12-dihydroxy-3-keto-5-methylthiopentene dioxygenase 4	protein_coding	8.12901	11.6703	11.6079	0.0001	0.434804	0.067478	62.5166	5.96617	1.42149e-11	3.66128e-10	up	yes
Zm00001d006685	Zm00001d006685	Zm00001d006685_T001	GO:0004672(protein kinase activity);GO:0005524(ATP binding);GO:0006468(protein phosphorylation)	NA	NA	NA		protein_coding	0.0001	0.0001	0.0001	2.08319	1.44051	2.78166	4.75786e-05	-14.3593	1.43327e-11	3.68716e-10	down	yes
Zm00001d021218	Zm00001d021218	Zm00001d021218_T001	GO:0044237(cellular metabolic process)	NA	NA	NA	thiamine monophosphate synthase	protein_coding	0.0001	0.0001	0.0001	0.575264	1.05565	0.603643	0.000134255	-12.8627	1.45908e-11	3.74903e-10	down	yes
Zm00001d032008	Zm00001d032008	Zm00001d032008_T001	GO:0016020(membrane);GO:0016021(integral component of membrane)	NA	NA	NA	NEP1-interacting protein-like 1	protein_coding	0.785167	2.33622	2.42664	0.0001	0.0001	0.0001	18493.4	14.1747	1.48883e-11	3.82085e-10	up	yes
Zm00001d038477	Zm00001d038477	Zm00001d038477_T001	NA	NA	NA	NA		protein_coding	0.0001	0.0001	0.0001	1.73848	3.89526	2.83243	3.54352e-05	-14.7845	1.53689e-11	3.93945e-10	down	yes
Zm00001d037153	Zm00001d037153	Zm00001d037153_T001;Zm00001d037153_T002	GO:0004190(aspartic-type endopeptidase activity);GO:0005576(extracellular region);GO:0006508(proteolysis);GO:0008233(peptidase activity);GO:0030163(protein catabolic process);GO:0030163(protein catabolic process)	NA	NA	NA	Eukaryotic aspartyl protease family protein	protein_coding	3.80165	14.9975	8.69427	0.944729	0.234307	0.336388	18.1424	4.18129	1.57002e-11	4.01951e-10	up	yes
Zm00001d039777	Zm00001d039777	Zm00001d039777_T001	GO:0004619(phosphoglycerate mutase activity);GO:0005737(cytoplasm);GO:0006007(glucose catabolic process);GO:0030145(manganese ion binding);GO:0044262(cellular carbohydrate metabolic process);GO:0046537(2,3-bisphosphoglycerate-independent phosphoglycerate mutase activity)	NA	NA	NA	Cell number regulator 8	protein_coding	0.619195	3.19529	2.23883	0.0001	0.0001	0.0001	20177.7	14.3005	1.58985e-11	4.06538e-10	up	yes
Zm00001d045139	vacuolar proton pump homolog1	Zm00001d045139_T002;Zm00001d045139_T003;Zm00001d045139_T004;Zm00001d045139_T001	GO:0004427(inorganic diphosphatase activity);GO:0009678(pyrophosphate hydrolysis-driven proton transmembrane transporter activity);GO:0016020(membrane);GO:0016021(integral component of membrane);GO:1902600(proton transmembrane transport);GO:1902600(proton transmembrane transport)	NA	NA	NA	vacuolar proton pump homolog1	protein_coding	5.06038	8.75164	8.89372	0.788639	1.71541	0.810986	6.84932	2.77596	1.5971e-11	4.07902e-10	up	yes
Zm00001d019449	Zm00001d019449	Zm00001d019449_T004;Zm00001d019449_T005;Zm00001d019449_T010;Zm00001d019449_T007;Zm00001d019449_T013;Zm00001d019449_T002;Zm00001d019449_T001;Zm00001d019449_T014;Zm00001d019449_T009;Zm00001d019449_T015;Zm00001d019449_T012;Zm00001d019449_T011;Zm00001d019449_T003	GO:0000166(nucleotide binding);GO:0003676(nucleic acid binding);GO:0003723(RNA binding);GO:0003724(RNA helicase activity);GO:0004386(helicase activity);GO:0005524(ATP binding);GO:0005730(nucleolus);GO:0006364(rRNA processing);GO:0016787(hydrolase activity);GO:0016787(hydrolase activity)	NA	K14811	EC:3.6.4.13	DEAD-box ATP-dependent RNA helicase 5	protein_coding	3.36683	3.63971	2.16131	0.291489	0.521813	0.467083	7.16023	2.84001	1.60286e-11	4.08883e-10	up	yes
Zm00001d037514	Zm00001d037514	Zm00001d037514_T001	GO:0015977(carbon fixation);GO:0016984(ribulose-bisphosphate carboxylase activity)	NA	NA	NA	Putative uncharacterized mitochondrial protein	protein_coding	15.1238	6.37655	4.963	0.0001	0.188263	0.105747	89.9778	6.4915	1.62602e-11	4.14294e-10	up	yes
Zm00001d045433	Zm00001d045433	Zm00001d045433_T001	GO:0005515(protein binding)	NA	NA	NA	SWI/SNF complex component SNF12 homolog	protein_coding	0.0001	0.0001	0.0001	1.3299	1.92837	1.53214	6.26251e-05	-13.9629	1.65874e-11	4.22126e-10	down	yes
Zm00001d043159	Zm00001d043159	Zm00001d043159_T001	GO:0001077(GO_0001077);GO:0005515(protein binding);GO:0005634(nucleus);GO:0043565(sequence-specific DNA binding);GO:0045944(positive regulation of transcription by RNA polymerase II)	NA	K21596	NA	Calmodulin-binding transcription activator 2	protein_coding	0.0001	0.340888	0.0001	12.6848	11.8321	18.0274	0.00801724	-6.96268	1.67925e-11	4.26834e-10	down	yes
Zm00001d019760	Zm00001d019760	Zm00001d019760_T001;Zm00001d019760_T002	NA	NA	NA	NA		protein_coding	0.0001	0.0001	0.0001	0.327609	0.945232	0.564027	0.000163321	-12.58	1.68358e-11	4.27425e-10	down	yes
Zm00001d034601	NAC-transcription factor 49	Zm00001d034601_T001	GO:0003677(DNA binding);GO:0005634(nucleus);GO:0006355(regulation of transcription, DNA-templated)	NA	NA	NA	NAC domain-containing protein 67%3B NAC1 transcription factor%3B SNAC1	protein_coding	20.6777	28.9892	27.2037	105.144	166.393	156.835	0.179448	-2.47836	1.7418e-11	4.41678e-10	down	yes
Zm00001d047436	Zm00001d047436	Zm00001d047436_T001	GO:0000166(nucleotide binding);GO:0005524(ATP binding);GO:0016020(membrane);GO:0016021(integral component of membrane)	NA	K08900	NA	AAA-ATPase ASD mitochondrial	protein_coding	2.9266	5.55507	9.68274	0.389453	0.15982	0.036145	31.0281	4.9555	1.79551e-11	4.54757e-10	up	yes
Zm00001d048883	Zm00001d048883	Zm00001d048883_T001	GO:0009506(plasmodesma);GO:0016020(membrane);GO:0016021(integral component of membrane);GO:0046658(anchored component of plasma membrane)	NA	NA	NA		protein_coding	0.87761	2.32899	2.06398	0.0001	0.0001	0.0001	17568.6	14.1007	1.83748e-11	4.64833e-10	up	yes
Zm00001d050935	Zm00001d050935	Zm00001d050935_T001	GO:0005746(mitochondrial respirasome);GO:0016020(membrane);GO:0016021(integral component of membrane);GO:0031305(integral component of mitochondrial inner membrane);GO:0033617(mitochondrial respiratory chain complex IV assembly);GO:0097249(GO_0097249)	NA	NA	NA	Hypoxia induced protein conserved region containing protein	protein_coding	0.0001	0.0001	0.0001	1.2292	1.58211	2.60241	5.54148e-05	-14.1394	1.8867e-11	4.76717e-10	down	yes
Zm00001d013351	Zm00001d013351	Zm00001d013351_T002;Zm00001d013351_T001	GO:0004672(protein kinase activity);GO:0004843(thiol-dependent ubiquitin-specific protease activity);GO:0005515(protein binding);GO:0005524(ATP binding);GO:0006468(protein phosphorylation);GO:0008237(metallopeptidase activity);GO:0008541(proteasome regulatory particle, lid subcomplex);GO:0016579(protein deubiquitination);GO:0043161(proteasome-mediated ubiquitin-dependent protein catabolic process…	NA	NA	NA		protein_coding	0.0001	0.0001	0.0001	1.13837	0.766064	0.600804	0.000119749	-13.0277	1.92667e-11	4.86238e-10	down	yes
Zm00001d048093	Zm00001d048093	Zm00001d048093_T001;Zm00001d048093_T002	GO:0003700(DNA-binding transcription factor activity);GO:0045893(positive regulation of transcription, DNA-templated);GO:0045893(positive regulation of transcription, DNA-templated)	NA	NA	NA		protein_coding	0.626442	0.59859	0.625963	0.0001	0.0001	0.0001	6169.98	12.5911	1.94576e-11	4.90473e-10	up	yes
Zm00001d034457	opaque2 heterodimerizing protein1	Zm00001d034457_T002;Zm00001d034457_T003;Zm00001d034457_T005;Zm00001d034457_T001;Zm00001d034457_T004	GO:0003700(DNA-binding transcription factor activity);GO:0006355(regulation of transcription, DNA-templated);GO:0006355(regulation of transcription, DNA-templated)	NA	NA	NA	Opaque2 heterodimerizing protein 1	protein_coding	3.69741	4.52718	5.12104	0.587537	0.386634	0.107034	12.3433	3.62565	1.95587e-11	4.92438e-10	up	yes
Zm00001d004948	Zm00001d004948	Zm00001d004948_T001	NA	NA	NA	NA		protein_coding	0.0001	0.0001	0.0001	0.625179	0.384559	0.544822	0.000192981	-12.3393	1.95869e-11	4.92568e-10	down	yes
Zm00001d007483	Zm00001d007483	Zm00001d007483_T001	NA	NA	NA	NA		protein_coding	0.200952	1.70207	1.04445	13.9142	14.7788	15.053	0.0673769	-3.8916	1.96457e-11	4.93461e-10	down	yes
Zm00001d043378	CPP-transcription factor 11	Zm00001d043378_T001	GO:0000977(RNA polymerase II regulatory region sequence-specific DNA binding);GO:0005634(nucleus);GO:0006355(regulation of transcription, DNA-templated)	NA	NA	NA	Protein tesmin/TSO1-like CXC 5	protein_coding	0.203924	0.409751	0.463044	3.60469	3.0737	4.13591	0.0995645	-3.32822	2.01563e-11	5.0569e-10	down	yes
Zm00001d010493	Zm00001d010493	Zm00001d010493_T001	GO:0005515(protein binding);GO:0031146(SCF-dependent proteasomal ubiquitin-dependent protein catabolic process)	NA	NA	NA	F-box domain containing protein	protein_coding	12.0528	23.4555	22.7124	2.84195	3.12175	3.6733	6.04136	2.59487	2.07412e-11	5.19752e-10	up	yes
Zm00001d018152	Zm00001d018152	Zm00001d018152_T001	GO:0031047(gene silencing by RNA)	NA	NA	NA	Protein SUPPRESSOR OF GENE SILENCING 3	protein_coding	0.0001	0.0001	0.0001	1.02572	1.59467	1.45962	7.35293e-05	-13.7313	2.09954e-11	5.25503e-10	down	yes
Zm00001d020898	Zm00001d020898	Zm00001d020898_T010;Zm00001d020898_T003;Zm00001d020898_T009;Zm00001d020898_T005;Zm00001d020898_T008;Zm00001d020898_T006;Zm00001d020898_T001;Zm00001d020898_T002;Zm00001d020898_T007;Zm00001d020898_T004	GO:0005524(ATP binding);GO:0005737(cytoplasm);GO:0005829(cytosol);GO:0005886(plasma membrane);GO:0006457(protein folding);GO:0009986(cell surface);GO:0032991(protein-containing complex);GO:0034605(cellular response to heat);GO:0048471(perinuclear region of cytoplasm);GO:0050821(protein stabilization);GO:0051082(unfolded protein binding);GO:0051082(unfolded protein binding)	04141(Protein processing in endoplasmic reticulum);04626(Plant-pathogen interaction);04626(Plant-pathogen interaction)	K04079	NA	Heat shock protein 90-2	protein_coding	0.0649264	0.377944	0.132381	4.96448	2.25152	2.56406	0.0588188	-4.08758	2.15154e-11	5.37885e-10	down	yes
Zm00001d036609	Zm00001d036609	Zm00001d036609_T019;Zm00001d036609_T011;Zm00001d036609_T007;Zm00001d036609_T012;Zm00001d036609_T001;Zm00001d036609_T028;Zm00001d036609_T020;Zm00001d036609_T003;Zm00001d036609_T004;Zm00001d036609_T024;Zm00001d036609_T017;Zm00001d036609_T021;Zm00001d036609_T015;Zm00001d036609_T023;Zm00001d036609_T025;Zm00001d036609_T010;Zm00001d036609_T018;Zm00001d036609_T013;Zm00001d036609_T027;Zm00001d036609_T026…	GO:0016491(oxidoreductase activity);GO:0016616(oxidoreductase activity, acting on the CH-OH group of donors, NAD or NADP as acceptor);GO:0055114(oxidation-reduction process);GO:0055114(oxidation-reduction process)	NA	NA	NA		protein_coding	0.0001	0.0001	0.0001	0.485554	0.398854	0.216608	0.000272476	-11.8416	2.16936e-11	5.41704e-10	down	yes
Zm00001d036575	Zm00001d036575	Zm00001d036575_T001	GO:0003723(RNA binding);GO:0003735(structural constituent of ribosome);GO:0005840(ribosome);GO:0006412(translation);GO:0016020(membrane);GO:0016021(integral component of membrane);GO:0022627(cytosolic small ribosomal subunit)	NA	NA	NA	Putative ribosomal protein S4 (RPS4A) family protein	protein_coding	0.0001	0.0001	0.0001	1.28991	1.22633	1.68349	7.14332e-05	-13.773	2.182e-11	5.4422e-10	down	yes
Zm00001d053305	Zm00001d053305	Zm00001d053305_T001	NA	NA	NA	NA	Steroid nuclear receptor ligand-binding	protein_coding	1.02757	0.987234	0.889182	0.0001	0.0001	0.0001	9679.94	13.2408	2.22096e-11	5.53289e-10	up	yes
Zm00001d050530	Zm00001d050530	Zm00001d050530_T001	NA	NA	NA	NA		protein_coding	0.0001	0.021474	0.0001	1.03003	0.866196	1.26032	0.00686638	-7.18623	2.2357e-11	5.56311e-10	down	yes
Zm00001d008514	Zm00001d008514	Zm00001d008514_T001	GO:0005515(protein binding);GO:0005634(nucleus);GO:0005737(cytoplasm);GO:0006511(ubiquitin-dependent protein catabolic process);GO:0007275(multicellular organism development);GO:0008270(zinc ion binding);GO:0016567(protein ubiquitination);GO:0016874(ligase activity);GO:0042025(host cell nucleus);GO:0046872(metal ion binding);GO:0061630(ubiquitin protein ligase activity)	04120(Ubiquitin mediated proteolysis)	K04506	EC:2.3.2.27	E3 ubiquitin-protein ligase SINA-like 10	protein_coding	0.0001	0.088881	0.11069	1.63354	6.45599	3.67498	0.0169723	-5.88067	2.24978e-11	5.59159e-10	down	yes
Zm00001d040601	Zm00001d040601	Zm00001d040601_T001	GO:0016020(membrane);GO:0016021(integral component of membrane)	NA	NA	NA		protein_coding	0.0001	0.0001	0.0001	0.395475	0.253489	0.783437	0.000209439	-12.2212	2.25553e-11	5.59935e-10	down	yes
Zm00001d018399	Zm00001d018399	Zm00001d018399_T002;Zm00001d018399_T005;Zm00001d018399_T001;Zm00001d018399_T003;Zm00001d018399_T004	GO:0005886(plasma membrane);GO:0009506(plasmodesma);GO:0016020(membrane);GO:0016021(integral component of membrane);GO:0016021(integral component of membrane)	NA	NA	NA		protein_coding	4.88751	9.37701	9.62971	1.69886	1.64559	1.06027	5.42468	2.43954	2.33128e-11	5.78064e-10	up	yes
Zm00001d015017	Zm00001d015017	Zm00001d015017_T001	NA	NA	NA	NA		protein_coding	4.76113	4.18226	3.82825	0.0001	0.0001	0.0001	42572.1	15.3776	2.33969e-11	5.79475e-10	up	yes
Zm00001d001857	Zm00001d001857	Zm00001d001857_T001;Zm00001d001857_T002	GO:0009416(response to light stimulus);GO:0009507(chloroplast);GO:0009522(photosystem I);GO:0009523(photosystem II);GO:0009535(chloroplast thylakoid membrane);GO:0009536(plastid);GO:0009579(thylakoid);GO:0009765(photosynthesis, light harvesting);GO:0009768(photosynthesis, light harvesting in photosystem I);GO:0009941(chloroplast envelope);GO:0010287(plastoglobule);GO:0015979(photosynthesis);GO:00…	00196(Photosynthesis - antenna proteins);00196(Photosynthesis - antenna proteins)	K08917	NA	light harvesting complex photosystem II subunit 6	protein_coding	18.0535	21.9741	23.5318	538.812	509.432	69.3093	0.0568737	-4.13609	2.46178e-11	6.09005e-10	down	yes
Zm00001d027380	Zm00001d027380	Zm00001d027380_T001;Zm00001d027380_T003;Zm00001d027380_T002	GO:0004070(aspartate carbamoyltransferase activity);GO:0004585(ornithine carbamoyltransferase activity);GO:0006207('de novo' pyrimidine nucleobase biosynthetic process);GO:0006520(cellular amino acid metabolic process);GO:0016597(amino acid binding);GO:0016740(transferase activity);GO:0016743(carboxyl- or carbamoyltransferase activity);GO:0019240(citrulline biosynthetic process);GO:0042450(argini…	NA	NA	NA	Ornithine carbamoyltransferase chloroplastic	protein_coding	0.0001	0.0001	0.0001	0.956053	0.364375	0.642839	0.000152807	-12.676	2.47385e-11	6.11278e-10	down	yes
Zm00001d021685	Zm00001d021685	Zm00001d021685_T007;Zm00001d021685_T016;Zm00001d021685_T023;Zm00001d021685_T001;Zm00001d021685_T019;Zm00001d021685_T013;Zm00001d021685_T004;Zm00001d021685_T014;Zm00001d021685_T028;Zm00001d021685_T020;Zm00001d021685_T012;Zm00001d021685_T025;Zm00001d021685_T005;Zm00001d021685_T022;Zm00001d021685_T029;Zm00001d021685_T006;Zm00001d021685_T024	GO:0003779(actin binding);GO:0005737(cytoplasm);GO:0007010(cytoskeleton organization);GO:0008154(actin polymerization or depolymerization);GO:0015629(actin cytoskeleton);GO:0051014(actin filament severing);GO:0051015(actin filament binding);GO:0051017(actin filament bundle assembly);GO:0051017(actin filament bundle assembly)	NA	NA	NA	Villin-4	protein_coding	0.222542	0.232338	0.348798	0.0001	0.0001	0.0001	2678.92	11.3874	2.51769e-11	6.2139e-10	up	yes
Zm00001d020563	Zm00001d020563	Zm00001d020563_T001	GO:0004930(G protein-coupled receptor activity);GO:0004970(ionotropic glutamate receptor activity);GO:0005886(plasma membrane);GO:0006811(ion transport);GO:0007186(G protein-coupled receptor signaling pathway);GO:0015276(ligand-gated ion channel activity);GO:0016020(membrane);GO:0016021(integral component of membrane);GO:0034220(ion transmembrane transport);GO:0038023(signaling receptor activity)	NA	NA	NA	Glutamate receptor 2.7	protein_coding	0.292621	0.491955	0.337469	0.0001	0.0001	0.0001	3740.15	11.8689	2.56698e-11	6.32822e-10	up	yes
Zm00001d030936	Zm00001d030936	Zm00001d030936_T001	GO:0005622(intracellular);GO:0008270(zinc ion binding)	NA	NA	NA		protein_coding	0.0001	0.0001	0.0001	1.40226	1.79962	0.824432	7.45099e-05	-13.7122	2.6112e-11	6.42978e-10	down	yes
Zm00001d036513	Zm00001d036513	Zm00001d036513_T001	GO:0005777(peroxisome);GO:0006598(polyamine catabolic process);GO:0016491(oxidoreductase activity);GO:0046592(polyamine oxidase activity);GO:0055114(oxidation-reduction process)	NA	NA	NA		protein_coding	0.0001	0.0001	0.0001	0.800485	0.609197	1.03233	0.000122849	-12.9908	2.62302e-11	6.45141e-10	down	yes
Zm00001d017076	Zm00001d017076	Zm00001d017076_T001	NA	NA	NA	NA		protein_coding	1.0117	2.04515	0.790337	0.0001	0.0001	0.0001	12824	13.6466	2.68846e-11	6.60472e-10	up	yes
Zm00001d012159	Zm00001d012159	Zm00001d012159_T005;Zm00001d012159_T004;Zm00001d012159_T006;Zm00001d012159_T001;Zm00001d012159_T002;Zm00001d012159_T003	GO:0004553(hydrolase activity, hydrolyzing O-glycosyl compounds);GO:0005975(carbohydrate metabolic process);GO:0008152(metabolic process);GO:0008422(beta-glucosidase activity);GO:0016787(hydrolase activity);GO:0016798(hydrolase activity, acting on glycosyl bonds);GO:0030245(cellulose catabolic process);GO:0102483(scopolin beta-glucosidase activity);GO:0102483(scopolin beta-glucosidase activity)	NA	NA	NA	Beta-glucosidase 42	protein_coding	2.17991	3.67231	5.00338	0.257381	0.0276872	0.104083	27.8956	4.80196	2.75767e-11	6.76694e-10	up	yes
Zm00001d031430	Zm00001d031430	Zm00001d031430_T004;Zm00001d031430_T006;Zm00001d031430_T005;Zm00001d031430_T007;Zm00001d031430_T003;Zm00001d031430_T002;Zm00001d031430_T001	GO:0006999(nuclear pore organization);GO:0017056(structural constituent of nuclear pore);GO:0044611(nuclear pore inner ring);GO:0044611(nuclear pore inner ring)	NA	NA	NA		protein_coding	3.53371	13.9626	10.152	1.2454	1.30298	1.3252	7.13767	2.83545	2.78852e-11	6.83476e-10	up	yes
Zm00001d012979	Alfin-like-transcription factor 17	Zm00001d012979_T022;Zm00001d012979_T035;Zm00001d012979_T024;Zm00001d012979_T011;Zm00001d012979_T020;Zm00001d012979_T032;Zm00001d012979_T017;Zm00001d012979_T002;Zm00001d012979_T003;Zm00001d012979_T004;Zm00001d012979_T005;Zm00001d012979_T015;Zm00001d012979_T021;Zm00001d012979_T019;Zm00001d012979_T013;Zm00001d012979_T027;Zm00001d012979_T008;Zm00001d012979_T018;Zm00001d012979_T034;Zm00001d012979_T014…	GO:0005515(protein binding);GO:0006355(regulation of transcription, DNA-templated);GO:0016020(membrane);GO:0016021(integral component of membrane);GO:0042393(histone binding);GO:0046872(metal ion binding);GO:0046872(metal ion binding)	NA	NA	NA	Pentatricopeptide repeat-containing protein mitochondrial	protein_coding	0.469381	0.706803	0.533004	2.84913	2.15838	3.23721	0.207307	-2.27016	2.86476e-11	7.01356e-10	down	yes
Zm00001d026665	Zm00001d026665	Zm00001d026665_T001	NA	NA	NA	NA		protein_coding	2.46545	4.55317	3.60166	19.4402	21.0475	18.4592	0.180167	-2.47259	2.91919e-11	7.13858e-10	down	yes
Zm00001d001261	Zm00001d001261	Zm00001d001261_T001	NA	NA	NA	NA		lincRNA	5.47557	5.5335	4.10278	0.0001	0.0001	0.0001	50372.8	15.6204	2.92675e-11	7.14886e-10	up	yes
Zm00001d045718	Zm00001d045718	Zm00001d045718_T001	NA	NA	NA	NA	Phosphatidylinositol/phosphatidylcholine transfer protein SFH13	protein_coding	0.0001	0.0001	0.0001	1.23182	1.39108	1.47286	7.32465e-05	-13.7369	3.01492e-11	7.35577e-10	down	yes
Zm00001d047453	Zm00001d047453	Zm00001d047453_T005;Zm00001d047453_T009;Zm00001d047453_T004;Zm00001d047453_T012;Zm00001d047453_T007;Zm00001d047453_T006;Zm00001d047453_T008;Zm00001d047453_T001;Zm00001d047453_T013;Zm00001d047453_T016;Zm00001d047453_T003;Zm00001d047453_T010;Zm00001d047453_T011;Zm00001d047453_T015;Zm00001d047453_T002	GO:0003779(actin binding);GO:0005737(cytoplasm);GO:0007010(cytoskeleton organization);GO:0008154(actin polymerization or depolymerization);GO:0015629(actin cytoskeleton);GO:0051014(actin filament severing);GO:0051015(actin filament binding);GO:0051017(actin filament bundle assembly);GO:0051017(actin filament bundle assembly)	NA	NA	NA	Villin-2	protein_coding	0.357437	0.626605	0.578703	2.92494	2.71227	3.30612	0.174738	-2.51673	3.05671e-11	7.4492e-10	down	yes
Zm00001d005700	Zm00001d005700	Zm00001d005700_T001	GO:0003735(structural constituent of ribosome);GO:0005840(ribosome);GO:0006412(translation)	NA	NA	NA	60S ribosomal protein L23	protein_coding	0.0001	0.0001	0.0001	1.754	2.39329	1.3977	5.41029e-05	-14.1739	3.08662e-11	7.51347e-10	down	yes
Zm00001d036390	Zm00001d036390	Zm00001d036390_T001	GO:0008168(methyltransferase activity)	NA	NA	NA	CMV 1a interacting protein 1	protein_coding	1.76439	2.46482	2.93376	0.077951	0.0001	0.0001	91.6556	6.51815	3.15078e-11	7.66091e-10	up	yes
Zm00001d048909	Zm00001d048909	Zm00001d048909_T001	NA	NA	NA	NA		protein_coding	2.92115	1.52022	4.28173	0.0001	0.0001	0.0001	29077	14.8276	3.20493e-11	7.78366e-10	up	yes
Zm00001d023106	Zm00001d023106	Zm00001d023106_T001	NA	NA	NA	NA		lincRNA	1.16329	2.52701	1.73501	0.0001	0.0001	0.0001	18084.4	14.1425	3.25431e-11	7.89459e-10	up	yes
Zm00001d037112	Zm00001d037112	Zm00001d037112_T001	GO:0004672(protein kinase activity);GO:0005524(ATP binding);GO:0006468(protein phosphorylation);GO:0016301(kinase activity);GO:0016310(phosphorylation)	NA	NA	NA	root-specific kinase 1	protein_coding	4.10347	8.54087	8.18024	0.663612	1.0293	0.355483	10.1663	3.34572	3.26078e-11	7.90126e-10	up	yes
Zm00001d003660	Zm00001d003660	Zm00001d003660_T001	GO:0006473(protein acetylation);GO:0016410(N-acyltransferase activity);GO:0016740(transferase activity)	NA	NA	NA	Acetyltransferase	protein_coding	1.1574	3.95911	3.53776	23.6587	20.3207	17.5915	0.140558	-2.83077	3.33866e-11	8.08078e-10	down	yes
Zm00001d010278	Zm00001d010278	Zm00001d010278_T001	GO:0005840(ribosome);GO:0006364(rRNA processing);GO:0043022(ribosome binding)	NA	NA	NA	16S rRNA processing protein RimM family	protein_coding	1.75584	2.15506	2.42752	0.0001	0.057599	0.0001	109.663	6.77694	3.55899e-11	8.60427e-10	up	yes
Zm00001d008001	Zm00001d008001	Zm00001d008001_T001	NA	NA	NA	NA		lincRNA	0.184917	0.416771	0.345099	0.0001	0.0001	0.0001	3155.96	11.6239	3.62577e-11	8.75577e-10	up	yes
Zm00001d049008	Zm00001d049008	Zm00001d049008_T001;Zm00001d049008_T002	GO:0000166(nucleotide binding);GO:0005524(ATP binding);GO:0016787(hydrolase activity);GO:0016787(hydrolase activity)	00230(Purine metabolism);00240(Pyrimidine metabolism);00240(Pyrimidine metabolism)	K14641	EC:3.6.1.5	Apyrase 1	protein_coding	0.796455	1.51689	1.82908	0.035982	0.0001	0.0001	114.489	6.83906	3.67309e-11	8.85999e-10	up	yes
Zm00001d021047	Zm00001d021047	Zm00001d021047_T001	GO:0016740(transferase activity)	NA	NA	NA	Nucleotide-diphospho-sugar transferase family protein	protein_coding	0.866916	13.5318	28.5916	0.159063	0.0001	0.053031	202.599	7.66248	3.75914e-11	9.05727e-10	up	yes
Zm00001d005672	Zm00001d005672	Zm00001d005672_T001;Zm00001d005672_T002;Zm00001d005672_T003	GO:0016020(membrane);GO:0016021(integral component of membrane);GO:0016021(integral component of membrane)	NA	NA	NA		protein_coding	0.0001	0.0001	0.0001	0.273979	0.292598	0.235571	0.000373996	-11.3847	3.8204e-11	9.19445e-10	down	yes
Zm00001d036293	Caffeoyl-CoA O-methyltransferase1	Zm00001d036293_T001;Zm00001d036293_T003;Zm00001d036293_T005;Zm00001d036293_T002;Zm00001d036293_T004	GO:0008168(methyltransferase activity);GO:0008171(O-methyltransferase activity);GO:0008757(S-adenosylmethionine-dependent methyltransferase activity);GO:0009699(phenylpropanoid biosynthetic process);GO:0009809(lignin biosynthetic process);GO:0016740(transferase activity);GO:0032259(methylation);GO:0042409(caffeoyl-CoA O-methyltransferase activity);GO:0046872(metal ion binding);GO:0046872(metal io…	00360(Phenylalanine metabolism);00940(Phenylpropanoid biosynthesis);00941(Flavonoid biosynthesis);00945(Stilbenoid, diarylheptanoid and gingerol biosynthesis);00945(Stilbenoid, diarylheptanoid and gingerol biosynthesis)	K00588	EC:2.1.1.104	Caffeoyl-CoA O-methyltransferase1	protein_coding	57.9496	134.575	108.708	15.8744	19.2773	7.9893	6.98251	2.80375	3.90745e-11	9.39333e-10	up	yes
Zm00001d016532	Zm00001d016532	Zm00001d016532_T001	NA	NA	NA	NA		protein_coding	0.0001	0.0001	0.0001	3.43902	1.40855	1.80903	4.5068e-05	-14.4375	3.9326e-11	9.44313e-10	down	yes
Zm00001d020128	Zm00001d020128	Zm00001d020128_T001	NA	NA	NA	NA	BTB/POZ domain-containing protein	protein_coding	0.0001	0.0001	0.0001	1.25447	1.02561	1.10625	8.85914e-05	-13.4625	3.96666e-11	9.51418e-10	down	yes
Zm00001d033424	Zm00001d033424	Zm00001d033424_T001	GO:0005886(plasma membrane);GO:0006813(potassium ion transport);GO:0015079(potassium ion transmembrane transporter activity);GO:0016020(membrane);GO:0016021(integral component of membrane);GO:0071805(potassium ion transmembrane transport)	NA	NA	NA	Potassium transporter 10	protein_coding	0.0001	0.0001	0.0001	2.10316	0.75965	0.957207	7.85337e-05	-13.6363	4.01113e-11	9.61e-10	down	yes
Zm00001d037038	Zm00001d037038	Zm00001d037038_T002;Zm00001d037038_T003;Zm00001d037038_T001	NA	NA	NA	NA		protein_coding	0.0001	0.0001	0.0001	0.540894	0.803205	0.522468	0.000160723	-12.6031	4.07183e-11	9.74444e-10	down	yes
Zm00001d037944	Zm00001d037944	Zm00001d037944_T001	NA	NA	NA	NA		protein_coding	0.0001	0.0001	0.0001	2.12652	0.780872	0.993589	7.69036e-05	-13.6666	4.07745e-11	9.74694e-10	down	yes
Zm00001d016085	Zm00001d016085	Zm00001d016085_T001	GO:0016020(membrane);GO:0016021(integral component of membrane)	NA	NA	NA		protein_coding	10.1239	6.18133	8.55648	0.242259	0.0001	0.0001	102.54	6.68004	4.14493e-11	9.89713e-10	up	yes
Zm00001d017451	Zm00001d017451	Zm00001d017451_T001;Zm00001d017451_T002	NA	NA	NA	NA		protein_coding	0.0001	0.0001	0.0001	1.1067	1.22245	0.193967	0.000118901	-13.038	4.17103e-11	9.94827e-10	down	yes
Zm00001d021067	Zm00001d021067	Zm00001d021067_T001	GO:0005515(protein binding);GO:0005622(intracellular);GO:0006886(intracellular protein transport);GO:0016192(vesicle-mediated transport)	NA	NA	NA	Clathrin heavy chain 2	protein_coding	0.0001	0.0001	0.0001	0.916986	0.662599	0.73308	0.00012972	-12.9123	4.18967e-11	9.98156e-10	down	yes
Zm00001d002351	terpene synthase1	Zm00001d002351_T001;Zm00001d002351_T002	GO:0000287(magnesium ion binding);GO:0005737(cytoplasm);GO:0006715(farnesol biosynthetic process);GO:0006952(defense response);GO:0009507(chloroplast);GO:0009536(plastid);GO:0009723(response to ethylene);GO:0009753(response to jasmonic acid);GO:0009899(ent-kaurene synthase activity);GO:0010333(terpene synthase activity);GO:0016102(diterpenoid biosynthetic process);GO:0016106(sesquiterpenoid biosy…	00900(Terpenoid backbone biosynthesis);00909(Sesquiterpenoid and triterpenoid biosynthesis);00909(Sesquiterpenoid and triterpenoid biosynthesis)	K15793	3.1.7.6;4.2.3.47;EC:4.2.3.49	terpene synthase1	protein_coding	12.135	101.044	74.7153	4.81953	1.07328	2.30922	22.9083	4.5178	4.20736e-11	1.00063e-09	up	yes
Zm00001d047274	Zm00001d047274	Zm00001d047274_T001	GO:0016020(membrane);GO:0016021(integral component of membrane)	NA	NA	NA	Expressed protein; protein	protein_coding	0.522408	2.30656	2.21979	0.0001	0.02981	0.0001	168.236	7.39434	4.20947e-11	1.00063e-09	up	yes
Zm00001d024231	Zm00001d024231	Zm00001d024231_T001	GO:0003824(catalytic activity);GO:0016491(oxidoreductase activity);GO:0016616(oxidoreductase activity, acting on the CH-OH group of donors, NAD or NADP as acceptor);GO:0050662(coenzyme binding);GO:0055114(oxidation-reduction process)	NA	NA	NA	NAD(P)-binding Rossmann-fold superfamily protein	protein_coding	4.90449	15.5747	12.4921	1.47837	0.973384	1.34169	8.69165	3.11963	4.3427e-11	1.03115e-09	up	yes
Zm00001d039579	PHD-transcription factor 34	Zm00001d039579_T001	GO:0046872(metal ion binding)	NA	NA	NA	RING/FYVE/PHD zinc finger superfamily protein	protein_coding	0.0001	0.0001	0.0001	0.566576	0.47418	0.524179	0.000191701	-12.3489	4.35048e-11	1.03184e-09	down	yes
Zm00001d001267	Zm00001d001267	Zm00001d001267_T001	NA	NA	NA	NA		lincRNA	0.0001	0.0001	0.0001	0.373723	0.419348	0.64949	0.000207963	-12.2314	4.39507e-11	1.04126e-09	down	yes
Zm00001d030841	Zm00001d030841	Zm00001d030841_T001	NA	NA	NA	NA		protein_coding	0.728329	0.805082	0.726671	0.0001	0.0001	0.0001	7533.61	12.8791	4.48662e-11	1.06177e-09	up	yes
Zm00001d023342	Zm00001d023342	Zm00001d023342_T002;Zm00001d023342_T001	GO:0016020(membrane);GO:0016021(integral component of membrane);GO:0022857(transmembrane transporter activity);GO:0055085(transmembrane transport);GO:0055085(transmembrane transport)	NA	NA	NA	Probable peptide/nitrate transporter	protein_coding	3.26228	5.23191	4.03151	0.184346	0.487917	0.357322	12.1658	3.60476	4.52426e-11	1.06949e-09	up	yes
Zm00001d043519	Zm00001d043519	Zm00001d043519_T001;Zm00001d043519_T007;Zm00001d043519_T006;Zm00001d043519_T005;Zm00001d043519_T004;Zm00001d043519_T003;Zm00001d043519_T002	GO:0004180(carboxypeptidase activity);GO:0006508(proteolysis);GO:0016020(membrane);GO:0016021(integral component of membrane);GO:0016021(integral component of membrane)	NA	K01301	EC:3.4.17.21	Peptidase M28 family protein	protein_coding	0.324276	1.00223	0.572974	3.7493	3.37262	3.54283	0.178108	-2.48917	4.53465e-11	1.06978e-09	down	yes
Zm00001d042867	bowman-birk inhibitor1	Zm00001d042867_T001	GO:0004867(serine-type endopeptidase inhibitor activity);GO:0005576(extracellular region);GO:0010466(negative regulation of peptidase activity);GO:0010951(negative regulation of endopeptidase activity);GO:0030414(peptidase inhibitor activity)	NA	NA	NA	bowman-birk inhibitor1	protein_coding	237.684	925.857	535.635	92.0297	38.6998	59.6058	8.92728	3.15822	4.53558e-11	1.06978e-09	up	yes
Zm00001d016312	Zm00001d016312	Zm00001d016312_T001	GO:0006351(transcription, DNA-templated);GO:0043565(sequence-specific DNA binding)	NA	NA	NA	Transcription factor TGA4	protein_coding	0.0001	0.0001	0.0001	3.88149	3.05062	4.2775	2.67628e-05	-15.1894	4.54568e-11	1.07098e-09	down	yes
Zm00001d049059	alcohol dehydrogenase2	Zm00001d049059_T001	GO:0004022(alcohol dehydrogenase (NAD+) activity);GO:0004024(alcohol dehydrogenase activity, zinc-dependent);GO:0005737(cytoplasm);GO:0005829(cytosol);GO:0008270(zinc ion binding);GO:0016491(oxidoreductase activity);GO:0046294(formaldehyde catabolic process);GO:0046872(metal ion binding);GO:0051903(S-(hydroxymethyl)glutathione dehydrogenase activity);GO:0055114(oxidation-reduction process)	NA	NA	NA	alcohol dehydrogenase2	protein_coding	8.09819	40.0343	24.7747	1.99276	0.224163	0.442548	27.4141	4.77685	4.61432e-11	1.08595e-09	up	yes
Zm00001d017382	LIM-transcription factor 9	Zm00001d017382_T002;Zm00001d017382_T003;Zm00001d017382_T001	GO:0005886(plasma membrane);GO:0015629(actin cytoskeleton);GO:0046872(metal ion binding);GO:0051015(actin filament binding);GO:0051017(actin filament bundle assembly);GO:0051017(actin filament bundle assembly)	NA	NA	NA	LIM domain-containing protein PLIM2b	protein_coding	0.0001	0.0001	0.0001	1.24278	0.490585	0.742568	0.000121166	-13.0107	4.83121e-11	1.13573e-09	down	yes
Zm00001d006443	Zm00001d006443	Zm00001d006443_T002;Zm00001d006443_T001;Zm00001d006443_T003;Zm00001d006443_T004	GO:0000725(recombinational repair);GO:0003677(DNA binding);GO:0003678(DNA helicase activity);GO:0004003(GO_0004003);GO:0005524(ATP binding);GO:0005634(nucleus);GO:0006281(DNA repair);GO:0006310(DNA recombination);GO:0016787(hydrolase activity);GO:0032508(DNA duplex unwinding);GO:0036292(DNA rewinding);GO:0043138(3'-5' DNA helicase activity);GO:0043140(GO_0043140);GO:0043140(GO_0043140)	NA	NA	NA	P-loop containing nucleoside triphosphate hydrolases superfamily protein	protein_coding	0.0001	0.0740928	0.0595301	1.37691	1.56151	1.4642	0.0303735	-5.04104	4.94393e-11	1.16095e-09	down	yes
Zm00001d015935	Zm00001d015935	Zm00001d015935_T001	NA	NA	NA	NA		protein_coding	0.0001	0.0001	0.0001	4.59735	2.71381	1.92683	3.24746e-05	-14.9103	4.95372e-11	1.16157e-09	down	yes
Zm00001d034231	Zm00001d034231	Zm00001d034231_T001	GO:0005515(protein binding);GO:0005975(carbohydrate metabolic process);GO:0009045(xylose isomerase activity);GO:0016853(isomerase activity);GO:0042732(D-xylose metabolic process);GO:0046872(metal ion binding)	NA	NA	NA	Xylose isomerase	protein_coding	0.418	1.32996	0.991413	0.0001	0.0001	0.0001	9131.25	13.1566	4.95748e-11	1.16157e-09	up	yes
Zm00001d025441	Zm00001d025441	Zm00001d025441_T001	GO:0003735(structural constituent of ribosome);GO:0005840(ribosome);GO:0006412(translation)	NA	NA	NA	60S ribosomal protein L23	protein_coding	0.0001	0.0001	0.0001	2.18203	3.45011	1.03984	4.49642e-05	-14.4409	5.04086e-11	1.17981e-09	down	yes
Zm00001d013735	Zm00001d013735	Zm00001d013735_T002;Zm00001d013735_T001	GO:0016020(membrane);GO:0016021(integral component of membrane);GO:0016298(lipase activity);GO:0016298(lipase activity)	NA	NA	NA		protein_coding	0.0001	0.0001	0.0001	0.648013	0.791158	0.766596	0.000136007	-12.844	5.05953e-11	1.18287e-09	down	yes
Zm00001d031241	Zm00001d031241	Zm00001d031241_T001;Zm00001d031241_T005;Zm00001d031241_T004;Zm00001d031241_T008;Zm00001d031241_T003;Zm00001d031241_T007;Zm00001d031241_T009;Zm00001d031241_T002;Zm00001d031241_T006	GO:0000166(nucleotide binding);GO:0003676(nucleic acid binding);GO:0004813(alanine-tRNA ligase activity);GO:0004843(thiol-dependent ubiquitin-specific protease activity);GO:0005524(ATP binding);GO:0005737(cytoplasm);GO:0005829(cytosol);GO:0006419(alanyl-tRNA aminoacylation);GO:0006508(proteolysis);GO:0016807(cysteine-type carboxypeptidase activity);GO:0016874(ligase activity);GO:0071108(protein K…	NA	NA	NA	Alanine--tRNA ligase	protein_coding	0.0001	0.0001	0.0001	0.0868942	0.307583	0.476514	0.000344435	-11.5035	5.11554e-11	1.19465e-09	down	yes
Zm00001d003495	Zm00001d003495	Zm00001d003495_T006;Zm00001d003495_T001;Zm00001d003495_T002;Zm00001d003495_T005;Zm00001d003495_T007;Zm00001d003495_T009;Zm00001d003495_T011;Zm00001d003495_T003;Zm00001d003495_T012;Zm00001d003495_T010;Zm00001d003495_T008	NA	NA	NA	NA		protein_coding	0.617291	0.687663	0.569675	2.83596	2.89576	4.59493	0.181533	-2.46169	5.15916e-11	1.20352e-09	down	yes
Zm00001d025205	bHLH-transcription factor 100	Zm00001d025205_T001	GO:0003677(DNA binding);GO:0046983(protein dimerization activity)	NA	NA	NA	Putative HLH DNA-binding domain superfamily protein	protein_coding	0.483185	1.09989	0.653204	0.0001	0.0001	0.0001	7454.27	12.8639	5.26446e-11	1.22674e-09	up	yes
Zm00001d023443	Zm00001d023443	Zm00001d023443_T001	GO:0003700(DNA-binding transcription factor activity);GO:0005634(nucleus);GO:0006355(regulation of transcription, DNA-templated);GO:0043565(sequence-specific DNA binding)	NA	NA	NA	Basic-leucine zipper (bZIP) transcription factor family protein	protein_coding	2.32654	1.56354	2.12748	0.0001	0.0001	0.0001	20058.5	14.2919	5.29072e-11	1.23151e-09	up	yes
Zm00001d044185	Zm00001d044185	Zm00001d044185_T006;Zm00001d044185_T003;Zm00001d044185_T005;Zm00001d044185_T001;Zm00001d044185_T002;Zm00001d044185_T004	GO:0004672(protein kinase activity);GO:0004683(calmodulin-dependent protein kinase activity);GO:0005509(calcium ion binding);GO:0005516(calmodulin binding);GO:0005524(ATP binding);GO:0005634(nucleus);GO:0005737(cytoplasm);GO:0006468(protein phosphorylation);GO:0009738(abscisic acid-activated signaling pathway);GO:0009931(calcium-dependent protein serine/threonine kinase activity);GO:0016301(kinas…	04626(Plant-pathogen interaction);04626(Plant-pathogen interaction)	K13412	EC:2.7.11.1	Calcium-dependent protein kinase 3	protein_coding	3.52898	4.09538	3.67547	0.771948	0.539107	0.556	6.05222	2.59747	5.37535e-11	1.24984e-09	up	yes
Zm00001d009275	Zm00001d009275	Zm00001d009275_T001	NA	NA	NA	NA		protein_coding	0.0001	0.0001	0.0001	0.935731	0.83149	0.909197	0.00011209	-13.1231	5.57256e-11	1.29428e-09	down	yes
Zm00001d048730	Zm00001d048730	Zm00001d048730_T001	GO:0016787(hydrolase activity)	NA	NA	NA	Cellulase (glycosyl hydrolase family 5) protein	protein_coding	0.0001	0.0001	0.0001	0.378017	0.686545	1.09767	0.000138745	-12.8153	5.6509e-11	1.31104e-09	down	yes
Zm00001d026238	Zm00001d026238	Zm00001d026238_T001;Zm00001d026238_T002	GO:0006855(drug transmembrane transport);GO:0015238(GO_0015238);GO:0015297(antiporter activity);GO:0016020(membrane);GO:0016021(integral component of membrane);GO:0022857(transmembrane transporter activity);GO:0042908(xenobiotic transport);GO:0042910(xenobiotic transmembrane transporter activity);GO:0055085(transmembrane transport);GO:0055085(transmembrane transport)	NA	K03327	NA	Protein TRANSPARENT TESTA 12	protein_coding	0.0672383	0.686967	0.639552	0.0001	0.0001	0.0001	4645.86	12.1817	5.72153e-11	1.32599e-09	up	yes
Zm00001d034327	Zm00001d034327	Zm00001d034327_T001	GO:0016020(membrane);GO:0016021(integral component of membrane)	NA	NA	NA		protein_coding	0.0001	0.0001	0.0001	2.41572	1.92039	1.05503	5.5647e-05	-14.1333	5.79806e-11	1.34226e-09	down	yes
Zm00001d023651	Zm00001d023651	Zm00001d023651_T001	GO:0003824(catalytic activity);GO:0016787(hydrolase activity)	NA	NA	NA	soluble epoxide hydrolase	protein_coding	0.045413	0.112089	0.232748	2.66748	5.09713	2.44495	0.038224	-4.70938	6.07943e-11	1.40587e-09	down	yes
Zm00001d019245	Zm00001d019245	Zm00001d019245_T001	NA	NA	NA	NA	Remorin family protein	protein_coding	0.0001	0.0001	0.0001	1.82407	0.995309	4.36205	4.17744e-05	-14.547	6.10014e-11	1.40913e-09	down	yes
Zm00001d031734	Zm00001d031734	Zm00001d031734_T001;Zm00001d031734_T002	GO:0016787(hydrolase activity);GO:0016788(hydrolase activity, acting on ester bonds);GO:0016788(hydrolase activity, acting on ester bonds)	NA	NA	NA	GDSL-like lipase/acylhydrolase	protein_coding	13.2793	8.81544	12.3396	0.500388	1.217	1.71763	10.0245	3.32546	6.16627e-11	1.42286e-09	up	yes
Zm00001d020742	Zm00001d020742	Zm00001d020742_T001	GO:0009056(catabolic process);GO:0016787(hydrolase activity)	NA	NA	NA	Probable carboxylesterase 2	protein_coding	2.7872	0.844955	1.67704	0.0001	0.0001	0.0001	17697.3	14.1112	6.21208e-11	1.43187e-09	up	yes
Zm00001d023710	Zm00001d023710	Zm00001d023710_T004;Zm00001d023710_T002;Zm00001d023710_T003;Zm00001d023710_T001;Zm00001d023710_T005	GO:0003676(nucleic acid binding);GO:0004527(exonuclease activity);GO:0005634(nucleus);GO:0090305(nucleic acid phosphodiester bond hydrolysis);GO:0090305(nucleic acid phosphodiester bond hydrolysis)	03008(Ribosome biogenesis in eukaryotes);03008(Ribosome biogenesis in eukaryotes)	K14570	EC:3.1.-.-	Small RNA degrading nuclease 5	protein_coding	0.232618	0.512143	0.308489	0.0001	0.0001	0.0001	3510.83	11.7776	6.26427e-11	1.44234e-09	up	yes
Zm00001d032873	umc2181	Zm00001d032873_T001;Zm00001d032873_T002	GO:0030001(metal ion transport);GO:0046872(metal ion binding);GO:0046872(metal ion binding)	NA	NA	NA	Metal ion binding protein	protein_coding	10.1317	22.8953	16.9141	86.4505	69.3154	90.6588	0.202663	-2.30285	6.53831e-11	1.50381e-09	down	yes
Zm00001d006122	Zm00001d006122	Zm00001d006122_T001	NA	NA	NA	NA		protein_coding	0.0001	0.605476	0.857797	14.3589	17.3513	16.9444	0.0300767	-5.05521	6.71605e-11	1.54302e-09	down	yes
Zm00001d006193	Zm00001d006193	Zm00001d006193_T001	GO:0004497(monooxygenase activity);GO:0005506(iron ion binding);GO:0016020(membrane);GO:0016021(integral component of membrane);GO:0016491(oxidoreductase activity);GO:0016705(oxidoreductase activity, acting on paired donors, with incorporation or reduction of molecular oxygen);GO:0016709(oxidoreductase activity, acting on paired donors, with incorporation or reduction of molecular oxygen, NAD(P)H…	NA	NA	NA	cytochrome P450 family 78 subfamily A polypeptide 8	protein_coding	15.6557	43.3052	49.0373	2.26435	0.672031	3.99249	15.5867	3.96224	6.94385e-11	1.59364e-09	up	yes
Zm00001d008855	succinate dehydrogenase3	Zm00001d008855_T001	GO:0000104(succinate dehydrogenase activity);GO:0005749(mitochondrial respiratory chain complex II, succinate dehydrogenase complex (ubiquinone));GO:0006099(tricarboxylic acid cycle);GO:0006121(mitochondrial electron transport, succinate to ubiquinone);GO:0008177(succinate dehydrogenase (ubiquinone) activity);GO:0009055(electron transfer activity);GO:0009061(anaerobic respiration);GO:0016491(oxid…	NA	NA	NA	succinate dehydrogenase3	protein_coding	0.0001	0.0001	0.0001	1.38396	1.16649	1.20329	7.99203e-05	-13.6111	7.47642e-11	1.71402e-09	down	yes
Zm00001d010969	Zm00001d010969	Zm00001d010969_T001	GO:0005886(plasma membrane);GO:0009506(plasmodesma);GO:0016020(membrane);GO:0016021(integral component of membrane)	NA	NA	NA	Tetraspanin-6	protein_coding	1.62447	4.786	4.66382	0.218038	0.225354	0.121326	19.6103	4.29354	7.51745e-11	1.72157e-09	up	yes
Zm00001d022000	Zm00001d022000	Zm00001d022000_T006;Zm00001d022000_T029;Zm00001d022000_T007;Zm00001d022000_T001;Zm00001d022000_T015;Zm00001d022000_T025;Zm00001d022000_T008;Zm00001d022000_T035;Zm00001d022000_T012;Zm00001d022000_T050;Zm00001d022000_T031;Zm00001d022000_T003;Zm00001d022000_T019;Zm00001d022000_T004;Zm00001d022000_T059;Zm00001d022000_T043;Zm00001d022000_T033;Zm00001d022000_T052;Zm00001d022000_T016;Zm00001d022000_T023…	GO:0004721(phosphoprotein phosphatase activity);GO:0005634(nucleus);GO:0005737(cytoplasm);GO:0006406(mRNA export from nucleus);GO:0006470(protein dephosphorylation);GO:0016020(membrane);GO:0016021(integral component of membrane);GO:0016787(hydrolase activity);GO:0046872(metal ion binding);GO:0070390(transcription export complex 2);GO:0070390(transcription export complex 2)	NA	NA	NA		protein_coding	0.0001	0.0001	0.0001	0.12625	0.0803958	0.0985159	0.000983085	-9.9904	7.86273e-11	1.79871e-09	down	yes
Zm00001d010826	Zm00001d010826	Zm00001d010826_T001	GO:0003723(RNA binding);GO:0003729(mRNA binding);GO:0005737(cytoplasm);GO:0061157(mRNA destabilization)	NA	NA	NA	evolutionarily conserved C-terminal region 7	protein_coding	0.0001	0.0001	0.0001	0.602394	0.90703	0.950719	0.000121944	-13.0015	8.07546e-11	1.84538e-09	down	yes
Zm00001d013663	Zm00001d013663	Zm00001d013663_T001	GO:0005634(nucleus);GO:0007275(multicellular organism development);GO:0010158(abaxial cell fate specification);GO:0045165(cell fate commitment)	NA	NA	NA	Putative axial regulator YABBY 2	protein_coding	0.0001	0.0001	0.0001	0.937378	0.92264	0.957776	0.000106466	-13.1973	8.09488e-11	1.84784e-09	down	yes
ENSRNA049472213	snoR134	ENSRNA049472213-T1	NA	NA	NA	NA	small nucleolar RNA snoR134	snoRNA	9.55455	6.1868	7.61218	0.0001	0.0001	0.0001	77845.1	16.2483	8.64041e-11	1.97025e-09	up	yes
Zm00001d007153	Zm00001d007153	Zm00001d007153_T001;Zm00001d007153_T002	GO:0005746(mitochondrial respirasome);GO:0016020(membrane);GO:0016021(integral component of membrane);GO:0031305(integral component of mitochondrial inner membrane);GO:0033617(mitochondrial respiratory chain complex IV assembly);GO:0097249(GO_0097249);GO:0097249(GO_0097249)	NA	NA	NA	Hypoxia-responsive family protein	protein_coding	10.6574	20.0249	20.2346	3.2503	1.5597	1.96643	7.51382	2.90955	8.75682e-11	1.99466e-09	up	yes
Zm00001d044686	phospholipid transfer protein homolog2	Zm00001d044686_T001	GO:0006869(lipid transport);GO:0008289(lipid binding);GO:0016020(membrane)	NA	NA	NA	Non-specific lipid-transfer protein	protein_coding	396.258	1639.84	1427.93	110.29	72.2246	17.1486	17.3494	4.11681	9.43768e-11	2.14603e-09	up	yes
Zm00001d035986	Zm00001d035986	Zm00001d035986_T001;Zm00001d035986_T002	GO:0005737(cytoplasm);GO:0031931(TORC1 complex);GO:0031932(TORC2 complex);GO:0032006(regulation of TOR signaling);GO:0070209(ASTRA complex);GO:0070209(ASTRA complex)	NA	NA	NA	ARM repeat superfamily protein	protein_coding	0.0001	0.0001	0.0001	2.51319	2.56618	0.110906	5.78004e-05	-14.0786	9.44151e-11	2.14603e-09	down	yes
Zm00001d016172	Zm00001d016172	Zm00001d016172_T001	GO:0000724(double-strand break repair via homologous recombination);GO:0004386(helicase activity);GO:0005634(nucleus);GO:0005694(chromosome);GO:0005737(cytoplasm);GO:0006268(DNA unwinding involved in DNA replication);GO:0006281(DNA repair);GO:0006310(DNA recombination);GO:0009378(four-way junction helicase activity);GO:0032508(DNA duplex unwinding);GO:0043138(3'-5' DNA helicase activity)	NA	NA	NA	DNA helicase	protein_coding	0.0001	0.0001	0.0001	1.09118	2.99845	1.46407	5.40181e-05	-14.1762	9.63255e-11	2.18711e-09	down	yes
Zm00001d020781	Zm00001d020781	Zm00001d020781_T001;Zm00001d020781_T003;Zm00001d020781_T004;Zm00001d020781_T002	GO:0005215(transporter activity);GO:0015211(purine nucleoside transmembrane transporter activity);GO:0015860(purine nucleoside transmembrane transport);GO:0016020(membrane);GO:0016021(integral component of membrane);GO:0016021(integral component of membrane)	NA	NA	NA	Purine permease 3	protein_coding	0.202741	0.227515	0.0558416	3.8849	4.80273	1.74089	0.0466123	-4.42315	9.77366e-11	2.21679e-09	down	yes
Zm00001d026231	zea floricaula/leafy1	Zm00001d026231_T001	GO:0003677(DNA binding);GO:0005634(nucleus);GO:0006355(regulation of transcription, DNA-templated)	NA	NA	NA	Zea floricaula/leafy1	protein_coding	0.0001	0.0001	0.0001	0.478377	0.8992	0.929533	0.000130033	-12.9088	9.90817e-11	2.2449e-09	down	yes
Zm00001d010617	WRKY-transcription factor 44	Zm00001d010617_T001	GO:0003677(DNA binding);GO:0003700(DNA-binding transcription factor activity);GO:0005634(nucleus);GO:0006355(regulation of transcription, DNA-templated);GO:0043565(sequence-specific DNA binding)	NA	NA	NA	Putative WRKY DNA-binding domain superfamily protein	protein_coding	0.210202	3.25494	3.3622	0.0001	0.0001	0.0001	22757.8	14.4741	1.0104e-10	2.28685e-09	up	yes
Zm00001d024744	Zm00001d024744	Zm00001d024744_T008;Zm00001d024744_T012;Zm00001d024744_T005;Zm00001d024744_T009;Zm00001d024744_T002;Zm00001d024744_T007;Zm00001d024744_T004;Zm00001d024744_T010;Zm00001d024744_T006;Zm00001d024744_T001;Zm00001d024744_T013;Zm00001d024744_T011;Zm00001d024744_T003	GO:0000166(nucleotide binding);GO:0004672(protein kinase activity);GO:0004674(protein serine/threonine kinase activity);GO:0004713(protein tyrosine kinase activity);GO:0005524(ATP binding);GO:0005886(plasma membrane);GO:0006468(protein phosphorylation);GO:0007166(cell surface receptor signaling pathway);GO:0016301(kinase activity);GO:0016310(phosphorylation);GO:0016740(transferase activity);GO:00…	NA	NA	NA	PTI1-like tyrosine-protein kinase 3	protein_coding	0.17817	1.38118	0.932082	0.0001	0.0136095	0.0001	180.415	7.49517	1.02895e-10	2.32635e-09	up	yes
Zm00001d031951	Zm00001d031951	Zm00001d031951_T007;Zm00001d031951_T008;Zm00001d031951_T005;Zm00001d031951_T002;Zm00001d031951_T001;Zm00001d031951_T003;Zm00001d031951_T006;Zm00001d031951_T004;Zm00001d031951_T009	GO:0005515(protein binding);GO:0005623(cell);GO:0009055(electron transfer activity);GO:0009507(chloroplast);GO:0015035(protein disulfide oxidoreductase activity);GO:0016020(membrane);GO:0016021(integral component of membrane);GO:0016740(transferase activity);GO:0022900(electron transport chain);GO:0045454(cell redox homeostasis);GO:0055114(oxidation-reduction process);GO:0055114(oxidation-reducti…	NA	NA	NA	Thioredoxin family protein	protein_coding	2.80095	1.86793	3.45742	13.1513	19.1107	17.4748	0.163386	-2.61364	1.03528e-10	2.33818e-09	down	yes
Zm00001d038526	Zm00001d038526	Zm00001d038526_T001;Zm00001d038526_T002	NA	NA	NA	NA		protein_coding	0.0958042	0.0001	0.483524	9.13722	10.0089	8.74056	0.020778	-5.5888	1.0395e-10	2.34522e-09	down	yes
Zm00001d012910	Zm00001d012910	Zm00001d012910_T001	GO:0030001(metal ion transport);GO:0046872(metal ion binding)	NA	NA	NA		protein_coding	1.05416	2.40566	3.19457	0.0001	0.0001	0.0001	22181.3	14.4371	1.04066e-10	2.34534e-09	up	yes
Zm00001d014263	Zm00001d014263	Zm00001d014263_T001	GO:0000103(sulfate assimilation);GO:0004020(adenylylsulfate kinase activity);GO:0004781(sulfate adenylyltransferase (ATP) activity)	NA	NA	NA	ATP sulfurylase 1 chloroplastic	protein_coding	1.09936	5.3773	5.0708	0.041654	0.175167	0.037734	45.3633	5.50345	1.06051e-10	2.38754e-09	up	yes
Zm00001d048947	pathogenesis-related protein3	Zm00001d048947_T001	GO:0042742(defense response to bacterium);GO:0050832(defense response to fungus)	NA	NA	NA	pathogenesis-related protein3	protein_coding	0.022329	0.0001	0.0001	3.24234	2.09303	1.86596	0.00312845	-8.32034	1.07182e-10	2.41045e-09	down	yes
Zm00001d003474	Zm00001d003474	Zm00001d003474_T001	GO:0005515(protein binding);GO:0019013(viral nucleocapsid)	NA	NA	NA	Heterogeneous nuclear ribonucleoprotein U-like protein 1	protein_coding	0.309295	0.718332	0.910487	0.0001	0.0001	0.0001	6460.38	12.6574	1.073e-10	2.41058e-09	up	yes
Zm00001d005337	Zm00001d005337	Zm00001d005337_T001	GO:0003824(catalytic activity);GO:0005829(cytosol);GO:0006152(purine nucleoside catabolic process);GO:0008270(zinc ion binding);GO:0016787(hydrolase activity);GO:0047974(guanosine deaminase activity)	NA	NA	NA	Cytidine/deoxycytidylate deaminase family protein	protein_coding	0.0001	0.0001	0.0001	1.56913	0.994076	1.2713	7.82369e-05	-13.6418	1.07531e-10	2.41151e-09	down	yes
Zm00001d027071	Zm00001d027071	Zm00001d027071_T001	NA	NA	NA	NA		lincRNA	0.07589	0.065822	0.180699	3.98125	3.49449	4.23429	0.0275329	-5.1827	1.07569e-10	2.41151e-09	down	yes
Zm00001d048738	Zm00001d048738	Zm00001d048738_T001	GO:0001510(RNA methylation);GO:0008171(O-methyltransferase activity);GO:0008173(RNA methyltransferase activity);GO:0016491(oxidoreductase activity);GO:0017069(snRNA binding);GO:0040031(snRNA modification);GO:0055114(oxidation-reduction process)	NA	NA	NA	Aldehyde dehydrogenase family 7 member A1	protein_coding	0.0001	0.0001	0.0001	3.36159	3.20688	1.09318	3.91561e-05	-14.6404	1.07916e-10	2.41676e-09	down	yes
Zm00001d017536	Zm00001d017536	Zm00001d017536_T001	GO:0005215(transporter activity);GO:0016020(membrane);GO:0016021(integral component of membrane);GO:0022857(transmembrane transporter activity);GO:0055085(transmembrane transport)	NA	NA	NA	Major facilitator superfamily protein	protein_coding	0.0001	0.0001	0.047984	1.60625	1.09886	2.3603	0.00951236	-6.71598	1.08637e-10	2.43034e-09	down	yes
Zm00001d010619	Zm00001d010619	Zm00001d010619_T002;Zm00001d010619_T003;Zm00001d010619_T004;Zm00001d010619_T001	GO:0003677(DNA binding);GO:0005634(nucleus);GO:0006310(DNA recombination);GO:0032196(transposition);GO:0046983(protein dimerization activity);GO:0046983(protein dimerization activity)	NA	NA	NA	Zinc finger BED domain-containing protein DAYSLEEPER	protein_coding	0.0001	0.0001	0.0001	1.92448	0.126966	2.10195	7.22301e-05	-13.757	1.09298e-10	2.44255e-09	down	yes
Zm00001d053725	Zm00001d053725	Zm00001d053725_T002;Zm00001d053725_T001;Zm00001d053725_T003	GO:0000166(nucleotide binding);GO:0004672(protein kinase activity);GO:0004674(protein serine/threonine kinase activity);GO:0004675(transmembrane receptor protein serine/threonine kinase activity);GO:0005524(ATP binding);GO:0005886(plasma membrane);GO:0006468(protein phosphorylation);GO:0007178(transmembrane receptor protein serine/threonine kinase signaling pathway);GO:0016301(kinase activity);GO…	NA	NA	NA	Protein kinase superfamily protein	protein_coding	5.85667	21.983	18.603	2.46689	2.46957	1.4121	7.31547	2.87095	1.10614e-10	2.46937e-09	up	yes
Zm00001d037757	Zm00001d037757	Zm00001d037757_T001	GO:0005623(cell);GO:0009055(electron transfer activity);GO:0015035(protein disulfide oxidoreductase activity);GO:0022900(electron transport chain);GO:0045454(cell redox homeostasis);GO:0055114(oxidation-reduction process)	NA	NA	NA	Grx_C15-glutaredoxin subgroup III	protein_coding	78.8484	162.601	190.243	31.967	26.138	24.0655	5.25362	2.39331	1.15626e-10	2.57855e-09	up	yes
Zm00001d041962	Zm00001d041962	Zm00001d041962_T002;Zm00001d041962_T001	GO:0004367(glycerol-3-phosphate dehydrogenase [NAD+] activity);GO:0005829(cytosol);GO:0005975(carbohydrate metabolic process);GO:0006072(glycerol-3-phosphate metabolic process);GO:0006116(NADH oxidation);GO:0009331(glycerol-3-phosphate dehydrogenase complex);GO:0016491(oxidoreductase activity);GO:0016616(oxidoreductase activity, acting on the CH-OH group of donors, NAD or NADP as acceptor);GO:004…	00564(Glycerophospholipid metabolism);00564(Glycerophospholipid metabolism)	K00006	EC:1.1.1.8	Glycerol-3-phosphate dehydrogenase [NAD(+)] 1 chloroplastic	protein_coding	1.28141	1.85228	1.99148	8.09705	9.47587	9.90866	0.186495	-2.42279	1.19672e-10	2.66599e-09	down	yes
Zm00001d025509	Zm00001d025509	Zm00001d025509_T001	NA	NA	K06995	NA	RmlC-like cupins superfamily protein	protein_coding	1605.86	1491.4	1823.71	272.975	327.752	323.389	5.32505	2.4128	1.20837e-10	2.68913e-09	up	yes
Zm00001d046571	Zm00001d046571	Zm00001d046571_T002;Zm00001d046571_T004;Zm00001d046571_T001;Zm00001d046571_T003	GO:0003677(DNA binding);GO:0046983(protein dimerization activity);GO:0046983(protein dimerization activity)	NA	NA	NA	Putative HLH DNA-binding domain superfamily protein	protein_coding	0.561637	0.448319	0.347599	0.0001	0.0001	0.0001	4525.18	12.1438	1.21477e-10	2.69884e-09	up	yes
Zm00001d032932	Zm00001d032932	Zm00001d032932_T001	GO:0005515(protein binding)	NA	NA	NA	IQ-domain 19	protein_coding	0.108984	0.0001	0.0001	4.65955	5.4566	2.57962	0.00860003	-6.86144	1.21527e-10	2.69884e-09	down	yes
Zm00001d034166	Zm00001d034166	Zm00001d034166_T018;Zm00001d034166_T030;Zm00001d034166_T010;Zm00001d034166_T003;Zm00001d034166_T019;Zm00001d034166_T022;Zm00001d034166_T008;Zm00001d034166_T025;Zm00001d034166_T002;Zm00001d034166_T007;Zm00001d034166_T021;Zm00001d034166_T027;Zm00001d034166_T011;Zm00001d034166_T020;Zm00001d034166_T024;Zm00001d034166_T015;Zm00001d034166_T005;Zm00001d034166_T028;Zm00001d034166_T026;Zm00001d034166_T013…	GO:0000166(nucleotide binding);GO:0000226(microtubule cytoskeleton organization);GO:0000278(mitotic cell cycle);GO:0000780(condensed nuclear chromosome, centromeric region);GO:0004672(protein kinase activity);GO:0004674(protein serine/threonine kinase activity);GO:0005524(ATP binding);GO:0005876(spindle microtubule);GO:0006468(protein phosphorylation);GO:0007052(mitotic spindle organization);GO:0…	NA	K08850	EC:2.7.11.1	Serine/threonine-protein kinase Aurora-3	protein_coding	0.715588	1.16021	0.52509	0.0677819	0.077045	0.0716804	11.0892	3.47108	1.24063e-10	2.75229e-09	up	yes
Zm00001d022454	Zm00001d022454	Zm00001d022454_T002;Zm00001d022454_T001;Zm00001d022454_T003;Zm00001d022454_T004	GO:0005515(protein binding);GO:0005515(protein binding)	NA	NA	NA	F-box family protein	protein_coding	4.22349	3.17225	3.57051	0.580647	0.565698	0.248116	7.86415	2.97529	1.24729e-10	2.76254e-09	up	yes
Zm00001d042594	Zm00001d042594	Zm00001d042594_T001	GO:0016491(oxidoreductase activity);GO:0016616(oxidoreductase activity, acting on the CH-OH group of donors, NAD or NADP as acceptor);GO:0055114(oxidation-reduction process)	NA	NA	NA	Anthocyanidin reductase	protein_coding	0.0001	0.0001	0.0001	1.89706	1.25921	0.818541	7.54752e-05	-13.6936	1.24785e-10	2.76254e-09	down	yes
Zm00001d025476	Zm00001d025476	Zm00001d025476_T001	GO:0016020(membrane);GO:0016021(integral component of membrane)	NA	NA	NA	P0041A24.7 protein	protein_coding	0.208369	1.76519	1.56664	0.0001	0.0001	0.0001	11800.7	13.5266	1.26391e-10	2.79519e-09	up	yes
Zm00001d040695	Zm00001d040695	Zm00001d040695_T004;Zm00001d040695_T006;Zm00001d040695_T001;Zm00001d040695_T005;Zm00001d040695_T007;Zm00001d040695_T003;Zm00001d040695_T002	GO:0000166(nucleotide binding);GO:0004672(protein kinase activity);GO:0004674(protein serine/threonine kinase activity);GO:0004675(transmembrane receptor protein serine/threonine kinase activity);GO:0005524(ATP binding);GO:0005886(plasma membrane);GO:0006468(protein phosphorylation);GO:0007178(transmembrane receptor protein serine/threonine kinase signaling pathway);GO:0016020(membrane);GO:001602…	04626(Plant-pathogen interaction);04626(Plant-pathogen interaction)	K13436	EC:2.7.11.1	PTI1-like tyrosine-protein kinase 3	protein_coding	0.219571	0.342056	0.706898	0.0001	0.0001	0.0001	4228.42	12.0459	1.33341e-10	2.94583e-09	up	yes
Zm00001d046834	Zm00001d046834	Zm00001d046834_T001	GO:0016020(membrane);GO:0016021(integral component of membrane)	NA	NA	NA	Low temperature and salt responsive protein	protein_coding	2.03458	53.9424	100.521	0.897607	0.676745	0.918664	62.7747	5.97211	1.35931e-10	2.99993e-09	up	yes
Zm00001d031743	Zm00001d031743	Zm00001d031743_T001	GO:0003723(RNA binding);GO:0003735(structural constituent of ribosome);GO:0005840(ribosome);GO:0006412(translation);GO:0016020(membrane);GO:0016021(integral component of membrane);GO:0016740(transferase activity);GO:0016779(nucleotidyltransferase activity);GO:0022627(cytosolic small ribosomal subunit)	NA	NA	NA	40S ribosomal protein S4-3	protein_coding	0.0001	0.0001	0.0001	1.20444	0.822801	1.64997	8.15836e-05	-13.5814	1.39613e-10	3.07799e-09	down	yes
Zm00001d039710	Zm00001d039710	Zm00001d039710_T001;Zm00001d039710_T004;Zm00001d039710_T003;Zm00001d039710_T005;Zm00001d039710_T002	GO:0005623(cell);GO:0006662(glycerol ether metabolic process);GO:0015035(protein disulfide oxidoreductase activity);GO:0045454(cell redox homeostasis);GO:0045454(cell redox homeostasis)	NA	K03671	NA	Thioredoxin H-type	protein_coding	13.9763	20.8716	20.1041	3.91355	3.46475	2.54177	5.53947	2.46975	1.40405e-10	3.09226e-09	up	yes
Zm00001d020707	Zm00001d020707	Zm00001d020707_T001	GO:0009056(catabolic process);GO:0016787(hydrolase activity)	NA	NA	NA	Probable carboxylesterase 2	protein_coding	16.818	19.5286	23.2419	4.64152	2.43839	2.82458	6.01631	2.58888	1.41106e-10	3.10448e-09	up	yes
Zm00001d049804	Zm00001d049804	Zm00001d049804_T001	GO:0003824(catalytic activity);GO:0005975(carbohydrate metabolic process);GO:0016020(membrane);GO:0016021(integral component of membrane);GO:0016857(racemase and epimerase activity, acting on carbohydrates and derivatives);GO:0050662(coenzyme binding)	NA	NA	NA	NAD-dependent epimerase/dehydratase family protein	protein_coding	1.22985	3.1141	2.70568	0.070167	0.0001	0.0001	100.184	6.6465	1.44444e-10	3.17463e-09	up	yes
Zm00001d044855	Zm00001d044855	Zm00001d044855_T001	GO:0005737(cytoplasm);GO:0031931(TORC1 complex);GO:0031932(TORC2 complex);GO:0032006(regulation of TOR signaling);GO:0070209(ASTRA complex)	NA	NA	NA	ARM repeat superfamily protein	protein_coding	0.0001	0.0001	0.0001	0.487319	0.297003	0.566579	0.000222074	-12.1367	1.44627e-10	3.17537e-09	down	yes
Zm00001d014493	Zm00001d014493	Zm00001d014493_T001	NA	NA	NA	NA	Wound-responsive family protein	protein_coding	0.213118	0.221412	0.495811	10.2223	7.51867	14.9456	0.0284624	-5.1348	1.45523e-10	3.19175e-09	down	yes
Zm00001d029712	Zm00001d029712	Zm00001d029712_T001	NA	NA	NA	NA		protein_coding	0.0001	0.0001	0.0001	0.736579	0.674343	0.509931	0.000156181	-12.6445	1.45867e-10	3.19601e-09	down	yes
Zm00001d008162	Zm00001d008162	Zm00001d008162_T001	NA	NA	NA	NA		lincRNA	0.860399	2.03506	2.33311	0.0001	0.0001	0.0001	17428.6	14.0892	1.49285e-10	3.26754e-09	up	yes
Zm00001d014503	Zm00001d014503	Zm00001d014503_T001	GO:0005783(endoplasmic reticulum)	NA	NA	NA		protein_coding	1.80211	1.44356	1.01207	0.0001	0.0001	0.0001	14192.5	13.7928	1.49724e-10	3.27377e-09	up	yes
Zm00001d029460	Zm00001d029460	Zm00001d029460_T001	GO:0016036(cellular response to phosphate starvation);GO:0070417(cellular response to cold)	NA	NA	NA	Ids4-like protein	protein_coding	8.17969	48.9263	89.8657	0.851489	3.26877	0.871569	29.4424	4.87983	1.50259e-10	3.2821e-09	up	yes
ENSRNA049476719	snoZ112	ENSRNA049476719-T1	NA	NA	NA	NA	Small nucleolar RNA Z112	snoRNA	0.0001	0.0001	0.0001	6.06739	4.56349	5.60912	1.84729e-05	-15.7242	1.51739e-10	3.31103e-09	down	yes
Zm00001d031248	Zm00001d031248	Zm00001d031248_T001	NA	NA	NA	NA		protein_coding	2.62039	2.46865	2.84798	0.098699	0.0001	0.0487	53.8107	5.74982	1.5344e-10	3.34471e-09	up	yes
Zm00001d026379	Zm00001d026379	Zm00001d026379_T001;Zm00001d026379_T002	GO:0001228(DNA-binding transcription activator activity, RNA polymerase II-specific);GO:0005634(nucleus);GO:0045944(positive regulation of transcription by RNA polymerase II);GO:0046983(protein dimerization activity);GO:0046983(protein dimerization activity)	NA	NA	NA	Transcription factor bHLH112	protein_coding	0.180167	1.21473	0.643951	0.0001	0.0001	0.0001	6796.17	12.7305	1.54322e-10	3.36049e-09	up	yes
Zm00001d017019	Zm00001d017019	Zm00001d017019_T001	NA	NA	NA	NA	ATFP4	protein_coding	17.5126	30.0839	24.4212	5.85609	2.46927	2.51185	6.64541	2.73236	1.55034e-10	3.37255e-09	up	yes
Zm00001d013133	Zm00001d013133	Zm00001d013133_T001	NA	NA	NA	NA	Verprolin	protein_coding	38.9876	10.9813	18.9686	239.789	289.7	287.525	0.0843774	-3.567	1.57799e-10	3.42918e-09	down	yes
Zm00001d015394	PLATZ-transcription factor 8	Zm00001d015394_T001	GO:0005622(intracellular);GO:0008270(zinc ion binding)	NA	NA	NA	PLATZ transcription factor family protein	protein_coding	0.562577	0.533352	0.565074	0.0001	0.0001	0.0001	5536.68	12.4348	1.59605e-10	3.46489e-09	up	yes
Zm00001d024652	Zm00001d024652	Zm00001d024652_T001	NA	NA	NA	NA		protein_coding	0.0001	0.0001	0.0001	1.29008	1.10932	0.743618	9.54497e-05	-13.3549	1.709e-10	3.70632e-09	down	yes
Zm00001d039855	Zm00001d039855	Zm00001d039855_T001	NA	NA	NA	NA	Heme oxygenase 1 chloroplastic	protein_coding	2.40842	2.01495	3.97701	0.071427	0.0001	0.0001	117.279	6.87381	1.71405e-10	3.71349e-09	up	yes
Zm00001d006880	Zm00001d006880	Zm00001d006880_T001	GO:0004462(lactoylglutathione lyase activity);GO:0005737(cytoplasm);GO:0019243(methylglyoxal catabolic process to D-lactate via S-lactoyl-glutathione)	NA	NA	NA	glyoxalase I homolog	protein_coding	0.714287	0.747051	0.571015	0.0001	0.0001	0.0001	6774.51	12.7259	1.7322e-10	3.74899e-09	up	yes
[truncated: 4,277 more rows]

## Sheet: ST3_vs_SS3
Differentially expressed genes in SS3 vs. ST3 comparison.
gene_id	gene_name	transcript_id	GO	KEGG	KO_ENTRY	EC	Description	trans_type	FPKM.ST3_1	FPKM.ST3_2	FPKM.ST3_3	FPKM.SS3_1	FPKM.SS3_2	FPKM.SS3_3	fc	log2(fc)	pval	qval	regulation	significant
Zm00001d002392	Zm00001d002392	Zm00001d002392_T001	NA	NA	NA	NA		protein_coding	0.0001	0.0001	0.0001	34.9787	48.9207	55.3736	2.15404e-06	-18.8245	8.12158e-108	1.78902e-103	down	yes
[truncated: 6,038 more rows]

## Sheet: ST7_vs_SS7
Differentially expressed genes in SS7 vs. ST7 comparison.
[truncated: 6,636 more rows]
