# Supplementary material for: Maize leaves salt-responsive genes revealed by comparative transcriptome of salt-tolerant and salt-sensitive cultivars during the seedling stage
Source: PeerJ. 2025 Apr 10;13:e19268. doi: 10.7717/peerj.19268 (PMC11994069; doi:10.7717/peerj.19268)
Supplement: Supplemental Information 4 [file peerj-13-19268-s004.xlsx]

## Sheet: sheet1
Table S3. The specific expression levels and details of DEGs.
gene_id	chr	start	end	strand	gene_name	transcript_id	GO	KEGG	KO_ENTRY	EC	Description	trans_type	FPKM.SS0_1	FPKM.SS0_2	FPKM.SS0_3	FPKM.SS3_1	FPKM.SS3_2	FPKM.SS3_3	FPKM.SS7_1	FPKM.SS7_2	FPKM.SS7_3	FPKM.ST0_1	FPKM.ST0_2	FPKM.ST0_3	FPKM.ST3_1	FPKM.ST3_2	FPKM.ST3_3	FPKM.ST7_1	FPKM.ST7_2	FPKM.ST7_3	count.SS0_1	count.SS0_2	count.SS0_3	count.SS3_1	count.SS3_2	count.SS3_3	count.SS7_1	count.SS7_2	count.SS7_3	count.ST0_1	count.ST0_2	count.ST0_3	count.ST3_1	count.ST3_2	count.ST3_3	count.ST7_1	count.ST7_2	count.ST7_3
ZemaCp032	Pt	56874	58304	+	rbcL	ZemaCp032	GO:0000287(magnesium ion binding);GO:0004497(monooxygenase activity);GO:0009507(chloroplast);GO:0009536(plastid);GO:0009853(photorespiration);GO:0015977(carbon fixation);GO:0015979(photosynthesis);GO:0016491(oxidoreductase activity);GO:0016829(lyase activity);GO:0016984(ribulose-bisphosphate carboxylase activity);GO:0019253(reductive pentose-phosphate cycle);GO:0046872(metal ion binding);GO:00551…	00630(Glyoxylate and dicarboxylate metabolism);00710(Carbon fixation in photosynthetic organisms)	K01601	EC:4.1.1.39	rbcL	protein_coding	3.88059	15.5224	3.0319	18.9575	2.54374	2.89177	3.19965	42.0352	1.90537	4607.33	897.717	1468.66	16.8857	66.5382	20.2727	168.635	40.7491	5.35234	319	1302	256	1279	166	246	260	4093	174	372823	97196	150351	1631	4460	2120	17455	3507	549
Zm00001d000556	chr3	81249153	81251042	-	Zm00001d000556	Zm00001d000556_T001	NA	NA	NA	NA		lincRNA	1.24676	1.08158	1.49124	14.9748	27.0054	54.6052	15.419	7.90603	20.6474	0.622785	1.78352	1.44232	12.6197	10.2285	9.48763	0.164935	0.061587	0.747673	136	120	167	1334	2317	6120	1651	1017	2487	67	256	196	1610	906	1311	23	8	102
Zm00001d000719	chr3	226596848	226597856	+	Zm00001d000719	Zm00001d000719_T001	NA	NA	NA	NA		lincRNA	0.125391	0.042642	0.21136	5.10845	5.83265	9.33875	9.38814	2.06424	14.6385	0.014992	0.551637	0.315844	23.7067	5.54037	12.9045	0.20914	0.115141	0.296142	8	3	13	243	268	559	537	142	942	1	43	23	1614	262	952	16	7	22
Zm00001d000986	chr2	184488715	184489018	+	Zm00001d000986	Zm00001d000986_T001	NA	NA	NA	NA		lincRNA	7.95979	3.4901	6.69535	0.241068	0.259994	0.0001	3.48503	2.03994	0.826537	9.11216	110.272	118.944	3.81973	2.06324	13.1399	131.965	291.197	93.5489	139	63	120	4	4	0	61	43	17	157	2537	2587	79	30	292	2902	5324	2036
Zm00001d001192	chr7	102996443	102997073	+	Zm00001d001192	Zm00001d001192_T001	NA	NA	NA	NA		lincRNA	0.189608	0.156911	0.180133	0.207782	0.16039	0.136772	0.16528	0.170162	0.102443	66.5154	150.616	120.724	0.110936	23.4608	61.4524	183.113	215.498	0.228998	7	6	7	7	5	6	6	8	5	2374	7191	5450	5	694	2834	8358	8178	11
Zm00001d001425	chr6	127847646	127849162	+	Zm00001d001425	Zm00001d001425_T001	NA	NA	NA	NA		lincRNA	3.08081	5.86538	4.10511	1.11791	1.8996	1.30929	1.7801	3.8414	1.81669	19.707	23.5083	19.7861	10.9058	3.79143	9.7389	7.99693	7.24531	13.8555	78	151	107	24	38	35	45	115	51	490	781	622	324	78	313	254	192	436
Zm00001d001688	chr5	176195318	176195624	+	Zm00001d001688	Zm00001d001688_T001	NA	NA	NA	NA		lincRNA	2.97353	2.09849	2.58211	17.1863	23.5632	32.4134	3.76226	6.25983	4.0814	6.13219	7.12367	9.21049	100.975	42.6011	47.2166	7.50528	5.92054	24.5522	53	38	47	249	329	591	66	131	80	107	166	203	2092	613	1060	167	110	540
Zm00001d001858	chr2	2031382	2034507	+	Zm00001d001858	Zm00001d001858_T001	NA	NA	NA	NA	BTB/POZ domain-containing protein	protein_coding	0.5786	0.580385	0.391123	0.887213	0.845984	0.580594	0.435875	0.357289	0.30868	1.12002	1.02556	2.0199	10.419	4.1011	4.31904	2.15027	3.3222	22.1978	70	72	49	88	81	73	52	51	42	133	163	303	1473	403	662	326	419	3329
Zm00001d001865	chr2	2078887	2079669	-	cytokinin response regulator1	Zm00001d001865_T001	GO:0000156(phosphorelay response regulator activity);GO:0000160(phosphorelay signal transduction system);GO:0005515(protein binding);GO:0005622(intracellular);GO:0005829(cytosol);GO:0006995(cellular response to nitrogen starvation);GO:0009735(response to cytokinin);GO:0009736(cytokinin-activated signaling pathway);GO:0010167(response to nitrate);GO:0060359(response to ammonium ion)	04075(Plant hormone signal transduction)	K14492	NA	cytokinin response regulator1	protein_coding	4.15898	5.26337	6.41792	0.152498	0.052535	0.079266	0.170147	3.54976	0.60333	17.6981	19.0234	16.3433	1.66473	1.00104	8.32427	8.01839	6.33679	8.36419	187	242	297	6	2	4	8	190	31	784	1127	916	88	37	477	455	299	469
Zm00001d001882	chr2	2322242	2329784	-	Zm00001d001882	Zm00001d001882_T001;Zm00001d001882_T002;Zm00001d001882_T003;Zm00001d001882_T004;Zm00001d001882_T005;Zm00001d001882_T006;Zm00001d001882_T010;Zm00001d001882_T011;Zm00001d001882_T012;Zm00001d001882_T013	GO:0005786(signal recognition particle, endoplasmic reticulum targeting);GO:0006614(SRP-dependent cotranslational protein targeting to membrane);GO:0006616(SRP-dependent cotranslational protein targeting to membrane, translocation);GO:0006617(SRP-dependent cotranslational protein targeting to membrane, signal sequence recognition);GO:0008312(7S RNA binding);GO:0016020(membrane);GO:0016021(integra…	03060(Protein export);03060(Protein export)	K03105	NA	Signal recognition particle 19 kDa protein	protein_coding	3.50949	4.48467	3.24245	3.35496	4.1823	5.91238	3.54752	4.43898	3.75144	7.66358	8.61672	10.4982	21.2304	20.2678	25.9173	9.36721	9.71964	28.9861	987	1287	937	775	929	1716	987	1478	1171	2122	3191	3677	7010	4644	9267	3316	2861	10154
Zm00001d001939	chr2	3192067	3195814	+	Zm00001d001939	Zm00001d001939_T001;Zm00001d001939_T002;Zm00001d001939_T003;Zm00001d001939_T004;Zm00001d001939_T005	GO:0000166(nucleotide binding);GO:0003924(GTPase activity);GO:0005525(GTP binding);GO:0005737(cytoplasm);GO:0005874(microtubule);GO:0007017(microtubule-based process);GO:0009507(chloroplast);GO:0010020(chloroplast fission);GO:0032153(cell division site);GO:0048285(organelle fission);GO:0051301(cell division);GO:0051301(cell division)	NA	NA	NA	Cell division protein FtsZ homolog 1 chloroplastic	protein_coding	3.31612	5.13571	1.06806	2.66436	4.15069	2.40966	5.12113	4.72244	3.76354	1.42582	1.77587	0.809468	0.537861	0.572273	0.698177	0.125717	0.307282	1.35616	532	841	177	351	528	400	810	898	670	226	376	163	103	75	143	26	52	272
Zm00001d001973	chr2	3728194	3732158	-	Zm00001d001973	Zm00001d001973_T001	GO:0000176(nuclear exosome (RNase complex));GO:0000177(cytoplasmic exosome (RNase complex));GO:0000178(exosome (RNase complex));GO:0000467(exonucleolytic trimming to generate mature 3'-end of 5.8S rRNA from tricistronic rRNA transcript (SSU-rRNA, 5.8S rRNA, LSU-rRNA));GO:0003723(RNA binding);GO:0034427(nuclear-transcribed mRNA catabolic process, exonucleolytic, 3'-5');GO:0034475(U4 snRNA 3'-end p…	03018(RNA degradation)	K03679	NA	Exosome complex component RRP4 homolog	protein_coding	3.04802	3.12832	2.22834	3.23047	7.84882	5.8773	11.7664	4.09638	10.3361	1.24134	3.59763	1.37268	0.834241	0.601803	1.40392	0.200994	0.360157	0.782198	270	283	203	235	549	537	1026	429	1014	109	419	152	87	44	158	23	34	87
Zm00001d001984	chr2	3952212	3954752	-	Zm00001d001984	Zm00001d001984_T001;Zm00001d001984_T002	GO:0003333(amino acid transmembrane transport);GO:0005886(plasma membrane);GO:0015171(amino acid transmembrane transporter activity);GO:0016020(membrane);GO:0016021(integral component of membrane);GO:0016021(integral component of membrane)	NA	NA	NA	Probable amino acid permease 7	protein_coding	0.0001	0.0001	0.0001	0.082614	0.0001	0.0001	0.098668	0.0001	0.125442	1.57024	1.11661	1.05181	11.0308	6.1945	8.19985	4.10733	4.45767	2.38696	0	0	0	8	0	0	11	0	16	171	163	145	1428	557	1150	571	515	329
Zm00001d002159	chr2	6889076	6889357	+	Zm00001d002159	Zm00001d002159_T001	NA	NA	NA	NA	Wound induced protein	protein_coding	0.621735	0.0001	0.09707	0.0001	0.204217	0.980037	0.740364	0.43509	0.7508	1.32945	2.63964	2.58417	41.9179	18.4307	26.9045	16.8518	5.60257	8.53107	11	0	2	0	3	17	12	9	14	22	57	53	798	244	555	344	96	173
Zm00001d002256	chr2	9055230	9066257	+	Zm00001d002256	Zm00001d002256_T001;Zm00001d002256_T002;Zm00001d002256_T003;Zm00001d002256_T004;Zm00001d002256_T005;Zm00001d002256_T006;Zm00001d002256_T007;Zm00001d002256_T008;Zm00001d002256_T010;Zm00001d002256_T011;Zm00001d002256_T012;Zm00001d002256_T014;Zm00001d002256_T017;Zm00001d002256_T019;Zm00001d002256_T020;Zm00001d002256_T022;Zm00001d002256_T024;Zm00001d002256_T025	GO:0004373(glycogen (starch) synthase activity);GO:2001070(starch binding);GO:2001070(starch binding)	NA	NA	NA	Starch synthase 3 chloroplastic/amyloplastic	protein_coding	1.85248	2.56887	2.40618	6.15149	8.55415	5.27583	4.20532	2.33025	3.98755	1.25769	1.06401	1.27733	4.39105	1.21276	3.96309	15.376	12.4932	14.1885	606	857	807	1652	2208	1781	1355	901	1446	407	460	522	1686	324	1648	6317	4270	5772
Zm00001d002302	chr2	9791380	9800679	-	Zm00001d002302	Zm00001d002302_T001;Zm00001d002302_T002;Zm00001d002302_T003;Zm00001d002302_T004;Zm00001d002302_T005;Zm00001d002302_T006;Zm00001d002302_T007;Zm00001d002302_T008;Zm00001d002302_T009;Zm00001d002302_T010;Zm00001d002302_T011;Zm00001d002302_T012;Zm00001d002302_T013;Zm00001d002302_T014;Zm00001d002302_T015	GO:0009733(response to auxin);GO:0009733(response to auxin)	NA	NA	NA	Auxin responsive protein	protein_coding	0.0001	0.0001	0.0292745	0.227524	0.249581	0.501773	0.097423	0.0173294	0.101964	1.41052	4.80415	3.97977	13.7119	10.6557	22.0511	3.45022	3.8796	1.89415	0	0	6	37	39	103	20	5	23	279	1254	985	3190	1722	5553	863	808	471
Zm00001d002307	chr2	10000201	10001504	+	Zm00001d002307	Zm00001d002307_T001	NA	NA	NA	NA		protein_coding	15.4966	16.6997	15.3111	49.2446	78.4879	76.3176	17.491	22.079	22.3488	5.63329	6.02224	6.8141	17.9402	13.6415	22.0494	3.44195	2.75838	3.09911	1083	1192	1099	2825	4335	5507	1206	1828	1734	388	555	594	1474	778	1961	303	202	270
Zm00001d002347	chr2	10657877	10658439	-	Zm00001d002347	Zm00001d002347_T001	NA	NA	NA	NA	Bifunctional inhibitor/lipid-transfer protein/seed storage 2S albumin superfamily protein	protein_coding	214.06	17.5033	22.5767	115.48	147.41	234.035	269.382	100.039	44.9975	7.45859	11.8701	10.1746	0.330648	0.458172	0.167249	1.48949	0.430824	0.629916	6920	578	750	3064	3767	7813	8592	3832	1615	238	506	410	13	13	7	61	15	26
Zm00001d002350	chr2	10686293	10689881	+	kaurene synthase2	Zm00001d002350_T001	GO:0000287(magnesium ion binding);GO:0010333(terpene synthase activity);GO:0016102(diterpenoid biosynthetic process);GO:0016829(lyase activity)	NA	NA	NA	kaurene synthase2	protein_coding	6.06005	5.59292	16.6854	0.196191	0.088446	0.186331	1.51254	1.81491	1.20432	13.6939	5.84024	8.26107	1.09107	0.213802	0.953424	51.9125	56.6139	75.2934	650	613	1836	18	8	21	160	231	144	1446	825	1104	138	19	131	7011	6357	10063
Zm00001d002426	chr2	12406436	12411685	-	Zm00001d002426	Zm00001d002426_T001;Zm00001d002426_T002;Zm00001d002426_T003;Zm00001d002426_T004	GO:0000302(response to reactive oxygen species);GO:0004601(peroxidase activity);GO:0006979(response to oxidative stress);GO:0009507(chloroplast);GO:0009535(chloroplast thylakoid membrane);GO:0016554(cytidine to uridine editing);GO:0020037(heme binding);GO:0034599(cellular response to oxidative stress);GO:0042744(hydrogen peroxide catabolic process);GO:0055114(oxidation-reduction process);GO:00988…	00053(Ascorbate and aldarate metabolism);00480(Glutathione metabolism);00480(Glutathione metabolism)	K00434	EC:1.11.1.11	Thylakoid lumenal 29 kDa protein chloroplastic	protein_coding	232.28	256.364	213.517	58.2821	73.6478	68.8583	38.039	178.404	54.9709	181.408	170.276	165.445	22.7675	17.5406	32.1946	22.2562	25.1663	16.4594	40451	45576	38170	8332	10138	12385	6537	36812	10627	31115	39076	35900	4661	2492	7137	4884	4592	3575
Zm00001d002439	chr2	12647395	12650397	-	G2-like-transcription factor 36	Zm00001d002439_T001;Zm00001d002439_T002	GO:0003677(DNA binding);GO:0005634(nucleus);GO:0016301(kinase activity);GO:0016310(phosphorylation);GO:0016310(phosphorylation)	NA	NA	NA	G2-like transcription factor	protein_coding	0.847817	0.492638	0.907998	0.168659	0.635212	0.360295	2.47723	1.24321	3.0927	2.11279	3.75992	3.57473	1.45084	0.637199	1.32314	14.6288	21.4185	16.2897	112	67	123	19	66	49	321	193	450	273	649	583	223	69	221	2410	2934	2656
Zm00001d002462	chr2	13293936	13307750	+	Zm00001d002462	Zm00001d002462_T001;Zm00001d002462_T002;Zm00001d002462_T003;Zm00001d002462_T004;Zm00001d002462_T005;Zm00001d002462_T006;Zm00001d002462_T007;Zm00001d002462_T008;Zm00001d002462_T009;Zm00001d002462_T010;Zm00001d002462_T011;Zm00001d002462_T012;Zm00001d002462_T014;Zm00001d002462_T015;Zm00001d002462_T017;Zm00001d002462_T018;Zm00001d002462_T020;Zm00001d002462_T021;Zm00001d002462_T022;Zm00001d002462_T023…	GO:0000166(nucleotide binding);GO:0003735(structural constituent of ribosome);GO:0005524(ATP binding);GO:0005778(peroxisomal membrane);GO:0005829(cytosol);GO:0005840(ribosome);GO:0006412(translation);GO:0006625(protein targeting to peroxisome);GO:0007031(peroxisome organization);GO:0016558(protein import into peroxisome matrix);GO:0016887(ATPase activity);GO:0016887(ATPase activity)	03010(Ribosome);03010(Ribosome)	K02925	NA	Peroxisome biogenesis protein 6	protein_coding	2.34248	2.19819	2.45205	3.35435	4.65504	4.83524	4.44048	2.22882	4.40981	0.271115	0.626778	0.338817	2.12746	1.78442	2.39845	0.288532	0.250703	0.252526	1645	1570	1770	1934	2587	3497	3074	1853	3435	189	585	301	1750	1020	2136	258	188	226
Zm00001d002489	chr2	13850163	13852195	+	PLATZ-transcription factor 5	Zm00001d002489_T001	NA	NA	NA	NA	PLATZ transcription factor family protein	protein_coding	20.3208	16.8556	19.0268	70.3483	81.2332	67.4509	44.6094	20.3033	42.4007	3.49716	10.1577	8.72305	17.4885	11.2686	20.6425	9.23212	5.12731	7.68501	1761	1491	1693	5003	5563	6035	3814	2085	4078	299	1160	942	1781	797	2276	1008	466	831
Zm00001d002524	chr2	14753035	14753853	+	Zm00001d002524	Zm00001d002524_T001	NA	NA	NA	NA		protein_coding	0.0001	0.0001	0.0001	0.0001	0.0001	0.0001	0.0001	0.0001	0.0001	0.0001	0.060463	0.0001	3.30133	0.73542	1.35196	1.51865	0.381974	1.92421	0	0	0	0	0	0	0	0	0	0	4	0	183	29	81	90	19	113
Zm00001d002533	chr2	14891505	14892330	+	Zm00001d002533	Zm00001d002533_T001	GO:0004601(peroxidase activity);GO:0004864(protein phosphatase inhibitor activity);GO:0005634(nucleus);GO:0005737(cytoplasm);GO:0006979(response to oxidative stress);GO:0009738(abscisic acid-activated signaling pathway);GO:0010427(abscisic acid binding);GO:0020037(heme binding);GO:0032515(negative regulation of phosphoprotein phosphatase activity);GO:0038023(signaling receptor activity);GO:005511…	NA	NA	NA	Abscisic acid receptor PYL9	protein_coding	7.18476	8.90069	8.06833	25.4323	36.9248	46.6194	31.1498	13.8646	42.5434	2.73999	6.50717	7.97428	21.2761	13.2228	13.444	2.96807	2.54893	11.3437	240	304	277	697	974	1606	1026	548	1576	91	287	332	835	360	571	125	90	472
Zm00001d002584	chr2	16080982	16082543	-	Zm00001d002584	Zm00001d002584_T001	NA	NA	NA	NA		protein_coding	0.10111	0.0001	0.0001	6.41889	12.4697	21.4036	0.609202	0.167091	0.268629	0.174779	0.064059	0.074742	4.03466	2.16927	1.71995	2.25022	3.19768	21.328	5	0	0	225	421	943	26	9	13	8	4	4	203	76	94	121	143	1135
Zm00001d002650	chr2	18176301	18185185	+	argonaute1c	Zm00001d002650_T001;Zm00001d002650_T002;Zm00001d002650_T003;Zm00001d002650_T004;Zm00001d002650_T005;Zm00001d002650_T006;Zm00001d002650_T007;Zm00001d002650_T009;Zm00001d002650_T010;Zm00001d002650_T011;Zm00001d002650_T012;Zm00001d002650_T013;Zm00001d002650_T014;Zm00001d002650_T015;Zm00001d002650_T016;Zm00001d002650_T017;Zm00001d002650_T018;Zm00001d002650_T045;Zm00001d002650_T046;Zm00001d002650_T050…	GO:0003676(nucleic acid binding);GO:0005515(protein binding);GO:0031047(gene silencing by RNA);GO:0031047(gene silencing by RNA)	NA	K11593	NA	argonaute1c	protein_coding	7.68614	12.6219	11.6706	10.0345	12.0518	15.6993	4.76471	12.6532	7.10322	11.821	14.0983	11.8391	60.2827	34.1481	28.7562	32.1634	18.1711	8.68493	2855	4783	4449	3058	3536	6016	1748	5564	2927	4322	6895	5475	26275	10334	13576	15031	7061	4017
Zm00001d002693	chr2	19414196	19420375	-	Zm00001d002693	Zm00001d002693_T001	GO:0004672(protein kinase activity);GO:0004842(ubiquitin-protein transferase activity);GO:0005524(ATP binding);GO:0006468(protein phosphorylation);GO:0016567(protein ubiquitination)	NA	NA	NA	U-box domain-containing protein 33	protein_coding	1.08472	0.704304	1.1436	2.55767	1.77386	2.13048	1.78287	1.21812	1.83954	0.205764	0.179209	0.262833	0.850142	0.592739	0.794722	0.241581	0.057889	0.171504	164	109	178	317	212	332	266	218	309	31	36	50	151	73	153	46	10	33
Zm00001d002799	chr2	22972434	22973879	-	Homeobox-transcription factor 66	Zm00001d002799_T001	GO:0003677(DNA binding);GO:0003700(DNA-binding transcription factor activity);GO:0005634(nucleus);GO:0006355(regulation of transcription, DNA-templated);GO:0043565(sequence-specific DNA binding);GO:0045893(positive regulation of transcription, DNA-templated)	NA	NA	NA	Homeobox-leucine zipper protein ATHB-12	protein_coding	0.0001	0.0001	0.0001	0.264017	0.925484	0.563126	1.67845	0.0001	0.765425	0.0001	0.151702	0.0001	2.27387	0.618143	7.34717	88.2022	88.6456	72.905	0	0	0	17	56	44	126	0	65	0	16	0	202	39	706	8390	7011	6863
Zm00001d002835	chr2	24248332	24253472	-	Zm00001d002835	Zm00001d002835_T001;Zm00001d002835_T002;Zm00001d002835_T003;Zm00001d002835_T004;Zm00001d002835_T005;Zm00001d002835_T006;Zm00001d002835_T007;Zm00001d002835_T008;Zm00001d002835_T009	GO:0004672(protein kinase activity);GO:0005515(protein binding);GO:0005524(ATP binding);GO:0006468(protein phosphorylation);GO:0016020(membrane);GO:0016021(integral component of membrane);GO:0016301(kinase activity);GO:0016310(phosphorylation);GO:0016310(phosphorylation)	NA	NA	NA	Probable LRR receptor-like serine/threonine-protein kinase	protein_coding	0.555929	0.34745	0.405095	3.39146	3.90458	6.69658	2.14042	0.496512	3.42211	0.592872	0.93471	0.590464	0.481841	0.171371	0.28553	0.0001	0.151151	0.0142617	119	75	89	591	653	1459	448	125	803	124	263	157	121	30	78	0	35	4
Zm00001d002836	chr2	24258448	24264660	-	Zm00001d002836	Zm00001d002836_T001;Zm00001d002836_T002;Zm00001d002836_T004;Zm00001d002836_T005;Zm00001d002836_T006	GO:0016020(membrane);GO:0016021(integral component of membrane);GO:0046527(glucosyltransferase activity);GO:0046527(glucosyltransferase activity)	NA	NA	NA	downstream target of AGL15 2	protein_coding	1.1279	2.12421	2.24765	15.3175	16.782	16.5106	16.7529	4.75367	15.5632	0.742467	1.04547	0.788468	3.88057	2.88291	4.1032	0.890556	0.278403	3.22034	280	539	572	3111	3282	4218	4089	1396	4274	181	342	245	1129	584	1294	280	73	995
Zm00001d002899	chr2	26144895	26145908	-	Zm00001d002899	Zm00001d002899_T001	GO:0004601(peroxidase activity);GO:0005576(extracellular region);GO:0006979(response to oxidative stress);GO:0009505(plant-type cell wall);GO:0009506(plasmodesma);GO:0016491(oxidoreductase activity);GO:0020037(heme binding);GO:0042744(hydrogen peroxide catabolic process);GO:0046872(metal ion binding);GO:0055114(oxidation-reduction process);GO:0098869(cellular oxidant detoxification)	NA	NA	NA	Peroxidase 12	protein_coding	0.0001	0.0001	0.0001	0.0001	0.0001	0.0001	0.0001	0.0001	0.0001	0.608775	0.434482	0.309893	1.89256	0.633446	6.09804	0.361417	1.58785	1.47136	0	0	0	0	0	0	0	0	0	35	34	23	130	31	452	27	97	107
Zm00001d002928	chr2	26785403	26786596	+	Zm00001d002928	Zm00001d002928_T001	NA	NA	NA	NA	DUF740 family protein	protein_coding	7.15566	6.11883	4.22179	3.38979	13.0321	8.44957	5.57458	5.63572	2.50642	4.11753	10.4924	9.99386	3.53815	2.75876	4.59839	6.27672	7.87893	20.5015	454	397	275	177	654	554	349	424	177	258	878	791	264	143	372	502	524	1622
Zm00001d002954	chr2	28067652	28084390	-	Zm00001d002954	Zm00001d002954_T001;Zm00001d002954_T002	GO:0005622(intracellular);GO:0005739(mitochondrion);GO:0005758(mitochondrial intermembrane space);GO:0005777(peroxisome);GO:0006625(protein targeting to peroxisome);GO:0015035(protein disulfide oxidoreductase activity);GO:0022417(protein maturation by protein folding);GO:0045041(protein import into mitochondrial intermembrane space);GO:0055114(oxidation-reduction process);GO:0055114(oxidation-red…	NA	K17782	NA	Cox19-like CHCH family protein	protein_coding	0.212424	0.457171	0.256115	1.29396	2.09687	1.94811	1.85593	0.733871	2.18284	0.0001	0.0727348	0.0432112	0.261397	0.353515	0.470994	0.0898297	0.0372666	0.439135	41	89	51	202	314	381	347	165	458	0	19	11	59	55	114	22	8	104
Zm00001d002989	chr2	28930734	28935603	-	cytokinin oxidase12	Zm00001d002989_T001	GO:0003824(catalytic activity);GO:0009690(cytokinin metabolic process);GO:0016491(oxidoreductase activity);GO:0019139(cytokinin dehydrogenase activity);GO:0050660(flavin adenine dinucleotide binding);GO:0055114(oxidation-reduction process);GO:0071949(FAD binding)	00908(Zeatin biosynthesis)	K00279	EC:1.5.99.12	cytokinin oxidase12	protein_coding	3.80971	0.696932	0.416819	0.944242	1.11413	1.91618	0.06876	0.100656	0.361679	1.43754	11.9712	8.29077	0.231223	0.140649	0.38455	7.00374	11.5579	2.31878	420	79	48	86	97	218	8	14	45	156	1737	1138	30	13	54	972	1333	319
Zm00001d003025	chr2	29747763	29749475	+	ammonium transporter3	Zm00001d003025_T001	GO:0005887(integral component of plasma membrane);GO:0008519(ammonium transmembrane transporter activity);GO:0015696(ammonium transport);GO:0016020(membrane);GO:0016021(integral component of membrane);GO:0072488(ammonium transmembrane transport)	NA	K03320	NA	ammonium transporter3	protein_coding	6.0034	9.00152	12.7796	0.312519	0.282845	0.271477	1.88593	2.37819	1.3933	4.24491	3.3699	3.35881	0.992584	1.53759	1.86477	0.111919	0.16101	0.103406	591	904	1291	26	22	28	183	278	153	412	437	412	115	124	234	14	17	13
Zm00001d003099	chr2	32030522	32034880	+	Zm00001d003099	Zm00001d003099_T001;Zm00001d003099_T002;Zm00001d003099_T003	GO:0016020(membrane);GO:0016021(integral component of membrane);GO:0016021(integral component of membrane)	NA	NA	NA	Serinc-domain containing serine and sphingolipid biosynthesis protein	protein_coding	0.358667	0.8103	0.346514	0.500335	0.817335	0.349094	23.0405	1.67067	17.2998	0.513306	0.0550567	0.0431588	1.4252	1.16164	1.20439	0.0700312	0.292568	2.90473	34	75	32	37	59	33	2019	177	1706	45	7	5	150	85	137	8	28	322
Zm00001d003110	chr2	32540978	32544536	-	Zm00001d003110	Zm00001d003110_T001;Zm00001d003110_T002;Zm00001d003110_T003;Zm00001d003110_T004	GO:0000166(nucleotide binding);GO:0004672(protein kinase activity);GO:0004674(protein serine/threonine kinase activity);GO:0005524(ATP binding);GO:0005886(plasma membrane);GO:0006468(protein phosphorylation);GO:0009506(plasmodesma);GO:0016301(kinase activity);GO:0016310(phosphorylation);GO:0046777(protein autophosphorylation);GO:0046777(protein autophosphorylation)	NA	NA	NA	Calmodulin-binding receptor-like cytoplasmic kinase 3	protein_coding	0.194255	0.0343133	0.136671	0.794508	2.60557	1.3383	0.592526	0.218665	0.862637	0.0001	0.292461	0.0583078	0.477274	0.64339	0.538601	0.0001	0.0001	0.0291357	20	4	15	69	213	144	61	27	99	0	40	8	59	55	71	0	0	4
Zm00001d003140	chr2	33434810	33437031	-	Zm00001d003140	Zm00001d003140_T001	GO:0004497(monooxygenase activity);GO:0005506(iron ion binding);GO:0016020(membrane);GO:0016491(oxidoreductase activity);GO:0016705(oxidoreductase activity, acting on paired donors, with incorporation or reduction of molecular oxygen);GO:0016709(oxidoreductase activity, acting on paired donors, with incorporation or reduction of molecular oxygen, NAD(P)H as one donor, and incorporation of one ato…	NA	K00512	1.14.14.32;EC:1.14.14.19	Cytochrome P450 71A26	protein_coding	0.593902	0.157744	1.62243	97.244	116.11	127.163	19.9499	3.77925	15.6526	0.0001	0.222711	0.064807	43.4958	24.2748	49.2896	99.3677	47.0703	96.9776	68	19	191	9133	10501	15027	2253	513	1989	0	34	10	5849	2266	7178	14324	5642	13836
Zm00001d003283	chr2	38745725	38747760	+	Zm00001d003283	Zm00001d003283_T001	GO:0004497(monooxygenase activity);GO:0005506(iron ion binding);GO:0016020(membrane);GO:0016021(integral component of membrane);GO:0016491(oxidoreductase activity);GO:0016705(oxidoreductase activity, acting on paired donors, with incorporation or reduction of molecular oxygen);GO:0016709(oxidoreductase activity, acting on paired donors, with incorporation or reduction of molecular oxygen, NAD(P)H…	NA	K20617	NA	Cytochrome P450 71B10	protein_coding	0.590923	0.643941	0.308209	1.88312	0.042253	4.06895	0.892027	0.056371	0.060172	0.987889	1.31087	0.895295	0.380007	0.182937	0.714389	1.67405	2.90838	3.53119	67	75	36	175	4	474	100	8	8	110	195	126	51	17	103	238	343	496
Zm00001d003287	chr2	38811050	38812608	+	Zm00001d003287	Zm00001d003287_T001	GO:0005886(plasma membrane);GO:0010167(response to nitrate);GO:0015112(nitrate transmembrane transporter activity);GO:0015706(nitrate transport);GO:0016020(membrane);GO:0016021(integral component of membrane);GO:0042128(nitrate assimilation)	NA	NA	NA	nitrate transport4	protein_coding	1.76945	0.237852	0.321953	0.589509	1.18836	2.33404	2.14461	0.308664	0.774259	5.78013	8.53805	11.5552	1.40992	1.35421	9.25788	28.2205	56.6781	88.1745	92	13	18	25	49	125	110	19	45	294	581	744	86	58	609	1835	3065	5675
Zm00001d003304	chr2	39497247	39499853	-	Zm00001d003304	Zm00001d003304_T001	GO:0004867(serine-type endopeptidase inhibitor activity);GO:0005576(extracellular region);GO:0010466(negative regulation of peptidase activity);GO:0010951(negative regulation of endopeptidase activity);GO:0030414(peptidase inhibitor activity)	NA	NA	NA	Bowman-Birk type bran trypsin inhibitor	protein_coding	0.0001	0.0001	0.0001	0.0001	0.63543	0.551674	0.0001	0.172249	0.0001	0.0001	1.43688	1.23293	9.03265	6.94991	31.0279	0.0001	2.00253	9.71344	0	0	0	0	19	22	0	8	0	0	71	58	397	212	1476	0	79	453
Zm00001d003311	chr2	39752127	39753847	+	Zm00001d003311	Zm00001d003311_T001	GO:0009852(auxin catabolic process);GO:0010252(auxin homeostasis);GO:0016491(oxidoreductase activity);GO:0046872(metal ion binding);GO:0050302(indole-3-acetaldehyde oxidase activity);GO:0051213(dioxygenase activity);GO:0055114(oxidation-reduction process)	NA	NA	NA	Probable 2-oxoglutarate-dependent dioxygenase AOP1	protein_coding	24.5308	13.0499	16.3506	350.213	353.357	464.922	4.52209	12.7807	13.7076	1.95317	2.18574	1.88561	113.175	31.5711	84.099	1.25344	1.55538	2.52295	2122	1152	1452	24854	24149	41515	386	1310	1316	167	250	204	11500	2227	9255	137	141	272
Zm00001d003395	chr2	42789053	42794069	+	anthranilate synthase homolog1	Zm00001d003395_T001;Zm00001d003395_T003;Zm00001d003395_T004;Zm00001d003395_T005	GO:0000162(tryptophan biosynthetic process);GO:0005950(anthranilate synthase complex);GO:0006541(glutamine metabolic process);GO:0006541(glutamine metabolic process)	00400(Phenylalanine, tyrosine and tryptophan biosynthesis);00400(Phenylalanine, tyrosine and tryptophan biosynthesis)	K01658	EC:4.1.3.27	anthranilate synthase homolog1	protein_coding	17.8105	11.9467	10.4716	2.8652	7.06934	3.66128	19.775	11.1301	19.1622	67.2377	70.8004	68.9577	25.5978	11.3913	42.5069	66.8614	62.2729	69.2728	2527	1731	1525	336	794	537	2768	1872	3018	9393	13234	12187	4268	1319	7673	11948	9252	12250
Zm00001d003469	chr2	45238738	45242608	-	Zm00001d003469	Zm00001d003469_T001;Zm00001d003469_T002	GO:0005351(carbohydrate:proton symporter activity);GO:0005355(glucose transmembrane transporter activity);GO:0005887(integral component of plasma membrane);GO:0008643(carbohydrate transport);GO:0008645(hexose transmembrane transport);GO:0016020(membrane);GO:0016021(integral component of membrane);GO:0022857(transmembrane transporter activity);GO:0046323(glucose import);GO:0055085(transmembrane tr…	NA	NA	NA	Sugar transport protein 5	protein_coding	0.843258	0.377409	0.771479	4.95455	9.00475	14.0289	3.02431	1.54581	2.9928	0.435521	0.362683	0.258233	2.10049	1.04266	2.65092	0.49615	0.407906	0.325788	93	43	87	446	781	1589	328	201	365	48	53	36	271	94	371	69	47	45
Zm00001d003502	chr2	46156330	46162045	-	Zm00001d003502	Zm00001d003502_T001;Zm00001d003502_T002;Zm00001d003502_T003;Zm00001d003502_T004;Zm00001d003502_T005;Zm00001d003502_T006;Zm00001d003502_T007;Zm00001d003502_T008	GO:0005786(signal recognition particle, endoplasmic reticulum targeting);GO:0006614(SRP-dependent cotranslational protein targeting to membrane);GO:0006616(SRP-dependent cotranslational protein targeting to membrane, translocation);GO:0006617(SRP-dependent cotranslational protein targeting to membrane, signal sequence recognition);GO:0008312(7S RNA binding);GO:0048500(signal recognition particle)…	03060(Protein export);03060(Protein export)	K03105	NA	Signal recognition particle 19 kDa protein	protein_coding	2.66864	1.77385	1.67326	2.46833	2.66686	3.89838	2.27497	2.60529	1.28548	3.34965	4.91269	5.37245	8.83635	8.0725	11.1216	4.64297	5.89611	16.056	863	586	556	654	682	1300	728	998	463	1065	2089	2160	3352	2125	4565	1887	1993	6456
Zm00001d003593	chr2	49227070	49227546	+	Zm00001d003593	Zm00001d003593_T001	NA	NA	NA	NA	Expressed protein; protein	protein_coding	11.0382	11.9799	12.8453	1.06062	0.790918	3.07281	5.40142	4.11639	2.53339	14.0213	29.3832	29.6426	8.97562	8.96521	10.872	9.35519	14.567	45.0883	303	335	362	24	18	87	146	134	78	379	1061	1012	289	201	379	323	418	1540
Zm00001d003603	chr2	49591583	49595579	+	Zm00001d003603	Zm00001d003603_T001;Zm00001d003603_T002	GO:0015333(peptide:proton symporter activity);GO:0016020(membrane);GO:0016021(integral component of membrane);GO:0022857(transmembrane transporter activity);GO:0035672(oligopeptide transmembrane transport);GO:0035673(oligopeptide transmembrane transporter activity);GO:0042886(amide transport);GO:0055085(transmembrane transport);GO:1902600(proton transmembrane transport);GO:1904680(peptide transme…	NA	NA	NA	Protein NRT1/ PTR FAMILY 4.4	protein_coding	0.522372	2.07278	0.685732	1.34848	1.67228	1.45393	0.955832	2.17346	1.50577	1.54668	0.908062	1.15784	5.29251	4.38007	8.24423	9.66373	9.40155	11.4737	57	229	77	120	144	163	102	279	181	165	130	156	673	387	1134	1315	1064	1546
Zm00001d003659	chr2	52839413	52844416	-	SnRK2 serine threonine protein kinase7	Zm00001d003659_T001;Zm00001d003659_T002;Zm00001d003659_T003;Zm00001d003659_T004;Zm00001d003659_T005;Zm00001d003659_T006;Zm00001d003659_T008;Zm00001d003659_T009;Zm00001d003659_T010	GO:0000166(nucleotide binding);GO:0004672(protein kinase activity);GO:0004674(protein serine/threonine kinase activity);GO:0005524(ATP binding);GO:0005634(nucleus);GO:0005737(cytoplasm);GO:0006468(protein phosphorylation);GO:0016301(kinase activity);GO:0016310(phosphorylation);GO:0035556(intracellular signal transduction);GO:0042742(defense response to bacterium);GO:0042742(defense response to ba…	NA	NA	NA	Serine/threonine-protein kinase SRK2A	protein_coding	1.60184	1.39916	0.684278	0.68399	0.968491	0.97072	0.589719	1.22909	0.626445	0.394881	0.380766	0.504906	0.145727	0.0961734	0.366962	0.0513905	0.157947	0.198746	415	369	182	146	199	259	151	377	180	101	133	163	45	21	121	17	43	66
Zm00001d003669	chr2	53281649	53283425	-	Zm00001d003669	Zm00001d003669_T001	GO:0016020(membrane);GO:0016021(integral component of membrane)	NA	NA	NA		protein_coding	16.0004	3.80262	5.09709	26.2064	25.1394	97.7721	7.13279	4.38221	17.3171	1.4559	2.4028	1.70765	7.15673	4.01804	3.06364	0.056602	0.25278	0.968962	1200	292	393	1613	1490	7572	528	390	1442	108	238	160	631	246	293	6	20	91
Zm00001d003778	chr2	58999294	59005449	+	Zm00001d003778	Zm00001d003778_T001	GO:0000166(nucleotide binding);GO:0005524(ATP binding);GO:0009941(chloroplast envelope);GO:0016021(integral component of membrane);GO:0016887(ATPase activity);GO:0042626(ATPase-coupled transmembrane transporter activity);GO:0055085(transmembrane transport)	NA	K02021	NA	ABC transporter B family member 29 chloroplastic	protein_coding	10.2131	14.045	14.6964	3.14106	4.27077	5.35815	5.4616	5.7071	4.61275	4.39144	4.17915	2.81923	1.69167	0.884083	1.72515	0.410869	0.626851	2.46476	1396	1960	2062	353	462	757	737	925	700	592	753	481	272	99	300	71	90	420
Zm00001d003781	chr2	59180386	59182787	-	Zm00001d003781	Zm00001d003781_T001;Zm00001d003781_T002	GO:0004089(carbonate dehydratase activity);GO:0006730(one-carbon metabolic process);GO:0008270(zinc ion binding);GO:0016829(lyase activity);GO:0016836(hydro-lyase activity);GO:0046872(metal ion binding);GO:0046872(metal ion binding)	00910(Nitrogen metabolism);00910(Nitrogen metabolism)	K01674	EC:4.2.1.1	Alpha carbonic anhydrase 1 chloroplastic	protein_coding	64.7283	64.4577	76.9685	3.37954	7.56287	2.20791	19.6442	38.4161	23.7812	44.0609	40.5379	58.0978	8.84888	3.07967	20.3132	115.096	61.4831	20.5208	6111	6212	7459	262	565	216	1830	4297	2493	4097	5043	6833	982	238	2441	13686	6079	2415
Zm00001d003861	chr2	63431223	63436171	-	Zm00001d003861	Zm00001d003861_T001;Zm00001d003861_T002	GO:0006811(ion transport);GO:0006813(potassium ion transport);GO:0015079(potassium ion transmembrane transporter activity);GO:0016020(membrane);GO:0016021(integral component of membrane);GO:0071805(potassium ion transmembrane transport);GO:0071805(potassium ion transmembrane transport)	NA	NA	NA	Potassium high-affinity transporter	protein_coding	0.347211	0.62545	0.150444	1.46987	1.58703	1.22004	30.6346	2.17636	30.0585	1.45396	1.4287	0.99652	3.56399	2.4557	5.26066	0.718884	0.375023	1.5252	77	140	34	266	276	277	6621	565	7309	314	413	272	918	439	1467	199	87	417
Zm00001d003939	chr2	70548849	70558717	-	Zm00001d003939	Zm00001d003939_T001;Zm00001d003939_T002;Zm00001d003939_T003;Zm00001d003939_T004;Zm00001d003939_T005;Zm00001d003939_T006;Zm00001d003939_T007;Zm00001d003939_T008;Zm00001d003939_T009;Zm00001d003939_T010;Zm00001d003939_T011;Zm00001d003939_T012;Zm00001d003939_T013;Zm00001d003939_T014;Zm00001d003939_T015;Zm00001d003939_T016;Zm00001d003939_T017	GO:0005774(vacuolar membrane);GO:0016020(membrane);GO:0016021(integral component of membrane);GO:0055085(transmembrane transport);GO:0055085(transmembrane transport)	NA	NA	NA	Probable metal-nicotianamine transporter YSL6	protein_coding	2.38189	1.8276	3.16393	7.5837	15.4329	13.1328	7.77343	3.9151	7.98816	0.461227	0.568771	0.606298	2.45556	2.33207	3.31985	1.03569	0.769138	1.19356	1117	878	1525	2921	5719	6358	3598	2177	4158	216	352	355	1354	893	1982	614	379	700
Zm00001d003966	chr2	72600749	72601084	+	Zm00001d003966	Zm00001d003966_T001	NA	NA	NA	NA		protein_coding	11.7073	29.2481	37.7931	24.2766	33.8709	27.4849	59.0938	21.841	51.8567	22.1018	19.3282	20.2763	91.651	57.9639	154.85	4.57459	5.30131	1.92803	226	576	749	385	517	548	1125	500	1111	420	492	488	2078	913	3802	112	108	47
Zm00001d004230	chr2	94054835	94067869	+	Homeobox-transcription factor 96	Zm00001d004230_T001;Zm00001d004230_T002;Zm00001d004230_T003;Zm00001d004230_T004;Zm00001d004230_T005;Zm00001d004230_T006;Zm00001d004230_T007;Zm00001d004230_T008;Zm00001d004230_T009;Zm00001d004230_T010;Zm00001d004230_T011;Zm00001d004230_T012;Zm00001d004230_T013;Zm00001d004230_T014;Zm00001d004230_T015;Zm00001d004230_T020;Zm00001d004230_T021;Zm00001d004230_T022;Zm00001d004230_T023;Zm00001d004230_T025…	GO:0003677(DNA binding);GO:0003777(microtubule motor activity);GO:0005634(nucleus);GO:0006355(regulation of transcription, DNA-templated);GO:0007018(microtubule-based movement);GO:0008289(lipid binding);GO:0016020(membrane);GO:0016021(integral component of membrane);GO:0043565(sequence-specific DNA binding);GO:0043565(sequence-specific DNA binding)	NA	NA	NA	Homeodomain leucine zipper family IV protein	protein_coding	0.0001	0.0001	0.0001	0.0001	0.0001	0.0001	0.0001	0.0001	0.0001	0.000247778	0.000737469	0.00115459	0.327434	0.25441	0.3493	0.158225	0.175739	0.157866	0	0	0	0	0	0	0	0	0	1	1	1	219	118	253	114	105	112
Zm00001d004335	chr2	104167039	104172347	-	Zm00001d004335	Zm00001d004335_T001	GO:0000166(nucleotide binding);GO:0005524(ATP binding);GO:0005886(plasma membrane);GO:0016020(membrane);GO:0016021(integral component of membrane);GO:0016887(ATPase activity);GO:0042626(ATPase-coupled transmembrane transporter activity);GO:0055085(transmembrane transport)	NA	NA	NA	ABC transporter G family member 24	protein_coding	4.22766	1.76352	2.23163	2.29989	3.60785	4.72205	7.62314	1.35015	13.0297	1.1504	5.75416	3.14434	1.17498	0.192418	1.47894	1.94594	2.02788	1.5411	892	380	484	399	602	1029	1587	338	3051	240	1600	827	292	34	398	518	449	406
Zm00001d004375	chr2	107040785	107042488	-	Zm00001d004375	Zm00001d004375_T001	GO:0045927(positive regulation of growth)	NA	NA	NA		protein_coding	0.11107	0.075027	0.0001	3.07428	3.78503	13.0938	2.2165	0.489307	2.20376	0.272044	0.014582	0.030516	4.82282	1.82558	1.51544	0.245576	0.295227	20.2119	11	8	0	247	293	1323	214	57	240	27	2	4	555	146	189	31	31	2466
Zm00001d004389	chr2	108158838	108160344	+	Zm00001d004389	Zm00001d004389_T001	GO:0004497(monooxygenase activity);GO:0004499(N,N-dimethylaniline monooxygenase activity);GO:0016491(oxidoreductase activity);GO:0050660(flavin adenine dinucleotide binding);GO:0050661(NADP binding);GO:0055114(oxidation-reduction process)	NA	NA	NA	Probable flavin-containing monooxygenase 1	protein_coding	22.6533	32.3108	24.7325	1.51586	0.997123	2.30392	8.32783	20.9775	15.3157	1.09068	5.64864	3.20378	0.0001	0.0001	0.0001	0.0001	0.069522	0.154367	1755	2555	1967	97	62	185	637	1926	1317	84	577	310	0	0	0	0	6	15
Zm00001d004521	chr2	116470474	116480753	-	MYB-related-transcription factor 114	Zm00001d004521_T001;Zm00001d004521_T002;Zm00001d004521_T004	GO:0003677(DNA binding);GO:0005515(protein binding);GO:0005634(nucleus);GO:0008270(zinc ion binding);GO:0046872(metal ion binding);GO:0046872(metal ion binding)	NA	NA	NA	SWI/SNF complex subunit SWI3D	protein_coding	0.529091	0.460038	0.846231	0.580697	0.795964	0.978877	2.39915	1.17113	3.15648	0.580814	1.14073	0.676354	3.03929	1.40352	1.52009	0.252323	0.393349	0.568756	119	106	195	108	142	227	532	312	787	130	338	190	802	257	435	72	93	160
Zm00001d004804	chr2	140341974	140345724	+	Zm00001d004804	Zm00001d004804_T001;Zm00001d004804_T002	GO:0003824(catalytic activity);GO:0004564(beta-fructofuranosidase activity);GO:0004575(sucrose alpha-glucosidase activity);GO:0005829(cytosol);GO:0005975(carbohydrate metabolic process);GO:0005987(sucrose catabolic process);GO:0008152(metabolic process);GO:0016787(hydrolase activity);GO:0016798(hydrolase activity, acting on glycosyl bonds);GO:0033926(glycopeptide alpha-N-acetylgalactosaminidase a…	NA	NA	NA	Alkaline/neutral invertase CINV2	protein_coding	0.236722	0.233655	0.187339	0.331671	1.57657	0.672087	0.226839	0.105186	0.224	0.435322	2.25956	0.952986	7.23199	4.41112	5.88352	0.993242	2.15834	0.817513	36	36	29	41	188	105	34	19	38	65	449	179	1279	542	1127	189	340	154
Zm00001d004903	chr2	147882115	147883489	-	Zm00001d004903	Zm00001d004903_T001	NA	NA	NA	NA		protein_coding	22.0095	7.59142	19.5001	0.286588	0.262198	0.0001	2.58446	2.48108	6.41543	18.2877	30.042	27.0363	3.47006	3.35563	13.243	67.8296	49.3234	7.63516	1574	554	1431	17	15	0	183	211	510	1288	2830	2409	292	196	1205	6108	3693	681
Zm00001d004924	chr2	149026476	149029096	-	Zm00001d004924	Zm00001d004924_T001	GO:0003677(DNA binding);GO:0003680(AT DNA binding);GO:0005634(nucleus)	NA	NA	NA	AT-hook motif nuclear-localized protein 1	protein_coding	0.667767	0.128558	0.0001	20.3824	17.0242	29.1871	4.42951	2.36131	4.80185	0.0001	0.451377	0.072444	5.38312	1.84652	1.1294	0.0001	0.0001	0.234785	56	11	0	1394	1121	2512	365	234	445	0	50	8	528	126	120	0	0	25
Zm00001d005190	chr2	163038225	163041426	-	Zm00001d005190	Zm00001d005190_T001;Zm00001d005190_T002;Zm00001d005190_T003;Zm00001d005190_T006;Zm00001d005190_T007;Zm00001d005190_T008;Zm00001d005190_T009;Zm00001d005190_T010;Zm00001d005190_T011;Zm00001d005190_T012;Zm00001d005190_T013;Zm00001d005190_T014	GO:0000166(nucleotide binding);GO:0005385(zinc ion transmembrane transporter activity);GO:0005524(ATP binding);GO:0005886(plasma membrane);GO:0006812(cation transport);GO:0009506(plasmodesma);GO:0010043(response to zinc ion);GO:0015086(cadmium ion transmembrane transporter activity);GO:0016020(membrane);GO:0016021(integral component of membrane);GO:0019829(ATPase-coupled cation transmembrane tran…	NA	NA	NA	Cadmium/zinc-transporting ATPase HMA2	protein_coding	1.95755	0.85248	1.49964	26.7166	12.3859	22.772	10.9448	3.90312	19.4352	1.13021	1.14543	1.52785	14.6369	7.65373	8.57426	0.857801	0.982677	0.474528	339	151	266	3786	1692	4060	1865	800	3724	193	261	329	2970	1079	1885	187	179	103
Zm00001d005375	chr2	171336206	171337145	-	Zm00001d005375	Zm00001d005375_T001	GO:0004197(cysteine-type endopeptidase activity);GO:0005615(extracellular space);GO:0005764(lysosome);GO:0006508(proteolysis);GO:0008234(cysteine-type peptidase activity);GO:0051603(proteolysis involved in cellular protein catabolic process)	NA	NA	NA		protein_coding	11.6246	4.59158	7.08045	66.8584	86.8799	121.707	33.7494	14.2647	39.3014	2.32293	3.14992	3.2804	21.9004	13.1904	15.8944	3.49225	3.17434	13.4392	524	211	328	2471	3091	5658	1499	761	1964	103	187	184	1159	485	911	199	150	755
Zm00001d005456	chr2	174866938	174869050	-	Zm00001d005456	Zm00001d005456_T001	GO:0008194(UDP-glycosyltransferase activity);GO:0016740(transferase activity);GO:0016758(transferase activity, transferring hexosyl groups);GO:0043231(intracellular membrane-bounded organelle);GO:0080043(quercetin 3-O-glucosyltransferase activity);GO:0080044(quercetin 7-O-glucosyltransferase activity)	NA	NA	NA	UDP-glycosyltransferase 76C1	protein_coding	20.5566	13.8402	14.973	26.3897	20.8665	24.5248	17.6213	11.5105	27.2352	6.53212	4.35333	4.86908	3.43332	1.29078	2.31681	0.40345	1.22264	4.28515	2354	1618	1760	2480	1889	2900	1991	1562	3462	737	657	695	462	121	338	59	147	612
Zm00001d005457	chr2	174870233	174870574	+	Zm00001d005457	Zm00001d005457_T001	GO:0009507(chloroplast)	NA	NA	NA		protein_coding	444.227	477.672	582.924	247.398	286.181	335.388	336.392	477.948	481.089	110.336	125.829	131.968	53.0052	40.0248	53.3888	143.537	151.237	107.321	8723	9576	11750	3988	4442	6802	6517	11120	10486	2134	3256	3229	1224	642	1335	3551	3111	2628
Zm00001d005520	chr2	177218082	177221636	-	Zm00001d005520	Zm00001d005520_T001	NA	NA	NA	NA	Phosphoglycerate mutase family protein	protein_coding	4.63487	7.43057	6.133	1.60615	1.95061	2.80915	3.66737	5.99569	4.12936	18.5922	21.89	17.2197	10.4344	5.36288	8.57035	10.7951	9.16616	14.7698	246	403	334	70	82	154	192	377	244	972	1531	1139	651	233	579	722	510	977
Zm00001d005583	chr2	179523071	179523442	+	Zm00001d005583	Zm00001d005583_T001	GO:0004722(protein serine/threonine phosphatase activity);GO:0006470(protein dephosphorylation)	NA	NA	NA		protein_coding	0.014982	0.0001	0.0001	0.0001	0.0001	0.170469	0.105668	0.0001	0.0001	66.785	65.171	59.3291	20.6648	14.4224	18.2855	21.5296	19.7086	31.999	1	0	0	0	0	4	3	0	0	1405	1835	1579	519	252	498	580	441	853
Zm00001d005609	chr2	180648852	180649904	+	protein phosphatase homolog7	Zm00001d005609_T001	GO:0003824(catalytic activity);GO:0004721(phosphoprotein phosphatase activity);GO:0004722(protein serine/threonine phosphatase activity);GO:0004724(magnesium-dependent protein serine/threonine phosphatase activity);GO:0005634(nucleus);GO:0005829(cytosol);GO:0006470(protein dephosphorylation);GO:0016787(hydrolase activity);GO:0043169(cation binding);GO:0046872(metal ion binding)	04016(MAPK signaling pathway - plant);04075(Plant hormone signal transduction)	K14497	EC:3.1.3.16	protein phosphatase homolog7	protein_coding	1.44627	1.59693	0.736266	9.25868	15.5983	19.828	5.13992	0.856774	4.11079	0.389625	0.244507	0.749049	3.76842	2.23796	11.9466	7.88549	10.6784	13.1464	88	99	46	460	746	1238	307	62	276	24	20	57	268	111	920	601	677	991
Zm00001d005622	chr2	180965628	180967221	+	WRKY-transcription factor 38	Zm00001d005622_T001	GO:0003677(DNA binding);GO:0003700(DNA-binding transcription factor activity);GO:0005634(nucleus);GO:0006355(regulation of transcription, DNA-templated);GO:0043565(sequence-specific DNA binding)	NA	NA	NA	WRKY74-superfamily of TFs having WRKY and zinc finger domains	protein_coding	3.25082	2.8209	1.47111	5.86	10.5695	5.99493	6.62531	4.0908	11.6696	4.74856	13.6547	15.1523	17.5689	11.4535	30.764	44.0215	26.3119	16.8563	205	181	95	303	525	389	411	305	814	294	1131	1186	1297	587	2460	3484	1732	1321
Zm00001d005653	chr2	182137851	182141418	+	Zm00001d005653	Zm00001d005653_T001;Zm00001d005653_T002;Zm00001d005653_T003;Zm00001d005653_T004	GO:0016020(membrane);GO:0016021(integral component of membrane);GO:0016021(integral component of membrane)	NA	NA	NA		protein_coding	1.35096	0.234995	0.512599	0.820456	0.572507	0.471165	1.65599	0.211536	2.0035	1.54396	3.6194	4.17734	8.42489	7.15952	10.1082	3.79376	3.85478	4.40167	236	42	92	118	79	86	285	44	388	265	830	906	1721	1015	2235	831	702	954
Zm00001d005658	chr2	182513911	182516018	+	trehalose-6-phosphate phosphatase2	Zm00001d005658_T001	GO:0003824(catalytic activity);GO:0004805(trehalose-phosphatase activity);GO:0005992(trehalose biosynthetic process);GO:0016311(dephosphorylation);GO:0016787(hydrolase activity)	00500(Starch and sucrose metabolism)	K01087	EC:3.1.3.12	trehalose-6-phosphate phosphatase2	protein_coding	6.78318	2.92509	3.80491	53.3599	42.6929	42.9603	43.3324	18.3848	80.7372	2.79354	10.6918	7.58981	19.6246	14.2338	24.5868	4.07227	2.41103	3.96453	542	239	312	3498	2695	3544	3415	1740	7158	220	1126	756	1842	928	2499	410	202	395
Zm00001d005661	chr2	182615989	182617089	+	Zm00001d005661	Zm00001d005661_T001	NA	NA	NA	NA		protein_coding	0.0001	0.199385	0.144861	0.462078	0.954322	1.01959	0.061571	0.122121	0.08038	1.40339	1.28352	0.529169	3.9299	3.65577	7.55669	0.413393	3.06109	4.05378	0	13	10	24	48	67	4	10	6	88	107	42	292	189	608	33	203	320
Zm00001d005698	chr2	183790605	183791147	-	Zm00001d005698	Zm00001d005698_T001	GO:0008270(zinc ion binding);GO:0046872(metal ion binding)	NA	NA	NA	AN17	protein_coding	5.70938	2.69211	6.33359	34.1158	60.2255	46.1974	42.3199	7.38515	21.4447	12.0444	12.2313	9.90408	145.891	114.245	88.1655	13.4103	17.2981	333.625	179	86	203	873	1485	1488	1302	273	743	370	503	385	5345	2906	3498	527	565	12968
Zm00001d005741	chr2	185583870	185586367	-	Zm00001d005741	Zm00001d005741_T001	GO:0016020(membrane);GO:0016021(integral component of membrane);GO:0016655(oxidoreductase activity, acting on NAD(P)H, quinone or similar compound as acceptor);GO:0055114(oxidation-reduction process)	NA	NA	NA	NAD(P)H-quinone oxidoreductase subunit L chloroplastic	protein_coding	0.0001	0.0001	0.209891	0.0001	0.0001	0.0001	0.13788	0.0001	0.0001	202.166	158.978	218.128	12.6992	9.8399	18.9553	20.8161	23.608	6.24601	0	0	6	0	0	0	4	0	0	5465	5750	7460	410	221	663	720	679	214
Zm00001d005789	chr2	188710662	188711219	+	histone 2B3	Zm00001d005789_T001	GO:0000786(nucleosome);GO:0003677(DNA binding);GO:0005634(nucleus);GO:0005694(chromosome);GO:0006334(nucleosome assembly);GO:0046982(protein heterodimerization activity)	NA	K11252	NA	histone 2B3	protein_coding	21.4108	9.6571	9.66664	3.83684	6.15131	8.56255	27.3602	8.02752	21.8199	11.7582	46.5152	42.1777	19.1249	10.6865	15.7298	96.7114	108.362	124.678	686	316	318	101	156	284	865	305	776	372	1964	1684	721	280	642	3904	3637	4981
Zm00001d005790	chr2	188712428	188713414	-	Zm00001d005790	Zm00001d005790_T001	GO:0000139(Golgi membrane);GO:0005783(endoplasmic reticulum);GO:0005794(Golgi apparatus);GO:0006486(protein glycosylation);GO:0008378(galactosyltransferase activity);GO:0016020(membrane);GO:0016021(integral component of membrane);GO:0016740(transferase activity);GO:0016757(transferase activity, transferring glycosyl groups)	NA	NA	NA	Galactosyltransferase family protein	protein_coding	5.22775	2.26517	2.09726	2.05291	2.42262	3.53419	5.31264	1.13171	5.58924	1.47709	10.3141	7.14672	0.801279	0.158655	1.87419	12.0898	11.2467	14.7975	297	132	122	96	109	207	298	76	352	83	771	505	54	8	136	864	668	1046
Zm00001d005795	chr2	188910705	188919424	-	Zm00001d005795	Zm00001d005795_T001;Zm00001d005795_T002	GO:0005634(nucleus);GO:0005737(cytoplasm);GO:0005829(cytosol);GO:0009737(response to abscisic acid);GO:0009788(negative regulation of abscisic acid-activated signaling pathway);GO:0016567(protein ubiquitination);GO:0061630(ubiquitin protein ligase activity);GO:0061630(ubiquitin protein ligase activity)	NA	K16274	EC:2.3.2.27	Protein binding protein	protein_coding	8.95865	6.6041	8.78065	8.33586	7.66144	9.07134	14.4071	7.12954	15.6267	4.22468	8.95504	7.70765	64.3516	44.0338	61.629	15.9841	20.4487	63.0781	686	516	690	524	464	717	1088	647	1327	319	903	735	5784	2747	5999	1540	1639	6015
Zm00001d005841	chr2	190556326	190557054	-	bHLH-transcription factor 20	Zm00001d005841_T001	GO:0001228(DNA-binding transcription activator activity, RNA polymerase II-specific);GO:0005634(nucleus);GO:0045944(positive regulation of transcription by RNA polymerase II);GO:0046983(protein dimerization activity)	NA	NA	NA	Transcription factor HEC2	protein_coding	0.655898	0.659987	0.083168	7.4631	12.9182	35.6588	0.129798	0.696347	1.23291	0.08733	1.1352	0.677247	3.24184	1.73016	12.4316	1.96027	3.55378	3.05812	28	29	4	257	428	1542	6	35	58	4	63	36	160	60	663	104	156	160
Zm00001d005888	chr2	191778849	191782862	+	HSF-transcription factor 1	Zm00001d005888_T001;Zm00001d005888_T002	GO:0000978(RNA polymerase II cis-regulatory region sequence-specific DNA binding);GO:0003677(DNA binding);GO:0003700(DNA-binding transcription factor activity);GO:0005634(nucleus);GO:0006355(regulation of transcription, DNA-templated);GO:0034605(cellular response to heat);GO:0042025(host cell nucleus);GO:0043565(sequence-specific DNA binding);GO:0043618(regulation of transcription from RNA polyme…	NA	K09419	NA	Heat stress transcription factor B-3	protein_coding	0.837675	0.575076	1.04955	20.336	17.3664	40.1699	14.5379	3.27661	13.855	0.0001	1.39344	1.16905	5.90979	2.2286	4.38992	4.44688	9.47437	63.0107	80	56	103	1590	1307	3949	1366	370	1464	0	175	139	662	174	532	534	945	7479
Zm00001d005920	chr2	192762349	192766625	-	carbonic anhydrase4	Zm00001d005920_T001;Zm00001d005920_T002;Zm00001d005920_T003;Zm00001d005920_T004;Zm00001d005920_T005;Zm00001d005920_T006	GO:0004089(carbonate dehydratase activity);GO:0005737(cytoplasm);GO:0008270(zinc ion binding);GO:0009440(cyanate catabolic process);GO:0010037(response to carbon dioxide);GO:0010119(regulation of stomatal movement);GO:0015976(carbon utilization);GO:0016829(lyase activity);GO:0016829(lyase activity)	00910(Nitrogen metabolism);00910(Nitrogen metabolism)	K01673	EC:4.2.1.1	carbonic anhydrase4	protein_coding	2.38363	5.17079	3.0524	11.9525	13.305	22.2615	9.59293	34.8066	5.72131	33.4436	36.894	45.6871	112.358	55.7226	89.0957	95.6601	119.341	142.067	288	638	379	1183	1269	2771	1141	4969	766	3969	5858	6859	15906	5477	13659	14518	15058	21338
Zm00001d005989	chr2	194858082	194858342	+	Zm00001d005989	Zm00001d005989_T001	GO:0016020(membrane);GO:0016021(integral component of membrane)	NA	NA	NA		protein_coding	0.290058	1.83644	0.700357	1.00605	0.115953	0.762505	3.54514	2.08765	0.533859	24.9432	28.5507	35.5916	8.45361	7.78654	10.0065	5.89196	7.39552	17.5672	5	29	11	13	2	12	53	38	9	369	564	665	149	96	191	112	117	329
Zm00001d006010	chr2	195228750	195230170	+	Zm00001d006010	Zm00001d006010_T001	NA	NA	NA	NA		protein_coding	0.972973	0.496054	0.464754	4.14113	2.88098	0.591705	9.14796	0.853808	3.90599	0.823097	4.45148	2.85222	0.0001	0.0001	0.0001	0.0001	0.704439	0.063541	67	35	33	234	157	42	620	70	298	56	403	245	0	0	0	0	51	6
Zm00001d006033	chr2	195811241	195819078	+	Zm00001d006033	Zm00001d006033_T001;Zm00001d006033_T002;Zm00001d006033_T003;Zm00001d006033_T004;Zm00001d006033_T005;Zm00001d006033_T006;Zm00001d006033_T007;Zm00001d006033_T008;Zm00001d006033_T009;Zm00001d006033_T010;Zm00001d006033_T011;Zm00001d006033_T012;Zm00001d006033_T013;Zm00001d006033_T014;Zm00001d006033_T015;Zm00001d006033_T016;Zm00001d006033_T017;Zm00001d006033_T018;Zm00001d006033_T019;Zm00001d006033_T020…	GO:0003824(catalytic activity);GO:0004672(protein kinase activity);GO:0005516(calmodulin binding);GO:0005524(ATP binding);GO:0006099(tricarboxylic acid cycle);GO:0006468(protein phosphorylation);GO:0006952(defense response);GO:0008964(phosphoenolpyruvate carboxylase activity);GO:0009607(response to biotic stimulus);GO:0015977(carbon fixation);GO:0016020(membrane);GO:0016021(integral component of …	NA	K08472	NA	Inactive LRR receptor-like serine/threonine-protein kinase BIR2	protein_coding	5.24798	5.41937	5.19628	2.91364	5.21046	3.80906	2.7417	4.55283	4.20093	0.252137	0.240618	0.221879	1.41437	1.02926	1.15174	0.602762	0.168945	0.678803	2078	2188	2113	953	1629	1557	1072	2134	1847	99	128	111	657	332	578	301	71	336
Zm00001d006099	chr2	198147947	198155511	-	Zm00001d006099	Zm00001d006099_T001	GO:0016020(membrane);GO:0016021(integral component of membrane)	NA	NA	NA		protein_coding	1.15561	1.08089	1.78809	0.460615	0.408272	0.514063	0.847478	0.926547	0.738534	0.163399	0.137194	0.171337	0.015665	0.0001	0.030596	0.0001	0.078152	0.16626	393	376	625	129	110	181	285	374	279	55	62	73	7	0	14	0	28	71
Zm00001d006122	chr2	199207550	199208441	-	Zm00001d006122	Zm00001d006122_T001	NA	NA	NA	NA		protein_coding	14.3589	17.3513	16.9444	32.5606	75.9425	26.4386	28.7146	14.8278	34.471	0.0001	0.605476	0.857797	16.5422	20.9815	13.3273	1.13567	0.196247	1.76037	654	807	792	1217	2733	1244	1290	800	1743	0	37	49	886	780	773	66	10	100
Zm00001d006133	chr2	199509522	199514949	-	Zm00001d006133	Zm00001d006133_T001;Zm00001d006133_T002	GO:0006637(acyl-CoA metabolic process);GO:0016853(isomerase activity);GO:0047617(acyl-CoA hydrolase activity);GO:0047617(acyl-CoA hydrolase activity)	NA	NA	NA	Thioesterase/thiol ester dehydrase-isomerase superfamily protein	protein_coding	3.34785	2.79838	3.47075	20.3963	23.2695	24.4182	7.53015	2.96635	8.40232	1.786	3.78298	2.63826	12.2863	7.37781	12.8284	10.8969	11.2096	32.3872	418	357	445	2090	2296	3148	928	439	1165	220	623	411	1803	752	2038	1714	1466	5041
Zm00001d006144	chr2	199708136	199709176	-	Zm00001d006144	Zm00001d006144_T001	GO:0008168(methyltransferase activity);GO:0016740(transferase activity);GO:0032259(methylation)	NA	NA	NA	S-adenosyl-L-methionine-dependent methyltransferases superfamily protein	protein_coding	0.357148	0.441786	1.2782	0.09323	0.202655	0.764162	0.599418	0.628414	2.10327	2.69479	3.96636	7.62723	1.81171	0.490933	2.67188	9.38663	9.98442	15.6696	22	27	79	5	10	48	36	45	140	159	313	569	128	24	204	707	626	1168
Zm00001d006193	chr2	201255021	201257277	-	Zm00001d006193	Zm00001d006193_T001	GO:0004497(monooxygenase activity);GO:0005506(iron ion binding);GO:0016020(membrane);GO:0016021(integral component of membrane);GO:0016491(oxidoreductase activity);GO:0016705(oxidoreductase activity, acting on paired donors, with incorporation or reduction of molecular oxygen);GO:0016709(oxidoreductase activity, acting on paired donors, with incorporation or reduction of molecular oxygen, NAD(P)H…	NA	NA	NA	cytochrome P450 family 78 subfamily A polypeptide 8	protein_coding	2.26435	0.672031	3.99249	0.075205	0.250483	0.0001	4.86435	0.734118	23.6766	15.6557	43.3052	49.0373	0.653312	0.187976	1.34781	177.494	198.667	8.56077	276	84	500	8	25	0	585	106	3202	1879	6953	7445	94	19	209	27242	25353	1301
Zm00001d006198	chr2	201392406	201400007	+	Zm00001d006198	Zm00001d006198_T001;Zm00001d006198_T002;Zm00001d006198_T003;Zm00001d006198_T004	GO:0005622(intracellular);GO:0005634(nucleus);GO:0006355(regulation of transcription, DNA-templated);GO:0008270(zinc ion binding);GO:0009640(photomorphogenesis);GO:0009640(photomorphogenesis)	NA	NA	NA	B-box zinc finger protein 19	protein_coding	7.37434	5.84181	5.03979	88.1718	96.4652	143.417	24.9459	12.7639	31.86	5.02329	3.7672	4.82816	68.2173	17.927	47.0766	50.4975	30.9519	74.8614	655	529	460	6416	6760	13130	2183	1342	3136	440	441	534	7108	1298	5312	5641	2875	8275
Zm00001d006300	chr2	204058630	204070381	-	Zm00001d006300	Zm00001d006300_T001	GO:0003697(single-stranded DNA binding);GO:0005524(ATP binding);GO:0006298(mismatch repair);GO:0007131(reciprocal meiotic recombination);GO:0016887(ATPase activity);GO:0032300(mismatch repair complex)	NA	NA	NA	MUTL protein homolog 3	protein_coding	5.66764	5.50343	6.54707	4.05964	6.59786	4.56178	3.33797	4.63746	4.10044	2.08547	1.17654	1.39306	0.632153	0.529534	1.07152	0.104025	0.010875	0.503292	1045	1036	1240	615	962	869	608	1013	840	379	286	321	137	80	252	25	3	116
Zm00001d006368	chr2	205866818	205869797	-	Zm00001d006368	Zm00001d006368_T001;Zm00001d006368_T002;Zm00001d006368_T003	GO:0006511(ubiquitin-dependent protein catabolic process);GO:0016020(membrane);GO:0016021(integral component of membrane);GO:0016567(protein ubiquitination);GO:0061630(ubiquitin protein ligase activity);GO:0061630(ubiquitin protein ligase activity)	NA	NA	NA	NEP1-interacting protein-like 1	protein_coding	8.10179	5.35624	9.06132	7.24777	9.80788	12.8171	23.5419	8.02178	15.2421	46.8263	74.1018	72.6518	24.1135	22.7024	49.5331	71.0562	44.6779	43.7892	624	421	717	458	597	1020	1789	732	1304	3552	7520	6971	2182	1426	4854	6893	3604	4204
Zm00001d006402	chr2	206603849	206617133	-	Zm00001d006402	Zm00001d006402_T001;Zm00001d006402_T002;Zm00001d006402_T003;Zm00001d006402_T004	GO:0000287(magnesium ion binding);GO:0009522(photosystem I);GO:0009579(thylakoid);GO:0015977(carbon fixation);GO:0015979(photosynthesis);GO:0016020(membrane);GO:0016021(integral component of membrane);GO:0016984(ribulose-bisphosphate carboxylase activity);GO:0016984(ribulose-bisphosphate carboxylase activity)	NA	NA	NA	Ribulose bisphosphate carboxylase large chain	protein_coding	0.593795	6.2306	15.3793	28.2389	15.7243	24.9109	17.9171	12.3098	12.3335	239.733	93.0506	103.885	67.6818	40.485	30.7791	37.8836	39.7299	21.4058	322	3438	8534	12528	6718	13906	9556	7884	7401	127620	66277	69965	42991	17849	21172	25796	22493	14426
Zm00001d006421	chr2	207451897	207463190	-	Zm00001d006421	Zm00001d006421_T001;Zm00001d006421_T002	NA	NA	NA	NA		protein_coding	61.0665	58.3007	49.6249	11.5728	21.3766	21.6056	52.8903	46.2048	38.7755	3.24469	45.7368	27.5548	4.34195	6.57575	3.42554	6.00493	4.86661	3.03721	2704	2636	2256	421	749	989	2310	2425	1907	142	2669	1521	227	238	193	336	227	168
Zm00001d006446	chr2	208457127	208458693	-	salmon silk2	Zm00001d006446_T001	GO:0008194(UDP-glycosyltransferase activity);GO:0016740(transferase activity);GO:0016757(transferase activity, transferring glycosyl groups);GO:0016758(transferase activity, transferring hexosyl groups);GO:0043231(intracellular membrane-bounded organelle);GO:0080043(quercetin 3-O-glucosyltransferase activity);GO:0080044(quercetin 7-O-glucosyltransferase activity)	NA	NA	NA	salmon silk2	protein_coding	42.4524	93.0415	52.4805	0.374091	1.13173	0.698717	5.48909	39.2575	5.0777	26.8291	42.2813	27.5494	0.0001	0.0001	0.0001	1.05638	0.866682	2.38463	3618	8093	4591	27	77	62	462	3964	481	2252	4748	2925	0	0	0	114	78	254
Zm00001d006467	chr2	209132700	209135945	-	adenosine 5'-phosphosulfate reductase-like2	Zm00001d006467_T001;Zm00001d006467_T002	GO:0003824(catalytic activity);GO:0004604(phosphoadenylyl-sulfate reductase (thioredoxin) activity);GO:0005623(cell);GO:0016671(oxidoreductase activity, acting on a sulfur group of donors, disulfide as acceptor);GO:0019344(cysteine biosynthetic process);GO:0019419(sulfate reduction);GO:0045454(cell redox homeostasis);GO:0055114(oxidation-reduction process);GO:0055114(oxidation-reduction process)	00920(Sulfur metabolism);00920(Sulfur metabolism)	K05907	EC:1.8.4.9	adenosine 5'-phosphosulfate reductase-like2	protein_coding	70.154	31.6606	41.9539	53.7801	46.9472	33.2944	15.6621	31.1642	29.8138	7.40884	61.3186	36.1578	119.004	68.5708	95.2302	280.921	549.328	88.9953	7046	3246	4325	4434	3728	3454	1553	3709	3325	733	8115	4525	14044	5617	12170	35538	57779	11143
Zm00001d006488	chr2	209759336	209765334	+	Zm00001d006488	Zm00001d006488_T001	NA	NA	NA	NA	BNR/Asp-box repeat family protein	protein_coding	1.56841	1.26992	0.814093	2.41197	3.45111	3.11799	3.93687	1.21828	3.6778	3.13631	5.56562	6.36894	12.9706	8.16848	13.0345	11.5965	9.41434	54.0636	175	145	94	221	305	360	434	161	456	345	818	885	1700	743	1850	1629	1100	7516
Zm00001d006521	chr2	210455427	210458297	-	Zm00001d006521	Zm00001d006521_T001;Zm00001d006521_T002	GO:0016020(membrane);GO:0016021(integral component of membrane);GO:0016021(integral component of membrane)	NA	NA	NA		protein_coding	5.94792	4.23876	3.48333	48.5458	52.9557	46.2172	18.7953	9.86269	17.1616	1.0166	2.24428	1.88606	3.79467	6.26166	8.04319	1.61471	0.973628	1.83498	337	246	203	2252	2365	2697	1049	661	1077	57	168	133	252	289	579	115	58	130
Zm00001d006534	chr2	210624205	210626124	+	Zm00001d006534	Zm00001d006534_T001;Zm00001d006534_T002	GO:0016020(membrane);GO:0016021(integral component of membrane);GO:0016021(integral component of membrane)	NA	NA	NA		protein_coding	4.32744	4.01259	2.49917	13.8489	10.1606	15.8252	14.8043	6.96895	19.1626	0.572193	1.74544	1.94198	5.98767	3.64987	7.35467	2.00186	1.80458	2.04632	268	253	159	700	495	1006	899	509	1309	36	142	150	434	184	577	156	117	158
Zm00001d006630	chr2	212957241	212960644	-	Zm00001d006630	Zm00001d006630_T001	GO:0005504(fatty acid binding);GO:0005739(mitochondrion);GO:0006631(fatty acid metabolic process);GO:0009570(chloroplast stroma);GO:0009941(chloroplast envelope);GO:0016020(membrane);GO:0016021(integral component of membrane);GO:0016853(isomerase activity);GO:0016872(intramolecular lyase activity)	NA	NA	NA	Chalcone isomerase	protein_coding	23.9965	46.0094	23.0079	2.05048	2.45066	2.57803	3.88943	22.0733	4.1537	7.34261	3.21952	3.0306	0.101254	0.0001	0.074905	0.455056	0.497362	0.373128	1894	3706	1864	133	153	211	303	2064	364	571	335	298	10	0	8	46	42	37
Zm00001d006677	chr2	214086849	214088343	-	BZR-transcription factor 7	Zm00001d006677_T001	GO:0003700(DNA-binding transcription factor activity);GO:0006351(transcription, DNA-templated);GO:0006355(regulation of transcription, DNA-templated);GO:0009742(brassinosteroid mediated signaling pathway)	NA	NA	NA	Protein BRASSINAZOLE-RESISTANT 1	protein_coding	7.03275	4.77492	7.35878	3.17188	5.65647	2.73726	13.9892	4.81331	30.0949	1.10053	2.16387	1.31335	0.424911	0.211845	0.527726	0.308794	0.164628	0.375236	527	366	566	196	335	212	1035	428	2503	82	214	123	38	13	51	30	13	36
Zm00001d006680	chr2	214127131	214130597	+	Zm00001d006680	Zm00001d006680_T001	GO:0000166(nucleotide binding);GO:0000492(box C/D snoRNP assembly);GO:0000812(Swr1 complex);GO:0003678(DNA helicase activity);GO:0004003(GO_0004003);GO:0004386(helicase activity);GO:0005524(ATP binding);GO:0005634(nucleus);GO:0006338(chromatin remodeling);GO:0006357(regulation of transcription by RNA polymerase II);GO:0016573(histone acetylation);GO:0016787(hydrolase activity);GO:0031011(Ino80 co…	NA	K11338	EC:3.6.4.12	P-loop containing nucleoside triphosphate hydrolases superfamily protein	protein_coding	1.99233	1.93041	0.978688	3.3679	4.74411	2.14559	18.5804	4.29397	16.8964	1.02902	7.29816	1.93782	15.3455	7.4137	10.3074	0.560046	1.90613	3.46194	211	209	107	293	397	235	1937	538	1982	108	1017	256	1906	639	1386	75	211	456
Zm00001d006699	chr2	214602481	214605127	-	Zm00001d006699	Zm00001d006699_T001	GO:0005783(endoplasmic reticulum);GO:0006486(protein glycosylation);GO:0016020(membrane);GO:0016021(integral component of membrane);GO:0030968(endoplasmic reticulum unfolded protein response)	NA	NA	NA	Ribosome associated membrane protein RAMP4	protein_coding	0.842606	0.261048	0.343362	6.74291	6.47292	13.4126	0.942487	0.994721	1.11581	10.8699	7.14197	7.6738	34.462	16.6639	18.5392	8.57629	8.21367	8.3963	36	12	15	233	216	583	40	50	53	450	396	402	1703	572	992	455	362	440
Zm00001d006753	chr2	215957135	215959705	-	Zm00001d006753	Zm00001d006753_T001;Zm00001d006753_T002;Zm00001d006753_T003;Zm00001d006753_T004;Zm00001d006753_T005	GO:0005737(cytoplasm);GO:0016881(acid-amino acid ligase activity);GO:0016881(acid-amino acid ligase activity)	NA	NA	NA	Indole-3-acetic acid amido synthetase	protein_coding	0.193977	0.0504334	0.147174	5.38432	10.4566	3.22691	0.0520907	0.0714966	0.248525	0.0894628	0.587836	0.173043	3.72215	0.479112	1.59636	0.020434	0.401593	3.26112	29	8	23	647	1208	487	8	13	41	13	114	32	640	59	297	4	62	595
Zm00001d006875	chr2	218327505	218332462	-	alanine aminotransferase10	Zm00001d006875_T001	GO:0003824(catalytic activity);GO:0004021(L-alanine:2-oxoglutarate aminotransferase activity);GO:0008483(transaminase activity);GO:0009058(biosynthetic process);GO:0016740(transferase activity);GO:0030170(pyridoxal phosphate binding)	00220(Arginine biosynthesis);00250(Alanine, aspartate and glutamate metabolism);00710(Carbon fixation in photosynthetic organisms)	K00814	EC:2.6.1.2	alanine aminotransferase10	protein_coding	9.16611	35.7381	13.9102	0.0001	0.187633	0.0001	0.43072	42.7737	0.348724	30.6079	21.0415	11.7396	2.80857	1.3042	2.34384	0.598756	0.565414	0.257371	1138	4527	1772	0	19	0	53	6289	49	3741	3441	1815	410	132	371	94	74	40
Zm00001d006880	chr2	218463970	218466465	-	Zm00001d006880	Zm00001d006880_T001	GO:0004462(lactoylglutathione lyase activity);GO:0005737(cytoplasm);GO:0019243(methylglyoxal catabolic process to D-lactate via S-lactoyl-glutathione)	NA	NA	NA	glyoxalase I homolog	protein_coding	0.0001	0.0001	0.0001	0.0001	0.0001	0.0001	0.083872	0.0001	0.065244	0.714287	0.747051	0.571015	3.49301	1.80222	4.11563	1.43002	0.556926	0.776009	0	0	0	0	0	0	7	0	6	55	77	56	319	114	406	140	46	75
Zm00001d006900	chr2	219013866	219017858	-	Zm00001d006900	Zm00001d006900_T001;Zm00001d006900_T002;Zm00001d006900_T003;Zm00001d006900_T004;Zm00001d006900_T005;Zm00001d006900_T006;Zm00001d006900_T007;Zm00001d006900_T008;Zm00001d006900_T009;Zm00001d006900_T010;Zm00001d006900_T011	GO:0003824(catalytic activity);GO:0003849(3-deoxy-7-phosphoheptulonate synthase activity);GO:0008652(cellular amino acid biosynthetic process);GO:0009073(aromatic amino acid family biosynthetic process);GO:0009423(chorismate biosynthetic process);GO:0009507(chloroplast);GO:0009536(plastid);GO:0016740(transferase activity);GO:0016740(transferase activity)	00400(Phenylalanine, tyrosine and tryptophan biosynthesis);00400(Phenylalanine, tyrosine and tryptophan biosynthesis)	K01626	EC:2.5.1.54	Phospho-2-dehydro-3-deoxyheptonate aldolase 2 chloroplastic	protein_coding	13.751	10.1253	10.8389	1.74508	3.19274	1.24438	1.44341	11.0415	0.525795	6.75259	28.9112	16.2192	0.826842	0.189653	0.926505	6.35801	40.8584	8.94857	3084	2319	2496	323	567	291	322	2934	133	1493	8539	4530	220	36	268	1797	9591	2501
Zm00001d006929	chr2	219600960	219605500	+	Zm00001d006929	Zm00001d006929_T001	GO:0004856(xylulokinase activity);GO:0005737(cytoplasm);GO:0005829(cytosol);GO:0005975(carbohydrate metabolic process);GO:0005997(xylulose metabolic process);GO:0016301(kinase activity);GO:0016310(phosphorylation);GO:0016773(phosphotransferase activity, alcohol group as acceptor);GO:0042732(D-xylose metabolic process);GO:0046835(carbohydrate phosphorylation)	NA	NA	NA	xylulose kinase-2	protein_coding	9.23924	6.28437	5.78116	9.88247	11.3925	10.1787	12.6913	6.66544	13.7954	6.7316	11.1318	8.82809	4.49137	2.44892	5.90072	1.03902	1.75542	3.81087	1199	833	771	1053	1169	1364	1625	1025	1987	861	1904	1428	685	260	975	170	239	617
Zm00001d007018	chr2	220221028	220221620	+	Zm00001d007018	Zm00001d007018_T001	NA	NA	NA	NA		protein_coding	0.585456	0.57907	0.620319	7.4894	3.35294	6.15617	1.27633	1.82414	2.99851	11.5656	21.5379	17.507	49.4215	42.2642	77.2131	23.3008	6.31808	11.4605	20	21	22	210	91	217	43	74	114	388	967	743	1978	1174	3346	1000	226	487
Zm00001d007084	chr2	221914642	221915449	+	Zm00001d007084	Zm00001d007084_T001	GO:0000786(nucleosome);GO:0003677(DNA binding);GO:0005634(nucleus);GO:0005694(chromosome);GO:0006334(nucleosome assembly);GO:0046982(protein heterodimerization activity)	NA	K11252	NA	Histone H2B	protein_coding	0.400069	0.649468	0.551294	0.236727	0.282368	0.345243	0.746634	0.562163	0.156394	77.8614	105.676	155.178	46.8205	34.423	53.5617	90.1654	121.457	309.476	19	31	27	10	11	17	35	31	9	3558	6461	8970	2553	1303	3163	5270	5902	17901
Zm00001d007187	chr2	224120990	224123225	+	Zm00001d007187	Zm00001d007187_T001;Zm00001d007187_T002;Zm00001d007187_T003	NA	NA	NA	NA	hydroxyproline-rich glycoprotein family protein	protein_coding	0.0001	0.0001	0.0692213	0.355013	0.221397	0.118914	1.69068	0.0001	0.123937	1.53712	4.00221	3.69627	61.511	38.2496	39.7458	12.0371	5.56954	77.2059	0	0	8	31	19	13	177	0	15	160	558	487	7637	3296	5344	1602	617	10170
Zm00001d007226	chr2	225140960	225145261	+	Zm00001d007226	Zm00001d007226_T002;Zm00001d007226_T004;Zm00001d007226_T005	GO:0005515(protein binding);GO:0005739(mitochondrion);GO:0005739(mitochondrion)	NA	NA	NA		protein_coding	1.52552	1.2434	1.52769	0.276173	0.34412	0.358522	2.39292	1.6081	1.88718	1.54379	1.97982	0.916663	0.804175	0.510538	0.865621	0.490152	0.259457	0.449566	278	232	287	42	50	68	432	348	382	279	477	209	173	76	201	114	50	103
Zm00001d007228	chr2	225207322	225209334	+	Zm00001d007228	Zm00001d007228_T001	GO:0006629(lipid metabolic process);GO:0016020(membrane);GO:0016021(integral component of membrane);GO:0016717(oxidoreductase activity, acting on paired donors, with oxidation of a pair of donors resulting in the reduction of molecular oxygen to two molecules of water);GO:0055114(oxidation-reduction process)	NA	NA	NA	Omega-3 fatty acid desaturase	protein_coding	221.491	439.095	376.38	18.6564	61.0381	36.5568	1.58004	251.497	3.25103	156.808	101.983	140.872	25.2668	8.91577	15.987	7.9344	7.62478	3.5444	21531	43572	37556	1489	4690	3670	152	28966	351	15012	13064	17062	2887	707	1978	972	777	430
Zm00001d007240	chr2	225519590	225524863	+	GRMZM2G033962	Zm00001d007240_T001	GO:0000160(phosphorelay signal transduction system);GO:0005515(protein binding);GO:0005634(nucleus);GO:0048579(negative regulation of long-day photoperiodism, flowering)	NA	NA	NA	Two-component response regulator-like APRR3	protein_coding	7.42312	6.12665	9.42885	0.911927	1.79755	2.12425	1.94926	3.75164	1.4441	1.94843	8.37557	12.7102	2.32562	1.19829	7.79934	7.7153	7.70133	0.768604	1015	856	1324	103	195	300	263	608	220	263	1509	2166	374	134	1357	1329	1103	132
Zm00001d007245	chr2	225571153	225574882	-	Zm00001d007245	Zm00001d007245_T001;Zm00001d007245_T002	NA	NA	NA	NA		protein_coding	13.4488	12.7534	18.2749	8.73029	17.7973	13.1934	32.8815	11.4968	12.3644	0.776325	5.96863	3.72111	0.986677	0.671713	1.43278	0.426637	0.725139	0.274803	706	684	984	377	739	715	1702	715	721	41	413	244	61	29	96	29	41	19
Zm00001d007319	chr2	228322442	228327030	+	Zm00001d007319	Zm00001d007319_T001;Zm00001d007319_T002;Zm00001d007319_T003	GO:0004252(serine-type endopeptidase activity);GO:0006508(proteolysis);GO:0008233(peptidase activity);GO:0008236(serine-type peptidase activity);GO:0016787(hydrolase activity);GO:0016787(hydrolase activity)	NA	NA	NA	Subtilisin-like serine endopeptidase family protein	protein_coding	1.0967	0.801035	1.12108	0.121438	0.727753	0.348147	2.71449	0.4869	6.05492	17.8761	24.231	18.2771	1.87939	1.3395	13.9252	30.7547	18.3301	0.0644248	162	121	170	15	85	53	395	85	990	2591	4700	3353	325	161	2608	5702	2827	13
Zm00001d007329	chr2	228732533	228737268	+	WRKY-transcription factor 108	Zm00001d007329_T001	GO:0003677(DNA binding);GO:0003700(DNA-binding transcription factor activity);GO:0005634(nucleus);GO:0006355(regulation of transcription, DNA-templated);GO:0043565(sequence-specific DNA binding)	NA	NA	NA	Probable WRKY transcription factor 75	protein_coding	0.063626	0.0001	0.0001	9.78857	5.93602	17.3707	11.7893	1.90008	7.91417	0.264227	0.0001	0.0001	1.96366	2.62776	1.05934	0.068559	0.0001	0.841956	4	0	0	467	273	1042	676	131	510	16	0	0	134	125	79	6	0	61
Zm00001d007349	chr2	229333468	229334468	-	Zm00001d007349	Zm00001d007349_T001	GO:0001709(cell fate determination)	NA	NA	NA	Expressed protein; protein	protein_coding	0.0001	0.0001	0.0001	0.544801	5.43325	2.48868	0.860912	0.084127	0.534979	0.0001	0.42246	0.0001	50.4031	33.4087	53.1569	0.942913	2.36426	1.67522	0	0	0	17	162	97	33	4	23	0	21	0	2235	1028	2552	45	94	79
Zm00001d007382	chr2	230338653	230341206	+	bHLH-transcription factor 96	Zm00001d007382_T001	GO:0046983(protein dimerization activity)	NA	NA	NA	Transcription factor ICE1	protein_coding	5.06751	6.75775	2.37005	15.9134	5.51461	5.63234	0.520233	7.01746	0.342836	1.15054	0.578094	0.614618	2.16915	1.4744	1.64999	0.10207	0.293135	0.148542	572	779	275	2110	508	809	58	939	43	128	86	87	201	132	193	15	35	21
Zm00001d007485	chr2	232774838	232777828	-	Zm00001d007485	Zm00001d007485_T001	GO:0005515(protein binding);GO:0016020(membrane);GO:0016021(integral component of membrane);GO:0016301(kinase activity);GO:0016310(phosphorylation)	NA	NA	NA	LRR receptor-like serine/threonine-protein kinase GSO2	protein_coding	0.0001	0.0001	0.0001	0.0001	0.0001	0.0001	0.0001	0.0001	0.0001	0.663539	1.00427	1.12636	1.74829	1.74046	3.92907	0.397841	0.607468	5.70045	0	0	0	0	0	0	0	0	0	113	228	242	353	244	859	87	110	1221
Zm00001d007517	chr2	233654880	233658387	-	Zm00001d007517	Zm00001d007517_T001;Zm00001d007517_T002;Zm00001d007517_T003;Zm00001d007517_T004	GO:0004252(serine-type endopeptidase activity);GO:0006508(proteolysis);GO:0008233(peptidase activity);GO:0008236(serine-type peptidase activity);GO:0016787(hydrolase activity);GO:0016787(hydrolase activity)	NA	NA	NA	Subtilisin-like serine endopeptidase family protein	protein_coding	113.039	55.8097	100.306	5.96688	11.2655	5.96108	19.8556	36.5911	17.08	45.5285	74.797	94.7417	16.8977	11.4431	31.3373	8.53162	7.96856	3.4365	15714	7920	14314	681	1239	856	2724	6028	2636	6234	13702	16410	2762	1298	5544	1495	1161	596
Zm00001d007572	chr2	235053907	235060019	-	CRM family member3	Zm00001d007572_T001	GO:0000373(Group II intron splicing);GO:0003723(RNA binding);GO:0005739(mitochondrion);GO:0006397(mRNA processing);GO:0008380(RNA splicing);GO:0009507(chloroplast);GO:0009536(plastid);GO:0009570(chloroplast stroma)	NA	NA	NA	CRM family member3	protein_coding	12.0254	13.184	12.5614	0.620504	1.07638	0.719753	8.84308	10.0022	8.70973	11.3959	12.5796	9.29276	1.94262	2.00264	3.68447	0.050145	0.428557	2.82889	2101	2351	2253	89	149	130	1524	2070	1689	1961	2896	2023	399	286	819	12	79	617
Zm00001d007581	chr2	235123301	235124690	-	Zm00001d007581	Zm00001d007581_T001	GO:0005634(nucleus);GO:0005886(plasma membrane);GO:0009535(chloroplast thylakoid membrane);GO:0009658(chloroplast organization);GO:0009941(chloroplast envelope);GO:0010193(response to ozone);GO:0010287(plastoglobule);GO:0031977(thylakoid lumen);GO:0042742(defense response to bacterium)	NA	NA	NA	harpin binding protein1	protein_coding	99.5552	58.8046	111.101	47.6033	92.8744	111.362	77.1758	53.3109	76.3515	64.3585	51.1384	71.2706	26.3196	7.62048	25.5774	374.124	397.092	452.689	6774	4085	7760	2659	4995	7825	5181	4298	5767	4313	4585	6042	2105	423	2215	32066	28299	38401
Zm00001d007810	chr2	240071374	240073496	+	Zm00001d007810	Zm00001d007810_T001;Zm00001d007810_T002;Zm00001d007810_T003;Zm00001d007810_T004;Zm00001d007810_T005;Zm00001d007810_T006;Zm00001d007810_T007;Zm00001d007810_T008;Zm00001d007810_T009	GO:0000028(ribosomal small subunit assembly);GO:0003723(RNA binding);GO:0003735(structural constituent of ribosome);GO:0005840(ribosome);GO:0006412(translation);GO:0015935(small ribosomal subunit);GO:0022627(cytosolic small ribosomal subunit);GO:0022627(cytosolic small ribosomal subunit)	03010(Ribosome);03010(Ribosome)	K02958	NA	40S ribosomal protein S15-4	protein_coding	31.497	40.117	15.9127	6.7308	9.83892	7.12163	34.5702	33.7458	19.9481	6.07851	11.9697	5.62251	1.23573	1.63339	2.10131	2.54596	7.93303	9.49074	3068	3987	1593	541	760	719	3321	3894	2158	583	1537	685	142	130	262	313	811	1154
Zm00001d007858	chr2	241034298	241037375	+	Zm00001d007858	Zm00001d007858_T001	GO:0016491(oxidoreductase activity);GO:0055114(oxidation-reduction process)	NA	NA	NA	Pyridoxal reductase chloroplastic	protein_coding	105.311	89.8158	138.736	5.81478	7.12483	7.01584	57.2152	48.7072	71.189	168.076	162.453	188.185	27.8414	23.6606	54.2123	131.589	134.506	117.886	9832	8560	13296	446	526	677	5270	5388	7377	15454	19986	21891	3055	1802	6441	15476	13153	13722
Zm00001d007864	chr2	241250798	241252215	-	Zm00001d007864	Zm00001d007864_T001	NA	NA	NA	NA	Carbohydrate-binding X8 domain superfamily protein	protein_coding	2.60471	2.56686	3.31958	0.572248	0.45918	0.543278	2.8367	2.00196	3.07478	6.87201	4.40388	3.28835	1.088	1.19894	2.01508	0.0001	0.209285	0.73586	134	135	175	25	19	29	144	122	175	347	298	210	66	51	132	0	12	47
Zm00001d007871	chr2	241395955	241407519	+	Zm00001d007871	Zm00001d007871_T001;Zm00001d007871_T002;Zm00001d007871_T003;Zm00001d007871_T005;Zm00001d007871_T007;Zm00001d007871_T008;Zm00001d007871_T009	GO:0000793(condensed chromosome);GO:0005634(nucleus);GO:0006281(DNA repair);GO:0007129(synapsis);GO:0031573(intra-S DNA damage checkpoint);GO:0036297(interstrand cross-link repair);GO:0070182(DNA polymerase binding);GO:1990918(double-strand break repair involved in meiotic recombination);GO:1990918(double-strand break repair involved in meiotic recombination)	NA	K10891	NA		protein_coding	4.84967	6.12631	6.84182	4.37189	7.02164	8.24787	8.01473	7.25746	7.78891	0.0001	0.00975165	0.0575452	0.0748666	0.18977	0.188907	0.0433479	0.0266909	0.152898	1966	2537	2848	1456	2251	3454	3206	3487	3506	0	6	30	36	64	98	24	12	79
Zm00001d007901	chr2	242052645	242054040	-	Zm00001d007901	Zm00001d007901_T001	NA	NA	NA	NA	Cylicin-1	protein_coding	3.34776	1.49719	0.974089	5.9257	6.79437	11.1841	8.69094	1.47071	11.5939	4.10634	5.11499	5.39073	1.10813	0.725755	2.5145	4.63492	8.39613	85.2491	238	109	71	345	381	818	608	124	912	287	478	476	93	42	227	414	623	7525
Zm00001d007912	chr2	242356662	242362951	+	Zm00001d007912	Zm00001d007912_T001;Zm00001d007912_T002;Zm00001d007912_T003;Zm00001d007912_T005;Zm00001d007912_T007;Zm00001d007912_T009;Zm00001d007912_T010;Zm00001d007912_T012;Zm00001d007912_T013	GO:0000166(nucleotide binding);GO:0004672(protein kinase activity);GO:0004674(protein serine/threonine kinase activity);GO:0004683(calmodulin-dependent protein kinase activity);GO:0005509(calcium ion binding);GO:0005516(calmodulin binding);GO:0005524(ATP binding);GO:0005634(nucleus);GO:0005737(cytoplasm);GO:0006468(protein phosphorylation);GO:0009738(abscisic acid-activated signaling pathway);GO:…	04626(Plant-pathogen interaction);04626(Plant-pathogen interaction)	K13412	EC:2.7.11.1	Calcium-dependent protein kinase 20	protein_coding	4.63067	3.87854	4.9916	8.21635	11.903	11.3546	8.94913	6.32671	11.3854	1.02746	1.98649	1.93105	5.87879	4.1059	5.73938	2.20708	1.77189	2.70731	1635	1397	1807	2378	3318	4135	3113	2643	4455	359	925	850	2438	1183	2575	983	656	1191
Zm00001d007918	chr2	242408695	242410359	+	cytochrome P-450 20	Zm00001d007918_T001	GO:0004497(monooxygenase activity);GO:0005506(iron ion binding);GO:0010333(terpene synthase activity);GO:0016020(membrane);GO:0016021(integral component of membrane);GO:0016114(terpenoid biosynthetic process);GO:0016491(oxidoreductase activity);GO:0016705(oxidoreductase activity, acting on paired donors, with incorporation or reduction of molecular oxygen);GO:0016709(oxidoreductase activity, acti…	NA	NA	NA	cytochrome P-450 20	protein_coding	7.59087	7.80062	8.47293	9.11887	11.1068	9.95296	17.5748	5.68173	11.5885	5.92562	17.7688	19.233	3.72208	2.25719	7.90417	78.7744	98.0934	47.702	726	762	832	716	840	983	1658	644	1230	558	2239	2291	419	177	962	9487	9823	5686
Zm00001d007940	chr2	243480096	243481628	-	Zm00001d007940	Zm00001d007940_T001;Zm00001d007940_T002	GO:0003723(RNA binding);GO:0003743(translation initiation factor activity);GO:0003746(translation elongation factor activity);GO:0006412(translation);GO:0006413(translational initiation);GO:0006414(translational elongation);GO:0006452(translational frameshifting);GO:0043022(ribosome binding);GO:0045901(positive regulation of translational elongation);GO:0045905(positive regulation of translationa…	NA	K03263	NA	Eukaryotic translation initiation factor 5A-1	protein_coding	27.8844	23.923	24.2987	17.018	23.6244	27.3123	42.4686	35.103	38.6001	18.6615	20.2816	12.7752	7.38701	5.34179	6.81155	2.1968	3.12345	3.18156	1541	1350	1378	772	1033	1559	2315	2298	2367	1016	1477	880	481	241	480	154	181	221
Zm00001d007956	chr2	243996006	243999880	+	Zm00001d007956	Zm00001d007956_T001	NA	NA	NA	NA		protein_coding	0.053977	0.222597	0.266252	0.0001	0.0001	0.0001	0.0001	0.0001	0.0001	1.2895	1.68817	1.84452	0.545787	0.22249	1.51288	2.02068	1.60299	0.563631	7	27	32	0	0	0	0	0	0	146	256	265	74	21	222	293	193	81
Zm00001d008001	chr8	21268760	21273571	-	Zm00001d008001	Zm00001d008001_T001	NA	NA	NA	NA		lincRNA	0.0001	0.0001	0.0001	0.0001	0.0001	0.0001	0.0001	0.0001	0.0001	0.184917	0.416771	0.345099	1.67219	1.10105	0.603177	0.512946	1.02144	1.74986	0	0	0	0	0	0	0	0	0	38	114	89	406	186	159	134	221	450
Zm00001d008162	chr8	177287748	177288351	+	Zm00001d008162	Zm00001d008162_T001	NA	NA	NA	NA		lincRNA	0.0001	0.0001	0.0001	0.0001	0.0001	0.104991	0.0001	0.0001	0.0001	0.860399	2.03506	2.33311	6.72715	5.85738	5.08111	3.04321	1.19372	2.3181	0	0	0	0	0	4	0	0	0	30	94	101	275	166	225	133	44	101
Zm00001d008209	chr8	1238180	1242266	-	Zm00001d008209	Zm00001d008209_T001	GO:0000413(protein peptidyl-prolyl isomerization);GO:0003755(peptidyl-prolyl cis-trans isomerase activity);GO:0005737(cytoplasm);GO:0006457(protein folding);GO:0006979(response to oxidative stress);GO:0009535(chloroplast thylakoid membrane);GO:0009570(chloroplast stroma);GO:0009642(response to light intensity);GO:0009651(response to salt stress);GO:0009737(response to abscisic acid);GO:0009941(ch…	NA	NA	NA	Peptidyl-prolyl cis-trans isomerase	protein_coding	114.858	163.634	77.3905	13.3398	14.2009	19.2683	10.9534	91.1186	8.26777	82.5786	71.2028	64.1543	6.82675	4.17705	12.1468	1.26649	2.75561	12.5004	7809	11356	5401	745	763	1353	735	7340	624	5529	6379	5435	546	232	1051	109	197	1060
Zm00001d008273	chr8	3682734	3687115	-	Zm00001d008273	Zm00001d008273_T001	GO:0003824(catalytic activity);GO:0004553(hydrolase activity, hydrolyzing O-glycosyl compounds);GO:0005975(carbohydrate metabolic process);GO:0008152(metabolic process);GO:0016787(hydrolase activity);GO:0016798(hydrolase activity, acting on glycosyl bonds);GO:0030246(carbohydrate binding)	NA	NA	NA	Alpha-xylosidase 1	protein_coding	0.323506	0.172439	0.081583	22.9148	15.2296	18.0213	13.6124	2.77789	16.6897	0.023638	0.06721	0.183776	73.969	44.6978	28.9651	0.0001	0.0001	0.603705	52	29	14	2995	1917	2964	2139	525	2950	4	15	37	13840	5805	5869	0	0	120
Zm00001d008296	chr8	4472427	4473956	-	Zm00001d008296	Zm00001d008296_T001	GO:0009638(phototropism);GO:0016301(kinase activity);GO:0016310(phosphorylation)	NA	NA	NA	Phytochrome kinase substrate 1	protein_coding	1.66109	0.842735	0.716837	0.254472	0.584764	0.517358	0.214765	0.474753	0.713519	2.03211	4.40289	5.81838	2.18076	1.14909	2.08328	4.13269	3.17759	1.94443	146	76	65	19	41	47	19	50	70	176	510	637	226	83	233	458	293	213
Zm00001d008340	chr8	5789122	5793195	-	Zm00001d008340	Zm00001d008340_T001;Zm00001d008340_T002;Zm00001d008340_T003;Zm00001d008340_T004	GO:0006629(lipid metabolic process);GO:0008970(phospholipase A1 activity);GO:0016020(membrane);GO:0016021(integral component of membrane);GO:0016787(hydrolase activity);GO:0016787(hydrolase activity)	NA	NA	NA	alpha/beta-Hydrolases superfamily protein	protein_coding	27.4159	27.1221	17.2435	35.5486	36.7061	31.413	22.7071	13.7909	25.2011	20.1771	21.0056	27.4573	111.302	67.9803	53.9551	1.02169	1.02688	8.23538	5030	5080	3248	5353	5322	5951	4110	2998	5132	3646	5078	6276	23994	10172	12596	237	198	1884
Zm00001d008462	chr8	9350134	9352749	-	Zm00001d008462	Zm00001d008462_T001;Zm00001d008462_T002;Zm00001d008462_T003	GO:0000166(nucleotide binding);GO:0004672(protein kinase activity);GO:0004674(protein serine/threonine kinase activity);GO:0005524(ATP binding);GO:0006468(protein phosphorylation);GO:0016020(membrane);GO:0016021(integral component of membrane);GO:0016301(kinase activity);GO:0016310(phosphorylation);GO:0030247(polysaccharide binding);GO:0030247(polysaccharide binding)	NA	NA	NA	Cysteine-rich receptor-like protein kinase 37	protein_coding	13.9854	1.42282	4.81839	50.5408	66.6674	76.6469	110.092	25.2108	103.253	0.351719	1.39158	1.7696	4.148	2.56442	5.8042	6.32278	3.90266	3.66171	1926	200	682	5713	7256	10899	14956	4113	15780	48	253	304	672	288	1018	1098	564	629
Zm00001d008465	chr8	9362789	9378737	+	Zm00001d008465	Zm00001d008465_T001	GO:0000166(nucleotide binding);GO:0004672(protein kinase activity);GO:0004674(protein serine/threonine kinase activity);GO:0005524(ATP binding);GO:0006468(protein phosphorylation);GO:0016301(kinase activity);GO:0016310(phosphorylation)	NA	NA	NA	PR5-like receptor kinase	protein_coding	0.783578	0.551162	0.39762	8.22172	8.62209	10.3378	9.39232	2.40859	8.94075	0.0001	0.0001	0.075149	0.594498	0.300646	1.27066	0.15903	0.271916	0.387084	93	67	49	796	804	1259	1093	337	1170	0	0	12	83	29	191	24	34	57
Zm00001d008467	chr8	9610502	9621190	-	Zm00001d008467	Zm00001d008467_T001;Zm00001d008467_T002;Zm00001d008467_T003	GO:0004672(protein kinase activity);GO:0005524(ATP binding);GO:0006468(protein phosphorylation);GO:0016301(kinase activity);GO:0016310(phosphorylation);GO:0030247(polysaccharide binding);GO:0030247(polysaccharide binding)	NA	NA	NA	Cysteine-rich receptor-like protein kinase 37	protein_coding	13.386	3.23473	7.58353	79.8918	104.834	96.2921	124.635	36.1576	147.533	0.184586	1.35724	0.321444	0.214299	2.89336	3.92246	0.470291	0.946166	0.947422	2542	627	1479	12450	15733	18881	23349	8135	31094	35	341	77	49	449	949	113	189	225
Zm00001d008479	chr8	9828155	9828691	+	Zm00001d008479	Zm00001d008479_T001	GO:0004672(protein kinase activity);GO:0005524(ATP binding);GO:0006468(protein phosphorylation);GO:0016301(kinase activity);GO:0016310(phosphorylation)	NA	NA	NA	receptor-like kinase	protein_coding	1.02436	0.358778	0.185324	7.83565	10.2348	14.7013	13.6038	2.64695	7.17307	0.036591	0.609077	0.450633	4.12814	0.0001	3.78403	0.323146	0.536303	1.98652	32	12	6	199	250	469	414	97	246	2	25	18	150	0	149	13	18	77
Zm00001d008548	chr8	12671727	12672398	-	wound induced protein1	Zm00001d008548_T001	GO:0004867(serine-type endopeptidase inhibitor activity);GO:0005576(extracellular region);GO:0006508(proteolysis);GO:0008233(peptidase activity);GO:0010466(negative regulation of peptidase activity);GO:0010951(negative regulation of endopeptidase activity);GO:0030414(peptidase inhibitor activity)	NA	NA	NA	Bowman-Birk type wound-induced proteinase inhibitor WIP1	protein_coding	0.0001	0.329892	0.0001	77.7729	12.8015	61.1206	6.6311	0.08958	0.0001	1.6169	5.18626	5.30471	414.179	300.229	254.237	2.45729	3.96492	433.067	0	12	0	2133	339	2110	219	4	0	54	229	221	16264	8183	10812	104	139	18043
Zm00001d008587	chr8	13681436	13683379	+	Zm00001d008587	Zm00001d008587_T001	GO:0006541(glutamine metabolic process);GO:0016740(transferase activity);GO:0016787(hydrolase activity)	NA	NA	NA	Class I glutamine amidotransferase-like superfamily protein	protein_coding	0.151153	0.108813	0.156781	4.80431	6.82217	10.6847	1.14784	0.194981	0.592152	0.24858	0.768155	0.657429	63.5632	33.5325	8.92152	0.479104	0.697634	6.33957	16	12	17	393	537	1098	113	23	66	25	101	82	7433	2722	1130	61	73	787
Zm00001d008604	chr8	14284242	14291419	+	Zm00001d008604	Zm00001d008604_T001;Zm00001d008604_T002;Zm00001d008604_T003;Zm00001d008604_T004;Zm00001d008604_T005;Zm00001d008604_T006;Zm00001d008604_T007;Zm00001d008604_T008;Zm00001d008604_T009;Zm00001d008604_T010;Zm00001d008604_T011	GO:0006857(oligopeptide transport);GO:0015333(peptide:proton symporter activity);GO:0016020(membrane);GO:0016021(integral component of membrane);GO:0022857(transmembrane transporter activity);GO:0035672(oligopeptide transmembrane transport);GO:0035673(oligopeptide transmembrane transporter activity);GO:0055085(transmembrane transport);GO:1902600(proton transmembrane transport);GO:1904680(peptide …	NA	NA	NA	Protein NRT1/ PTR FAMILY 8.1	protein_coding	5.0617	2.58934	2.11858	16.7356	32.1667	51.4588	12.8282	3.46569	28.3477	1.28015	2.86389	2.72808	8.29002	8.35948	9.97323	0.947907	1.6132	6.21935	910	474	390	2463	4559	9528	2271	739	5643	228	679	612	1749	1225	2278	215	304	1391
Zm00001d008628	chr8	15223267	15228122	+	Zm00001d008628	Zm00001d008628_T001;Zm00001d008628_T002	GO:0000048(peptidyltransferase activity);GO:0005886(plasma membrane);GO:0006412(translation);GO:0006508(proteolysis);GO:0006520(cellular amino acid metabolic process);GO:0006536(glutamate metabolic process);GO:0006749(glutathione metabolic process);GO:0006751(glutathione catabolic process);GO:0016020(membrane);GO:0016021(integral component of membrane);GO:0019344(cysteine biosynthetic process);GO…	NA	NA	NA	Gamma-glutamyltranspeptidase 3	protein_coding	4.52837	1.43741	2.22085	0.644719	1.53702	2.37242	11.65	2.2378	15.7825	1.31697	4.47849	2.47678	0.4482	0.435023	0.877493	0.427363	2.0969	0.862241	664	216	334	79	178	360	1683	389	2564	191	865	453	78	53	164	79	322	158
Zm00001d008734	chr8	18247920	18249030	-	bZIP-transcription factor 122	Zm00001d008734_T001	GO:0003700(DNA-binding transcription factor activity);GO:0005634(nucleus);GO:0006355(regulation of transcription, DNA-templated);GO:0010017(red or far-red light signaling pathway);GO:0010099(regulation of photomorphogenesis);GO:0010114(response to red light);GO:0010218(response to far red light);GO:0043565(sequence-specific DNA binding)	04712(Circadian rhythm - plant)	K16241	NA	Putative bZIP transcription factor superfamily protein	protein_coding	15.1438	14.8421	20.0587	0.483217	3.1704	1.25488	8.98807	13.9444	8.38845	10.37	18.7864	20.005	9.79769	6.28627	6.03862	31.808	29.3779	34.6229	780	780	1060	21	129	67	457	850	480	526	1274	1283	593	264	396	2062	1583	2221
Zm00001d008749	chr8	18951758	18953833	-	barren inflorescence1	Zm00001d008749_T001;Zm00001d008749_T002;Zm00001d008749_T003;Zm00001d008749_T004	GO:0005515(protein binding);GO:0005634(nucleus);GO:0006351(transcription, DNA-templated);GO:0006355(regulation of transcription, DNA-templated);GO:0009734(auxin-activated signaling pathway);GO:0016020(membrane);GO:0016021(integral component of membrane);GO:0016021(integral component of membrane)	NA	NA	NA	barren inflorescence1	protein_coding	1.54249	1.25131	0.966963	5.85386	44.1707	5.35038	1.12273	1.39655	1.19786	1.77292	1.99494	2.78573	7.63322	4.62322	10.3302	3.43076	6.61937	3.25087	159	133	104	495	3588	570	117	171	139	180	271	358	923	389	1353	446	714	417
Zm00001d008779	chr8	19717269	19718855	-	Zm00001d008779	Zm00001d008779_T001	GO:0005515(protein binding)	NA	NA	NA	Leucine-rich repeat extensin-like protein 3	protein_coding	0.078871	0.648053	0.123022	0.0001	0.077945	0.053278	0.083355	0.602693	0.181794	2.4203	3.97525	4.28409	1.1415	0.663256	0.818813	0.462545	2.25988	1.28071	8	61	12	0	6	6	8	66	19	218	478	487	123	50	95	54	216	146
Zm00001d008810	chr8	21254507	21266662	+	Zm00001d008810	Zm00001d008810_T001	NA	NA	NA	NA		protein_coding	0.0001	0.0001	0.0001	0.0001	0.0001	0.143281	0.0001	0.0001	0.0001	0.251522	0.167778	0.252052	0.723835	0.714164	0.961084	0.778158	0.573804	1.37589	0	0	0	0	0	21	0	0	0	35	31	44	117	81	169	135	83	236
Zm00001d008812	chr8	21359783	21360919	+	C3H-transcription factor 347	Zm00001d008812_T001	GO:0046872(metal ion binding)	NA	NA	NA	C3H47 C3H type transcription factor	protein_coding	0.139907	0.351731	0.091924	9.12663	21.4632	7.42817	0.634927	1.36803	1.35263	0.551421	0.733578	0.804356	91.985	26.6226	20.6319	3.3028	15.6958	6.5213	10	24	7	489	1108	501	41	106	99	36	64	66	7057	1418	1715	272	1074	531
Zm00001d008815	chr8	21381514	21388543	+	Zm00001d008815	Zm00001d008815_T001;Zm00001d008815_T002	GO:0000166(nucleotide binding);GO:0000780(condensed nuclear chromosome, centromeric region);GO:0004672(protein kinase activity);GO:0004674(protein serine/threonine kinase activity);GO:0005524(ATP binding);GO:0005876(spindle microtubule);GO:0006468(protein phosphorylation);GO:0007052(mitotic spindle organization);GO:0016301(kinase activity);GO:0016310(phosphorylation);GO:0031616(spindle pole centr…	NA	K08850	EC:2.7.11.1	Putative aurora-related protein kinase family protein%3B Serine/threonine-protein kinase Eg2-like	protein_coding	0.488632	0.558652	0.59599	1.89126	1.46784	1.4353	0.957975	0.757853	1.27685	2.93316	2.14614	2.26523	13.4507	8.14613	7.53783	2.36426	2.37187	2.71707	40	46	50	126	95	121	77	73	115	233	228	228	1273	535	773	241	201	273
Zm00001d008816	chr8	21388425	21392149	-	Zm00001d008816	Zm00001d008816_T001;Zm00001d008816_T002	GO:0000166(nucleotide binding);GO:0003824(catalytic activity);GO:0003872(6-phosphofructokinase activity);GO:0005524(ATP binding);GO:0005737(cytoplasm);GO:0006002(fructose 6-phosphate metabolic process);GO:0006096(glycolytic process);GO:0008152(metabolic process);GO:0016301(kinase activity);GO:0016310(phosphorylation);GO:0016740(transferase activity);GO:0046872(metal ion binding);GO:0061615(glycol…	00010(Glycolysis / Gluconeogenesis);00030(Pentose phosphate pathway);00051(Fructose and mannose metabolism);00052(Galactose metabolism);03018(RNA degradation);03018(RNA degradation)	K00850	EC:2.7.1.11	ATP-dependent 6-phosphofructokinase 4 chloroplastic	protein_coding	12.6715	10.4711	12.1086	30.9025	52.5408	43.7566	24.732	10.1925	33.8243	3.08773	10.8119	11.2089	22.0124	12.1395	20.5792	75.4414	63.6486	32.9903	1568	1323	1538	3139	5139	5592	3020	1495	4646	377	1763	1729	3201	1226	3241	11759	8249	5090
Zm00001d008817	chr8	21509525	21515943	+	NAC-transcription factor 47	Zm00001d008817_T001	GO:0000976(transcription regulatory region sequence-specific DNA binding);GO:0003677(DNA binding);GO:0005634(nucleus);GO:0006355(regulation of transcription, DNA-templated);GO:0043565(sequence-specific DNA binding);GO:0044212(transcription regulatory region DNA binding)	NA	NA	NA	NAC domain containing protein 75	protein_coding	4.23376	5.2847	6.51536	11.1798	13.6901	15.8187	12.3131	6.33081	15.1547	7.76821	11.269	13.2228	37.352	16.2833	29.5021	40.84	24.0955	29.4944	480	612	758	1040	1226	1851	1377	850	1906	867	1683	1867	4973	1505	4254	5829	2859	4166
Zm00001d008826	chr8	21787238	21795721	-	gigantea1	Zm00001d008826_T002;Zm00001d008826_T004;Zm00001d008826_T005;Zm00001d008826_T006;Zm00001d008826_T007;Zm00001d008826_T008;Zm00001d008826_T009;Zm00001d008826_T011;Zm00001d008826_T013;Zm00001d008826_T014;Zm00001d008826_T015;Zm00001d008826_T017;Zm00001d008826_T020;Zm00001d008826_T022;Zm00001d008826_T024;Zm00001d008826_T025;Zm00001d008826_T026;Zm00001d008826_T028;Zm00001d008826_T030;Zm00001d008826_T031…	GO:0005634(nucleus);GO:0042752(regulation of circadian rhythm);GO:0048586(regulation of long-day photoperiodism, flowering);GO:2000028(regulation of photoperiodism, flowering);GO:2000028(regulation of photoperiodism, flowering)	04712(Circadian rhythm - plant);04712(Circadian rhythm - plant)	K12124	NA	gigantea1	protein_coding	58.9748	59.9835	69.4388	16.0626	22.0914	21.2846	124.188	75.3492	144.16	53.194	54.5418	62.25	16.8796	4.22198	8.61535	21.6803	19.3368	19.3636	26492	27509	32020	5936	7859	9885	55024	40100	71852	23535	32284	34837	8928	1553	4942	12277	9107	10843
Zm00001d008890	chr8	24123677	24129093	-	Zm00001d008890	Zm00001d008890_T001;Zm00001d008890_T002	GO:0003887(DNA-directed DNA polymerase activity);GO:0005634(nucleus);GO:0006260(DNA replication);GO:0006271(DNA strand elongation involved in DNA replication);GO:0006297(nucleotide-excision repair, DNA gap filling);GO:0043625(delta DNA polymerase complex);GO:0071897(DNA biosynthetic process);GO:1904161(DNA synthesis involved in UV-damage excision repair);GO:1904161(DNA synthesis involved in UV-da…	03030(DNA replication);03410(Base excision repair);03420(Nucleotide excision repair);03430(Mismatch repair);03440(Homologous recombination);03440(Homologous recombination)	K03504	NA	DNA-directed DNA polymerases	protein_coding	0.939052	0.777981	0.610501	1.12817	2.1778	1.97614	3.52194	1.42799	4.14289	0.846475	1.1994	1.10906	3.4886	2.96586	4.52974	0.529962	0.572948	1.11138	131	111	88	130	241	285	485	236	642	117	221	193	572	339	805	94	84	194
Zm00001d008926	chr8	25559932	25560483	-	Zm00001d008926	Zm00001d008926_T001	NA	NA	NA	NA		protein_coding	0.0001	0.0001	0.0001	0.0001	0.0001	0.0001	0.095517	0.0001	0.0001	7.77893	10.3616	13.6906	36.2015	19.4931	23.9991	9.42494	6.69195	10.1594	0	0	0	0	0	0	3	0	0	243	433	541	1349	504	968	377	223	402
Zm00001d009146	chr8	39524340	39526647	+	Zm00001d009146	Zm00001d009146_T001;Zm00001d009146_T002;Zm00001d009146_T003;Zm00001d009146_T004;Zm00001d009146_T005;Zm00001d009146_T006;Zm00001d009146_T007;Zm00001d009146_T008;Zm00001d009146_T009;Zm00001d009146_T010;Zm00001d009146_T011	GO:0000166(nucleotide binding);GO:0004478(methionine adenosyltransferase activity);GO:0005524(ATP binding);GO:0005829(cytosol);GO:0006556(S-adenosylmethionine biosynthetic process);GO:0006730(one-carbon metabolic process);GO:0016740(transferase activity);GO:0046872(metal ion binding);GO:0046872(metal ion binding)	00270(Cysteine and methionine metabolism);00270(Cysteine and methionine metabolism)	K00789	EC:2.5.1.6	S-adenosylmethionine synthase	protein_coding	17.8176	18.7785	4.1604	13.0888	13.3797	13.9955	8.51621	31.2076	4.68832	18.905	45.1259	33.8235	5.32379	0.798415	9.98431	77.2519	147.169	100.439	2061	2218	495	1245	1226	1674	974	4276	602	2154	6876	4874	726	76	1472	11252	17819	14475
Zm00001d009383	chr8	61549700	61552828	+	Zm00001d009383	Zm00001d009383_T001;Zm00001d009383_T002;Zm00001d009383_T003;Zm00001d009383_T004;Zm00001d009383_T005;Zm00001d009383_T006;Zm00001d009383_T007;Zm00001d009383_T008;Zm00001d009383_T009;Zm00001d009383_T010;Zm00001d009383_T011	GO:0003824(catalytic activity);GO:0004758(serine C-palmitoyltransferase activity);GO:0005783(endoplasmic reticulum);GO:0009058(biosynthetic process);GO:0030170(pyridoxal phosphate binding);GO:0046512(sphingosine biosynthetic process);GO:0046513(ceramide biosynthetic process);GO:0046513(ceramide biosynthetic process)	NA	NA	NA	Long chain base biosynthesis protein 1	protein_coding	1.12857	0.825341	1.02422	0.417991	0.555607	0.447526	1.20878	0.876475	0.607692	3.83226	3.60864	3.7715	1.77596	0.901424	2.70047	2.27568	1.89146	1.52446	172	129	160	52	69	71	182	159	103	575	722	714	318	113	524	437	302	290
Zm00001d009612	chr8	73133301	73134155	+	Zm00001d009612	Zm00001d009612_T001	NA	NA	NA	NA	DUF1645 family protein	protein_coding	0.778155	1.1063	1.42114	21.7171	53.3952	42.6635	1.91966	5.94484	3.656	1.24817	1.06375	2.09375	26.9311	8.7622	11.264	10.1315	12.0256	4.69947	39	56	72	875	2072	2163	93	346	200	61	69	129	1554	351	704	627	619	288
Zm00001d009652	chr8	74457985	74460042	+	acidic ribosomal protein P2a-2	Zm00001d009652_T001;Zm00001d009652_T002;Zm00001d009652_T003;Zm00001d009652_T004;Zm00001d009652_T005;Zm00001d009652_T006;Zm00001d009652_T008;Zm00001d009652_T009;Zm00001d009652_T010;Zm00001d009652_T011;Zm00001d009652_T012;Zm00001d009652_T013	GO:0003735(structural constituent of ribosome);GO:0005840(ribosome);GO:0006414(translational elongation);GO:0016020(membrane);GO:0016021(integral component of membrane);GO:0016021(integral component of membrane)	03010(Ribosome);03010(Ribosome)	K02943	NA	acidic ribosomal protein P2a-2	protein_coding	9.15708	17.5604	4.69469	2.54858	4.20936	4.66767	15.4673	12.9382	8.61472	9.43678	9.69438	3.14392	1.04743	0.714794	1.45965	1.81596	2.07019	2.9397	984	1919	521	230	360	521	1634	1643	1027	997	1370	425	139	67	206	252	238	398
Zm00001d009979	chr8	93239142	93240713	-	Zm00001d009979	Zm00001d009979_T001;Zm00001d009979_T002	GO:0005509(calcium ion binding);GO:0005544(calcium-dependent phospholipid binding);GO:0005737(cytoplasm);GO:0005737(cytoplasm)	NA	NA	NA	Annexin	protein_coding	0.0001	0.0001	0.0001	0.0001	0.0001	0.0001	0.106881	0.0001	0.0001	0.053675	0.666581	0.982853	6.05646	5.01136	5.18251	15.6654	10.7837	67.9926	0	0	0	0	0	0	8	0	0	4	59	83	477	274	442	1321	756	5671
Zm00001d010061	chr8	97788426	97791489	+	Zm00001d010061	Zm00001d010061_T001;Zm00001d010061_T002;Zm00001d010061_T003	NA	NA	NA	NA		protein_coding	11.97	16.543	24.9146	21.3266	61.0317	32.4522	31.9097	24.2388	36.4676	6.51447	6.27214	5.35531	11.6838	8.71029	22.519	7.33733	4.03814	7.40577	813	1146	1735	1187	3272	2274	2135	1949	2746	436	563	453	932	483	1945	628	288	627
Zm00001d010085	chr8	98804949	98806659	+	Zm00001d010085	Zm00001d010085_T001	NA	NA	NA	NA	loricrin-related	protein_coding	0.0001	0.0001	0.0001	0.0001	0.0001	0.0001	0.0001	0.0001	0.0001	2.49867	5.05622	4.50898	2.11003	0.611576	2.03493	4.49573	3.7873	2.96699	0	0	0	0	0	0	0	0	0	144	390	329	145	30	152	331	232	216
Zm00001d010183	chr8	103311689	103312009	+	Zm00001d010183	Zm00001d010183_T001	NA	NA	NA	NA		protein_coding	2.79971	1.07577	1.07899	18.6008	22.5383	61.7438	7.54611	3.28802	5.60644	1.4118	1.3873	2.92281	12.7392	6.52004	10.3219	3.38252	7.10241	35.3236	52	21	21	282	329	1176	138	72	115	26	34	68	276	99	243	79	138	812
Zm00001d010278	chr8	107106041	107110813	+	Zm00001d010278	Zm00001d010278_T001	GO:0005840(ribosome);GO:0006364(rRNA processing);GO:0043022(ribosome binding)	NA	NA	NA	16S rRNA processing protein RimM family	protein_coding	0.0001	0.057599	0.0001	0.141993	0.0001	0.0001	0.073601	0.0001	0.0001	1.75584	2.15506	2.42752	9.3132	6.92111	10.7576	1.03814	1.50416	2.10137	0	4	0	8	0	0	5	0	0	109	179	190	688	355	860	83	99	165
Zm00001d010387	chr8	112571027	112572392	-	Zm00001d010387	Zm00001d010387_T001	GO:0005829(cytosol);GO:0005840(ribosome);GO:0006545(glycine biosynthetic process);GO:0006567(threonine catabolic process);GO:0008732(L-allo-threonine aldolase activity)	NA	NA	NA	40S ribosomal protein S4-3	protein_coding	0.0001	0.0001	0.0001	0.0001	0.0001	0.0001	0.0001	0.0001	0.0001	3.17917	4.30091	3.92008	12.3926	10.5333	13.6467	2.53328	0.820312	1.18636	0	0	0	0	0	0	0	0	0	231	418	360	1073	633	1280	236	64	109
Zm00001d010493	chr8	117899468	117903017	+	Zm00001d010493	Zm00001d010493_T001	GO:0005515(protein binding);GO:0031146(SCF-dependent proteasomal ubiquitin-dependent protein catabolic process)	NA	NA	NA	F-box domain containing protein	protein_coding	2.84195	3.12175	3.6733	11.8795	19.6653	31.4567	13.6342	6.72423	14.2477	12.0528	23.4555	22.7124	116.5	157.19	97.2601	22.4185	37.6112	40.1151	162	181	214	553	881	1841	763	452	897	673	1752	1604	7759	7266	7015	1601	2233	2835
Zm00001d010690	chr8	124548140	124549582	-	Zm00001d010690	Zm00001d010690_T001	GO:0008194(UDP-glycosyltransferase activity);GO:0016740(transferase activity);GO:0043231(intracellular membrane-bounded organelle);GO:0080043(quercetin 3-O-glucosyltransferase activity);GO:0080044(quercetin 7-O-glucosyltransferase activity)	NA	NA	NA	Anthocyanidin 3-O-glucosyltransferase	protein_coding	0.534615	0.066685	2.06256	0.055296	0.057013	0.043946	0.290025	0.190566	0.176158	8.75969	18.5025	20.7329	1.42235	0.870913	6.74818	88.6996	83.4546	36.0991	45	6	176	4	4	4	24	19	17	715	2021	2141	139	59	712	9258	7243	3729
Zm00001d010693	chr8	124738149	124740137	+	Zm00001d010693	Zm00001d010693_T001	NA	NA	NA	NA	21.7 kDa class VI heat shock protein	protein_coding	15.0975	6.84772	14.2876	3.25872	3.49265	6.50948	9.25896	4.53786	10.0362	42.8153	58.4096	60.2056	13.9508	9.9279	12.8297	33.2317	37.1973	19.2449	866	401	841	154	159	386	524	309	639	2417	4411	4299	940	464	936	2399	2233	1375
Zm00001d010698	chr8	124955542	124959901	-	Zm00001d010698	Zm00001d010698_T001;Zm00001d010698_T002	GO:0003955(NAD(P)H dehydrogenase (quinone) activity);GO:0010181(FMN binding);GO:0016491(oxidoreductase activity);GO:0055114(oxidation-reduction process);GO:0055114(oxidation-reduction process)	NA	NA	NA	NAD(P)H dehydrogenase (quinone) FQR1	protein_coding	0.361891	1.044	0.672886	0.0001	0.137217	0.0001	0.365306	0.356367	0.302705	13.15	31.7779	27.0519	1.18147	0.746063	0.853773	7.51848	30.7091	1.03055	25	72	47	0	8	0	25	29	23	869	2807	2259	94	41	74	635	2156	87
Zm00001d010798	chr8	128194128	128195278	+	Zm00001d010798	Zm00001d010798_T001	NA	NA	NA	NA	oxidative stress 3	protein_coding	3.73293	4.30329	2.49686	8.15399	18.3322	14.6353	2.26459	2.60652	4.56832	2.98727	3.96775	4.17517	38.8001	20.208	47.8675	7.85641	7.41397	5.57149	227	267	156	407	881	919	136	188	309	179	318	317	2770	1002	3701	602	472	422
Zm00001d010802	chr8	128255294	128257515	-	Zm00001d010802	Zm00001d010802_T001	GO:0008194(UDP-glycosyltransferase activity);GO:0016740(transferase activity);GO:0016757(transferase activity, transferring glycosyl groups);GO:0016758(transferase activity, transferring hexosyl groups);GO:0043231(intracellular membrane-bounded organelle)	NA	NA	NA	UDP-glycosyltransferase 88A1	protein_coding	38.5394	41.7008	41.2655	27.908	20.3348	21.1987	13.0767	33.1896	17.0468	9.85336	11.0267	12.0313	2.29422	3.28167	3.56699	0.222596	0.166671	0.896139	2988	3300	3284	1776	1246	1697	1001	3049	1467	753	1127	1162	209	208	352	22	14	87
Zm00001d010969	chr8	135352146	135353765	-	Zm00001d010969	Zm00001d010969_T001	GO:0005886(plasma membrane);GO:0009506(plasmodesma);GO:0016020(membrane);GO:0016021(integral component of membrane)	NA	NA	NA	Tetraspanin-6	protein_coding	0.218038	0.225354	0.121326	1.19639	2.04772	2.50612	3.66464	0.786047	2.77152	1.62447	4.786	4.66382	12.2905	5.48107	8.80086	5.51249	7.30216	10.3988	20	21	11	87	143	228	318	82	271	141	554	511	1268	393	984	610	672	1139
Zm00001d010971	chr8	135478420	135481363	-	Zm00001d010971	Zm00001d010971_T001;Zm00001d010971_T002;Zm00001d010971_T003	GO:0000166(nucleotide binding);GO:0002229(defense response to oomycetes);GO:0004672(protein kinase activity);GO:0004674(protein serine/threonine kinase activity);GO:0004675(transmembrane receptor protein serine/threonine kinase activity);GO:0005524(ATP binding);GO:0005886(plasma membrane);GO:0006468(protein phosphorylation);GO:0006952(defense response);GO:0007178(transmembrane receptor protein se…	NA	NA	NA	Receptor-like kinase LIP2	protein_coding	3.96305	4.34412	3.97296	1.57373	1.47829	1.78697	5.07822	3.74108	4.02845	0.722077	2.66538	2.30135	0.192099	0.148919	0.177426	0.323598	1.43432	1.04152	983	1100	1011	321	290	458	1243	1099	1109	177	871	711	56	31	56	102	374	322
Zm00001d011003	chr8	136383321	136385182	-	Zm00001d011003	Zm00001d011003_T001	NA	NA	NA	NA	Loricrin [Source:UniProtKB/TrEMBL;Acc:K7V5V5]	protein_coding	0.0001	0.0001	0.0001	0.0001	0.0001	0.0001	0.0001	0.0001	0.0001	0.0001	0.187637	0.09632	4.31642	4.80866	18.2045	6.59619	4.62129	0.435787	0	0	0	0	0	0	0	0	0	0	24	12	477	369	2178	781	455	52
Zm00001d011051	chr8	137414912	137418125	-	Zm00001d011051	Zm00001d011051_T001;Zm00001d011051_T002;Zm00001d011051_T003;Zm00001d011051_T004;Zm00001d011051_T005;Zm00001d011051_T006;Zm00001d011051_T007	NA	NA	NA	NA	ACT domain-containing protein ACR9	protein_coding	14.2715	14.2714	14.1809	36.6007	62.1792	40.2411	3.68433	9.00011	5.76736	27.4209	46.1022	43.8148	127.843	79.2275	85.6693	21.1821	11.8739	42.8701	2099	2142	2141	4414	7220	6106	536	1569	944	3970	8924	8020	22066	9495	16014	3922	1831	7853
Zm00001d011094	chr8	138799239	138803607	+	Zm00001d011094	Zm00001d011094_T001;Zm00001d011094_T002	NA	NA	NA	NA		protein_coding	0.0001	0.0001	0.0001	0.0001	0.0001	0.0001	0.0001	0.0001	0.0001	10.775	8.48096	9.17311	21.271	19.5875	21.9513	4.1073	0.239225	7.22634	0	0	0	0	0	0	0	0	0	622	655	670	1464	936	1637	304	15	528
Zm00001d011123	chr8	139676207	139677622	-	Zm00001d011123	Zm00001d011123_T001	GO:0046872(metal ion binding)	NA	NA	NA	Zinc finger protein	protein_coding	0.0001	0.0001	2.34008	0.906913	7.03037	0.876807	118.243	13.4874	100.111	0.524746	0.0001	0.0001	4.20922	1.49932	41.7395	1.76592	0.304199	0.978978	0	0	123	38	283	47	5942	814	5660	27	0	0	252	63	2706	114	17	63
Zm00001d011126	chr8	139741555	139742462	-	Zm00001d011126	Zm00001d011126_T001	NA	NA	NA	NA		protein_coding	0.0001	0.0001	0.0001	0.0001	0.0001	0.273634	0.32736	0.271392	0.285756	1.54529	0.658235	0.375545	4.80815	2.3292	5.85298	1.69798	2.4503	15.5603	0	0	0	0	0	10	12	11	11	52	30	16	194	65	255	74	88	663
Zm00001d011183	chr8	142217718	142219220	-	thiamine biosynthesis1	Zm00001d011183_T001	GO:0005506(iron ion binding);GO:0005829(cytosol);GO:0009228(thiamine biosynthetic process);GO:0009507(chloroplast);GO:0009536(plastid);GO:0009570(chloroplast stroma);GO:0016740(transferase activity);GO:0016763(transferase activity, transferring pentosyl groups);GO:0046872(metal ion binding);GO:0052837(thiazole biosynthetic process)	00730(Thiamine metabolism)	K03146	EC:2.4.2.60	thiamine biosynthesis1	protein_coding	4305.3	3828.51	4198.57	10.3272	19.5499	26.8644	1803.07	3043.54	2550.23	3533.96	5695.39	4798.24	52.4071	34.9293	86.8027	178.139	196.474	108.982	349283	317073	349650	688	1254	2251	144320	292554	229651	282370	608884	485033	4997	2312	8962	18206	16696	11024
Zm00001d011192	chr8	142592861	142598233	+	Zm00001d011192	Zm00001d011192_T001;Zm00001d011192_T002	GO:0000050(urea cycle);GO:0000166(nucleotide binding);GO:0004087(carbamoyl-phosphate synthase (ammonia) activity);GO:0004088(carbamoyl-phosphate synthase (glutamine-hydrolyzing) activity);GO:0005524(ATP binding);GO:0005737(cytoplasm);GO:0006526(arginine biosynthetic process);GO:0006541(glutamine metabolic process);GO:0006807(nitrogen compound metabolic process);GO:0019856(pyrimidine nucleobase bi…	00240(Pyrimidine metabolism);00250(Alanine, aspartate and glutamate metabolism);00250(Alanine, aspartate and glutamate metabolism)	K01955	EC:6.3.5.5	Carbamoyl-phosphate synthase large chain chloroplastic	protein_coding	11.6365	12.7572	8.69031	18.8302	25.645	25.6826	17.4319	15.8918	15.9037	8.37639	10.7808	8.27704	4.48192	3.19089	5.86642	2.81401	3.70223	7.30754	2901	3246	2224	3852	5052	6611	4287	4693	4400	2057	3541	2571	1313	649	1861	884	967	2271
Zm00001d011193	chr8	142602686	142607439	-	Zm00001d011193	Zm00001d011193_T001	GO:0006656(phosphatidylcholine biosynthetic process);GO:0016020(membrane);GO:0016021(integral component of membrane);GO:0071617(lysophospholipid acyltransferase activity)	NA	NA	NA	integral membrane protein	protein_coding	1.88304	1.04249	1.20423	8.77243	16.5909	20.2727	4.10515	1.4987	4.43438	2.03666	3.04861	2.31327	6.44241	3.87434	7.25678	2.96073	5.75464	16.1527	188	106	124	717	1306	2085	404	177	491	200	400	287	754	315	920	372	601	2005
Zm00001d011253	chr8	144623902	144628703	-	Zm00001d011253	Zm00001d011253_T001;Zm00001d011253_T002;Zm00001d011253_T003;Zm00001d011253_T004;Zm00001d011253_T005;Zm00001d011253_T006;Zm00001d011253_T007;Zm00001d011253_T008;Zm00001d011253_T009	GO:0004679(AMP-activated protein kinase activity);GO:0005634(nucleus);GO:0005737(cytoplasm);GO:0006468(protein phosphorylation);GO:0016020(membrane);GO:0016021(integral component of membrane);GO:0016208(AMP binding);GO:0019887(protein kinase regulator activity);GO:0019901(protein kinase binding);GO:0031588(nucleotide-activated protein kinase complex);GO:0042149(cellular response to glucose starva…	NA	NA	NA	Sucrose nonfermenting 4-like protein	protein_coding	0.051598	0.0321413	0.029493	0.0466537	0.0416267	0.0253152	0.170526	0.0407395	0.0800551	7.03358	10.9881	10.0624	22.7245	17.5725	23.4904	8.70394	4.57941	2.98546	13	8	7	10	8	7	42	11	21	1563	3265	2827	6016	3229	6734	2472	1084	842
Zm00001d011384	chr8	149205043	149206335	-	Zm00001d011384	Zm00001d011384_T001	GO:0003729(mRNA binding);GO:0005829(cytosol);GO:1990904(ribonucleoprotein complex)	NA	NA	NA		protein_coding	0.0001	0.298731	0.0001	1.37983	1.63228	0.0001	0.538845	0.0001	0.566689	1.9299	5.24401	4.11206	10.0951	7.28169	9.42043	3.51721	4.07167	5.07074	0	17	0	62	71	0	29	0	35	104	377	280	647	324	654	242	233	345
Zm00001d011401	chr8	149523666	149538687	+	Zm00001d011401	Zm00001d011401_T001;Zm00001d011401_T002;Zm00001d011401_T003;Zm00001d011401_T004;Zm00001d011401_T005	GO:0005515(protein binding);GO:0005634(nucleus);GO:0005737(cytoplasm);GO:0006952(defense response);GO:0031647(regulation of protein stability);GO:0050821(protein stabilization);GO:0050832(defense response to fungus);GO:2000072(regulation of defense response to fungus, incompatible interaction);GO:2000072(regulation of defense response to fungus, incompatible interaction)	04626(Plant-pathogen interaction);04626(Plant-pathogen interaction)	K12795	NA	Protein SGT1 homolog A	protein_coding	7.65559	6.46998	6.97658	30.5495	32.1968	43.5478	17.499	10.1284	19.3003	9.65677	13.331	12.8178	144.529	93.7301	112.908	27.4722	29.4454	45.922	691	596	646	2261	2294	4053	1556	1083	1931	858	1584	1440	15301	6888	12946	3119	2780	5159
Zm00001d011454	chr8	150927227	150934087	+	carbonic anhydrase6	Zm00001d011454_T001	GO:0004089(carbonate dehydratase activity);GO:0005737(cytoplasm);GO:0008270(zinc ion binding);GO:0009440(cyanate catabolic process);GO:0010037(response to carbon dioxide);GO:0010119(regulation of stomatal movement);GO:0015976(carbon utilization);GO:0016829(lyase activity)	00910(Nitrogen metabolism)	K01673	EC:4.2.1.1	carbonic anhydrase6	protein_coding	458.715	610.682	499.922	64.9704	152.178	73.6249	21.4559	271.109	41.5996	1010.26	1335.97	1377.79	334.744	187.969	408.808	774.233	855.819	560.217	24626	33467	27549	2863	6457	4082	1137	17245	2479	53415	94510	92160	21118	8231	27929	52360	48122	37496
Zm00001d011461	chr8	151002173	151002925	-	Zm00001d011461	Zm00001d011461_T001	NA	NA	NA	NA	uncharacterized protein [Source:UniProtKB/TrEMBL;Acc:B6SMQ8]	protein_coding	57.0678	49.0321	191.662	77.8678	64.5409	16.3982	1931.23	126.387	2044.75	15.8273	20.1143	41.2495	42.7904	39.583	535.486	120.827	96.4077	7.62782	2052	1800	7072	2297	1834	609	68483	5383	81576	561	953	1848	1808	1161	24493	5471	3630	342
Zm00001d011604	chr8	155670822	155680914	+	Zm00001d011604	Zm00001d011604_T001;Zm00001d011604_T002;Zm00001d011604_T003;Zm00001d011604_T004;Zm00001d011604_T005;Zm00001d011604_T006;Zm00001d011604_T007;Zm00001d011604_T008;Zm00001d011604_T009;Zm00001d011604_T010;Zm00001d011604_T011;Zm00001d011604_T012;Zm00001d011604_T013;Zm00001d011604_T014;Zm00001d011604_T015;Zm00001d011604_T016;Zm00001d011604_T017;Zm00001d011604_T018;Zm00001d011604_T019;Zm00001d011604_T020…	GO:0004672(protein kinase activity);GO:0004674(protein serine/threonine kinase activity);GO:0005524(ATP binding);GO:0005634(nucleus);GO:0005737(cytoplasm);GO:0006468(protein phosphorylation);GO:0016301(kinase activity);GO:0016310(phosphorylation);GO:0035556(intracellular signal transduction);GO:0035556(intracellular signal transduction)	NA	NA	NA		protein_coding	0.450988	0.0299852	0.181356	0.184321	1.15256	0.772077	1.12107	0.289904	0.94831	0.913566	1.29233	0.889793	4.71324	3.26399	2.9708	4.33397	2.83779	2.20735	256	18	108	85	513	450	627	194	595	521	973	637	3135	1523	2141	3085	1689	1562
Zm00001d011734	chr8	160235115	160235972	-	Zm00001d011734	Zm00001d011734_T001	GO:0016311(dephosphorylation);GO:0016791(phosphatase activity);GO:0046872(metal ion binding)	00564(Glycerophospholipid metabolism)	K06124	EC:3.1.3.75	Inorganic pyrophosphatase 1	protein_coding	32.9772	15.6723	54.4991	4.31518	11.0841	1.70412	179.905	58.5052	87.4722	113.089	445.455	644.44	22.8966	10.4763	32.1809	3233.75	2993.57	1714.86	1625	789	2756	175	432	87	8744	3415	4784	5487	28918	39557	1326	421	2018	200680	154464	105325
Zm00001d011785	chr8	161545498	161546157	+	G2-like-transcription factor 56	Zm00001d011785_T001	GO:0003677(DNA binding);GO:0003700(DNA-binding transcription factor activity);GO:0005634(nucleus);GO:0006355(regulation of transcription, DNA-templated)	NA	NA	NA	Transcription factor LUX	protein_coding	88.3466	62.5287	76.3514	0.330539	0.208347	0.808185	18.8258	31.8694	17.4523	41.6109	81.6805	85.6242	3.44752	9.9115	12.9236	0.293275	0.643639	1.05012	3348	2419	2970	11	7	32	704	1431	735	1553	4079	4043	154	307	624	14	26	50
Zm00001d011879	chr8	163860396	163861291	+	Zm00001d011879	Zm00001d011879_T001	NA	NA	NA	NA		protein_coding	0.0001	0.0001	0.0001	0.0001	0.0001	0.0001	0.866707	0.0001	0.0001	3.67841	8.54191	3.60585	20.0024	5.27883	17.8665	2.33358	7.18267	10.1402	0	0	0	0	0	0	41	0	0	173	536	214	1119	205	1083	140	359	602
Zm00001d011904	chr8	164264227	164283828	+	Zm00001d011904	Zm00001d011904_T001;Zm00001d011904_T002;Zm00001d011904_T003	GO:0005789(endoplasmic reticulum membrane);GO:0005886(plasma membrane);GO:0016020(membrane);GO:0016021(integral component of membrane);GO:0061817(endoplasmic reticulum-plasma membrane tethering);GO:0090158(endoplasmic reticulum membrane organization);GO:0090158(endoplasmic reticulum membrane organization)	NA	NA	NA	Vesicle-associated protein 2-2	protein_coding	0.516003	0.597489	0.567496	5.00705	8.51291	2.98487	4.14646	0.99146	3.69108	1.21031	3.17526	1.99089	13.0389	10.4619	15.0908	6.71626	7.09879	6.11164	60	71	67	473	773	354	470	135	471	137	482	286	1760	980	2206	972	855	876
Zm00001d011990	chr8	166013366	166015642	-	Zm00001d011990	Zm00001d011990_T001	GO:0000724(double-strand break repair via homologous recombination);GO:0003677(DNA binding);GO:0005507(copper ion binding);GO:0008131(primary amine oxidase activity);GO:0009308(amine metabolic process);GO:0048038(quinone binding);GO:0055114(oxidation-reduction process)	NA	NA	NA	cobalt ion binding	protein_coding	0.0001	0.0001	0.0001	0.0001	0.0001	0.0001	0.0001	0.062899	0.0001	5.93584	6.89068	7.73987	20.3558	13.7692	22.6971	5.19441	3.93826	5.1449	0	0	0	0	0	0	0	5	0	375	582	618	1533	720	1851	420	265	412
Zm00001d012010	chr8	166461603	166461962	-	Zm00001d012010	Zm00001d012010_T001	GO:0016020(membrane);GO:0016021(integral component of membrane)	NA	NA	NA		protein_coding	5.22247	9.42799	5.1153	23.8183	40.1149	23.9179	3.28094	9.98887	1.42673	2.16861	6.07491	4.91673	194.232	171.977	181.318	3.48667	8.79091	76.443	108	199	109	405	656	511	67	245	33	45	166	127	4718	2900	4770	91	191	1970
Zm00001d012212	chr8	170115789	170118570	-	gibberellin 20-oxidase5	Zm00001d012212_T001	GO:0009416(response to light stimulus);GO:0009686(gibberellin biosynthetic process);GO:0009826(unidimensional cell growth);GO:0009908(flower development);GO:0016491(oxidoreductase activity);GO:0045544(gibberellin 20-oxidase activity);GO:0046872(metal ion binding);GO:0051213(dioxygenase activity);GO:0055114(oxidation-reduction process)	NA	NA	NA	gibberellin 20-oxidase5	protein_coding	2.59078	0.592049	0.10959	2.65361	2.03827	7.43513	0.284382	0.413775	1.46365	0.312446	4.19482	2.51702	0.509059	0.180269	0.24331	28.7749	13.6971	28.7215	254	60	11	213	158	750	28	48	159	31	540	307	59	15	31	3541	1402	3498
Zm00001d012289	chr8	171916105	171917804	+	Zm00001d012289	Zm00001d012289_T001	NA	NA	NA	NA	Transposon protein Mutator sub-class	protein_coding	19.4459	14.8423	17.1769	14.1478	14.7856	23.8322	16.9067	13.0665	19.0838	1.20866	2.56802	3.0814	9.50029	6.33545	6.11352	2.20199	1.30175	1.81309	1684	1312	1527	1006	1012	2131	1445	1341	1835	104	293	333	967	448	674	241	119	196
Zm00001d012322	chr8	172403401	172405359	-	Zm00001d012322	Zm00001d012322_T001;Zm00001d012322_T002	GO:0004497(monooxygenase activity);GO:0005506(iron ion binding);GO:0016020(membrane);GO:0016491(oxidoreductase activity);GO:0016705(oxidoreductase activity, acting on paired donors, with incorporation or reduction of molecular oxygen);GO:0016709(oxidoreductase activity, acting on paired donors, with incorporation or reduction of molecular oxygen, NAD(P)H as one donor, and incorporation of one ato…	NA	NA	NA	cytochrome P450 family 81 subfamily D polypeptide 8	protein_coding	0.106426	0.207891	0.0001	2.00902	7.21234	2.60762	6.05997	1.03423	1.91116	0.071912	0.11637	0.221916	25.197	6.47994	8.01706	2.41096	3.59557	27.884	12	23	0	175	605	286	634	130	225	8	17	30	3139	561	1082	322	400	3685
Zm00001d012361	chr8	173019571	173023422	+	Zm00001d012361	Zm00001d012361_T001;Zm00001d012361_T002	GO:0004843(thiol-dependent ubiquitin-specific protease activity);GO:0005634(nucleus);GO:0016579(protein deubiquitination);GO:0016787(hydrolase activity);GO:0016787(hydrolase activity)	04141(Protein processing in endoplasmic reticulum);04141(Protein processing in endoplasmic reticulum)	K11863	EC:3.4.22.-	Ataxin-3 homolog	protein_coding	1.0648	0.716501	0.74751	3.66351	3.96461	4.96134	1.87327	1.3429	2.10879	2.67795	5.11206	3.46409	10.3073	8.67534	8.66126	3.40502	2.84461	7.61262	101	69	73	283	295	483	174	150	221	249	634	407	1139	667	1037	405	281	894
Zm00001d012394	chr8	173522111	173525090	-	phytoene synthase2	Zm00001d012394_T001	GO:0004310(farnesyl-diphosphate farnesyltransferase activity);GO:0006696(ergosterol biosynthetic process);GO:0008299(isoprenoid biosynthetic process);GO:0009058(biosynthetic process);GO:0009507(chloroplast);GO:0009536(plastid);GO:0010287(plastoglobule);GO:0016020(membrane);GO:0016021(integral component of membrane);GO:0016117(carotenoid biosynthetic process);GO:0016120(carotene biosynthetic proce…	00906(Carotenoid biosynthesis)	K02291	EC:2.5.1.32	phytoene synthase2	protein_coding	37.6569	42.9189	51.8976	1.19975	0.771126	1.49843	6.99695	20.2511	3.15262	27.8989	61.8487	63.5789	4.76748	2.08059	18.5475	266.412	410.4	235.477	3395	3950	4803	89	55	140	623	2163	316	2477	7347	7141	506	153	2128	30253	38749	26465
Zm00001d012402	chr8	173744941	173746395	+	Zm00001d012402	Zm00001d012402_T001	GO:0045927(positive regulation of growth)	NA	NA	NA		protein_coding	6.54138	5.80391	5.02447	15.3547	15.7771	23.786	6.4051	4.34942	8.46868	0.851275	1.19107	1.10584	4.00381	1.5445	4.34985	1.15814	0.667729	1.868	547	495	431	1053	1042	2053	528	431	786	71	132	116	394	106	463	122	59	195
Zm00001d012403	chr8	173833171	173833791	+	Zm00001d012403	Zm00001d012403_T001	NA	NA	NA	NA		protein_coding	0.968785	0.498684	0.529811	19.3763	14.0871	24.445	1.67849	0.914977	2.40165	0.381877	1.20544	1.09901	119.558	46.1937	34.4712	1.27794	0.583201	22.1111	35	19	20	568	397	901	60	39	96	14	57	49	5010	1344	1565	58	22	983
Zm00001d012413	chr8	174053520	174058410	-	Zm00001d012413	Zm00001d012413_T001	GO:0003677(DNA binding);GO:0003700(DNA-binding transcription factor activity);GO:0005634(nucleus);GO:0006355(regulation of transcription, DNA-templated);GO:0043565(sequence-specific DNA binding)	NA	NA	NA	Probable WRKY transcription factor 49	protein_coding	0.0001	0.0001	0.0001	0.0001	0.0001	0.025607	0.0001	0.0001	0.0001	1.09505	1.36881	0.71198	0.616358	0.323444	0.584593	0.344907	0.278592	0.101264	0	0	0	0	0	8	0	0	0	296	495	244	199	73	204	120	80	35
Zm00001d012415	chr8	174152244	174153551	-	Zm00001d012415	Zm00001d012415_T001	GO:0004190(aspartic-type endopeptidase activity);GO:0006508(proteolysis);GO:0008233(peptidase activity);GO:0030163(protein catabolic process)	NA	NA	NA	Putative aspartic protease family protein	protein_coding	5.11515	4.66622	3.94786	2.66814	8.27027	32.1972	14.576	6.45073	19.2817	4.52183	5.8288	3.85194	2.90926	0.398774	1.15809	0.393352	0.134079	0.759573	385	358	305	165	491	2498	1080	574	1608	335	577	361	257	25	111	38	11	72
Zm00001d012423	chr8	174293032	174293445	+	Zm00001d012423	Zm00001d012423_T001	GO:0000786(nucleosome);GO:0003677(DNA binding);GO:0005634(nucleus);GO:0005694(chromosome);GO:0006334(nucleosome assembly);GO:0046982(protein heterodimerization activity)	NA	K11252	NA	Histone H2B	protein_coding	32.1715	18.901	32.5218	1.41271	7.33775	5.28509	18.5871	15.473	17.9425	41.5537	58.4517	88.0407	19.555	21.1293	27.1224	39.1429	49.7606	191.478	765	459	794	28	138	130	436	436	474	973	1831	2608	547	410	821	1173	1239	5675
Zm00001d012479	chr8	175279648	175291084	+	Zm00001d012479	Zm00001d012479_T001;Zm00001d012479_T002;Zm00001d012479_T003;Zm00001d012479_T004	NA	NA	NA	NA		protein_coding	0.0001	0.0001	0.0001	0.0001	0.0001	0.0001	0.0001	0.0001	0.0001	0.861125	1.03678	1.16833	2.99604	2.28503	3.53493	1.16787	0.442356	1.09617	0	0	0	0	0	0	0	0	0	265	427	455	1099	582	1403	459	145	428
Zm00001d012510	chr8	175694309	175696390	+	Zm00001d012510	Zm00001d012510_T001	GO:0004497(monooxygenase activity);GO:0005506(iron ion binding);GO:0005774(vacuolar membrane);GO:0005783(endoplasmic reticulum);GO:0005794(Golgi apparatus);GO:0005886(plasma membrane);GO:0006744(ubiquinone biosynthetic process);GO:0009505(plant-type cell wall);GO:0009506(plasmodesma);GO:0009555(pollen development);GO:0009808(lignin metabolic process);GO:0016020(membrane);GO:0016491(oxidoreductase…	NA	NA	NA	Putative cytochrome P450 superfamily protein	protein_coding	2.55592	3.41106	3.12554	116.378	163.845	134.656	18.8442	3.28346	13.379	3.176	5.21352	2.70598	82.0336	25.0004	54.0968	13.8119	25.5867	125.876	212	288	266	7897	10707	11498	1538	322	1228	259	569	279	7971	1686	5692	1439	2216	12976
Zm00001d012520	chr8	176016314	176016934	-	Zm00001d012520	Zm00001d012520_T001	NA	NA	NA	NA	Protein LURP-one-related 8	protein_coding	2.23623	2.9943	0.482695	0.753172	1.27418	1.58933	0.0001	2.47255	0.329825	5.86551	10.8698	12.4083	2.47514	1.61567	4.72191	5.99906	6.94164	27.0761	80	109	18	23	36	59	0	105	14	206	511	552	104	47	215	270	260	1204
Zm00001d012532	chr8	176203820	176207127	+	Zm00001d012532	Zm00001d012532_T001	NA	NA	NA	NA		protein_coding	27.8091	20.4746	22.9655	51.5243	91.9492	110.019	15.553	23.1778	20.2248	1.05828	8.41169	8.9412	42.9412	32.0931	23.779	2.25444	1.97782	2.77164	3461	2601	2934	5262	9042	14137	1910	3417	2794	130	1380	1387	6279	3257	3766	354	258	430
Zm00001d012544	chr8	176420877	176424706	-	MYB-transcription factor 74	Zm00001d012544_T001;Zm00001d012544_T002	GO:0000976(transcription regulatory region sequence-specific DNA binding);GO:0003677(DNA binding);GO:0003700(DNA-binding transcription factor activity);GO:0005634(nucleus);GO:0006355(regulation of transcription, DNA-templated);GO:0030154(cell differentiation);GO:0043565(sequence-specific DNA binding);GO:0044212(transcription regulatory region DNA binding);GO:0044212(transcription regulatory regio…	NA	K09422	NA	myb domain protein 81	protein_coding	3.56608	4.1311	4.95368	6.43803	9.98228	9.18987	11.2247	6.03068	14.1146	0.105817	0.734112	0.320029	1.137	1.11909	1.81568	0.310601	0.234067	0.65523	479	566	682	708	1057	1272	1485	958	2099	14	130	54	180	123	310	53	33	110
Zm00001d012569	chr8	176786650	176789645	+	Zm00001d012569	Zm00001d012569_T001	NA	NA	NA	NA		protein_coding	0.0001	0.0001	0.0001	0.0001	0.081121	0.043834	0.2231	0.0001	0.042753	0.0001	0.395743	0.146806	2.1261	0.600994	1.72208	2.749	1.91798	2.75344	0	0	0	0	6	4	18	0	4	0	42	15	198	39	174	275	160	273
Zm00001d012618	chr8	177290270	177290911	-	Zm00001d012618	Zm00001d012618_T001	GO:0000813(ESCRT I complex);GO:0005768(endosome);GO:0015031(protein transport);GO:0032509(endosome transport via multivesicular body sorting pathway);GO:0043328(protein transport to vacuole involved in ubiquitin-dependent protein catabolic process via the multivesicular body sorting pathway);GO:0044877(protein-containing complex binding)	04144(Endocytosis)	K12184	NA	VPS28-like protein	protein_coding	23.4235	16.1263	19.6531	30.8299	45.8596	46.791	26.2479	16.1433	22.0569	15.936	33.6575	35.5885	94.588	66.1401	93.5896	64.8309	54.8249	85.1162	864	607	744	933	1337	1782	955	706	903	579	1635	1635	4098	1989	4391	3011	2117	3912
Zm00001d012672	chr8	178360607	178372390	+	Zm00001d012672	Zm00001d012672_T001;Zm00001d012672_T002;Zm00001d012672_T003;Zm00001d012672_T004;Zm00001d012672_T005;Zm00001d012672_T006;Zm00001d012672_T007;Zm00001d012672_T008;Zm00001d012672_T009;Zm00001d012672_T010;Zm00001d012672_T012;Zm00001d012672_T013;Zm00001d012672_T014;Zm00001d012672_T015	GO:0000166(nucleotide binding);GO:0005515(protein binding);GO:0005524(ATP binding);GO:0009451(RNA modification);GO:0016301(kinase activity);GO:0016310(phosphorylation);GO:0016811(hydrolase activity, acting on carbon-nitrogen (but not peptide) bonds, in linear amides);GO:0043231(intracellular membrane-bounded organelle);GO:0043231(intracellular membrane-bounded organelle)	00460(Cyanoamino acid metabolism);00630(Glyoxylate and dicarboxylate metabolism);00900(Terpenoid backbone biosynthesis);00910(Nitrogen metabolism);00910(Nitrogen metabolism)	K01455;K06981	EC:3.5.1.49;EC:2.7.4.26	protein; Pentatricopeptide (PPR) repeat protein-like	protein_coding	5.74013	3.47278	4.32257	1.93467	2.45174	2.0733	13.5935	6.20832	16.0004	4.19318	6.52756	6.53717	0.702469	0.584372	1.20574	1.18321	0.951636	1.41612	3484	2155	2694	966	1179	1305	8135	4464	10773	2507	5219	4941	505	293	935	907	607	1074
Zm00001d012677	chr8	178446315	178457867	-	Zm00001d012677	Zm00001d012677_T001;Zm00001d012677_T002;Zm00001d012677_T003;Zm00001d012677_T004;Zm00001d012677_T005;Zm00001d012677_T006;Zm00001d012677_T007;Zm00001d012677_T008;Zm00001d012677_T009;Zm00001d012677_T010;Zm00001d012677_T011;Zm00001d012677_T012;Zm00001d012677_T013;Zm00001d012677_T014;Zm00001d012677_T015;Zm00001d012677_T016;Zm00001d012677_T017	GO:0000145(exocyst);GO:0006629(lipid metabolic process);GO:0006887(exocytosis);GO:0008081(phosphoric diester hydrolase activity);GO:0008889(glycerophosphodiester phosphodiesterase activity);GO:0015031(protein transport);GO:0015031(protein transport)	NA	NA	NA	Glycerophosphodiester phosphodiesterase GDPD5	protein_coding	0.743043	0.545335	0.380203	1.19965	1.05927	1.03867	1.04004	0.806434	1.03617	0.269265	1.38414	1.08178	2.89483	1.76547	2.76567	1.84082	2.29505	1.87188	397	304	209	527	448	574	550	512	615	142	972	720	1813	773	1874	1239	1281	1245
Zm00001d012687	chr8	178645606	178650028	+	Zm00001d012687	Zm00001d012687_T001	GO:0004806(triglyceride lipase activity);GO:0006629(lipid metabolic process);GO:0016020(membrane);GO:0016021(integral component of membrane);GO:0016042(lipid catabolic process);GO:0016787(hydrolase activity)	00100(Steroid biosynthesis);00561(Glycerolipid metabolism);00564(Glycerophospholipid metabolism);00565(Ether lipid metabolism);00590(Arachidonic acid metabolism);00591(Linoleic acid metabolism);00592(alpha-Linolenic acid metabolism)	K14674	2.3.1.51;3.1.1.13;3.1.1.4;EC:3.1.1.3	Putative phospholipase%2C patatin family protein	protein_coding	2.29995	1.14287	2.36684	6.05636	8.64851	11.5758	4.97314	2.40795	5.98648	0.612089	0.962292	1.04554	5.01744	3.31435	3.67017	0.952601	0.728832	2.03493	446	226	471	963	1324	2316	951	553	1287	117	246	253	1142	524	905	233	148	492
Zm00001d012725	chr8	179214402	179228713	-	TCP-transcription factor 29	Zm00001d012725_T001;Zm00001d012725_T002	GO:0003700(DNA-binding transcription factor activity);GO:0005634(nucleus);GO:0006351(transcription, DNA-templated);GO:0006355(regulation of transcription, DNA-templated);GO:0043565(sequence-specific DNA binding);GO:0048831(regulation of shoot system development);GO:2000032(regulation of secondary shoot formation);GO:2000032(regulation of secondary shoot formation)	NA	NA	NA	Transcription factor TCP4	protein_coding	9.47989	16.1614	12.5655	27.582	29.3832	45.9942	13.0763	15.9768	13.2572	0.932086	1.12214	1.31773	4.66771	3.37547	6.87016	1.48961	0.530986	1.0219	1472	2562	2003	3515	3606	7375	2003	2939	2285	143	230	255	852	428	1358	292	87	198
Zm00001d012824	chr5	928945	929484	+	Zm00001d012824	Zm00001d012824_T001	GO:0003725(double-stranded RNA binding);GO:0004525(ribonuclease III activity);GO:0005634(nucleus);GO:0005773(vacuole);GO:0006396(RNA processing);GO:0010197(polar nucleus fusion);GO:0030422(production of siRNA involved in RNA interference);GO:0031053(primary miRNA processing);GO:0031054(pre-miRNA processing);GO:0090501(RNA phosphodiester bond hydrolysis);GO:0090502(RNA phosphodiester bond hydrolys…	NA	NA	NA	RNA binding protein	protein_coding	24.722	23.2258	17.9098	14.2529	19.2677	16.0381	65.7771	29.2314	35.7002	10.6429	16.4987	12.694	4.51811	2.58668	6.13107	7.74724	10.5695	18.4931	767	736	570	363	473	514	2013	1074	1229	325	675	491	165	66	242	303	344	715
Zm00001d012939	chr5	2237403	2238414	-	Zm00001d012939	Zm00001d012939_T001	GO:0004867(serine-type endopeptidase inhibitor activity);GO:0005576(extracellular region);GO:0010466(negative regulation of peptidase activity);GO:0010951(negative regulation of endopeptidase activity);GO:0030414(peptidase inhibitor activity)	NA	NA	NA	Bowman-Birk type trypsin inhibitor	protein_coding	2.83261	1.61067	0.766301	1.91465	4.00468	2.34454	0.221914	1.54125	0.427137	4.96827	13.1794	10.5749	236.327	102.798	123.846	4.37511	7.17501	5.61024	129	75	36	72	145	111	10	84	22	223	791	600	12645	3818	7176	251	343	319
Zm00001d012953	chr5	2330281	2333027	-	Zm00001d012953	Zm00001d012953_T001	GO:0006857(oligopeptide transport);GO:0015333(peptide:proton symporter activity);GO:0016020(membrane);GO:0016021(integral component of membrane);GO:0022857(transmembrane transporter activity);GO:0035672(oligopeptide transmembrane transport);GO:0035673(oligopeptide transmembrane transporter activity);GO:0055085(transmembrane transport);GO:1902600(proton transmembrane transport);GO:1904680(peptide …	NA	NA	NA	Protein NRT1/ PTR FAMILY 5.6	protein_coding	13.4104	13.5443	13.0923	7.22106	18.5056	8.17749	1.50434	12.8005	5.28233	0.565524	1.09487	1.4586	0.092078	0.0001	0.458191	0.448653	0.837435	0.0001	1628	1679	1632	720	1776	1026	181	1841	712	68	176	221	14	0	71	69	107	0
Zm00001d012979	chr5	2666357	2681076	+	Alfin-like-transcription factor 17	Zm00001d012979_T001;Zm00001d012979_T002;Zm00001d012979_T003;Zm00001d012979_T004;Zm00001d012979_T005;Zm00001d012979_T006;Zm00001d012979_T007;Zm00001d012979_T008;Zm00001d012979_T009;Zm00001d012979_T010;Zm00001d012979_T011;Zm00001d012979_T012;Zm00001d012979_T013;Zm00001d012979_T014;Zm00001d012979_T015;Zm00001d012979_T016;Zm00001d012979_T017;Zm00001d012979_T018;Zm00001d012979_T019;Zm00001d012979_T020…	GO:0005515(protein binding);GO:0006355(regulation of transcription, DNA-templated);GO:0016020(membrane);GO:0016021(integral component of membrane);GO:0042393(histone binding);GO:0046872(metal ion binding);GO:0046872(metal ion binding)	NA	NA	NA	Pentatricopeptide repeat-containing protein mitochondrial	protein_coding	2.84913	2.15838	3.23721	4.0673	6.89387	5.3102	1.91463	3.21016	2.17089	0.469381	0.706803	0.533004	2.36479	1.30942	1.51962	0.50021	0.557297	0.704723	1782	1382	2081	2084	3404	3425	1182	2379	1511	291	583	416	1734	668	1208	396	366	550
Zm00001d012982	chr5	2772181	2774600	-	Zm00001d012982	Zm00001d012982_T001	GO:0003824(catalytic activity);GO:0016491(oxidoreductase activity);GO:0016616(oxidoreductase activity, acting on the CH-OH group of donors, NAD or NADP as acceptor);GO:0055114(oxidation-reduction process)	NA	NA	NA	NAD(P)-binding Rossmann-fold superfamily protein	protein_coding	0.038402	0.0001	0.151678	0.0001	0.073588	0.0001	0.095478	0.170923	0.0001	28.5121	20.5137	25.9476	11.7094	2.00037	7.39999	64.2644	85.5219	156.163	4	0	15	0	6	0	10	20	0	2691	2591	3099	1319	157	903	7758	8584	18658
Zm00001d013033	chr5	3492135	3493834	-	Zm00001d013033	Zm00001d013033_T001;Zm00001d013033_T002	GO:0009570(chloroplast stroma);GO:0044183(protein folding chaperone);GO:0061077(chaperone-mediated protein folding);GO:0061077(chaperone-mediated protein folding)	NA	NA	NA	Chaperonin-like RbcX protein	protein_coding	3.35862	2.52932	3.68582	77.3438	135.53	96.7361	36.4618	5.3456	36.6784	4.09037	1.86473	3.37939	60.9207	15.9123	68.5499	397.476	318.367	670.093	231	178	261	4363	7362	6866	2473	436	2799	277	169	290	4921	892	5996	34413	22918	57418
Zm00001d013066	chr5	4147202	4148651	+	Zm00001d013066	Zm00001d013066_T001;Zm00001d013066_T002;Zm00001d013066_T003;Zm00001d013066_T004;Zm00001d013066_T005;Zm00001d013066_T006;Zm00001d013066_T007;Zm00001d013066_T008	GO:0000786(nucleosome);GO:0003677(DNA binding);GO:0003690(double-stranded DNA binding);GO:0005634(nucleus);GO:0005694(chromosome);GO:0006334(nucleosome assembly);GO:0006355(regulation of transcription, DNA-templated);GO:0016584(nucleosome positioning);GO:0030261(chromosome condensation);GO:0031492(nucleosomal DNA binding);GO:0031936(negative regulation of chromatin silencing);GO:0042025(host cell…	NA	K11275	NA	Histone H1	protein_coding	146.866	70.4671	181.103	9.13146	15.5917	14.4544	44.0841	45.8221	42.7953	70.9027	102.649	155.246	19.606	23.0982	36.8201	45.3887	56.6882	210.334	11435	5601	14474	584	960	1163	3387	4227	3699	5437	10532	15061	1794	1467	3649	4452	4623	20417
Zm00001d013130	chr5	5228815	5231062	-	bHLH-transcription factor 60	Zm00001d013130_T001;Zm00001d013130_T002	GO:0005634(nucleus);GO:0046983(protein dimerization activity);GO:0046983(protein dimerization activity)	NA	NA	NA	Transcription factor PIF4	protein_coding	0.592225	1.26396	1.64623	12.6732	19.0484	11.4964	40.4038	2.65669	25.2827	0.489495	1.05982	0.869115	6.76946	3.77253	5.84003	0.892976	0.381424	2.29626	56	121	158	972	1407	1109	3723	295	2621	46	131	102	743	288	694	106	38	269
Zm00001d013175	chr5	5935831	5936304	-	Zm00001d013175	Zm00001d013175_T001	NA	NA	NA	NA		protein_coding	3.20656	5.37565	2.44604	11.0656	26.5246	13.5261	4.48514	11.3944	3.54695	0.0001	0.201508	0.615359	8.33535	1.999	2.36496	0.108895	0.705832	0.607906	88	150	69	248	571	381	121	368	108	0	8	21	267	45	82	4	21	21
Zm00001d013231	chr5	6795974	6799658	-	Zm00001d013231	Zm00001d013231_T001	GO:0004497(monooxygenase activity);GO:0005506(iron ion binding);GO:0016020(membrane);GO:0016021(integral component of membrane);GO:0016491(oxidoreductase activity);GO:0016705(oxidoreductase activity, acting on paired donors, with incorporation or reduction of molecular oxygen);GO:0016709(oxidoreductase activity, acting on paired donors, with incorporation or reduction of molecular oxygen, NAD(P)H…	NA	NA	NA	cytochrome P450 family 81 subfamily D polypeptide 8	protein_coding	0.471443	0.37189	0.547005	85.294	82.8512	101.514	23.6197	6.53984	24.5806	0.275384	0.13972	0.0001	4.81059	3.53834	2.48124	0.0001	0.04658	0.157981	36	29	43	5338	4993	7994	1777	591	2081	21	15	0	432	221	241	0	4	16
Zm00001d013263	chr5	7387191	7388959	-	Zm00001d013263	Zm00001d013263_T001	GO:0030001(metal ion transport);GO:0046872(metal ion binding)	NA	NA	NA	Expressed protein; protein	protein_coding	7.67044	9.7722	1.22642	1.66782	2.81459	3.45761	0.531664	37.4945	0.412634	1.24242	3.28986	2.34206	1.05344	0.0001	0.305085	0.702663	2.48222	0.728115	509	662	84	91	148	237	35	2947	31	82	288	194	83	0	26	59	173	61
Zm00001d013289	chr5	7919330	7920532	-	Zm00001d013289	Zm00001d013289_T001	GO:0016020(membrane);GO:0016021(integral component of membrane)	NA	NA	NA	Transmembrane BAX inhibitor motif-containing protein 4	protein_coding	0.146148	0.163996	0.0001	9.72426	14.6859	17.7014	4.79733	1.95046	5.36472	0.0001	0.382326	0.588916	2.43881	1.76294	2.03945	3.38932	7.16403	36.7779	10	11	0	492	716	1127	292	143	367	0	32	46	177	89	160	264	463	2825
Zm00001d013302	chr5	8065262	8071957	+	Aux/IAA-transcription factor 21	Zm00001d013302_T002;Zm00001d013302_T003;Zm00001d013302_T004;Zm00001d013302_T005	GO:0005515(protein binding);GO:0005634(nucleus);GO:0006351(transcription, DNA-templated);GO:0006355(regulation of transcription, DNA-templated);GO:0009734(auxin-activated signaling pathway);GO:0009734(auxin-activated signaling pathway)	04075(Plant hormone signal transduction);04075(Plant hormone signal transduction)	K14484	NA	Auxin-responsive protein IAA14	protein_coding	4.05389	6.72966	2.06964	2.18045	6.11342	1.82071	2.78818	6.12461	4.7657	0.61019	0.868546	0.598841	0.0001	0.0001	0.0664646	0.636216	0.30872	1.13992	1020	1729	535	451	1216	473	693	1826	1331	152	289	188	0	0	22	202	82	358
Zm00001d013390	chr5	10261470	10264213	-	Zm00001d013390	Zm00001d013390_T001	GO:0004553(hydrolase activity, hydrolyzing O-glycosyl compounds);GO:0005975(carbohydrate metabolic process);GO:0016787(hydrolase activity);GO:0046658(anchored component of plasma membrane)	NA	NA	NA	Glucan endo-1%2C3-beta-glucosidase 7	protein_coding	5.17248	3.2522	1.70665	21.7453	35.1859	54.8214	10.2398	5.36559	4.7771	1.84972	3.0868	3.90209	10.353	5.23535	10.2814	5.73149	12.975	48.2891	525	337	178	1809	2819	5738	1024	645	538	185	413	493	1233	433	1326	732	1378	6102
Zm00001d013406	chr5	10497408	10501324	+	Zm00001d013406	Zm00001d013406_T001;Zm00001d013406_T002	GO:0016020(membrane);GO:0016298(lipase activity);GO:0016787(hydrolase activity);GO:0016787(hydrolase activity)	NA	NA	NA	alpha/beta-Hydrolases superfamily protein	protein_coding	0.896438	0.336486	1.13671	67.1144	56.1273	143.622	17.1302	5.00061	10.0418	1.38051	0.420893	0.509589	74.8945	23.6848	23.9202	58.8321	27.471	240.597	105	41	137	6449	5194	17364	1979	694	1305	160	65	75	10304	2262	3564	8677	3369	35118
Zm00001d013439	chr5	11379034	11392286	+	Zm00001d013439	Zm00001d013439_T001;Zm00001d013439_T002;Zm00001d013439_T003;Zm00001d013439_T004;Zm00001d013439_T005;Zm00001d013439_T006;Zm00001d013439_T007;Zm00001d013439_T008;Zm00001d013439_T009;Zm00001d013439_T010;Zm00001d013439_T012;Zm00001d013439_T013;Zm00001d013439_T014;Zm00001d013439_T015	GO:0000166(nucleotide binding);GO:0000786(nucleosome);GO:0003677(DNA binding);GO:0004672(protein kinase activity);GO:0004674(protein serine/threonine kinase activity);GO:0005524(ATP binding);GO:0005634(nucleus);GO:0006334(nucleosome assembly);GO:0006468(protein phosphorylation);GO:0016301(kinase activity);GO:0016310(phosphorylation);GO:0016740(transferase activity);GO:0018105(peptidyl-serine phos…	NA	NA	NA	Probable serine/threonine protein kinase IREH1	protein_coding	2.15186	1.81666	2.34571	3.66352	5.18421	4.04861	5.09582	2.28236	5.32318	0.0940804	0.256664	0.113234	0.922928	0.596401	0.691674	0.5266	0.458835	0.636705	573	493	641	797	1086	1108	1334	719	1566	25	90	38	287	129	233	176	128	211
Zm00001d013489	chr5	12657966	12661040	+	Zm00001d013489	Zm00001d013489_T001	GO:0000350(generation of catalytic spliceosome for second transesterification step);GO:0005681(spliceosomal complex);GO:0005682(U5 snRNP);GO:0008380(RNA splicing);GO:0046540(U4/U6 x U5 tri-snRNP complex);GO:0071021(U2-type post-spliceosomal complex);GO:0071048(nuclear retention of unspliced pre-mRNA at the site of transcription)	03040(Spliceosome)	K12817	NA	splicing factor Prp18 family protein	protein_coding	0.021506	0.333439	0.375778	7.75041	10.7129	19.2896	0.827817	0.083178	0.828846	0.929483	2.05862	1.66379	6.15423	2.79958	3.72846	29.5133	26.0528	73.8631	2	26	30	486	647	1521	63	8	71	70	207	159	552	175	363	2837	2083	7027
Zm00001d013507	chr5	12959336	12964908	-	Zm00001d013507	Zm00001d013507_T001	GO:0000166(nucleotide binding);GO:0005524(ATP binding);GO:0005737(cytoplasm);GO:0006457(protein folding);GO:0006986(response to unfolded protein);GO:0009507(chloroplast);GO:0016887(ATPase activity);GO:0031072(heat shock protein binding);GO:0034605(cellular response to heat);GO:0034620(cellular response to unfolded protein);GO:0042026(protein refolding);GO:0042623(ATPase activity, coupled);GO:0044…	03040(Spliceosome);04141(Protein processing in endoplasmic reticulum);04144(Endocytosis)	K03283	NA	Heat shock 70 kDa protein 6 chloroplastic	protein_coding	13.0832	9.51355	4.18569	9.23283	17.3642	22.3622	2.90002	7.27156	2.42866	6.56874	12.4456	7.12636	4.9314	2.7897	3.17023	7.85052	10.709	36.5363	1884	1399	619	1092	1977	3326	413	1241	389	932	2362	1279	835	328	581	1425	1616	6560
Zm00001d013572	chr5	14483284	14513180	+	Zm00001d013572	Zm00001d013572_T001	GO:0004672(protein kinase activity);GO:0004674(protein serine/threonine kinase activity);GO:0005524(ATP binding);GO:0005886(plasma membrane);GO:0006468(protein phosphorylation);GO:0016020(membrane);GO:0016021(integral component of membrane);GO:0016301(kinase activity);GO:0016310(phosphorylation)	NA	NA	NA	Cysteine-rich receptor-like protein kinase 10	protein_coding	0.0192	0.119879	0.091827	0.747018	0.457051	0.604373	1.57094	0.19342	0.796475	1.62718	3.08801	2.37466	8.24928	5.55538	8.23157	1.57081	2.17347	3.37497	4	24	18	117	69	119	295	44	169	305	775	563	1845	863	1994	377	434	801
Zm00001d013596	chr5	15094771	15095668	-	GNAT-transcription factor 22	Zm00001d013596_T001	GO:0008080(N-acetyltransferase activity);GO:0016740(transferase activity);GO:0016746(transferase activity, transferring acyl groups);GO:0016747(transferase activity, transferring acyl groups other than amino-acyl groups)	NA	NA	NA	Acyl-CoA N-acyltransferases (NAT) superfamily protein	protein_coding	18.6792	7.80659	11.9412	115.336	124.436	196.26	40.6928	15.6009	35.3681	2.47898	1.65336	1.25473	5.48642	5.06644	9.46577	0.68846	0.691286	1.01895	873	373	573	4424	4597	9473	1877	864	1835	115	102	74	302	194	563	41	34	60
Zm00001d013632	chr5	15872556	15875767	-	Zm00001d013632	Zm00001d013632_T001	GO:0003723(RNA binding);GO:0006353(DNA-templated transcription, termination);GO:0006355(regulation of transcription, DNA-templated);GO:0009507(chloroplast);GO:0016020(membrane);GO:0016021(integral component of membrane)	NA	NA	NA	antitermination NusB domain-containing protein	protein_coding	29.3415	36.1199	41.3414	9.60383	12.6579	14.1704	20.0064	33.9619	27.4021	13.3209	14.2117	11.7913	4.65627	3.53395	6.65996	4.67498	2.48723	6.69523	2378	2988	3438	639	811	1186	1600	3260	2465	1063	1518	1191	444	234	687	478	212	677
Zm00001d013639	chr5	15998846	16001615	+	Zm00001d013639	Zm00001d013639_T001	NA	NA	NA	NA	DnaJ/Hsp40 cysteine-rich domain superfamily protein	protein_coding	4.59304	6.48554	8.45518	3.39165	4.47785	4.17182	5.11367	5.02561	5.53165	0.966134	2.83843	0.911541	0.410638	0.407796	0.172323	0.692871	1.11084	1.14134	258	371	486	156	199	242	283	334	344	54	210	64	28	19	13	49	66	80
Zm00001d013669	chr5	16901324	16905867	-	Zm00001d013669	Zm00001d013669_T001;Zm00001d013669_T002;Zm00001d013669_T003;Zm00001d013669_T004;Zm00001d013669_T005;Zm00001d013669_T006	GO:0005524(ATP binding);GO:0005829(cytosol);GO:0006457(protein folding);GO:0009408(response to heat);GO:0031072(heat shock protein binding);GO:0046872(metal ion binding);GO:0051082(unfolded protein binding);GO:0051082(unfolded protein binding)	NA	NA	NA	Chaperone protein dnaJ 3	protein_coding	26.3474	22.8197	23.9663	166.497	317.871	316.035	218.562	89.9323	176.27	11.5461	22.4129	10.289	122.986	108.844	126.292	21.1239	20.58	38.0619	2876	2543	2687	14908	27408	35605	23525	11625	21347	1242	3224	1399	15767	9686	17533	2904	2353	5179
Zm00001d013713	chr5	18274806	18283480	-	Zm00001d013713	Zm00001d013713_T001;Zm00001d013713_T002;Zm00001d013713_T003	GO:0005739(mitochondrion);GO:0016226(iron-sulfur cluster assembly);GO:0032981(mitochondrial respiratory chain complex I assembly);GO:0051539(4 iron, 4 sulfur cluster binding);GO:0051539(4 iron, 4 sulfur cluster binding)	NA	NA	NA	Nucleotide-binding protein-like	protein_coding	0.0001	0.0001	0.0001	0.0547136	0.0001	0.0001	0.0001	0.039965	0.0001	6.12031	4.003	6.663	21.126	11.1048	12.8034	8.22505	6.63527	10.5832	0	0	0	4	0	0	0	4	0	480	421	661	1972	721	1296	825	553	1049
Zm00001d013716	chr5	18304702	18308806	-	Zm00001d013716	Zm00001d013716_T001;Zm00001d013716_T002;Zm00001d013716_T003;Zm00001d013716_T006;Zm00001d013716_T007	GO:0000151(ubiquitin ligase complex);GO:0000209(protein polyubiquitination);GO:0004842(ubiquitin-protein transferase activity);GO:0005737(cytoplasm);GO:0006511(ubiquitin-dependent protein catabolic process);GO:0016567(protein ubiquitination);GO:0016740(transferase activity);GO:0016874(ligase activity);GO:0031624(ubiquitin conjugating enzyme binding);GO:0032436(positive regulation of proteasomal u…	NA	K11968	EC:2.3.2.31	Probable E3 ubiquitin-protein ligase ARI2	protein_coding	1.92528	1.00067	1.66075	35.9536	53.4513	62.5932	7.29257	2.16635	9.68079	0.848963	1.23983	0.984189	3.77676	1.3632	5.13909	0.666558	1.4119	2.32541	401	212	354	6122	8766	13411	1494	534	2231	174	340	257	922	232	1359	175	309	603
Zm00001d013721	chr5	18529927	18533146	-	Zm00001d013721	Zm00001d013721_T001;Zm00001d013721_T002;Zm00001d013721_T003;Zm00001d013721_T004;Zm00001d013721_T005;Zm00001d013721_T006;Zm00001d013721_T007;Zm00001d013721_T008;Zm00001d013721_T009;Zm00001d013721_T010	NA	NA	NA	NA		protein_coding	8.47667	10.2094	8.227	4.10156	4.77219	6.61436	8.76169	9.25079	7.02185	6.1051	6.90142	4.21771	2.26072	1.82755	1.98843	2.1409	2.73057	4.11842	1532	1884	1527	610	685	1237	1564	1981	1411	1088	1644	952	484	272	460	490	520	930
Zm00001d013736	chr5	18918646	18921698	+	SnRK2 serine threonine kinase10	Zm00001d013736_T001	GO:0000166(nucleotide binding);GO:0004672(protein kinase activity);GO:0004674(protein serine/threonine kinase activity);GO:0005524(ATP binding);GO:0005634(nucleus);GO:0005737(cytoplasm);GO:0006468(protein phosphorylation);GO:0016301(kinase activity);GO:0016310(phosphorylation);GO:0035556(intracellular signal transduction)	04016(MAPK signaling pathway - plant);04075(Plant hormone signal transduction)	K14498	EC:2.7.11.1	Serine/threonine-protein kinase SRK2E	protein_coding	59.1191	67.7913	65.5887	18.1917	25.8065	27.4729	20.8369	45.1688	21.7833	27.8194	36.5954	37.4773	7.96304	8.7714	11.7032	5.33381	4.1511	5.57069	6884	8059	7840	1739	2375	3304	2394	6232	2816	3191	5616	5438	1090	834	1735	783	507	809
Zm00001d013857	chr5	22848194	22852125	-	Zm00001d013857	Zm00001d013857_T001;Zm00001d013857_T002;Zm00001d013857_T003;Zm00001d013857_T004;Zm00001d013857_T005;Zm00001d013857_T006;Zm00001d013857_T007;Zm00001d013857_T008;Zm00001d013857_T009;Zm00001d013857_T010	NA	NA	NA	NA		protein_coding	0.606098	0.278702	0.519145	3.04197	9.33899	10.484	4.02371	2.95874	3.38123	0.375221	1.11134	0.814375	3.09717	2.06359	1.92697	29.5427	16.4758	20.4039	134	63	117	537	1577	2312	850	751	804	82	316	220	782	364	528	7940	3684	5429
Zm00001d013907	chr5	24372950	24373240	+	Zm00001d013907	Zm00001d013907_T001	GO:0006869(lipid transport)	NA	NA	NA	Nonspecific lipid-transfer protein	protein_coding	3.01253	0.787207	0.0001	828.532	2874.4	1507.88	135.679	9.94677	111.496	2.38059	9.48593	9.2356	6261.48	3820.57	2453.07	39.4053	48.6976	712.701	51	14	0	11362	37958	26018	2237	197	2068	40	209	193	122938	52066	52158	830	853	14847
Zm00001d013956	chr5	26132024	26133283	+	tonoplast intrinsic protein3	Zm00001d013956_T001;Zm00001d013956_T002;Zm00001d013956_T003;Zm00001d013956_T004	GO:0005773(vacuole);GO:0005774(vacuolar membrane);GO:0006833(water transport);GO:0015250(water channel activity);GO:0015267(channel activity);GO:0016020(membrane);GO:0016021(integral component of membrane);GO:0032586(protein storage vacuole membrane);GO:0055085(transmembrane transport);GO:0055085(transmembrane transport)	NA	K09873	NA	tonoplast intrinsic protein3	protein_coding	0.0001	0.0001	0.0001	11.0628	16.2708	142.895	3.61032	0.190757	0.151812	0.114742	0.772567	0.542841	444.572	147.303	81.0944	1.22392	0.587472	77.3967	0	0	0	607	856	9821	238	16	12	8	68	47	34767	7996	6869	103	41	6423
Zm00001d014070	chr5	31457625	31457870	-	Zm00001d014070	Zm00001d014070_T001	NA	NA	NA	NA		protein_coding	0.266208	0.260775	0.0001	0.432479	1.41536	0.128891	0.0001	0.0001	0.0001	0.0001	0.201299	0.427304	6.50288	2.58789	3.8618	20.6068	16.2824	67.152	4	4	0	6	16	2	0	0	0	0	4	8	108	30	70	367	241	1183
Zm00001d014193	chr5	35940270	35941490	-	Zm00001d014193	Zm00001d014193_T001	GO:0009638(phototropism)	NA	NA	NA		protein_coding	2.82948	5.18129	4.88014	1.2449	4.89728	2.07691	27.2615	5.51895	17.8881	5.80746	14.2485	15.4185	1.35305	0.328086	1.14257	57.1253	55.3877	35.6934	199	371	352	72	272	151	1886	459	1392	401	1317	1347	112	19	102	5045	4068	3120
Zm00001d014309	chr5	40501751	40504609	+	Zm00001d014309	Zm00001d014309_T001	NA	NA	NA	NA		protein_coding	0.658864	0.609643	0.491594	2.39318	3.2545	3.83571	1.04713	0.153209	1.2825	0.0001	0.155033	0.09724	1.19082	0.916826	1.16378	0.0001	0.0001	0.0001	41	39	32	122	160	246	65	12	89	0	13	8	87	47	92	0	0	0
Zm00001d014317	chr5	40685899	40686909	-	Zm00001d014317	Zm00001d014317_T001	NA	NA	NA	NA		protein_coding	239.961	235.173	260.216	29.0412	32.8247	19.4484	111.537	43.6843	137.699	221.926	344.741	295.019	57.3461	79.5098	109.216	366.983	392.057	363.298	11408	11414	12699	1134	1234	955	5232	2461	7267	10391	21597	17476	3204	3084	6608	21978	19523	21534
Zm00001d014451	chr5	47928633	47933975	+	Zm00001d014451	Zm00001d014451_T001;Zm00001d014451_T002	GO:0004970(ionotropic glutamate receptor activity);GO:0005886(plasma membrane);GO:0006811(ion transport);GO:0015276(ligand-gated ion channel activity);GO:0016020(membrane);GO:0016021(integral component of membrane);GO:0034220(ion transmembrane transport);GO:0038023(signaling receptor activity);GO:0038023(signaling receptor activity)	NA	K05387	NA	Glutamate receptor 3.4	protein_coding	4.46106	6.17222	5.8268	0.354729	0.234119	1.38064	3.9665	5.64099	5.36789	1.766	0.669691	0.913354	0.132994	0.0435055	0.251266	0.236686	0.179425	0.0635839	947	1336	1269	62	40	303	830	1418	1264	369	188	242	34	8	69	65	41	17
Zm00001d014486	chr5	49915116	49917898	+	Zm00001d014486	Zm00001d014486_T001;Zm00001d014486_T002;Zm00001d014486_T003;Zm00001d014486_T004;Zm00001d014486_T005	GO:0003824(catalytic activity);GO:0010286(heat acclimation);GO:0010608(posttranscriptional regulation of gene expression);GO:0010608(posttranscriptional regulation of gene expression)	NA	NA	NA	Phosphosulfolactate synthase-related protein	protein_coding	3.43722	2.90518	2.0735	18.9836	41.4066	48.8892	7.69731	4.58629	5.7114	0.755062	2.38692	1.65225	13.8983	10.3737	11.4802	19.6249	18.4534	83.8239	280	241	173	1266	2657	4100	617	442	515	61	257	168	1327	687	1187	2009	1571	8486
Zm00001d014600	chr5	54830497	54831807	-	Zm00001d014600	Zm00001d014600_T001	GO:0005783(endoplasmic reticulum);GO:0016020(membrane);GO:0016021(integral component of membrane);GO:0034599(cellular response to oxidative stress);GO:0071470(cellular response to osmotic stress)	NA	NA	NA	uncharacterized protein [Source:UniProtKB/TrEMBL;Acc:B6TPR0]	protein_coding	232.143	205.494	198.046	170.128	258.096	214.461	177.586	199.868	234.04	160	201.509	185.369	88.9219	41.9994	104.471	706.308	644.106	666.181	12903	11659	11299	7761	11338	12309	9738	13162	14439	8759	14759	12837	5808	1904	7390	49452	37496	46162
Zm00001d014666	chr5	58166000	58167433	+	Zm00001d014666	Zm00001d014666_T001	GO:0005515(protein binding);GO:0009451(RNA modification);GO:0043231(intracellular membrane-bounded organelle)	NA	NA	NA	Pentatricopeptide repeat-containing protein	protein_coding	1.67156	1.88508	1.63488	2.37372	2.54462	1.73104	2.72198	2.05143	4.28016	1.84091	1.9423	1.994	16.37	8.07801	10.0692	0.155677	0.284021	0.894421	138	159	139	161	166	148	222	201	392	150	211	205	1584	543	1056	17	25	92
Zm00001d014764	chr5	62108780	62114128	-	Zm00001d014764	Zm00001d014764_T002;Zm00001d014764_T003;Zm00001d014764_T004;Zm00001d014764_T005;Zm00001d014764_T006;Zm00001d014764_T008;Zm00001d014764_T010;Zm00001d014764_T013	NA	NA	NA	NA		protein_coding	1.13124	1.17455	1.1535	3.83868	7.28066	4.729	1.57672	1.03206	1.87818	0.761541	0.8794	0.927985	2.49841	1.84441	2.37969	0.313823	0.107519	0.64143	349	370	366	969	1769	1503	480	377	641	233	357	356	904	463	932	122	35	246
Zm00001d014990	chr5	71267717	71268967	-	Zm00001d014990	Zm00001d014990_T001	GO:0005515(protein binding);GO:0010224(response to UV-B)	NA	NA	NA	WD repeat-containing protein RUP2	protein_coding	31.1424	47.6587	39.3154	1.81962	2.73177	1.33936	4.57797	9.27634	3.85233	22.5738	28.5786	44.3847	0.95033	0.253534	0.9146	33.1759	27.7564	32.2537	2237	3495	2899	108	156	100	325	790	308	1597	2705	3973	81	15	84	3002	2089	2889
Zm00001d015091	chr5	75192664	75194979	+	Zm00001d015091	Zm00001d015091_T001;Zm00001d015091_T002;Zm00001d015091_T003;Zm00001d015091_T004	GO:0016020(membrane);GO:0016021(integral component of membrane);GO:0016021(integral component of membrane)	NA	NA	NA	Bax inhibitor 1	protein_coding	1.37988	1.14772	0.34702	2.91996	2.9788	9.01224	6.27917	1.78324	2.55086	2.62929	5.84419	3.7421	424.575	467.978	957.126	22.0118	19.002	99.3514	135	114	35	232	228	899	599	205	275	251	744	451	48127	36821	117490	2677	1922	11950
Zm00001d015175	chr5	78399660	78402994	-	Zm00001d015175	Zm00001d015175_T001;Zm00001d015175_T002;Zm00001d015175_T003	GO:0016020(membrane);GO:0016021(integral component of membrane);GO:0016021(integral component of membrane)	NA	NA	NA	Phosphatidylinositol/phosphatidylcholine transfer protein SFH10	protein_coding	1.16497	0.976431	1.72925	0.680114	1.38007	1.62203	2.02102	1.12724	1.56692	0.510066	0.272399	0.612125	0.056444	0.0630954	0.242185	0.120533	0.0126743	0.135428	171	146	260	82	160	245	292	196	255	74	53	112	10	8	46	23	2	25
Zm00001d015219	chr5	79960119	79963951	-	Zm00001d015219	Zm00001d015219_T001	NA	NA	NA	NA		protein_coding	0.197917	0.0001	0.025952	0.392084	0.227301	1.03882	0.0001	0.109682	0.385885	6.87344	6.30103	7.45948	2.3337	1.37948	2.14096	1.52356	1.39257	2.73796	16	0	3	26	14	84	0	11	34	528	647	724	214	88	213	150	114	266
Zm00001d015226	chr5	80066943	80069666	-	G2-like-transcription factor 18	Zm00001d015226_T001	GO:0003677(DNA binding);GO:0005634(nucleus)	NA	NA	NA	Myb family transcription factor PHL6	protein_coding	5.13396	6.54366	7.27468	5.31317	6.32979	7.71628	16.9339	8.20692	20.7069	0.578734	0.37252	0.672314	2.47959	1.28375	3.22565	0.75802	0.283287	2.0959	571	743	830	485	556	886	1857	1081	2554	64	55	94	324	117	457	107	33	291
Zm00001d015242	chr5	80675439	80680775	+	Zm00001d015242	Zm00001d015242_T001;Zm00001d015242_T002;Zm00001d015242_T003;Zm00001d015242_T005;Zm00001d015242_T006	NA	NA	NA	NA	AIG2-like protein	protein_coding	0.0633353	0.0182093	0.0001	0.0001	0.028883	0.0182628	0.047272	0.10678	0.0121644	7.12416	4.09887	3.81069	1.66176	1.32294	3.20149	4.56108	3.99126	5.01656	20	8	0	0	7	6	15	38	4	2075	1598	1405	578	320	1206	1699	1237	1850
Zm00001d015308	chr5	83966625	83970693	-	Zm00001d015308	Zm00001d015308_T001;Zm00001d015308_T002;Zm00001d015308_T003	NA	NA	NA	NA		protein_coding	4.5809	2.82628	3.16511	7.32992	8.46981	14.5678	5.60944	2.7759	4.91524	1.71917	2.37943	0.772309	5.90759	3.71374	4.0382	6.06396	8.81677	21.0335	1041	656	739	1367	1522	3418	1259	748	1240	386	713	219	1577	688	1168	1736	2098	5957
Zm00001d015496	chr5	93747095	93751463	+	Zm00001d015496	Zm00001d015496_T001;Zm00001d015496_T002	NA	NA	NA	NA		protein_coding	0.0001	0.0001	0.0001	0.0001	0.0001	0.0001	0.0001	0.0001	0.0001	20.0268	15.5375	18.5512	39.0975	32.1458	42.9343	9.04512	5.57734	14.3126	0	0	0	0	0	0	0	0	0	1156	1200	1355	2692	1537	3201	668	343	1046
Zm00001d015550	chr5	96947403	96947708	-	Zm00001d015550	Zm00001d015550_T001	NA	NA	NA	NA		protein_coding	1.35692	0.383602	0.752619	31.5316	42.1693	79.8789	26.6234	6.15987	39.0843	0.0001	2.58292	1.19318	13.5477	11.2081	16.3012	0.422305	0.590509	1.38783	24	7	14	455	586	1450	462	129	763	0	60	27	280	161	365	10	11	31
Zm00001d015578	chr5	99040396	99041931	-	Zm00001d015578	Zm00001d015578_T001	GO:0004497(monooxygenase activity);GO:0005506(iron ion binding);GO:0016020(membrane);GO:0016491(oxidoreductase activity);GO:0016705(oxidoreductase activity, acting on paired donors, with incorporation or reduction of molecular oxygen);GO:0016709(oxidoreductase activity, acting on paired donors, with incorporation or reduction of molecular oxygen, NAD(P)H as one donor, and incorporation of one ato…	NA	NA	NA	Cytochrome P450 71D8	protein_coding	0.089734	0.173463	0.0001	0.26528	0.0001	0.130418	2.33523	0.366573	0.040206	0.768927	0.337696	0.244708	6.74366	3.08847	5.97069	7.05089	2.96063	4.86289	8	15	0	19	0	12	193	37	4	64	38	26	663	211	636	744	260	508
Zm00001d015634	chr5	102221922	102239302	-	Zm00001d015634	Zm00001d015634_T001;Zm00001d015634_T002	NA	NA	NA	NA		protein_coding	0.0001	0.160865	0.0397303	0.0001	0.0001	0.0001	0.0001	0.0680519	0.0001	0.561942	1.4075	1.54947	4.8302	3.05397	4.88517	1.96836	1.69091	2.61125	0	21	6	0	0	0	0	10	0	69	228	238	698	307	765	305	218	401
Zm00001d015671	chr5	105092463	105093878	-	Homeobox-transcription factor 27	Zm00001d015671_T001	GO:0016567(protein ubiquitination);GO:0016874(ligase activity);GO:0061630(ubiquitin protein ligase activity)	NA	NA	NA	Probable E3 ubiquitin-protein ligase LOG2	protein_coding	26.5417	24.9064	26.9439	11.4211	17.2972	17.7514	32.5267	29.947	32.1902	2.29018	3.45797	4.29707	0.659584	1.35592	2.81342	3.95767	6.34497	4.38598	1691	1619	1762	597	871	1168	2044	2260	2276	144	291	341	50	71	228	318	424	349
Zm00001d015737	chr5	114786885	114788112	-	Zm00001d015737	Zm00001d015737_T001;Zm00001d015737_T002	GO:0046872(metal ion binding);GO:0046872(metal ion binding)	NA	NA	NA	Ran BP2/NZF zinc finger-like superfamily protein	protein_coding	0.691737	4.60992	15.6416	7.92689	44.2789	3.40331	18.7236	2.91328	37.0982	0.93449	2.41481	1.05073	59.942	35.5392	54.4257	0.997953	0.299258	3.01241	42	280	955	387	2080	209	1098	206	2448	55	190	78	4186	1723	4117	75	19	224
Zm00001d015779	chr5	118773282	118856166	+	Zm00001d015779	Zm00001d015779_T001	GO:0019904(protein domain specific binding)	NA	NA	NA	14-3-3-like protein GF14 omega	protein_coding	0.258542	0.228554	0.360166	3.1128	2.45127	3.95784	1.90687	0.59999	2.56118	0.107293	0.112717	0.299805	1.68512	1.04604	0.938187	0.0001	0.0001	0.0646	33	30	47	322	244	515	237	90	358	14	19	48	250	108	151	0	0	11
Zm00001d015798	chr5	121139511	121146584	+	Zm00001d015798	Zm00001d015798_T001;Zm00001d015798_T002	GO:0004252(serine-type endopeptidase activity);GO:0006508(proteolysis);GO:0008233(peptidase activity);GO:0008236(serine-type peptidase activity);GO:0016787(hydrolase activity);GO:0016787(hydrolase activity)	NA	NA	NA	Subtilisin-like protease SBT5.3	protein_coding	15.1054	15.6785	9.80687	2.99825	4.02674	5.07705	4.71799	12.8127	3.56075	13.1644	31.6995	33.3574	2.02642	0.726906	1.97431	0.333643	0.356259	0.273704	2579	2732	1719	421	544	895	795	2591	676	2214	7129	7093	407	102	430	72	64	59
Zm00001d015877	chr5	127778392	127778829	+	Zm00001d015877	Zm00001d015877_T001	NA	NA	NA	NA		protein_coding	8.57533	4.96052	5.69034	168.154	196.1	294.837	85.8634	24.4999	131.976	0.421515	0.40878	0.365946	5.98265	2.15746	1.63526	0.0001	0.0001	0.350411	216	128	147	3471	3898	7657	2131	730	3684	11	14	12	177	45	53	0	0	11
Zm00001d015917	chr5	131162542	131163113	-	Zm00001d015917	Zm00001d015917_T001	GO:0003723(RNA binding);GO:0003743(translation initiation factor activity);GO:0006412(translation);GO:0006413(translational initiation)	03013(RNA transport)	K03236	NA	Nucleic acid-binding OB-fold-like protein	protein_coding	4.32091	0.851875	2.23698	8.50686	8.79823	22.1548	45.1383	17.1897	50.6659	11.5784	21.8641	29.9865	60.2672	39.6325	88.5135	80.9642	95.5264	90.0434	142	29	76	230	229	752	1463	669	1847	375	947	1228	2326	1062	3700	3350	3286	3687
Zm00001d016349	chr5	158778717	158783175	+	Zm00001d016349	Zm00001d016349_T001;Zm00001d016349_T002;Zm00001d016349_T003;Zm00001d016349_T004;Zm00001d016349_T005;Zm00001d016349_T006;Zm00001d016349_T007;Zm00001d016349_T008;Zm00001d016349_T009;Zm00001d016349_T010	GO:0003676(nucleic acid binding);GO:0003723(RNA binding);GO:0003727(single-stranded RNA binding);GO:0003729(mRNA binding);GO:0003730(mRNA 3'-UTR binding);GO:0005654(nucleoplasm);GO:0005737(cytoplasm);GO:0016020(membrane);GO:0016021(integral component of membrane);GO:0051252(regulation of RNA metabolic process);GO:1990904(ribonucleoprotein complex);GO:1990904(ribonucleoprotein complex)	03040(Spliceosome);03040(Spliceosome)	K12741	NA	RNA-binding (RRM/RBD/RNP motifs) family protein	protein_coding	14.3135	12.8741	13.4131	20.5372	27.1095	29.9332	21.5193	14.8559	20.6498	4.09867	5.50415	4.92958	15.1632	10.626	12.8659	4.26697	2.91662	5.88315	3137	2879	3017	3693	4695	6771	4651	3855	5021	886	1591	1348	3904	1902	3588	1179	673	1607
Zm00001d016371	chr5	159620927	159627681	+	Zm00001d016371	Zm00001d016371_T001	GO:0005654(nucleoplasm);GO:0005739(mitochondrion)	NA	NA	NA		protein_coding	9.34089	6.06608	6.04085	5.17874	6.39173	7.94916	9.68664	4.43409	8.79781	5.27634	5.44761	6.55517	19.9106	11.935	22.4586	45.2481	31.9983	21.7503	442	293	294	201	239	388	452	249	462	246	340	386	1106	460	1351	2694	1584	1282
Zm00001d016588	chr5	168633141	168636493	-	Zm00001d016588	Zm00001d016588_T001;Zm00001d016588_T002;Zm00001d016588_T003;Zm00001d016588_T004;Zm00001d016588_T005;Zm00001d016588_T006	GO:0006629(lipid metabolic process);GO:0008081(phosphoric diester hydrolase activity);GO:0046475(glycerophospholipid catabolic process);GO:0046475(glycerophospholipid catabolic process)	00564(Glycerophospholipid metabolism);00564(Glycerophospholipid metabolism)	K18696	EC:3.1.4.46	Glycerophosphodiester phosphodiesterase GDPD2	protein_coding	9.8426	8.86115	13.2729	234.985	417.001	58.8621	153.529	66.2291	109.677	63.1606	184.759	218.414	1735.66	902.917	699.754	836	742.869	316.514	1624	1494	2249	31805	54349	10025	24981	12942	20077	10261	40150	44877	336332	121443	146843	173662	128307	65075
Zm00001d016625	chr5	170513382	170514256	-	Zm00001d016625	Zm00001d016625_T001	NA	NA	NA	NA	Os02g0519800 protein	protein_coding	13.2248	1.17642	4.85217	29.2284	19.2606	59.9237	27.1756	5.03697	24.3284	10.1403	47.0689	28.599	132.438	118.98	136.356	45.0053	34.2775	42.9999	665	61	251	1206	765	3109	1347	300	1357	502	3117	1791	7819	4876	8718	2849	1804	2694
Zm00001d016698	chr5	172848456	172856742	+	Zm00001d016698	Zm00001d016698_T001	GO:0009785(blue light signaling pathway)	NA	NA	NA		protein_coding	35.2673	24.7146	33.455	7.36596	6.23337	5.62481	15.6182	4.72863	19.0863	30.0536	37.1839	46.1659	1.24019	0.447285	1.27868	85.5281	83.0282	59.3041	2175	1556	2118	373	304	359	951	346	1307	1826	3022	3548	90	23	101	6644	5363	4560
Zm00001d016841	chr5	178195938	178198322	+	Zm00001d016841	Zm00001d016841_T001;Zm00001d016841_T002	GO:0004497(monooxygenase activity);GO:0016020(membrane);GO:0016021(integral component of membrane);GO:0055114(oxidation-reduction process);GO:0071949(FAD binding);GO:0071949(FAD binding)	NA	NA	NA	monooxygenase 1	protein_coding	6.65229	2.49094	2.362	1.2007	5.86252	11.0352	4.13834	3.14213	4.37802	81.6177	187.194	170.126	0.303775	0.35225	0.23168	30.9818	104.825	90.5828	560	215	206	84	391	961	345	314	410	6767	20764	17843	31	25	25	3286	9243	9507
Zm00001d016876	chr5	179111776	179112984	-	Trihelix-transcription factor 24	Zm00001d016876_T001	GO:0000976(transcription regulatory region sequence-specific DNA binding);GO:0005634(nucleus);GO:0043565(sequence-specific DNA binding);GO:0044212(transcription regulatory region DNA binding)	NA	NA	NA	Trihelix transcription factor ASIL2	protein_coding	9.61935	6.26816	8.85775	22.7089	26.2292	30.6076	16.5481	10.3249	21.7035	1.02039	1.85948	1.47776	9.50539	6.32423	5.74522	1.52019	1.36384	3.64975	668	445	632	1294	1440	2195	1134	850	1673	70	171	128	776	359	508	133	100	316
Zm00001d016895	chr5	179608070	179609074	+	Zm00001d016895	Zm00001d016895_T001	GO:0009056(catabolic process);GO:0016787(hydrolase activity)	NA	NA	NA	Gibberellin receptor GID1L2	protein_coding	8.01855	6.1688	5.08104	1.40209	0.939939	0.925229	3.17284	3.67795	2.41191	10.8881	12.9594	14.8666	4.00563	1.51932	3.92056	19.0434	19.5948	28.6041	463	364	301	67	43	56	181	252	155	619	986	1069	272	72	288	1385	1185	2058
Zm00001d016963	chr5	181491931	181500031	+	Zm00001d016963	Zm00001d016963_T001;Zm00001d016963_T002;Zm00001d016963_T003;Zm00001d016963_T004;Zm00001d016963_T005;Zm00001d016963_T006;Zm00001d016963_T007;Zm00001d016963_T008;Zm00001d016963_T009	GO:0003935(GTP cyclohydrolase II activity);GO:0005737(cytoplasm);GO:0008686(3,4-dihydroxy-2-butanone-4-phosphate synthase activity);GO:0009231(riboflavin biosynthetic process);GO:0009507(chloroplast);GO:0009507(chloroplast)	NA	NA	NA	Bifunctional riboflavin biosynthesis protein RIBA 1 chloroplastic	protein_coding	0.0001	0.0001	0.265021	0.19528	0.303176	0.344947	0.180343	0.049	0.241672	0.209741	0.177348	0.099122	1.18571	0.881876	1.73114	0.494514	0.414017	0.790863	0	0	37	22	33	49	25	8	37	28	32	17	189	98	299	85	59	134
Zm00001d016995	chr5	182274146	182288499	+	Zm00001d016995	Zm00001d016995_T001	GO:0003824(catalytic activity);GO:0009234(menaquinone biosynthetic process);GO:0030976(thiamine pyrophosphate binding);GO:0042372(phylloquinone biosynthetic process);GO:0042550(photosystem I stabilization);GO:0070204(2-succinyl-5-enolpyruvyl-6-hydroxy-3-cyclohexene-1-carboxylic-acid synthase activity)	NA	NA	NA	Protein PHYLLO chloroplastic	protein_coding	0.748719	0.621711	0.706475	1.77505	3.42538	2.07289	0.728267	0.317082	1.36231	0.83914	1.56137	0.89708	7.0228	3.98129	4.68491	0.089105	0.05955	0.106282	135	115	131	262	487	385	130	68	272	149	370	201	1484	584	1072	21	12	24
Zm00001d017019	chr5	182804219	182805136	-	Zm00001d017019	Zm00001d017019_T001	NA	NA	NA	NA	ATFP4	protein_coding	5.85609	2.46927	2.51185	9.1926	14.3626	8.81284	7.45674	1.23248	37.3102	17.5126	30.0839	24.4212	3.12848	1.13815	3.24501	1.12233	1.83622	2.16133	271	117	120	349	525	421	341	68	1915	798	1833	1407	170	43	191	66	89	125
Zm00001d017033	chr5	183229185	183230047	+	Zm00001d017033	Zm00001d017033_T001	NA	NA	NA	NA	Glycine-rich cell wall structural protein	protein_coding	4.31138	2.36	0.0001	145.531	13.6704	36.0886	6.60255	4.8084	3.03219	1.50526	2.24375	2.69865	16.6933	4.75496	28.8051	10.1415	9.29225	82.2024	182	102	0	5020	455	1567	274	240	142	63	125	142	825	163	1541	537	410	4308
Zm00001d017120	chr5	185983894	185986953	-	Zm00001d017120	Zm00001d017120_T001;Zm00001d017120_T002;Zm00001d017120_T003;Zm00001d017120_T004;Zm00001d017120_T005	GO:0000166(nucleotide binding);GO:0005524(ATP binding);GO:0005737(cytoplasm);GO:0005829(cytosol);GO:0016226(iron-sulfur cluster assembly);GO:0046872(metal ion binding);GO:0051536(iron-sulfur cluster binding);GO:0051539(4 iron, 4 sulfur cluster binding);GO:0051539(4 iron, 4 sulfur cluster binding)	NA	NA	NA	nuclear binding protein35	protein_coding	9.91098	7.80338	2.64725	24.1888	5.13757	6.4802	19.9377	2.13693	17.3238	6.69841	17.1787	18.6997	233.901	113.226	134.603	50.4979	64.4792	345.334	1076	865	297	2154	442	727	2133	276	2086	716	2457	2527	29796	10014	18569	6897	7323	46674
Zm00001d017270	chr5	191243684	191245128	+	phosphoenolpyruvate carboxylase kinase3	Zm00001d017270_T001	GO:0000166(nucleotide binding);GO:0004672(protein kinase activity);GO:0004674(protein serine/threonine kinase activity);GO:0004683(calmodulin-dependent protein kinase activity);GO:0005516(calmodulin binding);GO:0005524(ATP binding);GO:0005634(nucleus);GO:0005737(cytoplasm);GO:0006468(protein phosphorylation);GO:0009738(abscisic acid-activated signaling pathway);GO:0009931(calcium-dependent protei…	NA	NA	NA	Phosphoenolpyruvate carboxylase kinase 3	protein_coding	4.21008	2.60889	6.81076	0.0001	0.0001	0.0001	13.0812	1.20441	0.994744	14.2929	55.576	82.0939	3.31365	1.08064	7.66399	56.3217	73.4393	42.5254	326	206	540	0	0	0	997	111	86	1088	5656	7900	301	69	754	5480	5941	4095
Zm00001d017336	chr5	193245751	193254587	-	Zm00001d017336	Zm00001d017336_T001;Zm00001d017336_T002;Zm00001d017336_T003;Zm00001d017336_T004;Zm00001d017336_T005;Zm00001d017336_T006;Zm00001d017336_T007	GO:0000502(proteasome complex);GO:0004175(endopeptidase activity);GO:0004298(threonine-type endopeptidase activity);GO:0005634(nucleus);GO:0005737(cytoplasm);GO:0005839(proteasome core complex);GO:0006508(proteolysis);GO:0006511(ubiquitin-dependent protein catabolic process);GO:0008233(peptidase activity);GO:0010498(proteasomal protein catabolic process);GO:0010499(proteasomal ubiquitin-independe…	03050(Proteasome);03050(Proteasome)	K02726	EC:3.4.25.1	Proteasome subunit alpha type-2-B	protein_coding	2.59746	17.7718	3.05084	8.4936	3.85414	9.48379	15.202	2.05342	7.92233	1.25819	2.5009	8.4131	1.53633	0.519452	2.46238	1.43351	0.504773	1.30447	221	1540	267	594	260	832	1274	207	747	106	282	890	155	37	267	154	46	140
Zm00001d017418	chr5	195379356	195383453	-	Zm00001d017418	Zm00001d017418_T001	GO:0004028(3-chloroallyl aldehyde dehydrogenase activity);GO:0006081(cellular aldehyde metabolic process);GO:0016491(oxidoreductase activity);GO:0016620(oxidoreductase activity, acting on the aldehyde or oxo group of donors, NAD or NADP as acceptor);GO:0055114(oxidation-reduction process)	NA	NA	NA	Aldehyde dehydrogenase	protein_coding	1.52917	2.34919	4.67645	0.468634	0.927333	1.12516	3.75915	47.9641	5.59276	3.2445	1.72641	1.06363	0.267217	0.045936	0.0001	0.079465	0.428743	1.07907	146	229	458	37	70	111	354	5420	593	305	217	127	30	4	0	10	43	129
Zm00001d017491	chr5	197432144	197434405	+	Zm00001d017491	Zm00001d017491_T001;Zm00001d017491_T002;Zm00001d017491_T003;Zm00001d017491_T004	GO:0005739(mitochondrion);GO:0005739(mitochondrion)	NA	NA	NA		protein_coding	1.14036	0.484003	0.369071	0.420031	0.207573	0.323334	1.54782	0.531831	0.919121	5.03799	5.23678	3.3645	0.877799	0.916602	1.4403	3.28105	2.69906	3.34931	73	33	24	22	11	21	97	42	66	314	436	264	66	48	117	262	180	263
Zm00001d017526	chr5	198707054	198710453	+	plasma membrane intrinsic protein1	Zm00001d017526_T001;Zm00001d017526_T002;Zm00001d017526_T003;Zm00001d017526_T004;Zm00001d017526_T005	GO:0005515(protein binding);GO:0005773(vacuole);GO:0005783(endoplasmic reticulum);GO:0005829(cytosol);GO:0005886(plasma membrane);GO:0006833(water transport);GO:0009414(response to water deprivation);GO:0009506(plasmodesma);GO:0015250(water channel activity);GO:0015267(channel activity);GO:0016020(membrane);GO:0016021(integral component of membrane);GO:0032991(protein-containing complex);GO:00512…	NA	NA	NA	Aquaporin PIP1-2	protein_coding	56.4734	52.5431	15.9436	168.904	222.663	217.726	127.288	102.257	126.926	11.3753	28.3858	30.9787	70.2721	40.5966	43.9453	121.599	235.852	684.047	4605	4374	1335	11302	14348	18332	10239	9878	11487	914	3050	3148	6733	2700	4560	12490	20142	69534
Zm00001d017553	chr5	199392112	199396013	+	Zm00001d017553	Zm00001d017553_T001	NA	NA	NA	NA	BZIP transcription factor	protein_coding	2.35452	0.808585	2.09978	0.40435	0.41913	1.19078	1.41643	0.612434	0.404774	1.58075	4.38153	5.8377	0.217328	0.041762	0.435785	2.66505	7.09847	2.50412	369	130	338	52	52	193	219	114	71	244	905	1139	40	6	87	526	1165	489
Zm00001d017619	chr5	201958424	201958630	+	Zm00001d017619	Zm00001d017619_T001	NA	NA	NA	NA	uncharacterized protein [Source:UniProtKB/TrEMBL;Acc:B6U6D2]	protein_coding	0.76174	2.754	0.298361	50.4023	85.4597	93.6846	22.6181	11.5081	11.4704	2.09477	0.007662	0.690586	9.04455	9.57436	21.8027	19.2439	36.122	53.3915	10	34	4	492	803	1150	266	163	152	25	1	11	127	93	330	289	450	792
Zm00001d017682	chr5	204120837	204122561	-	PLATZ-transcription factor 11	Zm00001d017682_T001	NA	NA	NA	NA	PLATZ transcription factor family protein	protein_coding	3.23707	2.13479	1.67941	92.9324	105.311	130.914	92.0922	16.3994	68.6328	0.600367	1.01372	0.577177	54.4746	35.2142	67.0428	1.888	5.4658	14.7776	252	170	134	5926	6466	10503	7059	1510	5918	46	104	56	4973	2232	6628	185	445	1432
Zm00001d017714	chr5	205056209	205061640	+	Zm00001d017714	Zm00001d017714_T001;Zm00001d017714_T002	GO:0015333(peptide:proton symporter activity);GO:0016020(membrane);GO:0016021(integral component of membrane);GO:0022857(transmembrane transporter activity);GO:0035672(oligopeptide transmembrane transport);GO:0035673(oligopeptide transmembrane transporter activity);GO:0042886(amide transport);GO:0055085(transmembrane transport);GO:1902600(proton transmembrane transport);GO:1904680(peptide transme…	NA	K14638	NA	Protein NRT1/ PTR FAMILY 8.3	protein_coding	1.23242	0.89238	1.6956	1.65208	1.408	0.640348	0.931271	1.67618	3.00822	0.198372	1.83742	0.74149	0.0480623	0.0001	0.242436	0.0447547	0.106219	0.0001	165	122	233	181	149	89	123	265	446	27	324	124	8	0	42	9	15	0
Zm00001d017778	chr5	206414473	206416485	-	bHLH-transcription factor 29	Zm00001d017778_T001	GO:0001228(DNA-binding transcription activator activity, RNA polymerase II-specific);GO:0005634(nucleus);GO:0006355(regulation of transcription, DNA-templated);GO:0045944(positive regulation of transcription by RNA polymerase II);GO:0046983(protein dimerization activity)	NA	NA	NA	Transcription factor bHLH63	protein_coding	2.38932	3.13853	2.17106	1.5849	2.78285	1.92127	0.372658	1.92735	1.39592	2.02096	3.91894	4.55508	31.0626	17.7895	11.6365	5.27339	3.51194	3.23126	192	257	179	105	177	159	30	183	125	160	414	455	2922	1162	1186	532	295	323
Zm00001d017783	chr5	206691760	206696301	+	Zm00001d017783	Zm00001d017783_T001;Zm00001d017783_T002;Zm00001d017783_T003;Zm00001d017783_T004;Zm00001d017783_T005;Zm00001d017783_T006	GO:0000166(nucleotide binding);GO:0005524(ATP binding);GO:0005739(mitochondrion);GO:0007005(mitochondrion organization);GO:0008270(zinc ion binding);GO:0016787(hydrolase activity);GO:0016787(hydrolase activity)	NA	K17681	NA	AAA-type ATPase family protein	protein_coding	1.5447	1.71094	1.2319	1.30144	2.46473	0.703262	3.70183	1.70836	3.91677	1.33752	1.71922	0.82533	4.17141	2.43921	3.61836	0.453707	0.672886	1.41668	220	247	180	152	276	104	517	287	615	187	321	146	693	282	651	81	100	250
Zm00001d017821	chr5	207742585	207746674	-	Zm00001d017821	Zm00001d017821_T001;Zm00001d017821_T002	GO:0002229(defense response to oomycetes);GO:0004672(protein kinase activity);GO:0004675(transmembrane receptor protein serine/threonine kinase activity);GO:0005524(ATP binding);GO:0005886(plasma membrane);GO:0006468(protein phosphorylation);GO:0006952(defense response);GO:0016020(membrane);GO:0016021(integral component of membrane);GO:0016301(kinase activity);GO:0016310(phosphorylation);GO:00302…	NA	NA	NA	Probable L-type lectin-domain containing receptor kinase S.5	protein_coding	4.8516	0.867051	1.17684	3.99528	3.96838	1.56906	8.28633	1.3573	15.7015	0.533246	2.25289	1.41584	6.70586	7.48233	9.00883	0.749504	0.771286	2.13748	759	139	189	513	490	255	1278	252	2723	83	465	276	1232	954	1792	148	127	418
Zm00001d017852	chr5	208841207	208841407	+	Zm00001d017852	Zm00001d017852_T001	GO:0016020(membrane);GO:0016021(integral component of membrane)	NA	NA	NA	Putative uncharacterized protein [Source:UniProtKB/TrEMBL;Acc:B6SJZ4]	protein_coding	14.2766	15.8153	10.3233	37.2272	21.525	64.0131	87.3051	28.0912	14.0424	16.2566	45.5751	37.7993	5.4615	2.40095	19.6809	16.9909	78.6441	413.703	165	187	123	353	197	763	995	385	180	185	694	544	75	23	290	248	951	5953
Zm00001d017861	chr5	209075772	209076365	+	Zm00001d017861	Zm00001d017861_T001	GO:0005515(protein binding);GO:0006457(protein folding);GO:0009506(plasmodesma);GO:0051087(chaperone binding)	NA	NA	NA	Protein binding protein	protein_coding	7.30842	6.6411	8.33697	6.2197	6.50812	6.83027	5.95307	6.70125	7.21017	7.92477	4.67415	5.69956	3.44332	1.14221	1.9348	0.347896	0.0001	0.088427	250	232	292	175	176	241	201	271	273	267	211	243	138	32	84	15	0	4
Zm00001d017885	chr5	209614260	209620254	+	C2C2-CO-like-transcription factor 5	Zm00001d017885_T001;Zm00001d017885_T002;Zm00001d017885_T003;Zm00001d017885_T004;Zm00001d017885_T005;Zm00001d017885_T006	GO:0005515(protein binding);GO:0005622(intracellular);GO:0005634(nucleus);GO:0008270(zinc ion binding);GO:0008270(zinc ion binding)	NA	NA	NA	Zinc finger protein CONSTANS-LIKE 9	protein_coding	16.5973	16.5367	19.2078	5.26913	9.44898	8.89649	6.06791	10.6847	5.90282	1.9714	5.33254	6.26821	13.6175	19.0648	23.3474	0.534259	0.242928	2.03934	3159	3212	3752	824	1423	1749	1140	2410	1248	370	1338	1486	3046	2959	5653	129	49	484
Zm00001d017954	chr5	210807462	210811487	+	Zm00001d017954	Zm00001d017954_T001;Zm00001d017954_T002	GO:0000166(nucleotide binding);GO:0006952(defense response);GO:0043531(ADP binding);GO:0043531(ADP binding)	NA	NA	NA	Disease resistance protein RPM1	protein_coding	0.303153	0.416111	0.179061	1.16128	2.79391	1.86489	1.50048	0.517229	1.74119	0.0001	0.220277	0.175081	0.611881	0.576788	0.913832	0.083103	0.102857	0.152294	67	93	41	209	485	423	325	135	424	0	64	48	158	103	255	23	24	42
Zm00001d017987	chr5	211412495	211416317	-	Zm00001d017987	Zm00001d017987_T001;Zm00001d017987_T002;Zm00001d017987_T003;Zm00001d017987_T004	GO:0005874(microtubule);GO:0008017(microtubule binding);GO:0008017(microtubule binding)	NA	NA	NA	Microtubule-associated protein TORTIFOLIA1	protein_coding	2.56425	3.97671	1.23508	1.565	4.39782	3.50994	3.02003	13.2878	2.10721	1.794	4.25616	2.11407	0.91933	0.992729	0.951735	0.232274	0.89547	0.704934	525	829	259	262	709	739	609	3211	478	361	1145	538	221	167	248	62	193	181
Zm00001d017994	chr5	211567137	211568207	+	Zm00001d017994	Zm00001d017994_T001	GO:0005515(protein binding)	NA	NA	NA	Transducin/WD40 repeat-like superfamily protein	protein_coding	6.87219	6.71537	2.88395	1.93284	1.78653	6.19486	9.87741	9.17937	8.67705	1.4482	4.37982	5.17157	0.254448	0.618076	0.892477	0.634792	0.745874	0.165566	423	422	183	98	87	394	600	669	593	88	355	397	19	31	70	50	49	13
Zm00001d018006	chr5	211895819	211898527	+	Zm00001d018006	Zm00001d018006_T001;Zm00001d018006_T002;Zm00001d018006_T003;Zm00001d018006_T004	GO:0016301(kinase activity);GO:0016310(phosphorylation);GO:0016310(phosphorylation)	NA	NA	NA	Serine/threonine-protein kinase WNK (With No Lysine)-related	protein_coding	2.93617	7.72188	3.827	4.336	13.6371	3.75735	6.50158	6.76859	9.86317	14.6281	5.63179	7.21172	2.99476	2.6033	2.99484	1.33439	1.35062	2.59535	380	1017	507	460	1391	501	828	1034	1413	1857	957	1160	455	276	492	218	184	418
Zm00001d018009	chr5	211938923	211947803	-	Zm00001d018009	Zm00001d018009_T001;Zm00001d018009_T002;Zm00001d018009_T004;Zm00001d018009_T005;Zm00001d018009_T006;Zm00001d018009_T007;Zm00001d018009_T008;Zm00001d018009_T009;Zm00001d018009_T010;Zm00001d018009_T011;Zm00001d018009_T014;Zm00001d018009_T015;Zm00001d018009_T016;Zm00001d018009_T017;Zm00001d018009_T018;Zm00001d018009_T020;Zm00001d018009_T026	GO:0000166(nucleotide binding);GO:0003774(motor activity);GO:0003777(microtubule motor activity);GO:0005524(ATP binding);GO:0005871(kinesin complex);GO:0005874(microtubule);GO:0007018(microtubule-based movement);GO:0007052(mitotic spindle organization);GO:0008017(microtubule binding);GO:0016787(hydrolase activity);GO:0016887(ATPase activity);GO:0016887(ATPase activity)	NA	NA	NA	P-loop containing nucleoside triphosphate hydrolases superfamily protein	protein_coding	0.617876	0.525527	0.569758	1.93311	3.39717	3.81761	2.18048	0.285552	1.15559	0.0248478	0.137866	0.112446	1.02275	0.523273	1.31089	0.129029	0.156881	0.244324	190	166	180	489	827	1212	663	104	395	8	56	44	370	133	514	51	51	94
Zm00001d018030	chr5	212391759	212393282	+	Zm00001d018030	Zm00001d018030_T001;Zm00001d018030_T002;Zm00001d018030_T003	GO:0009535(chloroplast thylakoid membrane);GO:0009773(photosynthetic electron transport in photosystem I);GO:0010598(NAD(P)H dehydrogenase complex (plastoquinone));GO:0016020(membrane);GO:0016021(integral component of membrane);GO:0016021(integral component of membrane)	NA	NA	NA	Photosynthetic NDH subunit of subcomplex B 4 chloroplastic	protein_coding	620.947	554.648	762.519	135.584	144.296	152.502	309.328	459.017	306.287	952.07	886.579	1073.96	377.303	346.779	702.755	944.293	777.457	710.218	40680	37095	51279	7291	7473	10319	19994	35631	22273	61430	76539	87665	29047	18531	58589	77931	53349	58009
Zm00001d018122	chr5	214720422	214721681	+	Zm00001d018122	Zm00001d018122_T001	GO:0006511(ubiquitin-dependent protein catabolic process);GO:0016020(membrane);GO:0016021(integral component of membrane);GO:0016567(protein ubiquitination);GO:0016874(ligase activity);GO:0061630(ubiquitin protein ligase activity)	NA	K10664	EC:2.3.2.27	E3 ubiquitin-protein ligase ATL6	protein_coding	1.05054	0.834472	1.09811	12.3255	8.8767	19.9592	3.30934	1.51386	10.4488	0.56365	1.47512	1.41173	6.47917	3.75981	7.66513	11.5353	20.32	33.7204	76	62	82	732	508	1492	237	130	840	41	141	128	551	222	706	1052	1540	3042
Zm00001d018161	chr5	215727084	215730071	-	Zm00001d018161	Zm00001d018161_T001;Zm00001d018161_T002	GO:0016491(oxidoreductase activity);GO:0020037(heme binding);GO:0051536(iron-sulfur cluster binding);GO:0055114(oxidation-reduction process);GO:0055114(oxidation-reduction process)	NA	NA	NA	Ferredoxin--nitrite reductase chloroplastic	protein_coding	29.4213	17.0912	24.5468	66.079	151.08	175.464	0.893861	4.08084	1.52643	24.1275	33.0234	39.8141	6.21087	3.97929	7.37118	56.1744	27.8419	69.4651	3868	2294	3312	7129	15694	23815	117	636	224	3124	5720	6520	961	428	1234	9301	3834	11384
Zm00001d018194	chr5	216143234	216145894	-	Zm00001d018194	Zm00001d018194_T001	GO:0005783(endoplasmic reticulum);GO:0005793(endoplasmic reticulum-Golgi intermediate compartment);GO:0005794(Golgi apparatus);GO:0006886(intracellular protein transport);GO:0006888(endoplasmic reticulum to Golgi vesicle-mediated transport);GO:0007030(Golgi organization);GO:0016020(membrane);GO:0016021(integral component of membrane);GO:0030134(COPII-coated ER to Golgi transport vesicle)	NA	NA	NA	Transmembrane emp24 domain-containing protein 10	protein_coding	1.79334	1.39639	0.4028	0.235163	1.11809	1.08838	1.66861	1.09372	1.3657	4.39215	7.18949	5.21176	12.8499	9.04611	12.5563	2.94923	4.46713	3.23218	136	108	32	15	67	85	125	98	115	327	716	491	1141	558	1207	281	354	305
Zm00001d018206	chr5	216589277	216592402	-	Zm00001d018206	Zm00001d018206_T001	GO:0005829(cytosol);GO:0006809(nitric oxide biosynthetic process);GO:0009703(nitrate reductase (NADH) activity);GO:0016491(oxidoreductase activity);GO:0030151(molybdenum ion binding);GO:0042128(nitrate assimilation);GO:0043546(molybdopterin cofactor binding);GO:0046872(metal ion binding);GO:0055114(oxidation-reduction process);GO:0071949(FAD binding)	NA	NA	NA	Nitrate reductase [NADH] 2	protein_coding	14.8382	16.1114	20.6033	3.475	1.33737	70.1299	8.77654	6.2043	2.05075	2.4378	21.7153	16.1678	0.728024	0.443366	0.114408	5.19045	5.71708	173.747	1701	1885	2424	327	122	8300	993	843	261	276	3280	2309	99	42	17	750	687	24826
Zm00001d018238	chr5	217193701	217195534	+	Zm00001d018238	Zm00001d018238_T001	GO:0005623(cell);GO:0006662(glycerol ether metabolic process);GO:0015035(protein disulfide oxidoreductase activity);GO:0045454(cell redox homeostasis)	NA	NA	NA	Thioredoxin-like 3-1 chloroplastic	protein_coding	159.174	139.039	194.538	1.70197	1.66516	1.41844	63.1222	87.6656	59.2591	138.133	223.254	232.528	25.4126	34.869	49.5008	6.84232	10.5684	3.08703	10931	9747	13713	96	91	101	4277	7133	4517	9343	20203	19896	2051	1953	4326	592	761	265
Zm00001d018257	chr5	217516473	217524451	+	Zm00001d018257	Zm00001d018257_T001;Zm00001d018257_T002;Zm00001d018257_T003;Zm00001d018257_T004;Zm00001d018257_T005;Zm00001d018257_T006;Zm00001d018257_T008;Zm00001d018257_T009	GO:0016020(membrane);GO:0016021(integral component of membrane);GO:0016021(integral component of membrane)	NA	NA	NA		protein_coding	0.20735	0.0930885	0.342245	0.219865	0.253977	0.234807	0.397058	0.162412	0.321838	2.46328	3.32122	3.11995	7.74885	5.26596	7.5332	3.80265	2.93253	2.68866	88	41	148	76	85	103	165	81	150	1014	1830	1625	3804	1794	4003	2002	1285	1403
Zm00001d018298	chr5	218096889	218097874	+	Zm00001d018298	Zm00001d018298_T001	GO:0000302(response to reactive oxygen species);GO:0006457(protein folding);GO:0009408(response to heat);GO:0009651(response to salt stress);GO:0042542(response to hydrogen peroxide);GO:0043621(protein self-association);GO:0051082(unfolded protein binding);GO:0051259(protein complex oligomerization)	04141(Protein processing in endoplasmic reticulum)	K13993	NA	17.4 kDa class III heat shock protein	protein_coding	0.312149	0.107877	0.461589	2.01682	9.02054	12.5826	3.82018	3.83912	3.08921	0.0001	0.882316	0.458003	3.36768	2.10184	2.31233	190.367	285.057	839.019	16	6	25	85	366	666	194	233	176	0	60	30	203	88	151	12282	15292	53574
Zm00001d018390	chr5	219924290	219925789	+	Zm00001d018390	Zm00001d018390_T001	GO:0006511(ubiquitin-dependent protein catabolic process);GO:0016567(protein ubiquitination);GO:0061630(ubiquitin protein ligase activity)	NA	NA	NA	RING/U-box superfamily protein	protein_coding	9.74493	5.11824	8.68205	1.35023	1.34862	1.49883	1.19314	1.40007	1.87315	18.584	20.6652	21.8379	5.16057	4.6368	10.9044	84.5162	39.9503	22.9925	766	411	700	88	84	122	93	131	164	1438	2139	2138	477	298	1090	8363	3287	2252
Zm00001d018475	chr5	221498364	221507258	+	Zm00001d018475	Zm00001d018475_T001	GO:0000226(microtubule cytoskeleton organization);GO:0005881(cytoplasmic microtubule);GO:0008017(microtubule binding)	NA	NA	NA	CLIP-associated protein	protein_coding	2.16631	2.10443	2.20709	0.472514	0.707069	1.08461	1.3407	2.51709	1.31622	1.19219	0.863093	0.92949	0.338535	0.313608	0.248485	0.190861	0.153372	0.187539	539	535	564	97	139	279	329	742	364	293	283	289	99	64	79	60	40	59
Zm00001d018477	chr5	221507910	221515299	+	Zm00001d018477	Zm00001d018477_T001;Zm00001d018477_T002;Zm00001d018477_T003;Zm00001d018477_T004;Zm00001d018477_T005;Zm00001d018477_T006;Zm00001d018477_T007;Zm00001d018477_T008;Zm00001d018477_T009;Zm00001d018477_T010;Zm00001d018477_T011	GO:0016740(transferase activity);GO:0016740(transferase activity)	NA	NA	NA	Phosphatidylinositol N-acetyglucosaminlytransferase subunit P-related	protein_coding	1.28026	2.02543	1.47022	0.53637	0.895366	0.764388	1.0418	1.56759	0.819826	0.675621	0.908275	0.723217	0.359792	0.211636	0.437773	0.159455	0.230379	0.2102	510	824	602	178	282	316	409	741	363	266	477	359	169	70	222	80	96	105
Zm00001d018529	chr5	222527039	222528726	+	Zm00001d018529	Zm00001d018529_T001;Zm00001d018529_T002	GO:0005515(protein binding);GO:0005515(protein binding)	NA	NA	NA		protein_coding	64.0891	36.9389	48.824	217.684	271.883	351.13	122.608	69.2543	124.907	41.2385	41.7105	53.011	150.625	80.1128	132.502	166.651	142.749	671.347	5639	3318	4409	15716	18902	31897	10641	7219	12196	3574	4835	5811	15570	5749	14833	18467	13152	73625
Zm00001d018613	chr7	871207	877190	-	Zm00001d018613	Zm00001d018613_T002;Zm00001d018613_T003;Zm00001d018613_T004;Zm00001d018613_T005;Zm00001d018613_T006;Zm00001d018613_T007;Zm00001d018613_T009;Zm00001d018613_T010;Zm00001d018613_T011;Zm00001d018613_T012;Zm00001d018613_T013;Zm00001d018613_T014;Zm00001d018613_T015;Zm00001d018613_T016;Zm00001d018613_T017;Zm00001d018613_T019;Zm00001d018613_T020	GO:0003676(nucleic acid binding);GO:0003723(RNA binding);GO:0005634(nucleus);GO:0006396(RNA processing);GO:0016020(membrane);GO:0016021(integral component of membrane);GO:1990904(ribonucleoprotein complex);GO:1990904(ribonucleoprotein complex)	NA	NA	NA	La-related protein 6C	protein_coding	4.30804	3.35586	4.09015	8.82407	12.4973	7.85962	6.81884	4.59496	5.80504	5.63896	8.42922	8.28538	44.3156	24.2747	25.9842	11.438	9.93095	18.2855	1966	1568	1915	3303	4501	3699	3067	2482	2938	2532	5061	4706	23709	9017	15058	6565	4742	10383
Zm00001d018617	chr7	1105512	1106576	+	gibberellin 2-oxidase12	Zm00001d018617_T001	GO:0016491(oxidoreductase activity);GO:0046872(metal ion binding);GO:0051213(dioxygenase activity);GO:0055114(oxidation-reduction process)	NA	NA	NA	gibberellin 2-oxidase12	protein_coding	3.60744	0.733292	0.322669	1.54654	1.71107	0.0001	0.519163	0.474814	1.70653	0.91305	2.15939	1.9518	0.048616	0.150244	0.333951	1.93016	4.56583	1.44567	221	46	21	78	83	0	32	35	116	55	174	149	4	8	26	149	293	111
Zm00001d018627	chr7	1335710	1339124	-	monosaccharide transporter1	Zm00001d018627_T001	GO:0005351(carbohydrate:proton symporter activity);GO:0005355(glucose transmembrane transporter activity);GO:0005887(integral component of plasma membrane);GO:0008643(carbohydrate transport);GO:0008645(hexose transmembrane transport);GO:0016020(membrane);GO:0016021(integral component of membrane);GO:0022857(transmembrane transporter activity);GO:0046323(glucose import);GO:0055085(transmembrane tr…	NA	NA	NA	monosaccharide transporter1	protein_coding	0.866783	0.133048	0.166076	8.19624	5.24325	4.92786	12.9405	1.9845	13.5864	3.71273	9.56353	10.7594	25.2963	21.8972	75.1808	31.5724	21.2927	25.3205	95	15	19	735	453	557	1395	257	1648	400	1377	1465	3248	1952	10454	4346	2437	3450
Zm00001d018629	chr7	1372027	1372659	-	Zm00001d018629	Zm00001d018629_T001	GO:0005576(extracellular region);GO:0048046(apoplast)	NA	NA	NA	Dirigent-like protein pDIR3	protein_coding	55.0045	43.1348	35.2739	39.3272	37.9105	42.0284	41.498	39.1066	32.7146	53.5448	84.4797	86.3527	15.1366	8.11682	19.7773	94.6947	119.539	115.718	2000	1601	1316	1174	1089	1578	1488	1684	1320	1917	4046	3911	647	241	915	4336	4551	5244
Zm00001d018696	chr7	2698898	2701382	-	Zm00001d018696	Zm00001d018696_T001	GO:0004322(ferroxidase activity);GO:0005507(copper ion binding);GO:0005886(plasma membrane);GO:0006826(iron ion transport);GO:0009505(plant-type cell wall);GO:0009506(plasmodesma);GO:0016491(oxidoreductase activity);GO:0016722(oxidoreductase activity, oxidizing metal ions);GO:0055072(iron ion homeostasis);GO:0055114(oxidation-reduction process)	NA	NA	NA	SKU5 similar 17	protein_coding	0.127524	0.383397	0.235443	0.194928	0.41241	0.15268	0.99378	0.50099	0.551924	6.57092	7.56674	10.9328	1.82257	1.10819	1.94223	1.27835	5.48903	5.24097	17	51	32	21	43	21	128	78	80	841	1296	1770	279	118	322	210	748	850
Zm00001d018854	chr7	7395278	7396333	-	Zm00001d018854	Zm00001d018854_T001	GO:0009056(catabolic process);GO:0016787(hydrolase activity)	NA	NA	NA	Probable carboxylesterase 15	protein_coding	0.061355	0.0001	0.0001	0.433538	2.57762	0.378624	0.0001	0.0001	0.149383	0.062967	0.0001	0.033534	3.37539	4.70155	4.17532	1.9735	1.27779	1.00627	4	0	0	22	124	24	0	0	11	4	0	3	241	233	323	151	82	77
Zm00001d018965	chr7	10857482	10858405	-	Zm00001d018965	Zm00001d018965_T001	GO:0004568(chitinase activity);GO:0005576(extracellular region);GO:0005975(carbohydrate metabolic process);GO:0008152(metabolic process);GO:0016787(hydrolase activity);GO:0016798(hydrolase activity, acting on glycosyl bonds);GO:0045493(xylan catabolic process)	NA	NA	NA	Xylanase inhibitor protein 1	protein_coding	0.141747	0.132946	0.0001	0.085131	3.43302	0.089074	0.071837	0.0001	0.0001	3.55956	6.80778	6.86025	16.0405	8.55128	18.2737	5.34399	7.55431	77.5017	8	8	0	4	144	5	4	0	0	186	476	454	1001	371	1234	358	420	5127
Zm00001d018983	chr7	11819745	11822731	-	Zm00001d018983	Zm00001d018983_T001	GO:0004672(protein kinase activity);GO:0004674(protein serine/threonine kinase activity);GO:0005524(ATP binding);GO:0005737(cytoplasm);GO:0006468(protein phosphorylation);GO:0016301(kinase activity);GO:0016310(phosphorylation);GO:0035556(intracellular signal transduction)	NA	NA	NA	Serine/threonine-protein kinase WNK2	protein_coding	6.39644	8.78027	9.86497	21.2176	28.1425	22.8151	48.3714	10.4559	48.0613	20.4482	24.9706	32.0272	57.877	34.585	155.249	432.6	315.34	242.714	909	1274	1439	2475	3161	3349	6782	1761	7581	2862	4676	5671	9665	4009	28076	77441	46936	43002
Zm00001d019002	chr7	12662001	12662237	+	Zm00001d019002	Zm00001d019002_T001	NA	NA	NA	NA		protein_coding	3.6225	0.795717	2.07234	30.043	25.2092	85.0727	194.737	29.6744	72.8228	27.9615	28.7561	25.1719	180.038	48.7185	106.992	415.651	403.975	650.2	50	12	29	336	272	1196	2615	479	1100	375	516	427	2879	541	1853	7126	5758	11031
Zm00001d019045	chr7	14093201	14093758	+	Zm00001d019045	Zm00001d019045_T001	GO:0000786(nucleosome);GO:0000790(nuclear chromatin);GO:0003677(DNA binding);GO:0005634(nucleus);GO:0005694(chromosome);GO:0006325(chromatin organization);GO:0006342(chromatin silencing);GO:0046982(protein heterodimerization activity)	NA	K11251	NA	Histone H2A	protein_coding	35.2602	23.2234	51.9156	5.58703	7.26921	10.6896	16.0371	17.054	15.6465	103.14	151.974	268.887	17.0227	24.6579	34.7377	62.2856	95.195	227.04	1130	760	1708	147	185	354	507	648	557	3255	6417	10734	641	645	1417	2514	3195	9069
Zm00001d019057	chr7	14373489	14374835	+	asg34a(msd)	Zm00001d019057_T001	NA	NA	NA	NA		protein_coding	15.5476	12.7656	21.98	0.638822	1.83478	1.21323	1.27376	2.77806	1.15541	114.608	161.816	152.553	15.5289	9.1352	19.0949	115.485	88.6569	24.3373	1125	943	1633	38	105	91	91	239	93	8166	15427	13752	1321	540	1758	10525	6718	2196
Zm00001d019078	chr7	15495962	15497950	-	Zm00001d019078	Zm00001d019078_T001;Zm00001d019078_T002	GO:0000166(nucleotide binding);GO:0005524(ATP binding);GO:0016020(membrane);GO:0016021(integral component of membrane);GO:0016021(integral component of membrane)	NA	NA	NA	AAA-ATPase ASD mitochondrial	protein_coding	0.322412	2.88238	0.43408	1.02681	17.8295	6.83674	7.82924	0.833201	0.215356	4.50263	2.68459	1.37057	44.3315	31.9406	28.5934	8.19704	4.95716	109.559	36	324	49	93	1545	775	847	109	27	486	388	188	5708	2855	3988	1132	570	14965
Zm00001d019116	chr7	17758679	17759647	+	AP2-EREBP-transcription factor 82	Zm00001d019116_T001	GO:0003677(DNA binding);GO:0003700(DNA-binding transcription factor activity);GO:0005634(nucleus);GO:0006351(transcription, DNA-templated);GO:0006355(regulation of transcription, DNA-templated)	NA	K09286	NA	Ethylene-responsive transcription factor RAP2-11	protein_coding	0.621182	0.810635	1.03332	4.00279	6.96059	4.74371	21.0519	4.1453	25.9079	2.29317	2.70868	1.70894	0.256555	0.03996	0.209224	0.267099	0.191968	1.8211	35	47	60	183	307	273	1156	274	1600	126	199	119	17	2	15	19	12	127
Zm00001d019145	chr7	19093571	19096947	-	Zm00001d019145	Zm00001d019145_T001	GO:0004672(protein kinase activity);GO:0005515(protein binding);GO:0005524(ATP binding);GO:0005886(plasma membrane);GO:0006468(protein phosphorylation);GO:0009506(plasmodesma);GO:0016020(membrane);GO:0016021(integral component of membrane);GO:0016301(kinase activity);GO:0016310(phosphorylation);GO:0046777(protein autophosphorylation)	NA	NA	NA	Leucine-rich repeat receptor-like tyrosine-protein kinase PXC3	protein_coding	2.14712	2.88511	2.36912	0.467467	1.53839	0.421656	0.835407	2.82851	1.64036	2.63877	5.10329	6.49206	2.69119	1.13285	3.01085	12.1197	8.52003	4.28198	404	554	458	73	229	82	155	630	343	489	1265	1521	595	174	721	2870	1678	1004
Zm00001d019149	chr7	19277318	19283240	-	cellulose synthase4	Zm00001d019149_T001;Zm00001d019149_T002;Zm00001d019149_T003;Zm00001d019149_T004;Zm00001d019149_T005;Zm00001d019149_T006;Zm00001d019149_T007;Zm00001d019149_T008;Zm00001d019149_T009	GO:0005794(Golgi apparatus);GO:0005802(trans-Golgi network);GO:0005886(plasma membrane);GO:0009833(plant-type primary cell wall biogenesis);GO:0016020(membrane);GO:0016021(integral component of membrane);GO:0016740(transferase activity);GO:0016757(transferase activity, transferring glycosyl groups);GO:0016759(cellulose synthase activity);GO:0016760(cellulose synthase (UDP-forming) activity);GO:00…	NA	K10999	EC:2.4.1.12	cellulose synthase4	protein_coding	7.75898	10.4328	5.99381	5.4087	7.24922	7.93003	3.0123	4.15285	2.93262	6.81332	40.1796	32.2095	1.93569	1.1112	3.57182	4.63936	18.4281	15.9766	1872	2569	1484	1071	1384	1975	717	1188	786	1620	12769	9680	549	219	1097	1410	4657	4804
Zm00001d019387	chr7	31263986	31271165	+	Zm00001d019387	Zm00001d019387_T001	GO:0004601(peroxidase activity);GO:0006979(response to oxidative stress);GO:0009505(plant-type cell wall);GO:0009506(plasmodesma);GO:0020037(heme binding);GO:0046872(metal ion binding);GO:0055114(oxidation-reduction process);GO:0098869(cellular oxidant detoxification)	NA	NA	NA	Peroxidase [Source:UniProtKB/TrEMBL;Acc:A0A1D6HX87]	protein_coding	0.015887	0.196911	0.0001	0.13571	0.489134	0.22662	0.048081	0.0001	0.0001	0.55973	0.578186	0.539598	1.59028	1.27023	1.32603	0.248565	0.373717	0.69715	4	48	0	27	92	56	12	0	0	131	181	160	443	246	400	75	93	206
Zm00001d019398	chr7	31999185	32006505	+	Zm00001d019398	Zm00001d019398_T001	GO:0000166(nucleotide binding);GO:0005524(ATP binding);GO:0005886(plasma membrane);GO:0016020(membrane);GO:0016021(integral component of membrane);GO:0016887(ATPase activity);GO:0042626(ATPase-coupled transmembrane transporter activity);GO:0055085(transmembrane transport)	NA	NA	NA	ABC transporter G family member 11	protein_coding	1.93162	2.2578	1.02123	1.43346	1.42342	1.46352	0.546813	9.61646	0.753698	0.814021	0.950531	0.338593	0.02321	0.0001	0.085731	0.475026	0.309253	0.501767	267	318	145	163	156	209	75	1571	116	111	173	59	4	0	16	83	45	87
Zm00001d019473	chr7	35502929	35504870	+	Zm00001d019473	Zm00001d019473_T001	GO:0002181(cytoplasmic translation);GO:0003723(RNA binding);GO:0003735(structural constituent of ribosome);GO:0005840(ribosome);GO:0006412(translation);GO:0015934(large ribosomal subunit);GO:0022625(cytosolic large ribosomal subunit)	03010(Ribosome)	K02938	NA	60S ribosomal protein L8-3	protein_coding	25.8114	36.2733	16.9089	7.12642	10.1711	13.2102	21.8443	28.5478	16.5929	11.4532	15.4102	7.01503	3.46068	2.61585	6.64957	2.37941	6.10219	13.4047	1777	2550	1195	403	554	940	1484	2329	1268	777	1398	602	280	147	583	207	440	1151
Zm00001d019510	chr7	38447055	38450581	-	Zm00001d019510	Zm00001d019510_T001	GO:0016020(membrane);GO:0016021(integral component of membrane)	NA	NA	NA	Folate/biopterin transporter family protein	protein_coding	1.05238	4.20288	2.63961	1.08026	1.70113	3.12073	1.40674	8.45032	1.07134	2.26692	1.61111	1.60653	0.430024	0.246538	0.657459	15.6178	23.0829	23.3619	119	482	304	100	151	362	156	1124	134	251	239	225	57	23	94	2208	2713	3268
Zm00001d019527	chr7	40265313	40267858	-	Yucca5	Zm00001d019527_T001;Zm00001d019527_T002;Zm00001d019527_T003;Zm00001d019527_T004;Zm00001d019527_T005	GO:0004497(monooxygenase activity);GO:0004499(N,N-dimethylaniline monooxygenase activity);GO:0016491(oxidoreductase activity);GO:0050660(flavin adenine dinucleotide binding);GO:0050661(NADP binding);GO:0055114(oxidation-reduction process);GO:0055114(oxidation-reduction process)	00380(Tryptophan metabolism);00380(Tryptophan metabolism)	K11816	EC:1.14.13.168	Yucca5	protein_coding	0.0001	0.0881887	0.0847698	0.844855	1.86139	0.309225	0.83021	0.236135	1.98323	0.618433	0.504581	0.302698	3.02126	3.85027	10.5565	2.17787	3.41208	2.5209	0	14	13	102	218	47	121	41	325	91	99	56	520	461	1966	402	524	460
Zm00001d019613	chr7	46353759	46366865	-	Zm00001d019613	Zm00001d019613_T001	GO:0008168(methyltransferase activity);GO:0008171(O-methyltransferase activity);GO:0008757(S-adenosylmethionine-dependent methyltransferase activity);GO:0016740(transferase activity);GO:0019438(aromatic compound biosynthetic process);GO:0032259(methylation)	NA	NA	NA	Probable O-methyltransferase 2	protein_coding	25.4041	11.9921	29.6293	2.96527	3.8017	2.44105	14.7486	16.0343	22.3169	0.938409	0.964644	1.0473	0.147844	0.041994	0.041415	1.48778	0.607054	0.065732	2740	1321	3280	263	324	272	1569	2049	2672	100	138	141	19	4	6	203	69	9
Zm00001d019793	chr7	62169440	62170161	+	SBP-transcription factor 4	Zm00001d019793_T001	NA	NA	NA	NA		protein_coding	0.0001	0.0001	0.0001	0.19824	0.258847	0.857021	0.152845	0.0001	0.120831	1.37646	4.1045	1.68587	17.522	10.5377	16.0507	2.88442	1.68936	5.87955	0	0	0	5	6	24	5	0	4	36	144	56	547	228	542	97	47	195
Zm00001d019794	chr7	62171139	62171417	-	Zm00001d019794	Zm00001d019794_T001	NA	NA	NA	NA		protein_coding	1.13948	0.335112	0.927621	0.977148	1.82893	1.45577	0.968351	0.541983	0.995897	11.6501	8.69382	7.91068	33.0629	20.5086	26.6817	17.3409	16.0754	34.6401	19	6	16	13	24	25	16	11	18	184	184	158	623	268	544	350	270	692
Zm00001d019936	chr7	77664397	77665592	+	Zm00001d019936	Zm00001d019936_T001	NA	NA	NA	NA	Heavy metal-associated domain containing protein [Source:UniProtKB/TrEMBL;Acc:B4FT05]	protein_coding	1.09483	0.24388	0.663742	3.95198	2.2694	5.44493	12.5166	0.716212	2.55959	2.711	17.3479	12.4595	1.40251	0.15333	1.94575	26.0699	84.3995	333.456	63	15	40	187	103	323	709	49	163	154	1312	891	95	8	143	1884	5071	23847
Zm00001d020008	chr7	85218743	85225209	-	Zm00001d020008	Zm00001d020008_T001;Zm00001d020008_T002	GO:0000162(tryptophan biosynthetic process);GO:0003824(catalytic activity);GO:0004425(indole-3-glycerol-phosphate synthase activity);GO:0004640(phosphoribosylanthranilate isomerase activity);GO:0006568(tryptophan metabolic process);GO:0006568(tryptophan metabolic process)	00400(Phenylalanine, tyrosine and tryptophan biosynthesis);00400(Phenylalanine, tyrosine and tryptophan biosynthesis)	K01609	EC:4.1.1.48	Indole-3-glycerol phosphate synthase chloroplastic	protein_coding	0.472	3.4878	0.0001	0.0001	0.832287	0.0001	4.97273	0.276735	6.4175	6.13549	59.2121	81.2727	2.27956	1.82983	5.79956	5.80054	24.7881	3.1227	41	303	0	0	56	0	417	28	604	513	6613	8583	228	128	627	620	2201	331
Zm00001d020071	chr7	90397384	90401326	+	Zm00001d020071	Zm00001d020071_T001	GO:0005351(carbohydrate:proton symporter activity);GO:0005355(glucose transmembrane transporter activity);GO:0005887(integral component of plasma membrane);GO:0008643(carbohydrate transport);GO:0008645(hexose transmembrane transport);GO:0016020(membrane);GO:0016021(integral component of membrane);GO:0022857(transmembrane transporter activity);GO:0046323(glucose import);GO:0055085(transmembrane tr…	NA	NA	NA	Sugar transport protein 14	protein_coding	3.00472	1.5391	3.01398	1.53463	2.89953	2.97616	8.35139	4.06902	6.59974	0.0001	0.0001	0.0001	0.890275	0.0001	1.00924	0.132364	0.309554	0.186816	291	152	299	122	222	297	796	466	708	0	0	0	101	0	124	17	32	23
Zm00001d020178	chr7	97689997	97700355	-	Zm00001d020178	Zm00001d020178_T001;Zm00001d020178_T002;Zm00001d020178_T003;Zm00001d020178_T004;Zm00001d020178_T005;Zm00001d020178_T006;Zm00001d020178_T007	NA	NA	NA	NA	Retinol dehydrogenase 13	protein_coding	3.1434	2.66811	2.37795	3.86122	5.34323	6.73938	3.6453	4.74838	3.8389	1.57123	2.25451	1.76551	10.8318	11.822	9.51416	0.10613	0.150471	1.26225	813	704	632	819	1092	1798	930	1453	1101	400	769	569	3289	2491	3128	36	41	407
Zm00001d020264	chr7	102995536	102997073	+	Zm00001d020264	Zm00001d020264_T001	NA	NA	NA	NA		protein_coding	55.3977	29.4259	47.3529	10.83	17.5421	8.02784	114.904	31.6536	107.022	32.808	95.9799	75.6232	26.9223	22.0481	51.629	178.439	170.132	167.678	4593	2491	4030	737	1150	688	9399	3110	9849	2679	10487	7813	2623	1491	5448	18637	14775	17333
Zm00001d020297	chr7	104760610	104770103	-	Zm00001d020297	Zm00001d020297_T001;Zm00001d020297_T002;Zm00001d020297_T003;Zm00001d020297_T004;Zm00001d020297_T005	GO:0004672(protein kinase activity);GO:0004674(protein serine/threonine kinase activity);GO:0005524(ATP binding);GO:0005737(cytoplasm);GO:0006468(protein phosphorylation);GO:0016301(kinase activity);GO:0016310(phosphorylation);GO:0016310(phosphorylation)	NA	K08856	EC:2.7.11.1	serine/threonine protein kinase 3	protein_coding	7.93408	6.69867	6.52359	22.8001	30.1771	28.6378	18.6973	9.3473	14.7277	2.97609	7.30762	6.0742	7.91161	12.0497	19.4662	1.6964	2.85277	6.73859	719	620	607	1695	2159	2676	1670	1005	1481	267	872	687	843	891	2242	195	272	763
Zm00001d020412	chr7	112203071	112204545	-	Zm00001d020412	Zm00001d020412_T001	GO:0000786(nucleosome);GO:0003677(DNA binding);GO:0003690(double-stranded DNA binding);GO:0005634(nucleus);GO:0005730(nucleolus);GO:0006334(nucleosome assembly);GO:0006355(regulation of transcription, DNA-templated);GO:0016584(nucleosome positioning);GO:0030261(chromosome condensation);GO:0031492(nucleosomal DNA binding);GO:0031936(negative regulation of chromatin silencing);GO:0042025(host cell …	NA	NA	NA	HMG-Y-related protein A	protein_coding	0.167914	0.084241	0.0001	0.185404	0.184213	0.274593	0.061051	1.01096	0.141174	3.03437	3.98641	3.027	1.61513	1.10657	2.07728	1.14491	2.23562	2.66578	13	7	0	12	12	22	5	93	13	231	406	291	147	70	204	112	181	257
Zm00001d020448	chr7	114984579	114986921	-	Zm00001d020448	Zm00001d020448_T001	GO:0005515(protein binding);GO:0005739(mitochondrion);GO:0009451(RNA modification);GO:0009507(chloroplast);GO:0043231(intracellular membrane-bounded organelle);GO:0080156(mitochondrial mRNA modification)	NA	NA	NA	Pentatricopeptide repeat-containing protein chloroplastic	protein_coding	1.79694	2.94546	1.98817	0.415552	0.829424	1.14913	1.05524	1.54959	1.16537	1.43879	1.13468	0.46288	0.305998	0.271347	0.06589	0.0001	0.021102	0.216233	242	405	275	46	89	160	141	247	175	191	202	78	49	30	12	0	3	37
Zm00001d020500	chr7	119411001	119414845	+	Zm00001d020500	Zm00001d020500_T001;Zm00001d020500_T002	NA	NA	NA	NA		protein_coding	12.7148	11.3868	25.6545	66.0203	71.1438	80.4207	93.3028	20.9536	91.3828	1.47593	2.30773	2.90949	49.5737	25.6263	27.4091	24.2699	3.93186	6.00999	1741	1592	3605	7418	7697	11369	12601	3399	13885	200	417	498	7975	2862	4776	4185	564	1027
Zm00001d020534	chr7	121250330	121258808	-	Zm00001d020534	Zm00001d020534_T001	GO:0003677(DNA binding);GO:0005634(nucleus);GO:0042025(host cell nucleus);GO:0046872(metal ion binding)	NA	NA	NA	Squamosa promoter-binding-like protein 18	protein_coding	0.0001	0.0001	0.0001	0.0001	0.0001	0.0001	0.0001	0.0001	0.0001	1.79681	2.12258	1.86504	7.22924	3.08305	6.14103	2.26588	1.39376	1.73483	0	0	0	0	0	0	0	0	0	74	116	96	351	104	323	118	61	90
Zm00001d020555	chr7	122131912	122133826	-	Zm00001d020555	Zm00001d020555_T001	GO:0005886(plasma membrane);GO:0016020(membrane);GO:0016021(integral component of membrane);GO:0022857(transmembrane transporter activity);GO:0055085(transmembrane transport)	NA	NA	NA	WAT1-related protein	protein_coding	5.19024	3.48461	9.27192	4.49283	2.49246	4.27528	30.8873	7.18087	22.4457	7.28082	4.84874	5.91705	1.47602	1.10699	1.99977	3.5151	1.97571	3.19184	427	293	782	303	162	363	2504	700	2048	590	525	606	143	75	210	364	171	327
Zm00001d020703	chr7	129181703	129184420	-	Zm00001d020703	Zm00001d020703_T001	GO:0000166(nucleotide binding);GO:0004672(protein kinase activity);GO:0004674(protein serine/threonine kinase activity);GO:0005524(ATP binding);GO:0005886(plasma membrane);GO:0006468(protein phosphorylation);GO:0016020(membrane);GO:0016021(integral component of membrane);GO:0016301(kinase activity);GO:0016310(phosphorylation);GO:0016740(transferase activity);GO:0030246(carbohydrate binding)	NA	NA	NA	G-type lectin S-receptor-like serine/threonine-protein kinase	protein_coding	0.153364	0.164378	0.093055	5.94126	5.36761	10.6231	4.74147	1.18876	5.76096	0.02403	0.083899	0.172389	2.45014	0.98969	2.02503	0.16515	0.135654	0.73799	24	27	15	761	663	1712	731	220	998	4	18	34	450	126	403	33	23	144
Zm00001d020707	chr7	129503427	129504287	-	Zm00001d020707	Zm00001d020707_T001	GO:0009056(catabolic process);GO:0016787(hydrolase activity)	NA	NA	NA	Probable carboxylesterase 2	protein_coding	4.64152	2.43839	2.82458	1.84757	3.82549	3.05866	7.6388	5.47135	9.07304	16.818	19.5286	23.2419	8.02403	5.37352	12.231	19.1767	11.8422	21.1679	230	124	144	75	150	157	373	321	498	819	1273	1432	467	217	770	1195	614	1305
Zm00001d020717	chr7	129916943	129919846	-	abscisic acid 8'-hydroxylase4	Zm00001d020717_T001	GO:0004497(monooxygenase activity);GO:0005506(iron ion binding);GO:0007275(multicellular organism development);GO:0010268(brassinosteroid homeostasis);GO:0010295((+)-abscisic acid 8'-hydroxylase activity);GO:0016125(sterol metabolic process);GO:0016132(brassinosteroid biosynthetic process);GO:0016491(oxidoreductase activity);GO:0016705(oxidoreductase activity, acting on paired donors, with incorp…	00906(Carotenoid biosynthesis)	K09843	EC:1.14.14.137	abscisic acid 8'-hydroxylase4	protein_coding	62.3134	52.9915	83.4789	12.663	15.2777	81.6507	26.3932	46.7809	28.8367	27.2981	21.1409	17.7855	7.25502	2.28168	12.7223	168.47	77.7055	44.3465	6809	5911	9363	1136	1320	9213	2846	6057	3498	2938	3044	2422	932	204	1769	23189	8893	6042
Zm00001d020738	chr7	130768508	130769509	+	Zm00001d020738	Zm00001d020738_T001	GO:0009056(catabolic process);GO:0016787(hydrolase activity)	NA	NA	NA	Gibberellin receptor GID1L2	protein_coding	38.4755	27.9421	35.2326	9.69407	15.0327	18.0288	55.0048	38.3825	55.9868	18.6222	12.8627	15.9098	4.23732	2.50332	3.59847	4.71697	2.33551	4.51026	2214	1642	2081	458	684	1072	3123	2617	3576	1056	976	1141	287	118	264	342	141	324
Zm00001d020793	chr7	132928791	132929628	+	Zm00001d020793	Zm00001d020793_T001	GO:0009055(electron transfer activity);GO:0022900(electron transport chain);GO:0046658(anchored component of plasma membrane)	NA	NA	NA	Cupredoxin superfamily protein	protein_coding	3.42995	1.03354	2.51942	2.30947	1.49463	0.736562	1.7927	0.980173	0.901584	0.923542	3.88487	2.32327	0.0001	0.0001	0.767385	13.8178	18.9232	23.9482	146	45	110	81	50	33	75	50	43	39	217	123	0	0	42	737	839	1264
Zm00001d020826	chr7	133997692	134000698	+	bHLH-transcription factor 86	Zm00001d020826_T001	GO:0003700(DNA-binding transcription factor activity);GO:0005634(nucleus);GO:0006355(regulation of transcription, DNA-templated);GO:0043565(sequence-specific DNA binding);GO:0046983(protein dimerization activity)	NA	NA	NA	Transcription factor bHLH76	protein_coding	1.3599	1.33947	0.880031	1.55374	1.43972	1.80312	1.42756	2.32483	2.5675	1.44089	1.36392	0.72121	0.50584	0.12631	0.371491	0.262288	0.197424	0.195031	173	174	115	162	145	237	179	350	362	180	228	114	76	14	60	42	27	31
Zm00001d020867	chr7	135064149	135071720	+	Zm00001d020867	Zm00001d020867_T001	GO:0004252(serine-type endopeptidase activity);GO:0006508(proteolysis);GO:0008233(peptidase activity)	NA	NA	NA	Subtilisin-like protease SBT5.3	protein_coding	10.822	8.08896	7.43905	8.16392	15.4368	13.8611	6.40422	8.36211	13.6822	6.28717	5.13533	6.16817	2.15788	0.880192	1.17017	0.896939	1.26856	0.111886	1559	1190	1100	965	1757	2062	910	1427	2187	892	975	1107	366	104	215	163	192	21
Zm00001d020900	chr7	135891863	135894019	-	Zm00001d020900	Zm00001d020900_T001;Zm00001d020900_T002;Zm00001d020900_T003	GO:0034414(tRNA 3'-trailer cleavage, endonucleolytic);GO:0042781(3'-tRNA processing endoribonuclease activity);GO:0042781(3'-tRNA processing endoribonuclease activity)	NA	NA	NA	Ribonuclease Z chloroplastic	protein_coding	3.10878	4.15172	0.904458	0.143708	0.050278	0.0769595	2.88523	2.05704	3.83875	2.70171	5.19977	1.32779	1.59271	0.567465	1.83801	0.0285244	0.0001	0.593737	296	402	89	12	4	8	270	232	405	253	649	157	178	44	222	4	0	71
Zm00001d020923	chr7	136683805	136689077	+	Zm00001d020923	Zm00001d020923_T001	GO:0003676(nucleic acid binding);GO:0005634(nucleus);GO:0010468(regulation of gene expression);GO:0048856(anatomical structure development)	NA	NA	NA	Zinc finger protein	protein_coding	1.24248	1.03947	0.454534	1.67711	2.46278	1.87378	1.05476	0.709372	1.63569	0.38086	4.01086	2.96718	1.36224	0.220718	0.764877	2.87626	5.85543	1.55546	125	107	47	138	195	194	105	85	182	38	530	371	161	19	98	363	615	195
Zm00001d020954	chr7	137626105	137626968	+	C3H-transcription factor 340	Zm00001d020954_T001	GO:0000398(mRNA splicing, via spliceosome);GO:0003676(nucleic acid binding);GO:0003723(RNA binding);GO:0005681(spliceosomal complex);GO:0030628(pre-mRNA 3'-splice site binding);GO:0046872(metal ion binding);GO:0089701(U2AF)	03040(Spliceosome)	K12836	NA	Splicing factor U2af small subunit A	protein_coding	10.7003	6.49543	10.3762	26.662	47.369	82.5643	102.944	44.3293	77.6602	6.59994	10.2374	9.30937	24.7746	17.6941	20.7166	272.586	218.915	258.758	531	329	529	1086	1858	4230	5039	2606	4277	323	670	576	1445	716	1308	17035	11375	16004
Zm00001d021208	chr7	146038525	146039307	-	AP2-EREBP-transcription factor 115	Zm00001d021208_T001	GO:0003677(DNA binding);GO:0003700(DNA-binding transcription factor activity);GO:0005634(nucleus);GO:0006351(transcription, DNA-templated);GO:0006355(regulation of transcription, DNA-templated)	NA	NA	NA	Dehydration-responsive element-binding protein 1B	protein_coding	3.01358	0.333528	1.18084	1.26804	1.46423	5.9507	0.834804	0.42529	2.97604	0.751035	1.81808	2.92419	10.6865	5.0114	3.4893	17.2542	1.83147	6.21254	136	16	55	47	53	277	38	23	149	34	108	164	565	184	200	978	87	349
Zm00001d021300	chr7	148227448	148227942	-	Zm00001d021300	Zm00001d021300_T001	GO:0000786(nucleosome);GO:0000790(nuclear chromatin);GO:0003677(DNA binding);GO:0005634(nucleus);GO:0005694(chromosome);GO:0006325(chromatin organization);GO:0006342(chromatin silencing);GO:0046982(protein heterodimerization activity)	NA	K11251	NA	Histone H2A	protein_coding	40.2395	48.1	66.218	7.73859	15.9032	19.2542	64.9636	64.9417	57.4919	14.6085	9.5721	11.9319	3.7667	2.95987	3.08672	0.923211	2.33493	5.55701	1144	1396	1932	181	358	566	1822	2187	1814	409	359	423	126	69	112	34	70	197
Zm00001d021304	chr7	148348269	148353225	-	Zm00001d021304	Zm00001d021304_T001	GO:0000272(polysaccharide catabolic process);GO:0003824(catalytic activity);GO:0004553(hydrolase activity, hydrolyzing O-glycosyl compounds);GO:0005975(carbohydrate metabolic process);GO:0008152(metabolic process);GO:0008810(cellulase activity);GO:0016020(membrane);GO:0016021(integral component of membrane);GO:0016787(hydrolase activity);GO:0016798(hydrolase activity, acting on glycosyl bonds);GO…	NA	NA	NA	Endoglucanase 2	protein_coding	8.27547	12.3455	6.07172	2.62648	4.31934	2.4879	4.31334	15.0104	4.89739	7.97875	33.1833	19.712	9.64932	3.27187	7.04631	9.97077	27.4012	11.0903	1100	1675	829	287	454	342	566	2363	723	1045	5810	3264	1507	355	1192	1669	3814	1838
Zm00001d021410	chr7	151481395	151484398	+	Zm00001d021410	Zm00001d021410_T001	GO:0004310(farnesyl-diphosphate farnesyltransferase activity);GO:0006696(ergosterol biosynthetic process);GO:0008299(isoprenoid biosynthetic process);GO:0009058(biosynthetic process);GO:0009507(chloroplast);GO:0009536(plastid);GO:0010287(plastoglobule);GO:0016020(membrane);GO:0016021(integral component of membrane);GO:0016117(carotenoid biosynthetic process);GO:0016120(carotene biosynthetic proce…	NA	NA	NA	Phytoene synthase chloroplastic	protein_coding	3.54271	2.63452	3.69071	8.56863	20.8157	20.1127	4.69794	1.07674	9.00782	1.35774	3.7651	3.2566	9.8685	4.53922	7.91561	11.1492	14.8949	23.5983	347	264	371	689	1611	2034	454	125	979	131	486	398	1136	363	987	1375	1528	2881
Zm00001d021422	chr7	151786254	151786667	+	Zm00001d021422	Zm00001d021422_T001	GO:0000786(nucleosome);GO:0003677(DNA binding);GO:0005634(nucleus);GO:0005694(chromosome);GO:0005730(nucleolus);GO:0005774(vacuolar membrane);GO:0005829(cytosol);GO:0005886(plasma membrane);GO:0006334(nucleosome assembly);GO:0009414(response to water deprivation);GO:0009506(plasmodesma);GO:0009507(chloroplast);GO:0009579(thylakoid);GO:0042025(host cell nucleus);GO:0046982(protein heterodimerizati…	NA	NA	NA	Histone H4	protein_coding	247.377	115.295	259.439	10.9094	30.0898	34.3878	97.6426	67.8895	100.019	123.869	328.54	426.598	51.5751	101.124	97.5245	95.1809	177.208	508.65	5881	2798	6331	213	566	845	2290	1912	2639	2900	10291	12635	1441	1961	2951	2851	4412	15075
Zm00001d021444	chr7	152348851	152351171	+	Zm00001d021444	Zm00001d021444_T001	GO:0004497(monooxygenase activity);GO:0004499(N,N-dimethylaniline monooxygenase activity);GO:0016491(oxidoreductase activity);GO:0050660(flavin adenine dinucleotide binding);GO:0050661(NADP binding);GO:0055114(oxidation-reduction process)	NA	NA	NA	Monooxygenase/ oxidoreductase	protein_coding	32.2426	43.7059	43.0584	0.290972	0.546343	0.523461	32.65	47.5409	41.629	32.734	28.0539	29.1379	3.24309	3.17531	9.23386	0.088096	0.238555	0.369489	3266	4519	4477	25	44	55	3263	5705	4680	3266	3745	3678	386	263	1191	12	26	47
Zm00001d021519	chr7	154989542	154995305	+	Zm00001d021519	Zm00001d021519_T001;Zm00001d021519_T002	GO:0005886(plasma membrane);GO:0016020(membrane);GO:0016021(integral component of membrane);GO:0022857(transmembrane transporter activity);GO:0055085(transmembrane transport);GO:0055085(transmembrane transport)	NA	NA	NA	Nucleobase-ascorbate transporter 11	protein_coding	1.378	3.76704	1.40292	4.28387	6.55147	6.23209	0.321903	6.11802	0.390703	3.81221	4.05733	1.5947	28.5214	10.2716	8.15035	0.0216324	0.187285	0.148156	215	600	226	550	808	1004	50	1130	68	586	834	311	5225	1306	1618	5	31	29
Zm00001d021569	chr7	156294946	156300431	-	Zm00001d021569	Zm00001d021569_T001	GO:0006855(drug transmembrane transport);GO:0015238(GO_0015238);GO:0015297(antiporter activity);GO:0016020(membrane);GO:0016021(integral component of membrane);GO:0022857(transmembrane transporter activity);GO:0042908(xenobiotic transport);GO:0042910(xenobiotic transmembrane transporter activity);GO:0055085(transmembrane transport)	NA	K03327	NA	Transparent testa 12 protein	protein_coding	5.58231	3.26248	1.47489	40.9374	53.1424	58.7413	14.9657	8.33241	14.8287	1.73991	1.75991	3.19312	11.7609	5.97899	11.6614	26.8326	58.1684	93.1126	576	344	157	3463	4329	6252	1522	1018	1697	177	240	411	1425	503	1530	3484	6280	11965
Zm00001d021596	chr7	157694972	157698287	-	adenosine 5'-phosphosulfate reductase-like1	Zm00001d021596_T001;Zm00001d021596_T002;Zm00001d021596_T003;Zm00001d021596_T004	GO:0003824(catalytic activity);GO:0004604(phosphoadenylyl-sulfate reductase (thioredoxin) activity);GO:0005623(cell);GO:0016671(oxidoreductase activity, acting on a sulfur group of donors, disulfide as acceptor);GO:0019344(cysteine biosynthetic process);GO:0019419(sulfate reduction);GO:0045454(cell redox homeostasis);GO:0055114(oxidation-reduction process);GO:0055114(oxidation-reduction process)	NA	NA	NA	adenosine 5'-phosphosulfate reductase-like1	protein_coding	31.7159	25.2697	13.1655	70.4296	64.9645	41.2092	22.3165	27.3079	14.9394	10.4124	56.3433	45.5708	227.21	127.241	251.964	1647.34	1791.34	609.834	3664	2980	1562	6678	5932	4917	2544	3738	1916	1185	8578	6560	30844	11990	37042	239729	216748	87833
Zm00001d021613	chr7	158092346	158095496	-	Zm00001d021613	Zm00001d021613_T001	GO:0005515(protein binding);GO:0005737(cytoplasm)	NA	NA	NA	Ankyrin repeat family protein	protein_coding	2.70301	3.7788	2.63492	1.95688	3.59559	2.99228	2.00166	3.226	2.32408	1.82624	3.48317	2.74229	1.69125	0.795055	0.880693	0.549563	0.189679	0.749289	355	506	355	211	373	406	259	502	339	236	602	449	261	86	147	91	27	123
Zm00001d021629	chr7	158563700	158567974	+	Zm00001d021629	Zm00001d021629_T001;Zm00001d021629_T002;Zm00001d021629_T003;Zm00001d021629_T004	GO:0006855(drug transmembrane transport);GO:0015238(GO_0015238);GO:0015297(antiporter activity);GO:0016020(membrane);GO:0016021(integral component of membrane);GO:0022857(transmembrane transporter activity);GO:0042908(xenobiotic transport);GO:0042910(xenobiotic transmembrane transporter activity);GO:0055085(transmembrane transport);GO:0055085(transmembrane transport)	NA	K03327	NA	Protein DETOXIFICATION 40	protein_coding	0.170444	1.86168	0.082333	0.217644	0.034063	0.447995	0.069735	2.16379	0.029094	27.6538	28.9087	32.1079	0.469964	0.250285	1.67662	14.4776	5.83678	0.363276	38	416	19	40	6	102	16	561	8	5949	8321	8739	121	45	467	3984	1336	99
Zm00001d021680	chr7	159839512	159843067	+	Zm00001d021680	Zm00001d021680_T001	GO:0016020(membrane);GO:0016021(integral component of membrane)	NA	NA	NA		protein_coding	0.420558	0.0001	0.094913	2.52391	6.35391	6.59949	1.27523	0.459229	1.14566	0.054427	0.274286	0.153327	1.23064	0.379573	1.02567	1.74825	1.2107	10.8974	31	0	7	149	361	489	91	40	92	4	26	14	104	23	94	158	91	975
Zm00001d021682	chr7	159932805	159938980	+	Zm00001d021682	Zm00001d021682_T001	GO:0004672(protein kinase activity);GO:0004674(protein serine/threonine kinase activity);GO:0005524(ATP binding);GO:0005886(plasma membrane);GO:0006468(protein phosphorylation);GO:0016020(membrane);GO:0016021(integral component of membrane);GO:0016301(kinase activity);GO:0016310(phosphorylation)	NA	NA	NA	Cysteine-rich receptor-like protein kinase 25	protein_coding	0.0001	0.223117	0.248569	7.06838	16.3767	14.5715	1.65013	0.351139	0.646803	0.095998	0.0001	0.020595	0.612419	0.393378	0.832416	0.0001	0.0001	0.098969	0	34	38	851	1897	2205	239	61	106	14	0	4	106	48	156	0	0	19
Zm00001d021689	chr7	160134485	160142314	-	Zm00001d021689	Zm00001d021689_T001;Zm00001d021689_T002;Zm00001d021689_T003;Zm00001d021689_T004;Zm00001d021689_T005	GO:0004672(protein kinase activity);GO:0004674(protein serine/threonine kinase activity);GO:0005524(ATP binding);GO:0005886(plasma membrane);GO:0006468(protein phosphorylation);GO:0016020(membrane);GO:0016021(integral component of membrane);GO:0016301(kinase activity);GO:0016310(phosphorylation);GO:0016310(phosphorylation)	NA	NA	NA	Receptor-like protein kinase RK20-1	protein_coding	9.47349	13.424	5.11212	3.45698	4.90117	4.51562	1.51717	14.8187	2.13046	2.44887	2.59779	2.42359	0.912112	0.456951	0.883515	0.426632	0.655714	0.156902	1346	1946	746	404	552	663	213	2493	337	344	489	430	154	55	161	77	99	29
Zm00001d021746	chr7	162139179	162140330	-	Zm00001d021746	Zm00001d021746_T001	GO:0005515(protein binding)	NA	NA	NA	Octicosapeptide/Phox/Bem1p family protein	protein_coding	3.82061	9.03739	7.92628	0.131897	0.681249	0.381818	4.29794	6.01165	9.4263	4.47121	13.207	6.89256	3.48591	1.70383	2.25046	0.513188	0.789082	0.571883	253	611	539	8	36	27	281	472	693	292	1152	569	271	92	190	43	55	48
Zm00001d021755	chr7	162356389	162357840	+	Zm00001d021755	Zm00001d021755_T001	GO:0008194(UDP-glycosyltransferase activity);GO:0016740(transferase activity);GO:0016757(transferase activity, transferring glycosyl groups);GO:0016758(transferase activity, transferring hexosyl groups);GO:0043231(intracellular membrane-bounded organelle)	NA	NA	NA	UDP-glycosyltransferase 88A1	protein_coding	5.8168	7.47786	4.12978	1.27991	0.964433	0.261424	12.8266	8.30214	8.49626	6.93356	9.1413	6.33695	0.075944	0.0001	0.136862	0.798952	2.36768	1.02688	485	637	354	88	64	23	1055	821	787	570	1005	659	8	0	15	84	207	107
Zm00001d021773	chr7	162780554	162780784	+	Zm00001d021773	Zm00001d021773_T001	NA	NA	NA	NA		protein_coding	44.0733	63.4978	38.5775	467.827	754.476	628.161	81.6699	148.259	108.951	22.15	40.6899	44.2609	320.037	237.954	235.903	38.5687	13.2519	45.0278	585	860	526	5093	7909	8604	1069	2330	1604	290	712	732	4988	2575	3982	645	185	745
Zm00001d021781	chr7	162910507	162912123	+	Zm00001d021781	Zm00001d021781_T001	GO:0016020(membrane);GO:0016021(integral component of membrane);GO:0022857(transmembrane transporter activity);GO:0055085(transmembrane transport)	NA	NA	NA	Organic cation/carnitine transporter 3	protein_coding	1.42164	1.25405	0.531086	37.1887	56.9964	15.2992	36.9555	5.21039	62.1837	0.626732	5.02337	2.86954	185.098	62.8508	69.6077	0.095991	0.442877	0.252381	132	119	51	2834	4183	1467	3385	574	6409	58	615	332	20195	4760	8225	12	44	30
Zm00001d021824	chr7	163783014	163786827	-	Zm00001d021824	Zm00001d021824_T001;Zm00001d021824_T002	GO:0009055(electron transfer activity);GO:0020037(heme binding);GO:0022900(electron transport chain);GO:0046872(metal ion binding);GO:0046872(metal ion binding)	00195(Photosynthesis);00195(Photosynthesis)	K08906	NA		protein_coding	30.0985	28.8108	23.2184	12.4483	7.79791	10.832	7.07781	21.0961	8.4651	11.3326	17.0564	20.0274	4.75545	5.42103	5.09182	2.32564	3.55078	2.66401	5336	5214	4226	1812	1093	1983	1239	4431	1667	1980	3985	4424	992	784	1149	520	661	590
Zm00001d021867	chr7	164948984	164951369	-	Zm00001d021867	Zm00001d021867_T001	GO:0000350(generation of catalytic spliceosome for second transesterification step);GO:0005681(spliceosomal complex);GO:0005682(U5 snRNP);GO:0008380(RNA splicing);GO:0046540(U4/U6 x U5 tri-snRNP complex);GO:0071021(U2-type post-spliceosomal complex);GO:0071048(nuclear retention of unspliced pre-mRNA at the site of transcription)	NA	NA	NA	splicing factor Prp18 family protein	protein_coding	10.7101	8.56069	9.19004	24.9451	30.6887	32.4664	19.4394	12.414	23.2809	2.77764	4.3079	3.35479	16.2663	9.54964	10.8423	4.77815	4.97085	8.42157	991	809	873	1894	2244	3102	1774	1361	2391	254	526	387	1769	721	1277	557	482	972
Zm00001d021892	chr7	165528436	165529362	-	AP2-EREBP-transcription factor 201	Zm00001d021892_T001	GO:0003677(DNA binding);GO:0003700(DNA-binding transcription factor activity);GO:0005634(nucleus);GO:0006351(transcription, DNA-templated);GO:0006355(regulation of transcription, DNA-templated)	NA	K09286	NA	Ethylene-responsive transcription factor RAP2-11	protein_coding	0.383784	0.088834	0.250146	0.23503	0.163869	0.058462	0.0001	0.269366	0.188226	0.321763	1.09956	1.89896	2.97299	4.50536	7.96918	1.37572	1.23269	0.670101	21	5	14	11	7	4	0	17	12	17	78	126	186	196	540	93	69	45
Zm00001d021899	chr7	165624232	165629431	+	Zm00001d021899	Zm00001d021899_T001;Zm00001d021899_T002	GO:0016787(hydrolase activity);GO:0016787(hydrolase activity)	NA	NA	NA	alpha/beta-Hydrolases superfamily protein	protein_coding	20.153	17.3281	21.2799	7.56192	9.52568	7.36979	17.7718	11.192	20.363	2.28127	1.68443	1.78777	0.822848	0.233258	1.23308	5.11114	2.67286	2.92232	2127	1867	2305	655	795	804	1850	1400	2385	238	235	236	102	21	166	680	296	386
Zm00001d021995	chr7	167680342	167681551	+	Zm00001d021995	Zm00001d021995_T001	GO:0010468(regulation of gene expression)	NA	NA	NA	LOB domain-containing protein 38	protein_coding	16.4071	2.05603	0.955871	7.22961	3.00199	8.77913	1.93885	0.731465	0.760455	9.1079	5.14796	7.89769	0.85338	1.58498	0.858155	5.47023	4.32912	9.71893	986	127	59	357	143	545	115	53	51	539	408	591	61	78	66	414	273	728
Zm00001d022006	chr7	167846765	167848830	-	Zm00001d022006	Zm00001d022006_T001	NA	NA	NA	NA	Lipase-like protein	protein_coding	5.09617	4.29804	3.28648	1.84175	2.36962	3.64893	0.376885	1.73107	0.347282	1.9193	4.83293	5.83305	0.744879	0.515817	0.744781	2.4885	2.06788	10.1107	565	486	374	168	208	418	42	228	43	210	706	805	97	47	105	348	240	1397
Zm00001d022233	chr7	173365923	173367322	-	Zm00001d022233	Zm00001d022233_T001	NA	NA	NA	NA		protein_coding	0.0001	0.0001	0.0001	0.0001	0.0001	0.155746	0.0001	0.0001	0.0001	1.45084	4.9637	2.45811	11.4479	5.71853	12.3079	3.05101	2.55462	0.967873	0	0	0	0	0	8	0	0	0	67	305	143	626	217	729	179	125	57
Zm00001d022420	chr7	177288787	177289404	-	Zm00001d022420	Zm00001d022420_T001	NA	NA	NA	NA	Stress responsive protein	protein_coding	77.5419	13.1139	37.1399	206.996	190.135	407.9	756.528	211.271	666.462	112.129	239.872	406.944	2112.05	638.563	1608.06	1281.56	1268.8	2629.36	2752	476	1353	6029	5333	14947	26484	8883	26249	3919	11216	17992	88066	18481	72613	57285	47156	116320
Zm00001d022445	chr7	177898812	177903461	-	Zm00001d022445	Zm00001d022445_T001;Zm00001d022445_T002	GO:0003824(catalytic activity);GO:0004553(hydrolase activity, hydrolyzing O-glycosyl compounds);GO:0004557(alpha-galactosidase activity);GO:0005975(carbohydrate metabolic process);GO:0008152(metabolic process);GO:0009505(plant-type cell wall);GO:0016787(hydrolase activity);GO:0016798(hydrolase activity, acting on glycosyl bonds);GO:0052692(raffinose alpha-galactosidase activity);GO:0052692(raffin…	00052(Galactose metabolism);00561(Glycerolipid metabolism);00600(Sphingolipid metabolism);00603(Glycosphingolipid biosynthesis - globo and isoglobo series);00603(Glycosphingolipid biosynthesis - globo and isoglobo series)	K07407	EC:3.2.1.22	Alpha-galactosidase 3	protein_coding	18.9461	14.7093	11.3886	91.3276	87.0578	115.739	27.5406	31.3691	29.0724	8.55858	10.0459	13.2064	376.324	231.14	237.249	40.417	40.2949	126.314	1957	1552	1208	7743	7109	12347	2807	3839	3334	871	1368	1700	45679	19475	31186	5260	4361	16268
Zm00001d022454	chr7	178054205	178059227	+	Zm00001d022454	Zm00001d022454_T001;Zm00001d022454_T002;Zm00001d022454_T003;Zm00001d022454_T004	GO:0005515(protein binding);GO:0005515(protein binding)	NA	NA	NA	F-box family protein	protein_coding	0.580647	0.565698	0.248116	0.665121	1.81408	1.40547	0.369884	0.734394	0.251693	4.22349	3.17225	3.57051	23.1339	15.8306	19.2259	8.41596	4.07555	8.32627	137	137	61	129	338	342	87	206	66	977	983	1046	6382	3032	5744	2491	1003	2439
Zm00001d022516	chr7	179243833	179244627	+	Zm00001d022516	Zm00001d022516_T001	NA	NA	NA	NA	Stress responsive protein	protein_coding	38.8194	6.88278	21.0541	97.9699	86.1156	198.055	283.848	107.975	334.693	162.421	533.308	824.772	1716.42	831.049	1799.51	2290.3	2553.53	3700.89	1772	321	987	3671	3107	9336	12783	5840	16958	7302	32079	46908	92068	30941	104530	131695	122084	210614
Zm00001d022518	chr7	179280394	179282173	+	Zm00001d022518	Zm00001d022518_T001;Zm00001d022518_T002	GO:0005623(cell);GO:0016020(membrane);GO:0016021(integral component of membrane);GO:0045454(cell redox homeostasis);GO:0045454(cell redox homeostasis)	NA	NA	NA	Thioredoxin-like 1-1 chloroplastic	protein_coding	6.86919	20.4447	6.77992	119.279	167.483	131.341	7.32694	65.5288	8.94723	0.885345	2.69821	2.21827	71.1254	34.6555	62.7723	0.247741	0.487835	3.37959	521	1580	527	7409	10018	10265	548	5876	752	67	270	210	6326	2140	6046	25	39	320
Zm00001d022529	chr7	179415995	179417774	+	Zm00001d022529	Zm00001d022529_T001	GO:0016020(membrane);GO:0016021(integral component of membrane);GO:0016787(hydrolase activity)	NA	NA	NA	alpha/beta-Hydrolases superfamily protein	protein_coding	4.94093	7.46002	6.8297	0.85014	0.891671	2.23676	3.20738	3.8908	1.15912	7.37973	3.79466	4.19211	0.171936	0.068536	0.268303	8.03178	11.4825	25.9284	459	707	651	65	66	215	294	428	120	675	464	485	19	6	32	939	1116	3000
Zm00001d022564	chr7	180078570	180085192	-	Zm00001d022564	Zm00001d022564_T001	GO:0046872(metal ion binding)	NA	NA	NA	BRCT domain-containing protein	protein_coding	0.140092	0.314256	0.466981	0.283742	0.572127	0.537275	0.805519	0.338054	0.633862	0.517972	0.86019	0.635595	1.70202	1.86746	2.34645	1.25465	1.08148	1.57997	38	86	129	63	121	149	213	108	189	137	304	212	535	408	799	423	303	527
Zm00001d022594	chr7	180721223	180728877	-	phospholipase D11	Zm00001d022594_T001;Zm00001d022594_T002;Zm00001d022594_T003;Zm00001d022594_T004;Zm00001d022594_T005;Zm00001d022594_T006;Zm00001d022594_T007;Zm00001d022594_T009;Zm00001d022594_T010;Zm00001d022594_T011	GO:0003824(catalytic activity);GO:0004630(phospholipase D activity);GO:0005509(calcium ion binding);GO:0005886(plasma membrane);GO:0009395(phospholipid catabolic process);GO:0016020(membrane);GO:0016042(lipid catabolic process);GO:0016787(hydrolase activity);GO:0046470(phosphatidylcholine metabolic process);GO:0070290(N-acylphosphatidylethanolamine-specific phospholipase D activity);GO:0070290(N-…	NA	NA	NA	phospholipase D11	protein_coding	0.256876	0.791362	0.581348	1.35731	1.12431	0.960103	2.18765	0.705337	2.66242	1.07324	1.31541	1.10033	3.39933	2.22172	2.89283	1.89859	2.74422	7.52199	80	245	181	338	269	300	654	254	894	321	525	415	1209	550	1113	723	869	2834
Zm00001d022619	chr7	181212863	181216786	-	Zm00001d022619	Zm00001d022619_T001	GO:0003688(DNA replication origin binding);GO:0003690(double-stranded DNA binding);GO:0003697(single-stranded DNA binding);GO:0005634(nucleus);GO:0006260(DNA replication);GO:0006270(DNA replication initiation);GO:0031298(replication fork protection complex)	NA	K10736	NA	minichromosome maintenance 10	protein_coding	1.53959	3.65264	1.68764	0.781842	0.909258	1.41578	1.17364	3.32472	0.584591	12.6444	15.3572	13.6675	4.46261	3.81981	6.11674	5.33079	7.38295	6.52653	143	345	160	60	67	135	107	364	60	1150	1868	1572	484	288	719	620	714	751
Zm00001d022965	chr1	257829203	257830028	-	Zm00001d022965	Zm00001d022965_T001	NA	NA	NA	NA		lincRNA	0.0001	0.0001	0.206721	4.9948	1.87777	6.68313	9.0502	2.00699	9.82616	0.0001	0.058006	0.0001	2.00232	0.86739	2.01922	0.385502	0.093665	3.19925	0	0	9	170	62	285	369	99	451	0	4	0	98	30	107	21	5	165
Zm00001d023122	chr10	72953504	72954126	-	Zm00001d023122	Zm00001d023122_T001	NA	NA	NA	NA		lincRNA	0.0001	0.0001	0.0001	0.0001	0.0001	0.0001	0.0001	0.0001	0.0001	0.796591	1.8149	2.282	6.7028	5.72947	4.70148	1.60283	2.87337	2.82084	0	0	0	0	0	0	0	0	0	29	86	102	282	168	215	73	108	126
Zm00001d023299	chr10	2352030	2356262	+	Zm00001d023299	Zm00001d023299_T001;Zm00001d023299_T002;Zm00001d023299_T003;Zm00001d023299_T004;Zm00001d023299_T005;Zm00001d023299_T006;Zm00001d023299_T007;Zm00001d023299_T008;Zm00001d023299_T009;Zm00001d023299_T010	GO:0003676(nucleic acid binding);GO:0003723(RNA binding);GO:0046872(metal ion binding);GO:0046872(metal ion binding)	NA	NA	NA	Zinc finger CCCH domain-containing protein 46	protein_coding	1.07554	0.855668	1.21547	0.669597	0.945403	0.535209	1.37534	0.528873	1.80514	6.19486	3.66036	4.80151	2.58488	1.24109	2.90646	3.05713	1.85517	6.28453	190	154	219	97	132	98	239	110	352	1070	846	1050	533	179	650	676	342	1373
Zm00001d023353	chr10	3995907	3997196	+	Zm00001d023353	Zm00001d023353_T001	GO:0000166(nucleotide binding);GO:0004672(protein kinase activity);GO:0004674(protein serine/threonine kinase activity);GO:0005524(ATP binding);GO:0006468(protein phosphorylation);GO:0007165(signal transduction);GO:0016301(kinase activity);GO:0016310(phosphorylation);GO:0016740(transferase activity)	NA	NA	NA	CBL-interacting serine/threonine-protein kinase 10	protein_coding	3.73089	3.52704	4.06178	1.82098	4.91476	3.89207	1.34619	2.33983	0.764042	1.59094	2.72515	2.06135	0.247098	0.248959	0.225981	0.055732	0.1112	0.197669	277	267	309	111	288	298	99	206	63	117	266	191	22	16	22	6	9	19
Zm00001d023384	chr10	4335098	4336256	-	Zm00001d023384	Zm00001d023384_T001	GO:0005576(extracellular region);GO:0007165(signal transduction);GO:0008083(growth factor activity);GO:0008283(cell population proliferation)	NA	NA	NA	Phytosulfokines 2	protein_coding	0.590142	1.68446	1.25204	0.437214	0.093227	0.208528	0.603018	0.94322	0.245386	4.68592	3.83491	4.0862	25.2476	22.7712	126.282	3.48606	2.08819	40.9978	35	101	76	21	5	13	35	66	16	270	296	298	1735	1086	9394	257	128	2988
Zm00001d023387	chr10	4374702	4375148	-	Zm00001d023387	Zm00001d023387_T001	GO:0006979(response to oxidative stress);GO:0009061(anaerobic respiration)	NA	NA	NA	AT3g10020/T22K18_16; Expressed protein; protein	protein_coding	0.305476	0.218325	0.0001	73.0282	90.8949	185.996	11.0976	1.84993	1.32784	0.271132	0.385568	0.228906	13.037	3.32548	4.63881	3.60729	13.5483	478.516	8	6	0	1539	1844	4930	282	57	38	7	14	8	394	70	152	117	365	15312
Zm00001d023395	chr10	4672326	4673327	-	Zm00001d023395	Zm00001d023395_T001	NA	NA	NA	NA	Stress-response A/B barrel domain-containing protein	protein_coding	18.2804	5.23809	6.08485	17.092	11.6426	12.5111	148.26	20.3117	76.3061	94.8404	138.53	137.91	54.5423	29.5237	95.244	835.298	693.762	464.466	926	271	317	711	466	655	7408	1219	4290	4731	9245	8702	3246	1220	6138	53287	36799	29325
Zm00001d023402	chr10	4740647	4742679	-	G2-like-transcription factor 4	Zm00001d023402_T001;Zm00001d023402_T002	GO:0003677(DNA binding);GO:0005634(nucleus);GO:0016020(membrane);GO:0016021(integral component of membrane);GO:0016021(integral component of membrane)	NA	NA	NA	Putative MYB DNA-binding domain superfamily protein	protein_coding	6.9101	3.47613	5.7466	0.766778	0.613524	0.371709	2.00134	0.660273	0.919601	32.3786	71.8673	91.424	17.472	10.0399	7.10041	105.277	101.302	96.9528	676	347	577	62	48	38	194	77	100	3119	9261	11139	2008	801	884	12968	10375	11820
Zm00001d023521	chr10	8653575	8659968	+	Zm00001d023521	Zm00001d023521_T001;Zm00001d023521_T002;Zm00001d023521_T003;Zm00001d023521_T004;Zm00001d023521_T005;Zm00001d023521_T006;Zm00001d023521_T007;Zm00001d023521_T008;Zm00001d023521_T009	GO:0044255(cellular lipid metabolic process);GO:0044255(cellular lipid metabolic process)	NA	NA	NA	Putative serine esterase family protein	protein_coding	3.37492	2.20907	2.69304	6.29906	6.72417	12.1916	8.40082	5.43202	10.3111	1.11424	2.71062	1.90236	3.75701	3.12738	4.82787	1.83798	1.55754	3.29569	750	502	614	1149	1181	2796	1841	1431	2542	245	794	527	983	568	1368	515	364	914
Zm00001d023664	chr10	14448534	14451513	+	Zm00001d023664	Zm00001d023664_T001	GO:0009793(embryo development ending in seed dormancy);GO:0009845(seed germination);GO:0010029(regulation of seed germination);GO:0098755(maintenance of seed dormancy by absisic acid)	NA	NA	NA	ABA-responsive protein	protein_coding	1.07864	0.662305	0.173144	20.9998	44.753	82.9753	12.5154	1.53007	7.43583	1.02982	1.53729	1.1604	15.886	12.8747	9.12922	2.95968	7.16647	93.8167	80	50	14	1274	2614	6332	913	134	610	75	150	107	1380	776	859	276	555	8644
Zm00001d023669	chr10	14594105	14596141	+	NAC-transcription factor 67	Zm00001d023669_T001	GO:0003677(DNA binding);GO:0005634(nucleus);GO:0006355(regulation of transcription, DNA-templated)	NA	NA	NA	Putative NAC domain transcription factor superfamily protein	protein_coding	4.03878	2.50115	3.42274	7.75567	6.95735	18.8561	11.8695	5.42206	13.1654	3.35408	10.241	8.96571	36.9271	25.5691	38.3643	10.5016	12.7676	41.2611	448	283	390	706	610	2158	1298	712	1620	367	1496	1238	4809	2312	5411	1466	1482	5701
Zm00001d023677	chr10	15030181	15032801	+	sugars will eventually be exported transporter13a	Zm00001d023677_T001	GO:0005886(plasma membrane);GO:0008643(carbohydrate transport);GO:0016020(membrane);GO:0016021(integral component of membrane);GO:0034219(carbohydrate transmembrane transport);GO:0051119(sugar transmembrane transporter activity)	NA	K15382	NA	sugars will eventually be exported transporter13a	protein_coding	27.9822	11.2956	46.3659	149.255	105.787	93.8504	281.329	83.2704	283.347	57.817	87.1745	88.5879	523.741	422.453	815.489	580.289	542.096	1082.6	2455	1012	4176	10747	7336	8503	24351	8656	27593	4996	10079	9684	53996	30230	91046	64133	49814	118415
Zm00001d023699	chr10	16081385	16082904	+	Zm00001d023699	Zm00001d023699_T001	GO:0005739(mitochondrion);GO:0005960(glycine cleavage complex);GO:0019464(glycine decarboxylation via glycine cleavage system)	NA	NA	NA	glycine cleavage system protein H1	protein_coding	234.834	265.548	298.572	88.883	126.825	125.927	125.338	238.563	117.492	892.706	578.505	696.978	215.16	160.854	312.82	505.563	395.42	183.166	12230	14117	15961	3799	5220	6773	6440	14720	6792	45786	39700	45225	13167	6833	20731	33166	21569	11893
Zm00001d023781	chr10	19951902	19954382	-	Zm00001d023781	Zm00001d023781_T001	GO:0003723(RNA binding);GO:0003729(mRNA binding);GO:0005737(cytoplasm);GO:0010608(posttranscriptional regulation of gene expression)	NA	NA	NA	Putative pumilio homolog 7 chloroplastic	protein_coding	186.252	203.493	266.077	0.0001	0.398956	0.0001	29.3004	89.3137	27.2775	189.477	179.263	172.034	0.582511	0.534875	2.41656	0.223421	0.456881	0.987671	19827	22113	29075	0	34	0	3078	11265	3224	19865	25146	22818	73	47	328	30	51	132
Zm00001d023846	chr10	24407598	24410255	-	Zm00001d023846	Zm00001d023846_T001;Zm00001d023846_T002;Zm00001d023846_T003;Zm00001d023846_T004;Zm00001d023846_T005;Zm00001d023846_T006;Zm00001d023846_T007;Zm00001d023846_T008	GO:0006511(ubiquitin-dependent protein catabolic process);GO:0016567(protein ubiquitination);GO:0016874(ligase activity);GO:0061630(ubiquitin protein ligase activity);GO:0061630(ubiquitin protein ligase activity)	NA	NA	NA	ERAD-associated E3 ubiquitin-protein ligase HRD1A	protein_coding	0.736182	0.793715	0.694834	2.57369	3.54603	3.66578	3.17616	1.10067	3.11422	10.1158	12.373	11.6005	24.6523	16.2767	29.4458	11.5594	10.6087	16.7985	52	56	49	146	192	259	215	90	238	683	1117	990	1983	910	2565	997	762	1434
Zm00001d024143	chr10	49101829	49103014	+	Zm00001d024143	Zm00001d024143_T001	NA	NA	NA	NA		protein_coding	0.909407	1.1405	6.55541	76.0206	33.1371	139.705	215.723	50.9926	178.428	0.767933	1.02072	1.56589	391.62	191.697	89.7856	0.201233	0.186129	0.081562	34	44	249	2307	969	5335	7870	2234	7324	28	50	73	17017	5782	4225	10	8	4
Zm00001d024250	chr10	59563488	59563745	+	Zm00001d024250	Zm00001d024250_T001	NA	NA	NA	NA		protein_coding	57.4854	6.69141	5.69168	0.696413	21.4035	8.15213	1.20792	0.885034	5.41851	3.61819	58.2741	46.7908	0.0001	0.0001	0.0001	24.5257	107.855	2.39686	852	102	87	9	251	125	18	16	90	53	1138	864	0	0	0	458	1674	45
Zm00001d024258	chr10	59906061	59918458	+	Zm00001d024258	Zm00001d024258_T001	GO:0016491(oxidoreductase activity);GO:0046872(metal ion binding);GO:0051213(dioxygenase activity);GO:0055114(oxidation-reduction process)	NA	NA	NA	Probable 2-oxoacid dependent dioxygenase	protein_coding	39.1607	25.3584	33.0111	3.97871	7.87177	4.76622	5.88026	14.3069	8.27595	1.3068	1.09667	0.831815	0.283502	0.0001	0.714181	1.51261	1.37638	1.25916	2172	1436	1880	182	346	273	322	941	510	72	81	58	19	0	51	106	80	88
Zm00001d024265	chr10	60015948	60017307	-	Zm00001d024265	Zm00001d024265_T001	GO:0005515(protein binding)	NA	NA	NA	F-box protein SKIP19	protein_coding	0.104947	0.0001	0.0001	18.3091	5.26314	21.6564	23.8032	3.68613	18.6916	0.052902	0.079641	0.24036	8.57005	3.21604	4.43251	0.083162	0.34536	2.8093	8	0	0	1077	299	1603	1683	313	1487	4	8	22	722	188	405	8	26	251
Zm00001d024268	chr10	60226179	60228837	+	NAC-transcription factor 110	Zm00001d024268_T001	GO:0003677(DNA binding);GO:0005634(nucleus);GO:0006355(regulation of transcription, DNA-templated)	NA	NA	NA	NAC domain-containing protein 21/22	protein_coding	1.20486	0.994439	0.811428	7.23067	15.5763	13.0546	13.5635	2.91108	11.0521	2.07655	2.08191	3.09683	31.964	23.3634	28.8026	41.8528	12.9573	5.05948	88	74	61	433	897	982	975	252	894	149	200	281	2735	1388	2669	3839	989	460
Zm00001d024291	chr10	62300386	62308465	+	Zm00001d024291	Zm00001d024291_T001;Zm00001d024291_T002;Zm00001d024291_T003;Zm00001d024291_T004;Zm00001d024291_T005;Zm00001d024291_T006;Zm00001d024291_T007	GO:0004672(protein kinase activity);GO:0004674(protein serine/threonine kinase activity);GO:0005524(ATP binding);GO:0005886(plasma membrane);GO:0006468(protein phosphorylation);GO:0016020(membrane);GO:0016021(integral component of membrane);GO:0016301(kinase activity);GO:0016310(phosphorylation);GO:0046777(protein autophosphorylation);GO:0046777(protein autophosphorylation)	NA	NA	NA	Putative leucine-rich repeat receptor-like protein kinase family protein	protein_coding	4.08848	8.79273	3.90545	4.05303	8.13118	9.24686	6.94858	10.8196	9.42833	1.89438	1.73946	1.01934	0.61241	0.732437	0.832331	0.192907	0.587064	0.343346	966	2120	947	787	1519	2256	1621	3028	2474	441	543	301	171	142	251	58	146	102
Zm00001d024314	chr10	63672420	63675196	-	Zm00001d024314	Zm00001d024314_T001;Zm00001d024314_T002	GO:0008270(zinc ion binding);GO:0009809(lignin biosynthetic process);GO:0016491(oxidoreductase activity);GO:0016616(oxidoreductase activity, acting on the CH-OH group of donors, NAD or NADP as acceptor);GO:0045551(cinnamyl-alcohol dehydrogenase activity);GO:0046872(metal ion binding);GO:0055114(oxidation-reduction process);GO:0055114(oxidation-reduction process)	NA	NA	NA	Putative cinnamyl-alcohol dehydrogenase family protein	protein_coding	1.12802	1.81624	2.25014	1.57781	9.85582	2.1769	11.8368	50.1793	8.18614	10.9997	31.2532	26.881	9.72631	2.56534	20.4792	387.514	650.324	347.46	102	167	208	117	700	202	1049	5339	816	973	3699	3008	1027	188	2341	43837	61167	38901
Zm00001d024324	chr10	64620725	64621285	+	AP2-EREBP-transcription factor 54	Zm00001d024324_T001	GO:0003677(DNA binding);GO:0003700(DNA-binding transcription factor activity);GO:0005634(nucleus);GO:0006351(transcription, DNA-templated);GO:0006355(regulation of transcription, DNA-templated)	NA	NA	NA	Putative AP2/EREBP transcription factor superfamily protein	protein_coding	0.345646	0.313856	0.0001	0.969905	1.05902	3.57033	3.14386	0.123329	4.06907	0.0001	0.916627	1.04418	6.11168	2.52639	4.61703	58.5374	1.16587	1.48379	12	11	0	26	27	119	100	5	146	0	39	42	232	67	190	2376	40	60
Zm00001d024423	chr10	70399874	70412898	+	DNA polymerase like1	Zm00001d024423_T001;Zm00001d024423_T002;Zm00001d024423_T003;Zm00001d024423_T005;Zm00001d024423_T006;Zm00001d024423_T008;Zm00001d024423_T009;Zm00001d024423_T010	GO:0003676(nucleic acid binding);GO:0003677(DNA binding);GO:0003887(DNA-directed DNA polymerase activity);GO:0005737(cytoplasm);GO:0006139(nucleobase-containing compound metabolic process);GO:0006260(DNA replication);GO:0006261(DNA-dependent DNA replication);GO:0008408(3'-5' exonuclease activity);GO:0008409(5'-3' exonuclease activity);GO:0071897(DNA biosynthetic process);GO:0090305(nucleic acid p…	NA	NA	NA	DNA polymerase like1	protein_coding	1.34087	0.2705	0.61391	0.693851	0.476778	0.849096	9.34752	3.3358	12.5378	0.566963	1.40783	0.342668	0.299743	0.0001	0.204188	0.0606241	0.0830464	0.0306274	398	83	187	169	112	260	2728	1169	4114	167	550	127	105	0	78	23	26	12
Zm00001d024531	chr10	76628321	76635128	+	Zm00001d024531	Zm00001d024531_T001;Zm00001d024531_T002;Zm00001d024531_T004;Zm00001d024531_T005;Zm00001d024531_T006;Zm00001d024531_T007	GO:0005794(Golgi apparatus);GO:0005802(trans-Golgi network);GO:0005886(plasma membrane);GO:0009833(plant-type primary cell wall biogenesis);GO:0016020(membrane);GO:0016021(integral component of membrane);GO:0016740(transferase activity);GO:0016757(transferase activity, transferring glycosyl groups);GO:0016760(cellulose synthase (UDP-forming) activity);GO:0030244(cellulose biosynthetic process);GO…	NA	K20923	EC:2.4.1.-	Putative cellulose synthase-like family protein	protein_coding	12.7723	7.19048	8.1159	1.07398	3.70886	5.45031	0.923447	7.10293	8.59702	23.3634	76.2273	12.7955	0.77157	0.493798	1.07612	20.0027	70.459	25.3917	3037	1747	1981	210	697	1339	217	2002	2269	5471	23883	3792	216	96	326	5992	17547	7527
Zm00001d024547	chr10	77722777	77724235	-	MYB-related-transcription factor 48	Zm00001d024547_T001	GO:0003677(DNA binding);GO:0005634(nucleus)	NA	NA	NA	Putative MYB DNA-binding domain superfamily protein	protein_coding	0.0001	0.0001	0.0001	72.9998	102.399	73.1264	4.30996	0.294442	6.1211	0.0001	0.481312	0.147319	52.8348	11.9492	48.7051	79.5586	67.6819	29.0515	0	0	0	630	851	794	45	4	72	0	7	2	653	103	652	1054	745	381
Zm00001d024598	chr10	79908936	79913706	-	Zm00001d024598	Zm00001d024598_T001	GO:0031047(gene silencing by RNA)	NA	NA	NA	Factor of DNA methylation 1	protein_coding	0.551458	0.151363	0.093372	0.367395	0.570443	0.708934	0.478098	0.285452	0.868771	0.834885	1.28104	1.54796	4.64635	3.86046	3.93282	4.14738	4.8202	4.77868	87	25	16	48	71	115	75	54	152	130	265	303	857	495	786	820	793	935
Zm00001d024710	chr10	84546907	84553622	+	Zm00001d024710	Zm00001d024710_T001;Zm00001d024710_T002;Zm00001d024710_T003;Zm00001d024710_T004;Zm00001d024710_T005;Zm00001d024710_T006;Zm00001d024710_T007;Zm00001d024710_T008;Zm00001d024710_T009;Zm00001d024710_T010;Zm00001d024710_T011;Zm00001d024710_T012;Zm00001d024710_T013;Zm00001d024710_T014;Zm00001d024710_T015;Zm00001d024710_T016;Zm00001d024710_T017;Zm00001d024710_T018;Zm00001d024710_T019;Zm00001d024710_T020…	GO:0004672(protein kinase activity);GO:0005524(ATP binding);GO:0006468(protein phosphorylation);GO:0016020(membrane);GO:0016021(integral component of membrane);GO:0016021(integral component of membrane)	NA	NA	NA		protein_coding	0.0001	0.0139621	0.0001	0.0124932	0.0001	0.0001	0.016989	0.0001	0.0001	0.822393	1.23965	1.05342	3.02079	2.55525	3.24886	1.10415	1.36845	0.76068	0	6	0	4	0	0	7	0	0	305	605	489	1317	772	1524	521	530	355
Zm00001d024713	chr10	84560055	84568649	-	Zm00001d024713	Zm00001d024713_T001;Zm00001d024713_T002;Zm00001d024713_T003;Zm00001d024713_T004;Zm00001d024713_T005;Zm00001d024713_T006;Zm00001d024713_T007;Zm00001d024713_T008;Zm00001d024713_T009;Zm00001d024713_T010;Zm00001d024713_T011;Zm00001d024713_T012;Zm00001d024713_T013;Zm00001d024713_T014;Zm00001d024713_T015;Zm00001d024713_T016;Zm00001d024713_T017;Zm00001d024713_T018;Zm00001d024713_T019;Zm00001d024713_T020…	GO:0003676(nucleic acid binding);GO:0004842(ubiquitin-protein transferase activity);GO:0016567(protein ubiquitination);GO:0030014(CCR4-NOT complex);GO:0030014(CCR4-NOT complex)	03018(RNA degradation);03018(RNA degradation)	K10643	EC:2.3.2.27	RNA binding (RRM/RBD/RNP motifs) family protein	protein_coding	0.0288051	0.0001	0.0816955	0.0113355	0.0353142	0.0231161	0.0463779	0.00788007	0.0223406	1.03477	3.21107	1.84794	5.61829	3.93228	6.72408	1.9049	1.14883	0.960188	13	0	38	4	12	10	19	4	11	418	1720	934	2678	1307	3466	974	490	492
Zm00001d024723	chr10	85128123	85133157	-	Zm00001d024723	Zm00001d024723_T001;Zm00001d024723_T002	GO:0001676(long-chain fatty acid metabolic process);GO:0003824(catalytic activity);GO:0004467(long-chain fatty acid-CoA ligase activity);GO:0005783(endoplasmic reticulum);GO:0010025(wax biosynthetic process);GO:0010143(cutin biosynthetic process);GO:0016020(membrane);GO:0016020(membrane)	00061(Fatty acid biosynthesis);00071(Fatty acid degradation);04146(Peroxisome);04146(Peroxisome)	K01897	EC:6.2.1.3	Long chain acyl-CoA synthetase 1	protein_coding	9.46639	11.6444	5.81615	1.19404	2.24988	2.2363	3.46067	81.8906	4.03928	14.5279	29.6942	22.8892	4.63852	3.89953	6.18419	3.5647	4.78023	4.5979	1355	1702	855	141	255	331	490	13889	642	2049	5602	4083	782	456	1128	644	717	821
Zm00001d024843	chr10	90456450	90457394	-	1-aminocyclopropane-1-carboxylate oxidase15	Zm00001d024843_T001	GO:0016491(oxidoreductase activity);GO:0046872(metal ion binding);GO:0051213(dioxygenase activity);GO:0055114(oxidation-reduction process)	00270(Cysteine and methionine metabolism)	K05933	EC:1.14.17.4	1-aminocyclopropane-1-carboxylate oxidase15	protein_coding	10.8433	4.62095	8.91631	29.3441	50.9973	63.3574	37.8402	11.3721	70.9768	2.08693	2.24581	2.25171	10.0189	4.60363	10.7058	4.10688	1.32746	5.04386	589	256	497	1307	2187	3551	2026	732	4275	112	161	153	639	204	740	281	76	342
Zm00001d024903	chr10	93908317	93911235	+	heat shock protein, 90 kDa	Zm00001d024903_T001	GO:0000166(nucleotide binding);GO:0005524(ATP binding);GO:0005737(cytoplasm);GO:0005829(cytosol);GO:0005886(plasma membrane);GO:0006457(protein folding);GO:0009816(defense response to bacterium, incompatible interaction);GO:0009986(cell surface);GO:0032991(protein-containing complex);GO:0034605(cellular response to heat);GO:0048471(perinuclear region of cytoplasm);GO:0050821(protein stabilization…	04141(Protein processing in endoplasmic reticulum);04626(Plant-pathogen interaction)	K04079	NA	heat shock protein 90 kDa	protein_coding	0.202115	0.242966	0.333564	40.6007	45.8526	75.99	8.70099	0.356406	1.6709	0.04552	0.172502	0.150597	7.96922	2.22958	2.85246	1.09042	1.85144	137.133	33	40	55	5342	5810	12580	1377	68	298	8	37	31	1502	292	582	221	311	27408
Zm00001d024934	chr10	95624162	95627278	-	Zm00001d024934	Zm00001d024934_T001	GO:0000139(Golgi membrane);GO:0005794(Golgi apparatus);GO:0005975(carbohydrate metabolic process);GO:0009834(plant-type secondary cell wall biogenesis);GO:0010417(glucuronoxylan biosynthetic process);GO:0015018(galactosylgalactosylxylosylprotein 3-beta-glucuronosyltransferase activity);GO:0016020(membrane);GO:0016021(integral component of membrane);GO:0016740(transferase activity);GO:0042285(xylo…	NA	K20869	EC:2.4.2.-	Probable beta-14-xylosyltransferase IRX9H	protein_coding	0.882126	0.565273	0.553969	1.93895	0.841757	1.79171	3.46652	0.873105	5.87294	0.513723	1.44968	1.04188	0.495897	0.216303	0.684612	0.26768	0.459826	1.15418	94	62	61	170	71	197	364	111	694	54	204	139	62	19	93	36	52	154
Zm00001d024939	chr10	95933122	95935711	-	Zm00001d024939	Zm00001d024939_T001;Zm00001d024939_T002;Zm00001d024939_T003;Zm00001d024939_T004;Zm00001d024939_T005;Zm00001d024939_T006;Zm00001d024939_T007	GO:0005737(cytoplasm);GO:0016020(membrane);GO:0016021(integral component of membrane);GO:0016868(intramolecular transferase activity, phosphotransferases);GO:0016868(intramolecular transferase activity, phosphotransferases)	NA	NA	NA	Phosphoglycerate mutase-like protein	protein_coding	1.08018	0.803513	0.0001	5.66466	6.84957	10.988	5.79776	2.26078	4.6974	1.39529	2.83176	2.41629	0.294418	0.297381	0.855646	0.422702	1.6096	0.303062	116	89	0	495	574	1203	609	286	557	146	398	320	37	26	116	58	181	41
Zm00001d024996	chr10	98385298	98386222	+	Zm00001d024996	Zm00001d024996_T001;Zm00001d024996_T002	GO:0004867(serine-type endopeptidase inhibitor activity);GO:0005576(extracellular region);GO:0008233(peptidase activity);GO:0010951(negative regulation of endopeptidase activity);GO:0010951(negative regulation of endopeptidase activity)	NA	NA	NA	Bowman-Birk type trypsin inhibitor	protein_coding	2.12491	2.32472	0.781494	67.5872	4.85929	18.427	87.5008	9.18057	5.05054	0.937643	2.27293	1.35399	8.77927	4.50563	10.1765	3.57396	4.94348	664.594	100	112	38	2588	180	888	4026	508	263	44	141	79	482	172	605	211	243	38631
Zm00001d025057	chr10	102026193	102028561	+	Zm00001d025057	Zm00001d025057_T001	GO:0004032(alditol:NADP+ 1-oxidoreductase activity);GO:0005829(cytosol);GO:0008106(alcohol dehydrogenase (NADP+) activity);GO:0016491(oxidoreductase activity);GO:0055114(oxidation-reduction process)	NA	K22374	EC:1.1.1.285	NAD(P)-linked oxidoreductase superfamily protein	protein_coding	0.423235	0.330643	0.173726	3.08736	3.60088	14.1005	44.5178	5.99382	4.16359	0.220909	0.49644	0.35787	2.77594	0.646777	1.68594	0.656845	1.20512	6.38008	36	29	15	214	240	1225	3695	598	389	19	56	38	275	45	181	70	107	670
Zm00001d025103	chr10	104219161	104224390	-	Zm00001d025103	Zm00001d025103_T001;Zm00001d025103_T002;Zm00001d025103_T003;Zm00001d025103_T004	GO:0005507(copper ion binding);GO:0008131(primary amine oxidase activity);GO:0009308(amine metabolic process);GO:0016491(oxidoreductase activity);GO:0046872(metal ion binding);GO:0048038(quinone binding);GO:0055114(oxidation-reduction process);GO:0055114(oxidation-reduction process)	00260(Glycine, serine and threonine metabolism);00350(Tyrosine metabolism);00360(Phenylalanine metabolism);00410(beta-Alanine metabolism);00950(Isoquinoline alkaloid biosynthesis);00960(Tropane, piperidine and pyridine alkaloid biosynthesis);00960(Tropane, piperidine and pyridine alkaloid biosynthesis)	K00276	EC:1.4.3.21	amine oxidase1	protein_coding	19.3138	4.88483	13.2704	1.71705	3.2396	1.12098	72.7353	23.2509	106.176	15.9699	47.2176	55.0091	0.240741	0.343393	1.68072	13.8613	24.9691	7.17263	3020	780	2129	221	401	181	11216	4306	18420	2459	9725	10712	45	44	335	2729	4088	1398
Zm00001d025285	chr10	112586640	112587826	-	Zm00001d025285	Zm00001d025285_T001	NA	NA	NA	NA		protein_coding	0.0001	0.0001	0.0001	0.0001	0.0001	0.0001	0.0001	0.0001	0.0001	0.15109	0.50478	1.61262	41.2591	10.8381	19.8595	2.45014	0.459174	1.62492	0	0	0	0	0	0	0	0	0	8	34	102	2450	447	1277	156	25	103
Zm00001d025310	chr10	113838140	113839870	-	Zm00001d025310	Zm00001d025310_T001	GO:0004842(ubiquitin-protein transferase activity);GO:0016567(protein ubiquitination)	NA	NA	NA	Putative RING zinc finger domain superfamily protein	protein_coding	3.61294	6.20279	9.00178	0.69803	0.795006	0.080753	1.36078	2.71967	1.02912	26.2358	20.1275	19.9873	0.990983	1.60537	2.72358	7.14783	5.09842	0.581893	333	584	851	53	58	8	124	297	106	2380	2443	2294	108	121	320	830	492	67
Zm00001d025401	chr10	117126777	117127673	-	abscisic acid stress ripening5	Zm00001d025401_T001	NA	NA	NA	NA	abscisic acid stress ripening5	protein_coding	0.291685	0.0001	0.080982	14.1591	4.30141	18.6964	50.5289	5.22206	23.362	7.6468	10.4003	11.071	121.305	115.863	73.4207	36.0714	18.3208	197.86	14	0	4	524	154	871	2247	279	1169	340	618	622	6425	4260	4212	2049	865	11119
Zm00001d025507	chr10	120795646	120808976	-	Zm00001d025507	Zm00001d025507_T001;Zm00001d025507_T002;Zm00001d025507_T003;Zm00001d025507_T004;Zm00001d025507_T005;Zm00001d025507_T006;Zm00001d025507_T007;Zm00001d025507_T008;Zm00001d025507_T009;Zm00001d025507_T010;Zm00001d025507_T011;Zm00001d025507_T012;Zm00001d025507_T013;Zm00001d025507_T014;Zm00001d025507_T015;Zm00001d025507_T016;Zm00001d025507_T017;Zm00001d025507_T018;Zm00001d025507_T019;Zm00001d025507_T020…	NA	NA	NA	NA		protein_coding	0.473205	0.0001	0.0001	0.0001	0.0001	0.0001	0.0295778	0.0001	0.0001	1.21354	2.62697	1.68711	4.87033	3.11686	5.37173	1.90012	1.62797	2.41556	181	0	0	0	0	0	12	0	0	461	1322	805	2181	972	2607	914	652	1150
Zm00001d025539	chr10	121727843	121731496	-	Zm00001d025539	Zm00001d025539_T001;Zm00001d025539_T002;Zm00001d025539_T003;Zm00001d025539_T004;Zm00001d025539_T005;Zm00001d025539_T006;Zm00001d025539_T007;Zm00001d025539_T008;Zm00001d025539_T009;Zm00001d025539_T010;Zm00001d025539_T011;Zm00001d025539_T012;Zm00001d025539_T013;Zm00001d025539_T014;Zm00001d025539_T015;Zm00001d025539_T016	GO:0006629(lipid metabolic process);GO:0009058(biosynthetic process);GO:0016844(strictosidine synthase activity);GO:0016844(strictosidine synthase activity)	NA	K12382	NA	saposin B domain-containing protein	protein_coding	0.0211055	1.70317	1.8705	1.50983	1.87124	3.45509	0.872596	1.87905	1.32045	1.26536	2.90899	2.24525	5.12775	2.67475	6.34851	4.74667	1.45227	4.35067	5	335	369	240	285	687	166	428	283	242	741	540	1161	421	1557	1151	296	1045
Zm00001d025580	chr10	122855595	122861043	-	somatic embryogenesis receptor-like kinase1	Zm00001d025580_T001	GO:0000166(nucleotide binding);GO:0004672(protein kinase activity);GO:0004674(protein serine/threonine kinase activity);GO:0004675(transmembrane receptor protein serine/threonine kinase activity);GO:0005102(signaling receptor binding);GO:0005515(protein binding);GO:0005524(ATP binding);GO:0005886(plasma membrane);GO:0006468(protein phosphorylation);GO:0007178(transmembrane receptor protein serine…	NA	K13418	2.7.11.1;EC:2.7.10.1	somatic embryogenesis receptor-like kinase1	protein_coding	0.510037	0.602499	0.618179	2.52377	3.10018	1.13831	5.90378	3.53268	12.6505	0.137047	0.280919	0.087876	7.53854	5.09025	3.56614	0.052862	0.076597	0.239754	69	83	85	278	329	158	781	561	1881	19	50	15	1187	557	608	9	11	41
Zm00001d025590	chr10	123321362	123328119	-	Zm00001d025590	Zm00001d025590_T001;Zm00001d025590_T002;Zm00001d025590_T003;Zm00001d025590_T004;Zm00001d025590_T005;Zm00001d025590_T006;Zm00001d025590_T007;Zm00001d025590_T008;Zm00001d025590_T009;Zm00001d025590_T010;Zm00001d025590_T011;Zm00001d025590_T012;Zm00001d025590_T013;Zm00001d025590_T014;Zm00001d025590_T015;Zm00001d025590_T016;Zm00001d025590_T017;Zm00001d025590_T018;Zm00001d025590_T019;Zm00001d025590_T020…	GO:0000166(nucleotide binding);GO:0005524(ATP binding);GO:0005886(plasma membrane);GO:0005887(integral component of plasma membrane);GO:0016020(membrane);GO:0016021(integral component of membrane);GO:0016887(ATPase activity);GO:0042626(ATPase-coupled transmembrane transporter activity);GO:0055085(transmembrane transport);GO:0055085(transmembrane transport)	NA	NA	NA	ABC transporter B family member 19	protein_coding	0.191073	0.939897	0.17451	0.133898	0.0501991	0.0614207	0.0763324	0.39716	0.0891345	3.27518	3.76067	2.76668	0.313498	0.250519	0.189403	0.618798	0.529556	5.04707	53	262	50	30	11	18	21	129	27	879	1352	941	101	56	66	213	152	1715
Zm00001d025661	chr10	125345461	125347269	+	Zm00001d025661	Zm00001d025661_T001	NA	NA	NA	NA		protein_coding	0.0001	0.0001	0.0001	0.0001	0.0001	0.0001	0.0001	0.0001	0.0001	0.0001	2.67065	1.35436	5.70899	5.46089	7.20572	1.74083	2.11019	3.00878	0	0	0	0	0	0	0	0	0	0	166	80	317	210	433	104	105	177
Zm00001d025747	chr10	128273093	128275437	-	Zm00001d025747	Zm00001d025747_T001;Zm00001d025747_T002;Zm00001d025747_T003	GO:0005829(cytosol);GO:0016311(dephosphorylation);GO:0016791(phosphatase activity);GO:0016791(phosphatase activity)	00630(Glyoxylate and dicarboxylate metabolism);00630(Glyoxylate and dicarboxylate metabolism)	K19269	3.1.3.48;EC:3.1.3.18	Phosphoglycolate phosphatase 1A chloroplastic	protein_coding	240.02	254.364	258.854	34.6637	40.8413	43.2288	41.054	154.509	40.9866	224.734	235.556	292.129	80.7726	55.5931	126.996	227.877	199.195	105.016	25152	27210	27843	2982	3384	4679	4245	19184	4768	23194	32527	38142	9947	4754	16936	30081	21864	13721
Zm00001d025984	chr10	135302916	135307138	+	glutamic dehydrogenase2	Zm00001d025984_T001;Zm00001d025984_T002;Zm00001d025984_T003	GO:0000166(nucleotide binding);GO:0004352(glutamate dehydrogenase (NAD+) activity);GO:0005507(copper ion binding);GO:0005524(ATP binding);GO:0005739(mitochondrion);GO:0005774(vacuolar membrane);GO:0006520(cellular amino acid metabolic process);GO:0006538(glutamate catabolic process);GO:0006995(cellular response to nitrogen starvation);GO:0008270(zinc ion binding);GO:0009409(response to cold);GO:0…	00220(Arginine biosynthesis);00250(Alanine, aspartate and glutamate metabolism);00910(Nitrogen metabolism);00910(Nitrogen metabolism)	K00261	EC:1.4.1.3	glutamic dehydrogenase2	protein_coding	4.32456	3.81351	6.55694	31.6247	62.957	54.1018	6.14359	4.82371	10.2437	8.77774	9.52409	7.10002	187.095	158.333	32.5775	0.279869	0.506184	1.36074	574	518	894	3444	6600	7411	805	759	1509	1147	1665	1174	29161	17130	5500	47	71	226
Zm00001d026017	chr10	136073204	136075724	-	MYB-related-transcription factor 111	Zm00001d026017_T001;Zm00001d026017_T002	GO:0003677(DNA binding);GO:0005634(nucleus);GO:0005634(nucleus)	NA	NA	NA	Protein REVEILLE 1	protein_coding	0.379436	1.16837	0.464868	3.03303	7.32388	1.9574	0.748412	1.92656	0.458142	0.670546	0.678238	0.791006	9.51496	13.7215	15.2472	0.204316	0.17222	0.243926	44	137	55	286	664	232	85	262	59	76	103	114	1280	1281	2221	30	21	35
Zm00001d026042	chr10	136799427	136804204	-	Zm00001d026042	Zm00001d026042_T001	GO:0005215(transporter activity);GO:0015211(purine nucleoside transmembrane transporter activity);GO:0015860(purine nucleoside transmembrane transport);GO:0016020(membrane);GO:0016021(integral component of membrane)	NA	NA	NA	Probable purine permease 11	protein_coding	0.947969	0.409827	1.1075	5.19632	5.26475	3.54655	22.688	5.12601	18.7909	1.26763	1.19643	1.95095	11.368	12.4568	26.4619	2.4046	5.39226	5.1555	128	57	154	575	561	494	3016	819	2810	169	213	328	1800	1369	4536	409	761	866
Zm00001d026084	chr10	138077230	138079896	+	Zm00001d026084	Zm00001d026084_T001	GO:0005515(protein binding)	NA	NA	NA	IQ-domain 23	protein_coding	5.29719	25.5935	10.5146	9.44557	20.7186	41.1031	3.77901	59.8597	3.72122	29.3125	30.2969	29.6665	15.2838	8.12099	10.9935	1.51202	2.89899	2.15315	593	2924	1208	868	1833	4750	418	7937	463	3231	4468	4137	2010	742	1566	214	340	301
Zm00001d026097	chr10	138393420	138400044	-	Zm00001d026097	Zm00001d026097_T001;Zm00001d026097_T002;Zm00001d026097_T003;Zm00001d026097_T004;Zm00001d026097_T005;Zm00001d026097_T006;Zm00001d026097_T008	GO:0046983(protein dimerization activity);GO:0046983(protein dimerization activity)	NA	NA	NA	Transcription factor bHLH157	protein_coding	2.54377	5.74695	4.20403	21.3187	22.5462	68.1405	9.18053	7.52434	12.3367	5.26756	4.80476	4.53848	12.7052	11.6344	12.2179	0.816698	0.581376	2.80115	606	1395	1026	4157	4235	16714	2153	2118	3254	1233	1506	1344	3547	2256	3694	246	146	831
Zm00001d026238	chr10	141680042	141685861	-	Zm00001d026238	Zm00001d026238_T001;Zm00001d026238_T002	GO:0006855(drug transmembrane transport);GO:0015238(GO_0015238);GO:0015297(antiporter activity);GO:0016020(membrane);GO:0016021(integral component of membrane);GO:0022857(transmembrane transporter activity);GO:0042908(xenobiotic transport);GO:0042910(xenobiotic transmembrane transporter activity);GO:0055085(transmembrane transport);GO:0055085(transmembrane transport)	NA	K03327	NA	Protein TRANSPARENT TESTA 12	protein_coding	0.0001	0.0001	0.0001	0.0001	0.114791	0.0001	0.195818	0.0001	0.0078214	0.0672383	0.686967	0.639552	2.49524	1.13518	3.38823	0.228756	0.475923	0.751519	0	0	0	0	26	0	55	0	3	19	259	227	835	264	1228	83	142	268
Zm00001d026282	chr10	142759486	142759971	+	Zm00001d026282	Zm00001d026282_T001	NA	NA	NA	NA	Bifunctional inhibitor/lipid-transfer protein/seed storage 2S albumin superfamily protein	protein_coding	186.427	52.9951	87.4418	151.431	188.72	355.539	91.796	109.285	22.1996	110.696	196.379	201.272	97.1112	31.9202	119.549	511.473	582.308	328.257	5203	1510	2505	3468	4163	10246	2528	3614	688	3043	7222	6998	3185	727	4246	17980	17020	11420
Zm00001d026295	chr10	143128213	143138549	+	Zm00001d026295	Zm00001d026295_T001;Zm00001d026295_T002;Zm00001d026295_T003;Zm00001d026295_T004;Zm00001d026295_T005	GO:0016020(membrane);GO:0016021(integral component of membrane);GO:0016021(integral component of membrane)	NA	NA	NA		protein_coding	0.0001	0.0218872	0.0001	0.0001	0.00947893	0.0001	0.0191729	0.0001	0.0529441	0.185036	0.437318	0.458555	1.9282	1.28322	1.04141	0.146469	0.117448	0.212149	0	12	0	0	4	0	10	0	30	92	292	288	1140	527	667	93	63	134
Zm00001d026310	chr10	143361789	143362886	+	Zm00001d026310	Zm00001d026310_T001	GO:0005515(protein binding);GO:0005739(mitochondrion)	NA	NA	NA	Pentatricopeptide repeat-containing protein mitochondrial	protein_coding	1.51897	1.41194	1.63553	5.05603	7.46838	7.30227	3.87606	2.8593	6.30103	0.274659	0.923341	0.805258	3.87063	1.67068	2.16037	0.281553	0.46705	0.530287	96	91	106	262	373	476	242	214	441	18	77	64	287	86	174	23	31	42
Zm00001d026343	chr10	143879828	143880241	+	Zm00001d026343	Zm00001d026343_T001	GO:0003735(structural constituent of ribosome);GO:0005840(ribosome);GO:0006412(translation);GO:0022625(cytosolic large ribosomal subunit)	03010(Ribosome)	K02901	NA	60S ribosomal protein L27	protein_coding	81.5085	101.23	41.6207	37.3756	45.4601	41.1362	167.933	104.015	91.0414	25.4494	62.2823	19.7267	13.1444	7.01538	23.1351	10.6679	29.8541	47.2521	1938	2457	1016	730	855	1010	3939	2930	2403	596	1951	585	368	137	700	320	744	1401
Zm00001d026452	chr10	146098952	146102717	+	Zm00001d026452	Zm00001d026452_T001	NA	NA	NA	NA	Filament-like plant protein 7	protein_coding	0.761616	0.320109	0.362948	2.6376	4.02758	4.46689	2.20862	1.09767	2.33175	1.85365	3.66852	3.48886	13.9079	8.23341	11.6123	6.7485	4.7958	9.15141	134	58	66	379	557	806	381	228	453	319	845	760	2856	1174	2582	1486	878	1994
Zm00001d026476	chr10	146668145	146675537	+	Zm00001d026476	Zm00001d026476_T001;Zm00001d026476_T002;Zm00001d026476_T003	GO:0000906(6,7-dimethyl-8-ribityllumazine synthase activity);GO:0005622(intracellular);GO:0009231(riboflavin biosynthetic process);GO:0009349(riboflavin synthase complex);GO:0016740(transferase activity);GO:0016740(transferase activity)	00740(Riboflavin metabolism);00740(Riboflavin metabolism)	K00794	EC:2.5.1.78	6%2C7-dimethyl-8-ribityllumazine synthase	protein_coding	20.7288	17.2112	7.57593	3.47355	4.99443	8.06504	11.552	13.6243	4.27384	20.5093	30.9427	27.1895	13.2691	6.43993	14.9193	16.8121	22.443	21.8365	1456	1235	547	201	278	586	801	1134	334	1420	2864	2380	1096	370	1334	1488	1651	1913
Zm00001d026505	chr10	147307733	147308281	+	Zm00001d026505	Zm00001d026505_T001	GO:0005515(protein binding)	NA	NA	NA		protein_coding	0.921706	1.45483	2.74483	0.776185	0.187318	1.66751	4.59657	1.28238	2.75371	3.26627	3.29822	3.04246	15.4328	4.44237	15.4522	11.0318	8.13068	4.82212	30	47	89	21	5	55	143	48	97	102	138	120	572	115	620	439	269	190
Zm00001d026563	chr10	148154979	148155515	-	Zm00001d026563	Zm00001d026563_T001	GO:0003677(DNA binding);GO:0003700(DNA-binding transcription factor activity);GO:0005634(nucleus);GO:0006351(transcription, DNA-templated);GO:0006355(regulation of transcription, DNA-templated)	NA	K09286	NA	Ethylene-responsive transcription factor 7	protein_coding	14.9069	13.6385	7.80091	13.6671	13.4321	19.894	11.897	7.03844	9.56078	9.96378	15.0783	19.7813	31.0803	22.8513	40.1094	78.4967	12.828	13.8385	460	430	247	346	328	634	362	258	328	303	613	760	1127	575	1574	3049	415	532
Zm00001d026606	chr10	148901809	148903746	+	Zm00001d026606	Zm00001d026606_T001;Zm00001d026606_T002	GO:0009507(chloroplast);GO:0016020(membrane);GO:0016021(integral component of membrane);GO:0016021(integral component of membrane)	NA	NA	NA	DNAJ heat shock N-terminal domain-containing protein	protein_coding	309.31	162.012	332.511	2.5496	1.65848	7.95726	172.037	123.692	219.381	180.006	195.379	222.176	10.0736	16.789	38.2697	1.4907	0.933067	9.5193	31523	16856	34786	214	134	838	17298	14936	24817	18068	26239	28213	1207	1396	4964	192	100	1210
Zm00001d026665	chr10	149623243	149624040	-	Zm00001d026665	Zm00001d026665_T001	NA	NA	NA	NA		protein_coding	19.4402	21.0475	18.4592	84.976	114.157	116.447	27.8587	18.2387	20.5589	2.46545	4.55317	3.60166	11.8776	7.03293	11.2615	1.3082	1.74842	7.11857	891	985	869	3196	4134	5510	1260	991	1046	112	275	206	640	263	657	76	84	407
Zm00001d026721	chr4	3810795	3811461	+	Zm00001d026721	Zm00001d026721_T001	NA	NA	NA	NA		lincRNA	0.0001	0.0001	0.0001	0.0001	0.0001	0.0001	0.0001	0.0001	0.0001	5.00143	7.23081	6.16542	0.70891	1.47244	4.43547	11.2044	12.9511	8.39436	0	0	0	0	0	0	0	0	0	189	365	295	32	46	217	541	520	401
Zm00001d026859	chr4	93312857	93314303	-	Zm00001d026859	Zm00001d026859_T001	NA	NA	NA	NA		lincRNA	5.95822	2.94189	6.97395	17.7951	22.6833	47.459	31.3045	16.736	38.2941	5.91154	0.830973	5.08842	457.186	306.701	109.846	0.0001	0.0001	3.21424	138	70	165	337	413	1129	712	457	979	135	26	146	12370	5760	3219	0	0	93
Zm00001d027239	chr1	196942	199159	-	Zm00001d027239	Zm00001d027239_T001;Zm00001d027239_T002;Zm00001d027239_T003;Zm00001d027239_T004	NA	NA	NA	NA		protein_coding	7.30497	4.22301	8.75362	16.5017	16.0404	30.7948	12.6995	17.9029	11.0065	0.403502	2.95177	2.7338	6.46484	3.89164	7.06734	4.20302	1.75425	2.05754	933	552	1146	1727	1616	4052	1597	2703	1557	51	497	436	968	406	1147	676	235	328
Zm00001d027291	chr1	1942161	1942595	-	Zm00001d027291	Zm00001d027291_T001	NA	NA	NA	NA	extensin-like protein	protein_coding	7582.77	7604.48	6459.95	214.406	36.8001	645.681	19.174	5830.35	0.0001	3381.68	4159.37	4051.91	71.3919	54.4438	10.7891	31.8144	64.3487	51.2482	189387	193886	165619	4395	727	16654	473	172532	0	83184	136895	126095	2096	1110	343	1001	1684	1596
Zm00001d027332	chr1	3095308	3095604	-	Zm00001d027332	Zm00001d027332_T001	GO:0006869(lipid transport)	NA	NA	NA	Nonspecific lipid-transfer protein	protein_coding	371.195	278.364	234.86	175.904	116.995	54.3378	56.9066	242.249	103.285	649.27	1752.11	1445.11	195.651	57.3253	831.661	1758.75	3755.03	5192.61	6330	4846	4112	2462	1577	957	958	4895	1955	10905	39372	30705	3921	798	18048	37781	67069	110397
Zm00001d027454	chr1	5603127	5604467	+	GRMZM2G055704	Zm00001d027454_T001;Zm00001d027454_T002	GO:0030001(metal ion transport);GO:0046872(metal ion binding);GO:0046872(metal ion binding)	NA	NA	NA	Heavy metal transport/detoxification superfamily protein	protein_coding	8.78983	19.0702	8.21828	15.1731	17.5462	16.3581	13.6603	42.5885	12.1669	8.55306	25.3369	18.1553	8.0235	1.98465	12.0713	82.0047	94.0737	155.443	551	1220	529	781	869	1059	845	3161	846	528	2092	1418	591	102	963	6472	6173	12140
Zm00001d027532	chr1	7558685	7564087	+	Zm00001d027532	Zm00001d027532_T001;Zm00001d027532_T002;Zm00001d027532_T003;Zm00001d027532_T004	NA	NA	NA	NA		protein_coding	0.335795	1.25724	0.361035	6.41319	5.51196	6.46106	0.0817871	0.958025	0.0329387	0.305921	0.171639	0.182297	22.3468	13.5871	11.8998	3.46443	1.62505	25.3105	97	368	106	1504	1245	1907	24	326	12	87	66	66	7499	3166	4325	1247	487	9010
Zm00001d027619	chr1	9119707	9122688	+	beta amylase2	Zm00001d027619_T001;Zm00001d027619_T002;Zm00001d027619_T003;Zm00001d027619_T004;Zm00001d027619_T005	GO:0000272(polysaccharide catabolic process);GO:0005975(carbohydrate metabolic process);GO:0008152(metabolic process);GO:0016161(beta-amylase activity);GO:0016787(hydrolase activity);GO:0016798(hydrolase activity, acting on glycosyl bonds);GO:0102229(amylopectin maltohydrolase activity);GO:0102229(amylopectin maltohydrolase activity)	00500(Starch and sucrose metabolism);00500(Starch and sucrose metabolism)	K01177	EC:3.2.1.2	beta amylase2	protein_coding	14.0032	19.65	25.457	170.643	193.74	396.169	40.8033	16.0991	22.3425	24.0806	28.3072	38.4505	89.5501	80.7294	194.807	366.156	488.432	721.602	1854	2655	3459	18535	20265	54144	5328	2525	3283	3139	4937	6341	13927	8715	32810	61045	67706	119065
Zm00001d027652	chr1	10150836	10152891	-	TIP1-1	Zm00001d027652_T001	GO:0005773(vacuole);GO:0005774(vacuolar membrane);GO:0006833(water transport);GO:0007033(vacuole organization);GO:0009705(plant-type vacuole membrane);GO:0009826(unidimensional cell growth);GO:0015250(water channel activity);GO:0015267(channel activity);GO:0016020(membrane);GO:0016021(integral component of membrane);GO:0048366(leaf development);GO:0055085(transmembrane transport)	NA	K09873	NA	Aquaporin TIP1-1	protein_coding	243.805	342.549	120.232	2346.49	3221.6	3203.12	638.616	871.858	334.634	186.826	235.761	253.726	1729.04	1007.18	912.347	1257.89	2421.48	5067.95	16043	23009	8121	126716	167537	217649	41457	67970	24440	12107	20443	20802	133692	54053	76395	104265	166884	415750
Zm00001d027682	chr1	11066056	11069126	-	Zm00001d027682	Zm00001d027682_T001;Zm00001d027682_T002;Zm00001d027682_T003	GO:0005886(plasma membrane);GO:0016020(membrane);GO:0016021(integral component of membrane);GO:0022857(transmembrane transporter activity);GO:0055085(transmembrane transport);GO:0055085(transmembrane transport)	NA	NA	NA	WAT1-related protein	protein_coding	0.060111	0.0001	0.0001	0.661684	0.561167	0.502168	0.322282	0.660358	1.69132	0.060926	0.651348	1.09273	0.226873	0.0001	0.260789	4.56682	3.88206	17.2757	8	0	0	68	56	65	40	98	236	8	108	171	34	0	42	719	508	2690
Zm00001d027738	chr1	12393671	12398258	+	Zm00001d027738	Zm00001d027738_T001	GO:0031047(gene silencing by RNA)	NA	NA	NA	XS domain containing protein expressed	protein_coding	0.0001	0.0001	0.0001	0.0001	0.0001	0.0001	0.0001	0.0001	0.0001	0.71193	0.964741	1.0588	3.93405	1.78438	2.74391	1.92429	1.14745	0.197196	0	0	0	0	0	0	0	0	0	59	106	110	385	121	291	202	100	21
Zm00001d027810	chr1	14247874	14250263	-	Zm00001d027810	Zm00001d027810_T001	GO:0010143(cutin biosynthetic process);GO:0016020(membrane);GO:0016021(integral component of membrane);GO:0016311(dephosphorylation);GO:0016740(transferase activity);GO:0016746(transferase activity, transferring acyl groups);GO:0016791(phosphatase activity);GO:0090447(glycerol-3-phosphate 2-O-acyltransferase activity)	NA	NA	NA	Glycerol-3-phosphate acyltransferase 5	protein_coding	0.580543	24.0173	5.12846	0.048773	0.292385	0.075325	0.172848	102.497	0.136067	18.4813	7.84648	6.48709	1.62418	1.72308	3.21084	0.379714	1.08933	0.162467	55	2303	495	4	22	8	17	11408	15	1710	972	760	180	133	384	45	108	20
Zm00001d027813	chr1	14321650	14323311	+	Zm00001d027813	Zm00001d027813_T002;Zm00001d027813_T003	GO:0000028(ribosomal small subunit assembly);GO:0003735(structural constituent of ribosome);GO:0005840(ribosome);GO:0006412(translation);GO:0022627(cytosolic small ribosomal subunit);GO:0030490(maturation of SSU-rRNA);GO:0030490(maturation of SSU-rRNA)	NA	NA	NA	40S ribosomal protein S28	protein_coding	29.7376	35.6059	16.4345	10.2254	11.6202	16.5996	35.4985	37.2814	23.1649	12.3678	26.8151	9.97321	6.49728	4.05899	7.77358	4.15797	8.86851	15.7908	1880	2297	1066	531	581	1084	2213	2791	1625	770	2233	786	483	210	625	331	588	1244
Zm00001d027876	chr1	16227533	16235054	+	Zm00001d027876	Zm00001d027876_T001;Zm00001d027876_T002;Zm00001d027876_T003;Zm00001d027876_T004;Zm00001d027876_T005;Zm00001d027876_T006	GO:0006107(oxaloacetate metabolic process);GO:0006528(asparagine metabolic process);GO:0006541(glutamine metabolic process);GO:0006807(nitrogen compound metabolic process);GO:0050152(omega-amidase activity);GO:0050152(omega-amidase activity)	00250(Alanine, aspartate and glutamate metabolism);00250(Alanine, aspartate and glutamate metabolism)	K13566	EC:3.5.1.3	Omega-amidase chloroplastic	protein_coding	5.26578	4.63377	4.24209	1.63483	1.24775	1.62897	2.31906	2.77934	2.25746	13.9632	14.9263	15.5529	6.8145	4.89422	7.10221	6.71751	6.6222	10.4537	1483	1332	1226	378	278	474	645	928	706	3873	5539	5458	2256	1124	2546	2384	1954	3670
Zm00001d027892	chr1	16843024	16848595	+	Zm00001d027892	Zm00001d027892_T001	GO:0004672(protein kinase activity);GO:0005524(ATP binding);GO:0006468(protein phosphorylation);GO:0016301(kinase activity);GO:0016310(phosphorylation)	NA	NA	NA	root-specific kinase 1	protein_coding	0.970434	1.08568	1.2649	10.8013	13.8707	26.2849	6.40403	3.57924	4.40524	1.58241	2.64337	3.29324	0.912404	0.334773	0.822674	6.08129	23.3326	14.8879	102	116	136	927	1146	2837	661	444	511	163	364	429	113	29	110	801	2554	1940
Zm00001d027916	chr1	17533781	17553169	+	Zm00001d027916	Zm00001d027916_T002;Zm00001d027916_T003;Zm00001d027916_T005;Zm00001d027916_T006;Zm00001d027916_T007;Zm00001d027916_T008;Zm00001d027916_T009;Zm00001d027916_T011;Zm00001d027916_T013;Zm00001d027916_T014	GO:0007033(vacuole organization);GO:0036092(phosphatidylinositol-3-phosphate biosynthetic process);GO:0042578(phosphoric ester hydrolase activity);GO:0042578(phosphoric ester hydrolase activity)	00562(Inositol phosphate metabolism);00562(Inositol phosphate metabolism)	K22913	EC:3.1.3.-	Phosphoinositide phosphatase SAC2	protein_coding	0.695826	0.642598	0.759333	1.40792	1.93507	1.22165	1.67807	0.753759	2.06621	0.60306	1.18891	1.17064	3.43448	2.0957	4.64598	7.77377	4.66677	6.46507	209	197	234	348	458	379	497	268	688	179	470	437	1209	514	1772	2933	1465	2414
Zm00001d028043	chr1	21388224	21388658	-	Zm00001d028043	Zm00001d028043_T001	NA	NA	NA	NA	MFP1 attachment factor 1	protein_coding	12.5449	17.2716	21.7409	2.32606	5.78121	9.95909	6.62962	21.4752	6.21585	7.18645	11.289	6.14231	2.07112	0.933993	3.02879	28.1682	51.312	35.609	314	441	558	48	115	257	164	636	173	177	372	192	61	20	97	887	1343	1109
Zm00001d028167	chr1	25047706	25050015	-	Zm00001d028167	Zm00001d028167_T001	GO:0016020(membrane);GO:0016021(integral component of membrane);GO:0046872(metal ion binding);GO:0055114(oxidation-reduction process)	NA	NA	NA	Cytochrome b561 and DOMON domain-containing protein	protein_coding	0.595289	0.70977	0.0001	2.77377	3.44699	10.45	4.59731	0.308964	0.82926	0.266135	0.09202	0.115453	2.09128	1.33416	0.837801	1.60529	2.97005	16.2394	56	68	0	213	255	1007	423	35	86	25	12	14	230	102	100	189	291	1888
Zm00001d028174	chr1	25495853	25498760	+	Zm00001d028174	Zm00001d028174_T001	NA	NA	NA	NA		protein_coding	5.90815	4.40102	5.66523	9.01515	13.8122	14.814	9.30555	7.37073	8.62606	0.597591	0.606053	1.08458	1.85646	2.57986	3.20842	0.742917	0.149358	0.085668	407	310	401	509	751	1053	632	601	659	41	55	93	151	145	281	65	11	8
Zm00001d028180	chr1	25632515	25636718	+	low phytic acid1	Zm00001d028180_T001;Zm00001d028180_T002;Zm00001d028180_T003;Zm00001d028180_T004;Zm00001d028180_T005;Zm00001d028180_T006;Zm00001d028180_T007;Zm00001d028180_T008;Zm00001d028180_T009;Zm00001d028180_T010;Zm00001d028180_T011;Zm00001d028180_T012	GO:0004512(inositol-3-phosphate synthase activity);GO:0005737(cytoplasm);GO:0006021(inositol biosynthetic process);GO:0006629(lipid metabolic process);GO:0008654(phospholipid biosynthetic process);GO:0016853(isomerase activity);GO:0016853(isomerase activity)	00562(Inositol phosphate metabolism);00562(Inositol phosphate metabolism)	K01858	EC:5.5.1.4	low phytic acid1	protein_coding	5.11804	10.343	14.1512	68.3198	141.773	90.9539	9.79886	4.17437	2.24898	3.94097	8.05238	4.0912	36.2123	7.32703	50.5948	826.473	696.146	1755.98	794	1636	2250	8677	17341	14535	1497	768	388	602	1643	790	6587	926	9965	161103	112827	338763
Zm00001d028331	chr1	31049530	31051714	+	Zm00001d028331	Zm00001d028331_T001	GO:0004553(hydrolase activity, hydrolyzing O-glycosyl compounds);GO:0005975(carbohydrate metabolic process);GO:0016787(hydrolase activity);GO:0046658(anchored component of plasma membrane)	NA	NA	NA	Glucan endo-13-beta-glucosidase 7	protein_coding	13.5218	6.78703	13.1757	0.60911	1.05488	0.913528	13.4484	3.64149	17.142	9.5878	20.0104	18.0073	2.16417	1.81863	5.79732	24.2545	38.4485	21.0175	1371	703	1371	51	85	96	1345	438	1929	957	2673	2274	258	151	748	3097	4082	2656
Zm00001d028355	chr1	31794590	31806747	-	Zm00001d028355	Zm00001d028355_T001;Zm00001d028355_T002;Zm00001d028355_T003;Zm00001d028355_T004;Zm00001d028355_T005;Zm00001d028355_T006;Zm00001d028355_T007;Zm00001d028355_T008	GO:0006857(oligopeptide transport);GO:0015333(peptide:proton symporter activity);GO:0016020(membrane);GO:0016021(integral component of membrane);GO:0022857(transmembrane transporter activity);GO:0035672(oligopeptide transmembrane transport);GO:0035673(oligopeptide transmembrane transporter activity);GO:0055085(transmembrane transport);GO:1902600(proton transmembrane transport);GO:1904680(peptide …	NA	NA	NA	Protein NRT1/ PTR FAMILY 8.3	protein_coding	1.74524	1.65172	2.51653	2.47438	4.12767	4.32665	2.30264	2.45583	2.5627	0.0001	0.147768	0.116174	0.466573	0.34421	0.541745	0.242931	0.131821	0.380794	465	449	688	541	869	1187	604	774	757	0	52	40	148	77	186	83	37	127
Zm00001d028361	chr1	32068552	32072460	-	C2H2-transcription factor 225	Zm00001d028361_T001	GO:0003676(nucleic acid binding);GO:0003700(DNA-binding transcription factor activity);GO:0005634(nucleus);GO:0006355(regulation of transcription, DNA-templated)	NA	NA	NA	Protein SHOOT GRAVITROPISM 5	protein_coding	0.625703	2.39922	0.325131	0.895011	2.49806	1.61805	2.1985	4.00553	2.92871	0.435478	0.476091	0.949042	6.98972	1.75615	4.76495	0.330061	0.286797	1.29357	56	219	30	66	176	149	194	423	290	39	56	106	732	128	540	38	27	144
Zm00001d028369	chr1	32354777	32360308	+	Zm00001d028369	Zm00001d028369_T001	NA	NA	NA	NA	hydroxyproline-rich glycoprotein family protein	protein_coding	3.46454	1.74147	1.57918	6.98494	11.8529	8.13616	4.77137	2.49091	3.50075	3.62888	12.6176	9.39883	19.0803	16.6251	21.9076	11.2732	26.061	21.4766	491	252	230	813	1328	1191	668	419	551	507	2357	1660	3178	1922	3951	2013	3868	3795
Zm00001d028408	chr1	33789050	33790182	+	heat shock protein26	Zm00001d028408_T001	NA	04141(Protein processing in endoplasmic reticulum)	K13993	NA	heat shock protein26	protein_coding	0.57021	0.061941	0.287171	939.656	893.295	3060.86	19.2811	4.89902	5.85883	0.895637	2.2293	0.456758	266.014	17.8079	154.183	2.92039	4.21791	527.799	34	4	18	45696	41834	187294	1128	344	386	53	175	34	18523	861	11627	218	262	38991
Zm00001d028409	chr1	33800139	33804188	-	Zm00001d028409	Zm00001d028409_T001	GO:0005524(ATP binding);GO:0005829(cytosol);GO:0006457(protein folding);GO:0006458('de novo' protein folding);GO:0009570(chloroplast stroma);GO:0009941(chloroplast envelope);GO:0042026(protein refolding);GO:0051082(unfolded protein binding)	NA	NA	NA	Chaperonin 60 subunit beta 4 chloroplastic	protein_coding	76.7759	97.989	99.6365	3.11944	4.9335	5.88441	21.2135	61.035	29.9124	57.1051	88.976	75.4714	9.93121	17.0121	19.1607	0.807734	0.728341	1.69031	10827	14106	14423	362	550	857	2952	10198	4682	7931	16534	13261	1646	1957	3439	144	108	298
Zm00001d028428	chr1	34690471	34704954	-	Zm00001d028428	Zm00001d028428_T001;Zm00001d028428_T002	GO:0005509(calcium ion binding);GO:0005509(calcium ion binding)	NA	NA	NA	Calcium-binding EF-hand family protein	protein_coding	13.0087	3.8309	4.99674	9.52647	3.4385	7.37988	14.9092	3.68165	9.4212	4.13466	12.8447	8.32893	1.30512	0.973081	5.69708	26.945	30.377	56.9456	1322	398	521	795	277	775	1495	444	1063	414	1720	1055	156	81	737	3448	3233	7212
Zm00001d028456	chr1	35502775	35505397	+	Zm00001d028456	Zm00001d028456_T001	GO:0008104(protein localization);GO:0015031(protein transport)	NA	NA	NA	Regulator of Vps4 activity in the MVB pathway protein	protein_coding	5.1546	3.55794	2.98947	21.2795	30.4921	36.1138	11.0706	10.3569	15.4755	2.31505	4.20926	2.84873	11.6637	9.75126	14.6638	3.35759	2.35628	5.17795	652	460	388	2209	3047	4716	1381	1552	2172	289	702	449	1733	1006	2360	535	313	817
Zm00001d028502	chr1	37260628	37261694	+	Zm00001d028502	Zm00001d028502_T001	GO:0003824(catalytic activity);GO:0004553(hydrolase activity, hydrolyzing O-glycosyl compounds);GO:0004557(alpha-galactosidase activity);GO:0005975(carbohydrate metabolic process);GO:0008152(metabolic process);GO:0009505(plant-type cell wall);GO:0016787(hydrolase activity);GO:0016798(hydrolase activity, acting on glycosyl bonds);GO:0052692(raffinose alpha-galactosidase activity)	NA	NA	NA	Alpha-galactosidase 1	protein_coding	0.0001	0.0001	0.0001	0.0001	0.0001	0.0001	0.0001	0.0001	0.0001	0.0001	0.0001	0.533309	18.8348	9.94034	9.12956	2.21583	1.43255	7.72501	0	0	0	0	0	0	0	0	0	0	0	19	626	230	329	79	43	273
Zm00001d028555	chr1	38997819	38998295	+	Zm00001d028555	Zm00001d028555_T001	GO:0000302(response to reactive oxygen species);GO:0006457(protein folding);GO:0009408(response to heat);GO:0009651(response to salt stress);GO:0042542(response to hydrogen peroxide);GO:0043621(protein self-association);GO:0051082(unfolded protein binding);GO:0051259(protein complex oligomerization)	04141(Protein processing in endoplasmic reticulum)	K13993	NA	17.4 kDa class I heat shock protein 3	protein_coding	4.66424	2.72997	6.03771	33.5281	54.4804	101.158	35.8566	9.78023	27.2207	4.22788	7.63987	5.97264	35.8776	19.9179	22.7834	87.1107	91.7245	346.931	128	77	170	754	1180	2862	969	318	828	115	276	204	1155	445	795	3006	2632	11847
Zm00001d028574	chr1	39490113	39492146	-	Zm00001d028574	Zm00001d028574_T001	GO:0003824(catalytic activity);GO:0004721(phosphoprotein phosphatase activity);GO:0004722(protein serine/threonine phosphatase activity);GO:0004724(magnesium-dependent protein serine/threonine phosphatase activity);GO:0005634(nucleus);GO:0005829(cytosol);GO:0006470(protein dephosphorylation);GO:0009738(abscisic acid-activated signaling pathway);GO:0009845(seed germination);GO:0016787(hydrolase ac…	04016(MAPK signaling pathway - plant);04075(Plant hormone signal transduction)	K14497	EC:3.1.3.16	Protein phosphatase 2C 37	protein_coding	1.77435	1.6536	1.65956	2.56433	12.9359	9.1151	1.45741	0.648422	0.67432	6.75861	8.48444	6.41445	37.6003	8.73468	40.4148	27.9316	56.1402	20.7896	182	173	175	216	1048	965	148	79	77	682	1146	819	4526	730	5269	3605	6024	2655
Zm00001d028613	chr1	40787502	40790508	-	Zm00001d028613	Zm00001d028613_T001	GO:0000166(nucleotide binding);GO:0004672(protein kinase activity);GO:0004674(protein serine/threonine kinase activity);GO:0005524(ATP binding);GO:0006468(protein phosphorylation);GO:0016301(kinase activity);GO:0016310(phosphorylation)	NA	NA	NA	Protein kinase APK1A chloroplastic	protein_coding	4.06021	4.80298	2.79638	11.8663	13.2685	16.2076	14.576	7.95983	16.8937	4.69961	12.6904	11.3235	33.325	16.5329	40.91	27.4302	27.5351	29.3879	389	470	275	933	1005	1603	1378	904	1796	444	1602	1352	3751	1292	4986	3310	2763	3509
Zm00001d028651	chr1	41801401	41802524	-	wusl1032	Zm00001d028651_T001	GO:0016301(kinase activity);GO:0016310(phosphorylation)	NA	NA	NA	Cysteine-rich repeat secretory protein 55	protein_coding	5.54827	15.1544	3.10543	12.4617	13.3715	26.5972	6.06409	35.9821	1.70568	0.0001	0.098078	0.120786	1.96754	4.13118	0.65661	0.134139	0.109097	1.02629	322	896	185	592	612	1590	347	2468	110	0	8	9	134	196	49	10	7	75
Zm00001d028665	chr1	42291247	42292050	-	Zm00001d028665	Zm00001d028665_T001	NA	NA	NA	NA		protein_coding	28.4223	22.9217	19.6116	8.63742	7.67446	8.894	42.8518	22.8173	44.7252	10.6674	29.8065	14.2253	4.72216	2.66689	4.11039	2.65625	6.14756	11.8369	1313	1081	930	328	281	424	1952	1248	2292	485	1814	819	257	101	242	155	298	682
Zm00001d028696	chr1	43359353	43361346	-	Zm00001d028696	Zm00001d028696_T001;Zm00001d028696_T002;Zm00001d028696_T003	NA	NA	NA	NA	Expressed protein; protein	protein_coding	2.02708	4.63649	3.13583	2.00193	3.7345	3.51956	2.93674	5.66604	1.75888	0.841121	2.42089	1.55143	0.398471	0.0001	0.0001	0.665177	0.585925	0.260791	183	424	288	147	265	325	260	602	175	76	286	174	43	0	0	76	56	30
Zm00001d028711	chr1	43908553	43911257	-	MAP kinase3	Zm00001d028711_T001;Zm00001d028711_T002;Zm00001d028711_T003;Zm00001d028711_T004;Zm00001d028711_T005;Zm00001d028711_T006	GO:0000165(MAPK cascade);GO:0000166(nucleotide binding);GO:0004672(protein kinase activity);GO:0004674(protein serine/threonine kinase activity);GO:0004707(MAP kinase activity);GO:0005524(ATP binding);GO:0005622(intracellular);GO:0005634(nucleus);GO:0005737(cytoplasm);GO:0006468(protein phosphorylation);GO:0010468(regulation of gene expression);GO:0016301(kinase activity);GO:0016310(phosphorylati…	04016(MAPK signaling pathway - plant);04016(MAPK signaling pathway - plant)	K20536	EC:2.7.11.24	MAP kinase3	protein_coding	6.04116	3.54585	3.66064	13.4341	26.6976	17.088	15.5448	5.82576	36.8583	0.101361	0.414239	0.248409	2.46021	2.38778	4.11464	0.556048	0.707182	1.56278	570	341	355	1040	1989	1662	1446	652	3855	10	53	30	273	184	494	67	70	184
Zm00001d028793	chr1	46498733	46499395	-	Zm00001d028793	Zm00001d028793_T001	GO:0004864(protein phosphatase inhibitor activity);GO:0005634(nucleus);GO:0005737(cytoplasm);GO:0009738(abscisic acid-activated signaling pathway);GO:0010427(abscisic acid binding);GO:0032515(negative regulation of phosphoprotein phosphatase activity);GO:0038023(signaling receptor activity);GO:0080163(regulation of protein serine/threonine phosphatase activity)	04016(MAPK signaling pathway - plant);04075(Plant hormone signal transduction)	K14496	NA	Abscisic acid receptor PYL5	protein_coding	51.7034	85.7829	60.0542	21.7941	11.8335	20.3384	86.4812	50.2579	144.538	30.7598	81.6682	84.4513	6.42985	9.02066	2.74879	9.01146	10.3135	27.0628	1969	3334	2347	681	357	800	3248	2267	6108	1154	4097	4006	288	281	134	433	412	1285
Zm00001d028906	chr1	50505948	50506710	+	Zm00001d028906	Zm00001d028906_T001;Zm00001d028906_T002	GO:0016020(membrane);GO:0016021(integral component of membrane);GO:0016021(integral component of membrane)	NA	NA	NA		protein_coding	2.6087	0.104909	1.90053	30.9179	1.03749	1.4629	0.0913025	0.258387	0.226769	0.240376	7.76291	5.20105	0.0001	0.0001	0.0001	2.53058	3.23534	0.273628	109	5	82	1060	35	64	4	13	11	10	427	271	0	0	0	134	142	15
Zm00001d028941	chr1	52310307	52310813	+	Zm00001d028941	Zm00001d028941_T001	GO:0051091(positive regulation of DNA-binding transcription factor activity)	NA	NA	NA	VQ motif family protein expressed	protein_coding	3.61528	3.56617	3.25734	2.5767	2.89418	3.41081	19.7645	5.03798	5.35211	2.80762	7.03549	4.75427	0.539841	0.40882	0.53341	2.11651	0.348968	0.813748	106	106	98	62	67	103	568	174	173	81	270	173	19	10	20	78	11	30
Zm00001d028992	chr1	53883358	53885907	-	Zm00001d028992	Zm00001d028992_T001	GO:0005623(cell);GO:0045454(cell redox homeostasis)	NA	NA	NA	Thioredoxin-like 1-1 chloroplastic	protein_coding	2.00105	5.60198	2.50739	44.4013	80.7913	82.622	10.6813	15.3268	7.52322	0.889052	1.12762	1.35139	34.7635	17.2049	30.7532	94.45	69.4477	91.7749	178	508	229	3237	5672	7579	937	1613	742	78	132	150	3629	1247	3477	10569	6461	10164
Zm00001d029040	chr1	55709486	55715009	+	Zm00001d029040	Zm00001d029040_T001;Zm00001d029040_T002;Zm00001d029040_T003	GO:0000166(nucleotide binding);GO:0004672(protein kinase activity);GO:0005515(protein binding);GO:0005524(ATP binding);GO:0006468(protein phosphorylation);GO:0016020(membrane);GO:0016021(integral component of membrane);GO:0016301(kinase activity);GO:0016310(phosphorylation);GO:0016310(phosphorylation)	NA	NA	NA	Probable inactive receptor kinase	protein_coding	3.17876	4.02358	2.19639	1.14351	1.58584	0.650314	1.29798	3.95196	0.641741	5.18528	8.02568	6.61404	3.51677	2.24746	3.8908	3.15693	8.08008	5.64183	492	636	350	146	195	104	198	725	111	790	1636	1274	639	284	766	615	1309	1089
Zm00001d029074	chr1	57250815	57254236	+	lesion22	Zm00001d029074_T001;Zm00001d029074_T002;Zm00001d029074_T003	GO:0004853(uroporphyrinogen decarboxylase activity);GO:0005829(cytosol);GO:0006779(porphyrin-containing compound biosynthetic process);GO:0006782(protoporphyrinogen IX biosynthetic process);GO:0006783(heme biosynthetic process);GO:0009507(chloroplast);GO:0009536(plastid);GO:0015995(chlorophyll biosynthetic process);GO:0016829(lyase activity);GO:0016831(carboxy-lyase activity);GO:0016831(carboxy-l…	00860(Porphyrin and chlorophyll metabolism);00860(Porphyrin and chlorophyll metabolism)	K01599	EC:4.1.1.37	Uroporphyrinogen decarboxylase 2 chloroplastic	protein_coding	106.728	149.568	77.2831	18.0412	18.1312	22.5338	23.4191	114.086	29.5088	49.0465	54.7251	32.6279	9.26606	5.20203	8.51191	4.15902	5.21661	4.8762	16345	23381	12149	2268	2196	3564	3539	20700	5017	7398	11044	6227	1669	651	1661	803	838	932
Zm00001d029197	chr1	61898636	61901310	+	Zm00001d029197	Zm00001d029197_T001	GO:0005515(protein binding);GO:0016020(membrane);GO:0016021(integral component of membrane)	NA	NA	NA	IQ-domain 11	protein_coding	5.82652	4.9919	3.32591	2.12537	2.39484	2.35837	2.30701	4.63991	2.6142	13.3374	18.1219	22.2302	5.63104	4.58597	7.60471	9.0384	3.75204	10.3712	602	527	353	181	196	252	236	568	300	1357	2467	2862	684	387	1000	1177	406	1336
Zm00001d029233	chr1	63272548	63273003	+	Zm00001d029233	Zm00001d029233_T001	NA	NA	NA	NA		protein_coding	1.81451	0.280365	0.012899	3.38736	5.42669	6.8488	2.92625	1.34448	5.3749	9.08102	15.8611	20.9114	31.1459	25.1741	59.1299	19.9169	29.8972	5.27824	48	8	1	73	113	186	76	42	157	235	548	683	959	538	1971	657	820	173
Zm00001d029237	chr1	63318026	63324928	+	Zm00001d029237	Zm00001d029237_T001;Zm00001d029237_T002;Zm00001d029237_T003;Zm00001d029237_T004;Zm00001d029237_T005;Zm00001d029237_T006;Zm00001d029237_T007;Zm00001d029237_T008;Zm00001d029237_T009;Zm00001d029237_T011	GO:0003824(catalytic activity);GO:0005829(cytosol);GO:0006520(cellular amino acid metabolic process);GO:0006545(glycine biosynthetic process);GO:0006567(threonine catabolic process);GO:0008732(L-allo-threonine aldolase activity);GO:0016829(lyase activity);GO:0016829(lyase activity)	NA	NA	NA	Probable low-specificity L-threonine aldolase 1	protein_coding	0.0001	0.0127708	0.0001	0.0187476	0.0340393	0.0001	0.0259148	0.0001	0.0001	1.21155	0.848899	1.04888	9.60737	5.02291	7.0493	1.55029	1.04428	3.05291	0	4	0	5	8	0	8	0	0	346	324	379	3268	1186	2598	566	317	1102
Zm00001d029246	chr1	63586080	63588689	+	Zm00001d029246	Zm00001d029246_T001	GO:0005515(protein binding);GO:0016020(membrane);GO:0016021(integral component of membrane)	NA	NA	NA	ARM repeat superfamily protein	protein_coding	0.475393	0.312029	0.579398	2.13444	4.76443	4.26477	2.7939	0.21879	2.95434	1.04037	4.08497	4.00668	12.7738	8.7087	8.86273	3.38134	5.87288	9.82272	72	48	90	263	565	660	414	39	492	154	807	749	2250	1065	1691	639	922	1836
Zm00001d029254	chr1	63859845	63864152	-	Zm00001d029254	Zm00001d029254_T001;Zm00001d029254_T002	GO:0005351(carbohydrate:proton symporter activity);GO:0005355(glucose transmembrane transporter activity);GO:0005887(integral component of plasma membrane);GO:0008643(carbohydrate transport);GO:0008645(hexose transmembrane transport);GO:0016020(membrane);GO:0016021(integral component of membrane);GO:0022857(transmembrane transporter activity);GO:0046323(glucose import);GO:0055085(transmembrane tr…	NA	NA	NA	Solute carrier family 2%2C facilitated glucose transporter member 8	protein_coding	12.9931	12.0279	10.8491	1.20563	2.11936	1.71901	13.2379	7.06908	16.6238	12.0671	5.51434	5.14572	0.209857	0.0001	0.138839	0.376159	0.312352	0.0996184	1532	1448	1313	117	199	211	1541	988	2176	1402	857	756	30	0	21	57	39	15
Zm00001d029257	chr1	63916533	63917166	+	Zm00001d029257	Zm00001d029257_T001	NA	NA	NA	NA		protein_coding	22.073	27.2268	22.9237	43.4668	69.6414	107.477	24.8375	23.8296	34.6602	3.71261	11.7304	10.1758	39.2135	28.1328	23.329	2.01063	0.836843	1.32234	804	1012	857	1299	2004	4041	893	1028	1401	134	563	462	1678	836	1081	93	32	61
Zm00001d029285	chr1	64841576	64846984	+	pyruvate dehydrogenase (lipoamide) kinase1	Zm00001d029285_T001;Zm00001d029285_T002;Zm00001d029285_T003;Zm00001d029285_T004;Zm00001d029285_T005;Zm00001d029285_T006;Zm00001d029285_T007;Zm00001d029285_T008;Zm00001d029285_T009;Zm00001d029285_T010	GO:0000166(nucleotide binding);GO:0004672(protein kinase activity);GO:0004674(protein serine/threonine kinase activity);GO:0004740(pyruvate dehydrogenase (acetyl-transferring) kinase activity);GO:0005524(ATP binding);GO:0005739(mitochondrion);GO:0005759(mitochondrial matrix);GO:0006468(protein phosphorylation);GO:0016301(kinase activity);GO:0016310(phosphorylation);GO:0016740(transferase activity…	NA	K00898	EC:2.7.11.2	pyruvate dehydrogenase (lipoamide) kinase1	protein_coding	13.0706	15.8339	16.4816	5.78677	7.78964	8.2014	14.0963	14.715	15.5008	1.63145	1.32283	1.72394	0.383677	0.716901	1.12721	0.841713	1.40454	2.11242	1842	2276	2383	671	867	1193	1959	2455	2424	228	246	303	64	83	202	150	208	372
Zm00001d029325	chr1	65991013	65992879	-	Zm00001d029325	Zm00001d029325_T001;Zm00001d029325_T002	GO:0003676(nucleic acid binding);GO:0003723(RNA binding);GO:0003729(mRNA binding);GO:0005634(nucleus);GO:0009507(chloroplast);GO:0009535(chloroplast thylakoid membrane);GO:0019013(viral nucleocapsid);GO:0051252(regulation of RNA metabolic process);GO:1901259(chloroplast rRNA processing);GO:1990904(ribonucleoprotein complex);GO:1990904(ribonucleoprotein complex)	NA	NA	NA	RNA-binding protein CP29B chloroplastic	protein_coding	197.443	246.941	138.118	18.0685	13.9159	21.184	39.9589	182.301	46.2043	153.455	168.965	123.836	8.23197	4.20527	12.4587	6.48675	13.7863	34.5234	13673	17456	9818	1027	763	1516	2731	14957	3552	10466	15419	10685	670	238	1099	567	1001	2982
Zm00001d029350	chr1	66934947	66936356	+	Zm00001d029350	Zm00001d029350_T001	GO:0003824(catalytic activity);GO:0006633(fatty acid biosynthetic process);GO:0016020(membrane);GO:0016021(integral component of membrane);GO:0016740(transferase activity);GO:0016746(transferase activity, transferring acyl groups);GO:0016747(transferase activity, transferring acyl groups other than amino-acyl groups)	NA	NA	NA	3-ketoacyl-CoA synthase	protein_coding	0.510729	0.396082	0.673233	14.401	6.63122	4.96972	0.660234	5.65908	1.19164	0.380776	0.469686	0.348829	1.15963	1.27637	3.46276	0.176369	0.364018	0.38864	42	33	56	957	425	416	53	543	108	31	51	36	111	85	357	18	31	40
Zm00001d029366	chr1	67604993	67609141	+	Zm00001d029366	Zm00001d029366_T001;Zm00001d029366_T002;Zm00001d029366_T003	GO:0005515(protein binding);GO:0005515(protein binding)	NA	NA	NA	Transducin/WD40 repeat-like superfamily protein	protein_coding	4.03113	4.7495	4.58081	26.5274	65.9937	39.6772	1.53257	2.28042	1.62492	1.23206	1.0371	2.17507	15.6774	6.64175	35.3636	3.2942	5.56289	18.7916	547	657	639	2949	7063	5549	207	367	245	165	186	368	2495	735	6094	563	790	3173
Zm00001d029373	chr1	67969019	67973213	+	Zm00001d029373	Zm00001d029373_T001	GO:0004180(carboxypeptidase activity);GO:0004185(serine-type carboxypeptidase activity);GO:0005773(vacuole);GO:0006508(proteolysis);GO:0008233(peptidase activity);GO:0016787(hydrolase activity);GO:0051603(proteolysis involved in cellular protein catabolic process)	NA	NA	NA	Serine carboxypeptidase-like 40	protein_coding	0.639891	1.01609	1.22426	1.40157	5.13999	3.98365	2.45748	1.26017	1.98838	1.29203	4.46664	2.10888	37.1416	24.8604	24.0279	3.41361	7.36419	0.960942	60	97	117	108	379	383	226	139	206	119	548	245	4063	1888	2846	401	718	112
Zm00001d029378	chr1	68244474	68250776	+	Zm00001d029378	Zm00001d029378_T001;Zm00001d029378_T002;Zm00001d029378_T003;Zm00001d029378_T004;Zm00001d029378_T005;Zm00001d029378_T006;Zm00001d029378_T007;Zm00001d029378_T008;Zm00001d029378_T009;Zm00001d029378_T010;Zm00001d029378_T011;Zm00001d029378_T012;Zm00001d029378_T013;Zm00001d029378_T014;Zm00001d029378_T015;Zm00001d029378_T016	GO:0006355(regulation of transcription, DNA-templated);GO:0007623(circadian rhythm);GO:0016020(membrane);GO:0016021(integral component of membrane);GO:0016021(integral component of membrane)	NA	NA	NA	Protein LNK1	protein_coding	1.3321	1.64254	2.18985	12.078	17.6085	18.5934	13.1704	3.23315	17.7005	1.23295	1.254	1.33067	9.59001	2.36519	4.84079	35.584	25.6308	17.7513	401	505	675	2968	4163	5740	3887	1148	5873	365	496	497	3372	581	1844	13396	8024	6618
Zm00001d029386	chr1	68537971	68540134	+	Zm00001d029386	Zm00001d029386_T001;Zm00001d029386_T002;Zm00001d029386_T003;Zm00001d029386_T004;Zm00001d029386_T005;Zm00001d029386_T006;Zm00001d029386_T007	GO:0003824(catalytic activity);GO:0016787(hydrolase activity);GO:0016787(hydrolase activity)	NA	NA	NA	alpha/beta-Hydrolases superfamily protein	protein_coding	0.0540525	0.0001	0.402274	3.11566	1.23426	11.6005	0.0770788	0.113527	0.270972	0.5805	0.0001	0.119439	1.81392	0.87035	2.7927	0.458644	0.820061	9.53493	6	0	41	252	97	1174	8	14	30	56	0	15	210	70	349	58	85	1165
Zm00001d029387	chr1	68548473	68551087	-	Zm00001d029387	Zm00001d029387_T001;Zm00001d029387_T002;Zm00001d029387_T003;Zm00001d029387_T004;Zm00001d029387_T005	GO:0004197(cysteine-type endopeptidase activity);GO:0006508(proteolysis);GO:0006508(proteolysis)	NA	K22684	EC:3.4.22.-	LOL3	protein_coding	8.51867	1.04607	1.29412	6.46822	10.671	12.9355	2.47391	2.18699	8.62562	8.81677	33.0179	62.6479	2.96275	2.03609	4.20615	41.488	39.6424	1.63057	1146	144	179	714	1135	1795	329	349	1287	1167	5845	10484	469	224	721	7021	5578	274
Zm00001d029460	chr1	71820234	71820986	+	Zm00001d029460	Zm00001d029460_T001	GO:0016036(cellular response to phosphate starvation);GO:0070417(cellular response to cold)	NA	NA	NA	Ids4-like protein	protein_coding	0.851489	3.26877	0.871569	0.0001	0.437417	0.081827	15.2654	6.45781	4.13123	8.17969	48.9263	89.8657	10.0252	2.38358	6.10989	103.723	261.198	149.921	37	145	39	0	15	4	652	331	199	349	2788	4842	510	85	337	5650	11829	8082
Zm00001d029507	chr1	73753509	73757673	+	Zm00001d029507	Zm00001d029507_T001;Zm00001d029507_T002;Zm00001d029507_T003	NA	NA	NA	NA		protein_coding	0.0001	0.0001	0.0001	0.0001	0.735762	0.647013	0.151888	0.0360351	0.02198	0.100737	0.31024	0.292837	2.34385	2.24393	1.74884	0.0660563	0.365838	0.563241	0	0	0	0	121	139	32	9	6	21	85	76	572	381	463	18	80	147
Zm00001d029527	chr1	74787607	74790957	-	Zm00001d029527	Zm00001d029527_T001;Zm00001d029527_T002;Zm00001d029527_T003;Zm00001d029527_T004;Zm00001d029527_T005	GO:0010005(cortical microtubule, transverse to long axis);GO:0043622(cortical microtubule organization);GO:0043622(cortical microtubule organization)	NA	K18635	NA	Protein SPIRAL1	protein_coding	34.8267	33.6524	25.3671	24.5044	44.5547	44.5728	58.5272	46.5028	35.1069	11.1298	27.3448	21.6669	6.91765	3.78515	8.67346	10.3975	19.3688	7.95629	2237	2207	1675	1294	2264	2957	3710	3538	2504	706	2315	1736	523	199	709	842	1304	637
Zm00001d029551	chr1	75803417	75804837	-	Zm00001d029551	Zm00001d029551_T001;Zm00001d029551_T002	NA	NA	NA	NA		protein_coding	0.0001	0.0001	0.0001	0.0001	0.0001	0.0001	0.0001	0.0001	0.0001	18.6587	11.3939	8.85421	31.4628	24.0506	38.1004	7.19777	7.92527	10.1096	0	0	0	0	0	0	0	0	0	707	578	425	1423	755	1866	349	320	485
Zm00001d029583	chr1	77839833	77840687	+	Zm00001d029583	Zm00001d029583_T001	NA	NA	NA	NA	Polygalacturonase inhibitor 1	protein_coding	9.67031	20.4401	4.30762	32.4174	30.353	35.9917	5.00659	54.0388	11.9377	1.55814	6.72833	2.41418	11.9915	7.89307	19.2183	0.683907	0.755898	10.3784	475	1025	218	1307	1178	1825	243	3144	651	76	436	148	692	317	1201	43	39	636
Zm00001d029594	chr1	78239819	78241044	-	allene oxide cyclase1	Zm00001d029594_T001	GO:0009507(chloroplast);GO:0009695(jasmonic acid biosynthetic process);GO:0016853(isomerase activity);GO:0046423(allene-oxide cyclase activity)	00592(alpha-Linolenic acid metabolism)	K10525	EC:5.3.99.6	allene oxide cyclase1	protein_coding	3.05848	2.59102	2.63241	3.39694	5.77475	5.94041	3.98299	8.9315	3.04883	5.79211	18.3357	12.479	3.19184	1.29226	3.04522	11.6032	30.2184	14.1144	197	171	174	180	294	395	253	682	218	368	1556	1001	242	68	250	941	2038	1133
Zm00001d029778	chr1	86529694	86530424	+	metallothionein2	Zm00001d029778_T001	GO:0008270(zinc ion binding);GO:0046872(metal ion binding)	NA	NA	NA	metallothionein2	protein_coding	2.6863	0.506317	0.349093	50.0248	92.7759	180.314	5.76731	1.73423	10.042	0.813169	0.504812	1.17741	74.5643	32.4492	45.8325	5.37448	5.71176	40.9886	113	22	16	1724	3078	7816	239	87	468	34	28	62	3678	1111	2448	285	252	2145
Zm00001d029869	chr1	91144009	91144932	-	Zm00001d029869	Zm00001d029869_T001	NA	NA	NA	NA	zinc finger (C2H2 type) family protein	protein_coding	7.90769	8.62399	12.0026	0.0001	0.228316	0.068144	0.121257	3.92295	0.579417	5.77328	11.0961	11.0735	1.5202	2.18681	2.64343	10.9154	7.63229	5.50481	420	468	654	0	10	4	7	247	35	302	776	732	95	95	179	730	425	365
Zm00001d029884	chr1	91990667	91991467	+	AP2-EREBP-transcription factor 44	Zm00001d029884_T001	GO:0003677(DNA binding);GO:0003700(DNA-binding transcription factor activity);GO:0005634(nucleus);GO:0006351(transcription, DNA-templated);GO:0006355(regulation of transcription, DNA-templated)	NA	NA	NA	Ethylene-responsive transcription factor ERF035	protein_coding	1.16779	2.42991	1.16419	0.049808	0.771421	1.49074	0.962974	1.50364	0.798204	5.00134	15.0118	19.0286	4.91082	1.21634	3.16986	15.2463	23.1182	22.298	54	115	55	2	29	71	44	82	41	227	910	1091	266	46	186	884	1114	1279
Zm00001d029997	chr1	98382117	98384521	+	Zm00001d029997	Zm00001d029997_T001;Zm00001d029997_T002;Zm00001d029997_T003	GO:0005759(mitochondrial matrix);GO:0006457(protein folding);GO:0009507(chloroplast);GO:0009536(plastid);GO:0046872(metal ion binding);GO:0051082(unfolded protein binding);GO:0051085(chaperone cofactor-dependent protein refolding);GO:0051087(chaperone binding);GO:0051087(chaperone binding)	NA	K04078	NA	chloroplast chaperonin 10	protein_coding	35.4609	55.3244	35.2435	3.02433	1.14357	12.8915	14.4549	49.5486	3.04436	189.289	141.581	122.718	48.3947	23.0565	58.4661	61.9862	57.3765	113.498	2179	3470	2223	153	56	818	877	3607	208	11454	11463	9394	3495	1156	4571	4798	3693	8694
Zm00001d030172	chr1	110342608	110348109	-	Zm00001d030172	Zm00001d030172_T001;Zm00001d030172_T002;Zm00001d030172_T003;Zm00001d030172_T004;Zm00001d030172_T005;Zm00001d030172_T006;Zm00001d030172_T007;Zm00001d030172_T008	GO:0004180(carboxypeptidase activity);GO:0004185(serine-type carboxypeptidase activity);GO:0006508(proteolysis);GO:0016747(transferase activity, transferring acyl groups other than amino-acyl groups);GO:0019748(secondary metabolic process);GO:0019748(secondary metabolic process)	NA	K16296	EC:3.4.16.-	Serine carboxypeptidase-like 19	protein_coding	2.78261	1.37043	2.57103	22.606	19.7226	25.985	19.0595	5.05131	21.1606	1.01071	0.461932	1.01729	4.17055	3.91581	3.98852	1.00289	0.394491	6.48305	838	421	796	5577	4686	8065	5653	1801	7060	302	184	382	1475	962	1528	382	127	2433
Zm00001d030213	chr1	113434606	113438057	+	Zm00001d030213	Zm00001d030213_T001	GO:0004672(protein kinase activity);GO:0004674(protein serine/threonine kinase activity);GO:0005524(ATP binding);GO:0005886(plasma membrane);GO:0006468(protein phosphorylation);GO:0016020(membrane);GO:0016021(integral component of membrane);GO:0016301(kinase activity);GO:0016310(phosphorylation)	NA	NA	NA	Protein kinase	protein_coding	5.26558	3.94499	4.52416	6.70269	5.85281	7.01147	7.75154	5.68672	8.931	0.825846	5.61876	2.84764	1.03896	0.036886	1.89995	0.622944	1.21788	0.94374	656	502	579	686	577	902	953	840	1235	102	923	442	153	4	302	98	159	147
Zm00001d030526	chr1	141705734	141709496	+	Zm00001d030526	Zm00001d030526_T001;Zm00001d030526_T002;Zm00001d030526_T003;Zm00001d030526_T004;Zm00001d030526_T005;Zm00001d030526_T006;Zm00001d030526_T007	GO:0005200(structural constituent of cytoskeleton);GO:0005515(protein binding);GO:0005737(cytoplasm);GO:0019901(protein kinase binding);GO:0019901(protein kinase binding)	NA	NA	NA	Outer arm dynein light chain 1 protein	protein_coding	15.9493	6.61201	11.4842	17.1063	22.4003	29.3499	39.0942	33.38	44.8294	16.7539	33.5962	39.7867	72.8328	37.9117	97.5763	173.445	163.913	137.758	3133	1326	2316	2758	3477	5951	7572	7764	9768	3240	8689	9731	16799	6071	24371	42882	33696	33709
Zm00001d030995	chr1	172452608	172457478	+	bZIP-transcription factor 111	Zm00001d030995_T001;Zm00001d030995_T002;Zm00001d030995_T003;Zm00001d030995_T004;Zm00001d030995_T005;Zm00001d030995_T006;Zm00001d030995_T007;Zm00001d030995_T009;Zm00001d030995_T010;Zm00001d030995_T012	GO:0003700(DNA-binding transcription factor activity);GO:0006355(regulation of transcription, DNA-templated);GO:0006355(regulation of transcription, DNA-templated)	NA	NA	NA	Basic leucine zipper 25	protein_coding	12.2262	11.1811	23.8378	2.14775	2.86022	1.87894	112.194	38.87	132.034	21.8819	19.8526	25.3742	6.89489	1.83581	5.35786	0.774029	0.598774	0.59413	3371	3149	6747	488	626	538	30504	12694	40387	5942	7213	8715	2235	415	1882	273	176	208
Zm00001d031063	chr1	175263789	175269072	-	Zm00001d031063	Zm00001d031063_T001	NA	NA	NA	NA	Retrovirus-related Pol polyprotein LINE-1	protein_coding	0.444696	0.493383	0.808693	0.648163	0.319799	0.755713	0.741227	0.468493	0.926052	0.339176	0.683292	0.48369	2.09051	1.99895	1.91042	2.37997	1.47934	2.35001	57	65	107	69	33	100	94	72	132	43	116	78	315	209	312	384	199	375
Zm00001d031086	chr1	176495793	176506822	+	nine-cis-epoxycarotenoid dioxygenase2	Zm00001d031086_T001	GO:0009507(chloroplast);GO:0009570(chloroplast stroma);GO:0010436(carotenoid dioxygenase activity);GO:0016121(carotene catabolic process);GO:0016702(oxidoreductase activity, acting on single donors with incorporation of molecular oxygen, incorporation of two atoms of oxygen);GO:0045549(9-cis-epoxycarotenoid dioxygenase activity);GO:0046872(metal ion binding);GO:0051213(dioxygenase activity);GO:00…	NA	NA	NA	nine-cis-epoxycarotenoid dioxygenase2	protein_coding	0.130628	0.0001	0.073822	0.0001	0.139582	0.0001	0.174319	0.0001	0.268485	0.155263	0.225477	0.344067	1.4855	1.29467	3.65043	0.606975	0.953653	3.53674	13	0	8	0	11	0	17	0	30	16	30	43	172	104	457	76	99	433
Zm00001d031127	chr1	178717020	178719023	-	Zm00001d031127	Zm00001d031127_T001;Zm00001d031127_T002	GO:0016702(oxidoreductase activity, acting on single donors with incorporation of molecular oxygen, incorporation of two atoms of oxygen);GO:0055114(oxidation-reduction process);GO:0055114(oxidation-reduction process)	00430(Taurine and hypotaurine metabolism);00430(Taurine and hypotaurine metabolism)	K10712	EC:1.13.11.19	Cupin%2C RmlC-type	protein_coding	1.15675	1.1577	0.248853	6.23129	5.63639	22.7693	1.33895	1.99439	1.7547	0.0001	0.250433	0.0001	3.35023	2.86864	1.41045	0.110188	0.0613855	0.0001	98	100	22	433	377	1985	112	201	165	0	29	0	333	198	152	12	6	0
Zm00001d031179	chr1	181314460	181317451	-	ras-related protein RHN1	Zm00001d031179_T001	GO:0000139(Golgi membrane);GO:0003924(GTPase activity);GO:0005525(GTP binding);GO:0005768(endosome);GO:0005886(plasma membrane);GO:0006886(intracellular protein transport);GO:0010256(endomembrane system organization);GO:0012505(endomembrane system);GO:0030139(endocytic vesicle);GO:0032482(Rab protein signal transduction);GO:0032586(protein storage vacuole membrane)	04144(Endocytosis);04145(Phagosome)	K07889	NA	ras-related protein RHN1	protein_coding	13.5935	9.71185	12.7485	17.8975	24.2539	36.3174	31.6983	14.1853	30.7437	0.599872	1.91127	1.4911	6.0465	2.95817	6.59514	1.82327	1.91983	8.35871	873	637	841	943	1231	2408	2008	1079	2191	38	162	120	457	155	539	148	130	669
Zm00001d031201	chr1	181968293	181971430	-	Zm00001d031201	Zm00001d031201_T001	GO:0000166(nucleotide binding);GO:0004672(protein kinase activity);GO:0004674(protein serine/threonine kinase activity);GO:0005515(protein binding);GO:0005524(ATP binding);GO:0005886(plasma membrane);GO:0006468(protein phosphorylation);GO:0009506(plasmodesma);GO:0016020(membrane);GO:0016021(integral component of membrane);GO:0016301(kinase activity);GO:0016310(phosphorylation);GO:0016740(transfer…	NA	NA	NA	Leucine-rich repeat transmembrane protein kinase family protein	protein_coding	3.63179	1.24799	2.56935	9.4476	15.6039	11.1887	5.85311	1.83156	10.0092	0.641772	1.2304	1.33103	2.45851	1.71748	3.23921	1.59985	1.65562	0.506635	635	223	461	1355	2155	2019	1009	380	1942	111	284	290	505	245	721	353	303	111
Zm00001d031264	chr1	184285253	184286332	+	Zm00001d031264	Zm00001d031264_T001	GO:0016702(oxidoreductase activity, acting on single donors with incorporation of molecular oxygen, incorporation of two atoms of oxygen);GO:0055114(oxidation-reduction process)	NA	NA	NA	Cupin%2C RmlC-type	protein_coding	0.143652	0.093276	0.418197	0.850746	0.668462	1.18798	2.7994	0.236595	1.6849	0.807248	0.363906	0.613924	2.01925	1.80562	3.10342	2.0165	1.30164	13.2371	8	5	23	36	28	64	143	15	97	41	25	40	123	76	204	131	71	851
Zm00001d031300	chr1	185589046	185592963	+	Zm00001d031300	Zm00001d031300_T001;Zm00001d031300_T002;Zm00001d031300_T003	GO:0003824(catalytic activity);GO:0010325(raffinose family oligosaccharide biosynthetic process);GO:0016740(transferase activity);GO:0016757(transferase activity, transferring glycosyl groups);GO:0047274(galactinol-sucrose galactosyltransferase activity);GO:0047274(galactinol-sucrose galactosyltransferase activity)	00052(Galactose metabolism);00052(Galactose metabolism)	K06617	EC:2.4.1.82	Probable galactinol--sucrose galactosyltransferase 1	protein_coding	1.70704	4.40496	1.22937	84.9938	180.896	29.3599	4.59193	1.71453	6.5179	42.3702	61.6314	38.6086	4582.34	2862.84	2349.02	36.2608	10.5624	3.43533	274	720	203	11159	22871	4851	725	326	1159	6676	12993	7697	861359	373517	478176	7307	1771	687
Zm00001d031303	chr1	185700379	185710906	+	Zm00001d031303	Zm00001d031303_T001;Zm00001d031303_T002;Zm00001d031303_T003;Zm00001d031303_T004;Zm00001d031303_T005;Zm00001d031303_T006;Zm00001d031303_T007;Zm00001d031303_T008;Zm00001d031303_T009	GO:0003824(catalytic activity);GO:0010325(raffinose family oligosaccharide biosynthetic process);GO:0016740(transferase activity);GO:0016757(transferase activity, transferring glycosyl groups);GO:0016757(transferase activity, transferring glycosyl groups)	00052(Galactose metabolism);00052(Galactose metabolism)	K06617	EC:2.4.1.82	Probable galactinol--sucrose galactosyltransferase 1	protein_coding	0.847211	1.94573	0.911299	69.4905	144.175	16.4889	2.97903	0.666357	5.33645	26.8908	35.1504	23.3249	1974.83	1459.34	1136.5	23.8308	6.13333	1.58785	182	426	201	12185	24343	3640	630	171	1269	5660	9897	6209	495667	254236	308912	6414	1375	425
Zm00001d031430	chr1	189862644	189867555	-	Zm00001d031430	Zm00001d031430_T001;Zm00001d031430_T002;Zm00001d031430_T003;Zm00001d031430_T004;Zm00001d031430_T005;Zm00001d031430_T006;Zm00001d031430_T007	GO:0006999(nuclear pore organization);GO:0017056(structural constituent of nuclear pore);GO:0044611(nuclear pore inner ring);GO:0044611(nuclear pore inner ring)	NA	NA	NA		protein_coding	1.2454	1.30298	1.3252	0.191275	0.0780915	0.121146	0.322958	1.85625	0.299174	3.53371	13.9626	10.152	0.772992	1.50473	1.30226	5.81533	4.16062	2.21779	351	374	383	45	18	36	90	618	94	978	5155	3544	256	347	466	2056	1222	778
Zm00001d031458	chr1	190927319	190930337	-	Zm00001d031458	Zm00001d031458_T001;Zm00001d031458_T002;Zm00001d031458_T003;Zm00001d031458_T004;Zm00001d031458_T005	GO:0003677(DNA binding);GO:0046983(protein dimerization activity);GO:0046983(protein dimerization activity)	NA	NA	NA	hAT transposon superfamily protein	protein_coding	0.0001	0.0001	0.0315962	0.127929	0.130065	0.189132	0.0896664	0.0297733	0.142158	0.510043	1.06891	0.765124	4.17805	3.19399	3.74291	0.544094	0.490795	0.74211	0	0	5	15	15	27	13	5	22	69	193	131	672	356	651	94	71	127
Zm00001d031503	chr1	192155541	192156325	+	Zm00001d031503	Zm00001d031503_T001	GO:0005524(ATP binding);GO:0005739(mitochondrion);GO:0005829(cytosol);GO:0006457(protein folding);GO:0006458('de novo' protein folding);GO:0007005(mitochondrion organization);GO:0045041(protein import into mitochondrial intermembrane space);GO:0051082(unfolded protein binding)	NA	NA	NA	Chaperonin 60 subunit alpha 2 chloroplastic	protein_coding	132.804	128.778	94.9071	8.80194	6.67019	16.5408	14.1706	79.5567	10.6631	29.0249	28.3067	22.5189	3.18764	3.11678	6.39071	0.987022	1.92116	6.04185	4484	4439	3290	244	178	577	472	3183	400	966	1260	948	127	86	275	42	68	255
Zm00001d031556	chr1	194157336	194158112	+	Zm00001d031556	Zm00001d031556_T001	GO:0016020(membrane);GO:0016021(integral component of membrane)	NA	NA	NA	AIR12	protein_coding	0.270779	2.11295	1.65494	11.0136	4.08704	6.95055	2.03966	4.16643	1.86113	43.8041	84.0061	47.5375	23.0833	14.1445	18.8105	8.19087	12.1012	14.7363	13	97	76	404	145	321	90	221	93	1925	4939	2643	1211	515	1068	461	566	820
Zm00001d031568	chr1	194606659	194607393	+	Zm00001d031568	Zm00001d031568_T001	NA	NA	NA	NA		protein_coding	11.9976	9.18761	16.1094	68.2957	60.5866	93.8536	48.9057	25.4836	58.5566	2.36079	1.80854	2.65011	38.5372	11.4467	13.9218	1.26709	0.312208	3.4219	507	396	698	2366	2021	4091	2037	1275	2743	99	101	140	1912	395	748	68	14	181
Zm00001d031653	chr1	197494482	197499476	+	Zm00001d031653	Zm00001d031653_T001;Zm00001d031653_T002;Zm00001d031653_T003;Zm00001d031653_T004;Zm00001d031653_T005;Zm00001d031653_T006;Zm00001d031653_T007;Zm00001d031653_T008	GO:0006629(lipid metabolic process);GO:0008081(phosphoric diester hydrolase activity);GO:0046475(glycerophospholipid catabolic process);GO:0046475(glycerophospholipid catabolic process)	NA	NA	NA	Glycerophosphodiester phosphodiesterase GDPD2	protein_coding	5.44883	8.3204	7.98218	23.9154	22.6413	25.8515	19.3004	10.6577	20.7263	14.0524	24.1745	29.2495	101.45	36.6095	40.1023	68.7331	100.495	72.2829	694	1081	1044	2495	2274	3393	2421	1607	2924	1760	4048	4632	15145	3795	6484	10998	13371	11449
Zm00001d031666	chr1	198113791	198116973	-	Zm00001d031666	Zm00001d031666_T001;Zm00001d031666_T002	GO:0016491(oxidoreductase activity);GO:0055114(oxidation-reduction process);GO:0055114(oxidation-reduction process)	NA	NA	NA	Probable aldo-keto reductase 4	protein_coding	8.36936	5.13128	3.27314	7.92896	4.94253	2.23958	59.2797	4.89364	9.19855	5.86443	7.77822	3.74457	52.8124	20.5168	24.5109	2.25942	3.31092	7.35323	685	429	275	532	320	190	4780	474	835	473	839	382	5071	1369	2550	233	284	750
Zm00001d031700	chr1	198833249	198838390	-	Zm00001d031700	Zm00001d031700_T001;Zm00001d031700_T002;Zm00001d031700_T003;Zm00001d031700_T004	NA	NA	NA	NA		protein_coding	2.35731	1.74016	1.97569	3.57485	4.09674	3.29586	4.53084	2.14892	4.71981	1.36224	1.38012	0.963243	0.50514	0.46264	0.877864	0.180715	0.178956	0.341856	662	499	569	823	908	955	1253	715	1470	377	511	338	168	108	314	64	53	121
Zm00001d031729	chr1	199827411	199829671	+	Zm00001d031729	Zm00001d031729_T001	NA	NA	NA	NA	TraB family protein	protein_coding	43.7497	38.8693	44.9704	6.80675	8.53581	7.66913	8.10641	22.9202	11.2506	33.2074	32.9088	32.6188	1.91857	3.58024	5.10291	2.3182	1.51374	1.87548	3565	3233	3761	456	550	646	652	2213	1018	2665	3534	3312	184	238	530	238	130	191
Zm00001d031736	chr1	200197812	200199489	-	HSF-transcription factor 8	Zm00001d031736_T001	GO:0000978(RNA polymerase II cis-regulatory region sequence-specific DNA binding);GO:0003677(DNA binding);GO:0003700(DNA-binding transcription factor activity);GO:0005634(nucleus);GO:0006355(regulation of transcription, DNA-templated);GO:0034605(cellular response to heat);GO:0042025(host cell nucleus);GO:0043565(sequence-specific DNA binding);GO:0043618(regulation of transcription from RNA polyme…	NA	NA	NA	Heat shock factor protein 7	protein_coding	0.0001	0.0001	0.0001	0.0001	0.0001	0.345714	0.85575	0.0001	0.344558	0.0001	0.146448	0.108113	3.72793	2.41002	3.59258	9.24476	20.6547	87.6035	0	0	0	0	0	33	77	0	35	0	18	13	399	179	417	1061	1971	9946
Zm00001d031808	chr1	202464156	202467819	+	Zm00001d031808	Zm00001d031808_T001;Zm00001d031808_T002	NA	NA	NA	NA	NAD(P)-binding Rossmann-fold superfamily protein	protein_coding	12.7844	11.9648	5.17912	4.30306	9.51746	4.02281	2.84167	7.607	2.70125	14.3657	22.6287	27.2266	107.457	72.7151	75.8895	9.75088	22.764	24.1811	1338	1278	557	370	787	435	294	943	314	1481	3120	3549	13210	6205	10103	1285	2495	3154
Zm00001d031826	chr1	203010395	203011279	-	Zm00001d031826	Zm00001d031826_T001	GO:0003680(AT DNA binding);GO:0003700(DNA-binding transcription factor activity);GO:0005634(nucleus);GO:0006355(regulation of transcription, DNA-templated)	NA	NA	NA	AT-hook motif nuclear-localized protein 17	protein_coding	3.36948	6.0146	3.58925	7.14478	5.739	6.93782	2.44157	4.74184	2.10681	0.037567	0.228596	0.7036	5.25482	1.53649	1.87307	0.162265	0.180877	0.986663	172	312	188	298	231	365	123	286	119	2	16	45	314	64	122	11	10	63
Zm00001d031957	chr1	207955121	207958827	-	Zm00001d031957	Zm00001d031957_T001	GO:0000470(maturation of LSU-rRNA);GO:0003723(RNA binding);GO:0003735(structural constituent of ribosome);GO:0005840(ribosome);GO:0006412(translation);GO:0015934(large ribosomal subunit);GO:0022625(cytosolic large ribosomal subunit)	03010(Ribosome)	K02865	NA	60S ribosomal protein L10a-1	protein_coding	33.9399	42.1511	27.5872	58.1544	57.0008	75.2288	102.023	62.1378	54.8398	1.30852	4.42556	3.59595	12.8365	16.7171	11.5141	2.75687	4.30977	24.4566	2197	2785	1833	3089	2916	5027	6514	4764	3939	84	378	290	977	883	949	225	293	1974
Zm00001d031971	chr1	208252891	208254322	-	Zm00001d031971	Zm00001d031971_T001;Zm00001d031971_T002	GO:0004197(cysteine-type endopeptidase activity);GO:0005615(extracellular space);GO:0005764(lysosome);GO:0006508(proteolysis);GO:0008233(peptidase activity);GO:0008234(cysteine-type peptidase activity);GO:0016787(hydrolase activity);GO:0051603(proteolysis involved in cellular protein catabolic process);GO:0051603(proteolysis involved in cellular protein catabolic process)	NA	NA	NA	Vignain	protein_coding	0.194363	0.610506	0.746821	3.69882	12.8451	12.612	0.43046	1.29983	0.264015	0.0001	0.26136	0.0758955	4.48526	3.78982	1.64158	3.87429	20.9206	18.5139	15	48	59	232	777	996	33	119	23	0	27	8	404	237	161	374	1675	1765
Zm00001d031986	chr1	208746944	208754876	-	Zm00001d031986	Zm00001d031986_T001;Zm00001d031986_T002;Zm00001d031986_T003;Zm00001d031986_T004;Zm00001d031986_T005;Zm00001d031986_T006	GO:0016020(membrane);GO:0016021(integral component of membrane);GO:0072657(protein localization to membrane);GO:0072657(protein localization to membrane)	NA	K17086	NA	Transmembrane 9 superfamily member 9	protein_coding	0.364697	5.46924	5.1703	3.73297	3.51505	2.40545	1.77075	0.468332	3.21761	6.09124	9.71011	6.82494	18.8218	16.0516	22.9141	6.10744	8.9584	12.1696	66	1008	959	554	502	449	316	101	646	1084	2310	1536	3993	2364	5264	1390	1694	2739
Zm00001d031996	chr1	209091746	209096011	-	Zm00001d031996	Zm00001d031996_T001;Zm00001d031996_T002;Zm00001d031996_T003;Zm00001d031996_T004;Zm00001d031996_T005;Zm00001d031996_T006;Zm00001d031996_T007;Zm00001d031996_T008	GO:0005515(protein binding);GO:0016567(protein ubiquitination);GO:0016567(protein ubiquitination)	NA	K23289	NA	WD repeat-containing protein DWA2	protein_coding	1.09875	0.879197	1.35583	4.39402	5.53284	6.69831	3.45906	1.05997	4.00535	0.337349	0.490744	0.459759	1.30652	1.17648	1.79651	0.236644	0.400076	1.31781	131	107	167	428	520	823	407	150	530	42	78	69	184	115	273	37	50	196
Zm00001d032152	chr1	214573739	214579407	+	cinnamoyl CoA reductase1	Zm00001d032152_T001	GO:0003824(catalytic activity);GO:0009809(lignin biosynthetic process);GO:0016491(oxidoreductase activity);GO:0016616(oxidoreductase activity, acting on the CH-OH group of donors, NAD or NADP as acceptor);GO:0050662(coenzyme binding);GO:0055114(oxidation-reduction process)	NA	NA	NA	cinnamoyl CoA reductase1	protein_coding	50.3391	35.6678	49.3685	15.9009	50.7062	23.6731	38.4072	46.0159	24.9904	18.1602	30.4342	44.3133	5.29937	0.540001	24.4329	1126.56	617.851	357.862	4466	3230	4496	1158	3556	2169	3362	4837	2461	1587	3558	4898	553	40	2759	125891	57407	39579
Zm00001d032183	chr1	216037845	216042486	-	Zm00001d032183	Zm00001d032183_T001;Zm00001d032183_T002;Zm00001d032183_T003;Zm00001d032183_T004;Zm00001d032183_T005;Zm00001d032183_T006;Zm00001d032183_T007;Zm00001d032183_T008	GO:0004197(cysteine-type endopeptidase activity);GO:0006508(proteolysis);GO:0008233(peptidase activity);GO:0016020(membrane);GO:0016021(integral component of membrane);GO:0016787(hydrolase activity);GO:0071586(CAAX-box protein processing);GO:0071586(CAAX-box protein processing)	NA	NA	NA	CAAX amino terminal protease family protein	protein_coding	9.86134	10.0514	9.45894	3.4901	4.16332	5.24168	3.33757	8.94442	2.94566	6.03504	6.28049	5.98596	1.74843	1.67893	2.6904	1.65134	1.47026	1.50487	2404	2502	2367	702	805	1321	805	2584	798	1451	2018	1820	504	336	836	509	378	460
Zm00001d032190	chr1	216310588	216316345	-	G2-like-transcription factor 6	Zm00001d032190_T002;Zm00001d032190_T003;Zm00001d032190_T004;Zm00001d032190_T005;Zm00001d032190_T007;Zm00001d032190_T008;Zm00001d032190_T009;Zm00001d032190_T010	GO:0003677(DNA binding);GO:0005634(nucleus);GO:0005634(nucleus)	NA	NA	NA	MYR1	protein_coding	1.09679	2.00748	2.17323	1.1678	0.778295	1.2712	1.46903	0.449961	3.88638	5.94818	13.7226	19.4816	2.87805	1.94094	4.3269	17.4557	13.9181	25.9211	351	656	713	307	198	421	464	172	1379	1873	5776	7751	1081	508	1760	7023	4656	10319
Zm00001d032229	chr1	218000408	218005083	+	Zm00001d032229	Zm00001d032229_T001;Zm00001d032229_T002;Zm00001d032229_T003;Zm00001d032229_T004;Zm00001d032229_T005;Zm00001d032229_T006	NA	NA	NA	NA	Regulator of chromosome condensation (RCC1) family protein	protein_coding	20.5371	23.1821	13.7954	34.2264	48.4156	42.0606	5.76281	20.8001	6.77209	28.4306	38.0665	33.6921	166.609	87.1145	82.1821	49.2393	39.3692	45.406	2346	2703	1618	3208	4370	4960	650	2815	859	3197	5727	4794	22349	8112	11940	7082	4708	6463
Zm00001d032261	chr1	219333374	219346185	+	Zm00001d032261	Zm00001d032261_T001;Zm00001d032261_T002;Zm00001d032261_T004;Zm00001d032261_T005;Zm00001d032261_T006;Zm00001d032261_T007	GO:0005515(protein binding);GO:0008168(methyltransferase activity);GO:0016491(oxidoreductase activity);GO:0016740(transferase activity);GO:0032259(methylation);GO:0055114(oxidation-reduction process);GO:0055114(oxidation-reduction process)	NA	K00574	EC:2.1.1.79	Cyclopropane-fatty-acyl-phospholipid synthase	protein_coding	3.52182	2.79866	2.05641	0.188799	0.560484	0.345766	1.47317	1.57692	1.7525	1.66771	2.97899	1.86006	1.01207	0.971972	0.889248	0.0330463	0.0242338	0.36646	1044	847	626	46	132	106	431	554	577	487	1164	687	353	235	336	13	8	136
Zm00001d032292	chr1	220640969	220642533	-	Zm00001d032292	Zm00001d032292_T001;Zm00001d032292_T002;Zm00001d032292_T003;Zm00001d032292_T004	NA	NA	NA	NA		protein_coding	98.8077	41.2839	68.5965	29.1411	69.9722	47.9354	70.3879	43.6433	85.4111	48.1342	296.365	316.997	14.8802	11.6611	38.8018	603.432	590.922	277.842	8199	3498	5843	1986	4589	4108	5762	4291	7866	3934	32402	32771	1452	791	4098	63068	51352	28741
Zm00001d032324	chr1	222454489	222455606	+	Zm00001d032324	Zm00001d032324_T001	NA	NA	NA	NA		protein_coding	2.4364	2.27938	2.33582	7.56241	16.5768	12.3584	11.0108	5.35001	13.1952	0.0001	0.836327	0.572696	4.85806	2.15083	8.04232	0.938998	2.79606	3.53415	141	134	139	358	755	735	626	366	844	0	64	42	329	102	590	69	169	254
Zm00001d032344	chr1	223288106	223291611	+	Zm00001d032344	Zm00001d032344_T001	GO:0004672(protein kinase activity);GO:0005515(protein binding);GO:0005524(ATP binding);GO:0005886(plasma membrane);GO:0006468(protein phosphorylation);GO:0009506(plasmodesma);GO:0016020(membrane);GO:0016021(integral component of membrane);GO:0016301(kinase activity);GO:0016310(phosphorylation);GO:0046777(protein autophosphorylation)	NA	NA	NA	Receptor-like protein kinase HSL1	protein_coding	1.18258	0.696783	0.998641	6.99906	4.90589	21.4225	5.8314	2.6637	5.55018	0.216679	0.141598	0.02994	1.19776	0.427569	0.564974	0.0001	0.090624	0.045615	233	141	202	1132	764	4357	1134	622	1214	43	37	8	278	69	142	0	19	12
Zm00001d032346	chr1	223326874	223334279	+	Zm00001d032346	Zm00001d032346_T001;Zm00001d032346_T002	GO:0003723(RNA binding);GO:0003978(UDP-glucose 4-epimerase activity);GO:0005829(cytosol);GO:0006012(galactose metabolic process);GO:0006364(rRNA processing);GO:0016020(membrane);GO:0016021(integral component of membrane);GO:0016021(integral component of membrane)	00052(Galactose metabolism);00520(Amino sugar and nucleotide sugar metabolism);00520(Amino sugar and nucleotide sugar metabolism)	K01784	EC:5.1.3.2	UDP-glucose 4-epimerase 4	protein_coding	11.1525	17.9164	11.9733	42.5334	78.6254	62.5885	19.0447	27.8442	19.2722	11.2434	14.2982	9.68205	46.0009	10.7965	32.7094	41.5771	64.6473	81.324	1443	2365	1590	4514	8035	8358	2430	4266	2767	1432	2437	1560	6990	1139	5384	6773	8756	13111
Zm00001d032422	chr1	225974745	225976171	+	Zm00001d032422	Zm00001d032422_T004	NA	NA	NA	NA	Dormancy-associated protein 1	protein_coding	669.991	479.073	503.366	1154.91	2024.58	2280.72	688.479	613.728	725.352	40.0298	109.339	174.827	413.877	798.027	920.323	24.3832	24.4389	40.6558	42277	30860	32605	59810	100969	148618	42861	45884	50804	2488	9092	13746	30690	41072	73902	1939	1616	3199
Zm00001d032430	chr1	226164158	226177345	-	uaz282	Zm00001d032430_T001;Zm00001d032430_T002	GO:0000064(L-ornithine transmembrane transporter activity);GO:0016020(membrane);GO:0016021(integral component of membrane);GO:1990575(mitochondrial L-ornithine transmembrane transport);GO:1990575(mitochondrial L-ornithine transmembrane transport)	NA	K15109	NA	Mitochondrial arginine transporter BAC1	protein_coding	3.74429	4.08638	3.96675	1.1749	4.95645	3.13035	1.00288	2.18957	1.02828	0.694244	1.30075	1.3409	0.414837	0.230791	0.367235	0.0001	0.395152	0.0918288	370	412	402	96	386	320	98	256	113	68	169	166	49	19	47	0	41	12
Zm00001d032457	chr1	227366143	227367991	+	Zm00001d032457	Zm00001d032457_T001	GO:0000166(nucleotide binding);GO:0004672(protein kinase activity);GO:0004674(protein serine/threonine kinase activity);GO:0004675(transmembrane receptor protein serine/threonine kinase activity);GO:0005524(ATP binding);GO:0005886(plasma membrane);GO:0006468(protein phosphorylation);GO:0007178(transmembrane receptor protein serine/threonine kinase signaling pathway);GO:0016301(kinase activity);GO…	NA	NA	NA	Protein kinase domain containing protein	protein_coding	4.01992	7.19331	4.18934	0.0001	0.397733	0.10151	1.13183	9.53271	2.93611	3.3256	13.2345	9.30268	1.45252	0.412254	2.12336	13.0896	17.0916	5.40513	402	734	430	0	32	11	112	1128	326	328	1742	1158	171	34	270	1647	1788	673
Zm00001d032468	chr1	227650951	227651577	+	Zm00001d032468	Zm00001d032468_T001	GO:0004497(monooxygenase activity);GO:0005506(iron ion binding);GO:0009809(lignin biosynthetic process);GO:0016020(membrane);GO:0016491(oxidoreductase activity);GO:0016705(oxidoreductase activity, acting on paired donors, with incorporation or reduction of molecular oxygen);GO:0016709(oxidoreductase activity, acting on paired donors, with incorporation or reduction of molecular oxygen, NAD(P)H as…	NA	NA	NA	Cytochrome P450 CYP84A33v1	protein_coding	12.9368	2.76175	7.06615	7.63429	1.55627	1.81513	5.52487	1.83339	2.7922	8.19963	8.29331	16.6194	0.706315	0.764686	2.17	11.4493	6.91164	3.48551	466	102	262	226	45	68	197	79	112	291	394	746	30	23	100	520	261	157
Zm00001d032481	chr1	228120902	228121240	+	Zm00001d032481	Zm00001d032481_T001	GO:0098869(cellular oxidant detoxification)	NA	NA	NA		protein_coding	108.441	33.0994	18.735	10.2096	6.44502	8.04042	3.52446	72.0865	6.33076	8.98297	94.2581	70.8547	25.5235	13.2539	14.8634	87.538	301.664	6.72906	2111	658	375	164	100	162	68	1663	137	173	2418	1719	584	211	369	2147	6150	164
Zm00001d032510	chr1	229000799	229004582	-	Zm00001d032510	Zm00001d032510_T001	GO:0043531(ADP binding)	NA	NA	NA	Putative disease resistance RPP13-like protein 1	protein_coding	2.00845	1.54387	1.35338	0.262519	0.571783	0.334998	4.1447	1.2898	7.17224	1.01336	1.54592	1.37373	0.118775	0.057515	0.20024	0.108236	0.037965	0.136131	379	297	262	41	86	66	771	288	1501	189	384	323	27	9	49	26	8	32
Zm00001d032529	chr1	229632719	229640091	+	folylpolyglutamate synthetase2	Zm00001d032529_T001;Zm00001d032529_T002;Zm00001d032529_T003;Zm00001d032529_T004;Zm00001d032529_T005;Zm00001d032529_T006;Zm00001d032529_T007;Zm00001d032529_T008;Zm00001d032529_T009;Zm00001d032529_T010;Zm00001d032529_T011	GO:0000166(nucleotide binding);GO:0004326(tetrahydrofolylpolyglutamate synthase activity);GO:0005524(ATP binding);GO:0005737(cytoplasm);GO:0005739(mitochondrion);GO:0005759(mitochondrial matrix);GO:0005829(cytosol);GO:0006730(one-carbon metabolic process);GO:0009058(biosynthetic process);GO:0009396(folic acid-containing compound biosynthetic process);GO:0016874(ligase activity);GO:0046872(metal i…	00790(Folate biosynthesis);00790(Folate biosynthesis)	K01930	EC:6.3.2.17	folylpolyglutamate synthetase2	protein_coding	1.98586	3.04513	3.2833	0.335323	0.203316	0.147451	1.68026	2.38798	2.14653	4.05368	3.01366	1.86609	1.11306	0.518845	1.18855	0.308567	0.382174	0.756915	483	758	821	69	41	37	405	688	581	973	967	567	319	104	369	96	98	230
Zm00001d032606	chr1	231874065	231884831	-	Zm00001d032606	Zm00001d032606_T001;Zm00001d032606_T002;Zm00001d032606_T003	NA	NA	NA	NA		protein_coding	0.0001	0.0001	0.0001	0.30417	0.170884	1.31932	0.0379218	0.0001	0.0313451	0.533501	1.27381	0.837932	26.9742	10.6435	9.84969	2.20407	1.97674	8.98393	0	0	0	49	27	266	8	0	7	104	329	204	6169	1690	2441	542	405	2181
Zm00001d032664	chr1	233548082	233551762	-	cytokinin oxidase6	Zm00001d032664_T001	GO:0003824(catalytic activity);GO:0009690(cytokinin metabolic process);GO:0016491(oxidoreductase activity);GO:0019139(cytokinin dehydrogenase activity);GO:0050660(flavin adenine dinucleotide binding);GO:0055114(oxidation-reduction process);GO:0071949(FAD binding)	00908(Zeatin biosynthesis)	K00279	EC:1.5.99.12	cytokinin oxidase6	protein_coding	1.10537	0.507801	0.668268	1.45259	0.891322	2.55788	0.599261	0.215721	0.711641	0.910659	1.32579	1.01565	0.233315	0.0001	0.399503	2.24464	1.88752	0.898054	133	63	83	143	85	317	71	31	95	108	210	152	33	0	61	339	237	135
Zm00001d032742	chr1	237017109	237019632	+	Zm00001d032742	Zm00001d032742_T001;Zm00001d032742_T002	GO:0004190(aspartic-type endopeptidase activity);GO:0006508(proteolysis);GO:0006629(lipid metabolic process);GO:0008233(peptidase activity);GO:0016787(hydrolase activity);GO:0030163(protein catabolic process);GO:0030163(protein catabolic process)	NA	NA	NA	Aspartic proteinase A1	protein_coding	0.0001	1.55639	0.0001	2.90524	9.76509	1.36373	2.08927	0.0001	1.19773	1.16772	6.75278	6.43787	24.8949	19.6768	22.0232	7.37594	5.24062	6.96919	0	113	0	170	548	100	147	0	95	82	632	569	2075	1139	1988	660	390	617
Zm00001d032870	chr1	240941211	240943277	-	Zm00001d032870	Zm00001d032870_T001	GO:0002229(defense response to oomycetes);GO:0004672(protein kinase activity);GO:0004675(transmembrane receptor protein serine/threonine kinase activity);GO:0005524(ATP binding);GO:0005886(plasma membrane);GO:0006468(protein phosphorylation);GO:0006952(defense response);GO:0007178(transmembrane receptor protein serine/threonine kinase signaling pathway);GO:0016020(membrane);GO:0016021(integral co…	NA	NA	NA	L-type lectin-domain containing receptor kinase V.9	protein_coding	1.20359	0.644926	0.276466	10.3611	8.39519	13.6795	7.33437	1.58923	12.042	0.179323	0.990771	1.09437	6.25012	3.51064	4.52321	0.4123	0.139871	1.76503	143	79	34	1010	788	1677	859	224	1587	21	155	162	872	340	684	62	18	262
Zm00001d032968	chr1	244998348	245014854	+	Zm00001d032968	Zm00001d032968_T001;Zm00001d032968_T002;Zm00001d032968_T003;Zm00001d032968_T004;Zm00001d032968_T005;Zm00001d032968_T006	GO:0008168(methyltransferase activity);GO:0016740(transferase activity);GO:0032259(methylation);GO:0032259(methylation)	NA	K07056	EC:2.1.1.198	Tetrapyrrole (Corrin/Porphyrin) Methylases	protein_coding	3.16836	2.6556	2.55349	1.77578	1.69419	3.29081	5.23786	3.58753	4.30535	0.989434	1.47911	0.621447	0.530295	0.157798	0.808739	0.511294	0.465541	1.38276	757	648	627	348	322	811	1235	1016	1141	234	466	186	150	31	247	155	118	413
Zm00001d032973	chr1	245143521	245150786	+	Zm00001d032973	Zm00001d032973_T001	GO:0010143(cutin biosynthetic process);GO:0016020(membrane);GO:0016021(integral component of membrane);GO:0016311(dephosphorylation);GO:0016740(transferase activity);GO:0016746(transferase activity, transferring acyl groups);GO:0016791(phosphatase activity);GO:0090447(glycerol-3-phosphate 2-O-acyltransferase activity)	NA	NA	NA	Glycerol-3-phosphate acyltransferase 5	protein_coding	1.83756	15.3761	5.15743	0.74744	0.52455	0.158477	0.109646	44.6449	0.27473	5.63637	6.1105	6.16114	0.941592	0.446851	3.90887	0.628711	0.895136	1.13924	201	1713	578	67	46	18	12	5771	34	606	879	838	121	40	543	87	103	155
Zm00001d033044	chr1	248431212	248432937	-	Zm00001d033044	Zm00001d033044_T001	GO:0016788(hydrolase activity, acting on ester bonds)	NA	NA	NA	GDSL esterase/lipase	protein_coding	1.33195	0.0001	0.260629	0.967851	4.44437	6.95231	0.0001	0.143509	0.08082	2.43946	1.43673	1.43485	0.297914	0.192474	0.09874	0.925888	2.521	0.997012	112	0	23	67	295	602	0	15	8	202	159	150	30	14	11	98	222	105
Zm00001d033077	chr1	249770156	249771444	-	Zm00001d033077	Zm00001d033077_T001	GO:0004222(metalloendopeptidase activity);GO:0005515(protein binding);GO:0006508(proteolysis);GO:0008233(peptidase activity);GO:0008237(metallopeptidase activity);GO:0016020(membrane);GO:0016021(integral component of membrane)	NA	NA	NA	Membrane metalloprotease ARASP chloroplastic	protein_coding	3.73522	3.1885	3.82888	2.11435	2.25256	2.1104	3.46168	3.92591	3.59967	34.5194	47.7407	54.6172	19.0041	13.7838	22.1705	61.9827	37.8396	50.9546	277	241	291	129	132	162	253	345	296	2517	4656	5037	1653	833	2089	5779	2934	4702
Zm00001d033222	chr1	255021507	255023321	-	viviparous14	Zm00001d033222_T001	GO:0009507(chloroplast);GO:0009536(plastid);GO:0009570(chloroplast stroma);GO:0009688(abscisic acid biosynthetic process);GO:0010436(carotenoid dioxygenase activity);GO:0016121(carotene catabolic process);GO:0016491(oxidoreductase activity);GO:0016702(oxidoreductase activity, acting on single donors with incorporation of molecular oxygen, incorporation of two atoms of oxygen);GO:0045549(9-cis-epo…	NA	NA	NA	viviparous14	protein_coding	0.446024	0.895902	0.509172	0.969519	2.63971	1.65094	1.71627	0.586053	2.91034	0.365312	1.08872	1.79138	9.28794	3.01263	12.7575	4.68458	6.88568	1.42431	47	96	55	83	218	178	177	73	337	38	150	233	1138	257	1692	615	752	186
Zm00001d033231	chr1	255266246	255275500	+	Zm00001d033231	Zm00001d033231_T001;Zm00001d033231_T002;Zm00001d033231_T003;Zm00001d033231_T004	GO:0005576(extracellular region);GO:0019953(sexual reproduction);GO:0019953(sexual reproduction)	NA	NA	NA	Expansin-B4	protein_coding	0.38651	0.161268	0.240995	0.566491	1.43112	2.76033	0.106307	0.272315	0.0773805	0.574127	0.890055	0.605281	0.340249	0.203578	0.349097	0.132844	1.08689	4.77556	108	46	69	129	314	790	30	90	24	157	326	209	111	46	123	47	315	1648
Zm00001d033241	chr1	255565519	255569235	+	Zm00001d033241	Zm00001d033241_T001	GO:0003333(amino acid transmembrane transport);GO:0005313(L-glutamate transmembrane transporter activity);GO:0005886(plasma membrane);GO:0006865(amino acid transport);GO:0015171(amino acid transmembrane transporter activity);GO:0015189(L-lysine transmembrane transporter activity);GO:0016020(membrane);GO:0016021(integral component of membrane);GO:0022857(transmembrane transporter activity);GO:0051…	NA	NA	NA	Cationic amino acid transporter 1	protein_coding	0.689405	0.0001	0.449441	16.4135	2.58863	6.80219	12.9393	1.016	12.9177	0.302208	0.227403	0.214205	1.17171	0.683226	4.86204	0.0001	0.191795	1.16492	78	0	52	1508	229	787	1429	135	1605	34	34	30	155	63	693	0	23	163
Zm00001d033347	chr1	259828724	259831189	+	LBD-transcription factor 11	Zm00001d033347_T001	GO:0010468(regulation of gene expression)	NA	NA	NA	LOB domain-containing protein 38	protein_coding	13.1898	10.3984	9.63192	67.3813	89.9948	106.523	0.50946	7.88191	1.43554	7.80027	14.9756	13.3754	29.3139	22.3203	45.385	40.165	23.4256	21.0551	1302	1048	976	5459	7021	10858	50	922	158	759	1948	1645	3400	1797	5701	4994	2422	2591
Zm00001d033391	chr1	261539895	261541635	+	Zm00001d033391	Zm00001d033391_T001	NA	NA	NA	NA		protein_coding	26.4968	34.4385	26.7684	1.01097	0.710001	1.91796	2.78689	9.24623	0.964138	14.3748	14.271	13.8971	0.363184	0.0001	0.128332	6.83168	13.2828	16.8782	2149	2851	2228	68	46	161	223	889	87	1148	1525	1404	35	0	14	698	1128	1706
Zm00001d033396	chr1	261791305	261794041	-	GRF-transcription factor 4	Zm00001d033396_T001;Zm00001d033396_T002;Zm00001d033396_T003;Zm00001d033396_T004	GO:0005524(ATP binding);GO:0005634(nucleus);GO:0006351(transcription, DNA-templated);GO:0006355(regulation of transcription, DNA-templated);GO:0032502(developmental process);GO:0032502(developmental process)	NA	NA	NA	Growth-regulating factor 2	protein_coding	1.81115	2.60456	2.77558	1.79505	2.87418	2.36801	2.15206	2.49844	1.96427	1.79345	0.735326	0.54747	0.0001	0.044854	0.143743	0.0001	0.034929	0.11311	187	274	294	152	234	252	219	305	225	182	100	71	0	4	19	0	4	15
Zm00001d033662	chr1	269968476	269969325	+	Zm00001d033662	Zm00001d033662_T001	GO:0003824(catalytic activity);GO:0004722(protein serine/threonine phosphatase activity);GO:0004724(magnesium-dependent protein serine/threonine phosphatase activity);GO:0006470(protein dephosphorylation)	NA	NA	NA	Probable protein phosphatase 2C 5	protein_coding	0.0001	0.0001	0.0001	0.0001	0.0001	0.0001	0.0001	0.0001	0.0001	1.62421	1.02056	1.3652	9.51825	4.70714	6.11623	3.84149	2.48579	3.75315	0	0	0	0	0	0	0	0	0	61	51	64	421	145	293	182	98	176
Zm00001d033707	chr1	271815374	271818063	-	Zm00001d033707	Zm00001d033707_T001	GO:0004364(glutathione transferase activity);GO:0004482(mRNA (guanine-N7-)-methyltransferase activity);GO:0004602(glutathione peroxidase activity);GO:0005635(nuclear envelope);GO:0005773(vacuole);GO:0005783(endoplasmic reticulum);GO:0005794(Golgi apparatus);GO:0006370(7-methylguanosine mRNA capping);GO:0008168(methyltransferase activity);GO:0016020(membrane);GO:0016021(integral component of membr…	00480(Glutathione metabolism)	K00799	EC:2.5.1.18	Microsomal glutathione s-transferase	protein_coding	8.36429	6.80458	6.59672	8.4226	11.9492	17.8561	47.3504	22.1026	39.6288	10.2858	17.4496	12.6857	45.7374	26.2224	39.36	98.2496	114.351	133.546	476	396	386	394	538	1050	2659	1491	2503	577	1309	900	3059	1217	2851	7043	6815	9474
Zm00001d033786	chr1	273671338	273678008	+	Zm00001d033786	Zm00001d033786_T001;Zm00001d033786_T002;Zm00001d033786_T003;Zm00001d033786_T004;Zm00001d033786_T005	GO:0000155(phosphorelay sensor kinase activity);GO:0000160(phosphorelay signal transduction system);GO:0005622(intracellular);GO:0007165(signal transduction);GO:0016020(membrane);GO:0016021(integral component of membrane);GO:0016301(kinase activity);GO:0016310(phosphorylation);GO:0016772(transferase activity, transferring phosphorus-containing groups);GO:0023014(signal transduction by protein pho…	04075(Plant hormone signal transduction);04075(Plant hormone signal transduction)	K14489	EC:2.7.13.3	histidine kinase4	protein_coding	5.94586	8.12917	7.28498	8.08894	12.1347	15.6016	10.4067	12.0094	14.9734	0.0362808	0.228448	0.404618	4.79441	1.71786	5.72576	0.670193	1.05921	6.10171	1259	1756	1583	1406	2031	3410	2173	3011	3517	8	64	107	1193	297	1542	179	235	1610
Zm00001d033790	chr1	273754568	273757111	+	Zm00001d033790	Zm00001d033790_T001;Zm00001d033790_T002;Zm00001d033790_T003;Zm00001d033790_T004	GO:0000166(nucleotide binding);GO:0005524(ATP binding);GO:0005737(cytoplasm);GO:0005856(cytoskeleton);GO:0005856(cytoskeleton)	NA	K10355	NA	Actin-1	protein_coding	71.8461	71.1658	70.4845	0.835257	2.04963	0.805198	4.58543	21.0809	2.94901	32.3605	46.9515	47.7603	2.70968	2.0284	5.47735	147.77	127.506	117.759	9357	9461	9424	90	212	110	590	3254	428	4152	8058	7750	415	216	909	24242	17392	19119
Zm00001d033797	chr1	274041149	274045067	-	Zm00001d033797	Zm00001d033797_T001;Zm00001d033797_T002;Zm00001d033797_T003	GO:0016020(membrane);GO:0016298(lipase activity);GO:0016787(hydrolase activity);GO:0016787(hydrolase activity)	00561(Glycerolipid metabolism);00561(Glycerolipid metabolism)	K01054	EC:3.1.1.23	alpha/beta-Hydrolases superfamily protein	protein_coding	0.160313	0.126851	0.0408268	11.9733	15.9856	21.6535	3.83029	0.313282	1.94597	0.244508	0.235829	0.231238	11.4561	2.82012	8.21069	93.3573	77.7613	105.221	20	15	6	1122	1442	2552	432	43	247	28	36	34	1537	263	1193	13418	9293	14968
Zm00001d033857	chr1	276045738	276047507	-	Zm00001d033857	Zm00001d033857_T001	GO:0010052(guard cell differentiation);GO:0010374(stomatal complex development)	NA	NA	NA	EPIDERMAL PATTERNING FACTOR-like protein 2	protein_coding	5.36582	4.9954	4.18587	1.50775	2.82273	6.32547	3.05665	9.60211	4.45057	3.02353	0.957884	1.32421	0.482095	0.053634	1.46912	0.597611	0.122927	0.070175	462	439	370	107	192	562	260	978	425	256	109	142	49	4	161	65	12	8
Zm00001d033869	chr1	276803098	276804885	+	empty pericarp4	Zm00001d033869_T001	GO:0005515(protein binding);GO:0005739(mitochondrion)	NA	NA	NA	empty pericarp4	protein_coding	3.05645	1.89825	2.1321	1.16061	1.9506	1.8942	1.79361	1.12853	3.24681	0.846365	0.865262	0.946792	0.216737	0.078662	0.161152	0.0001	0.069936	0.058754	314	199	225	98	159	201	182	138	370	86	118	122	27	7	22	0	8	8
Zm00001d033976	chr1	279923057	279925806	-	Aux/IAA-transcription factor4	Zm00001d033976_T001;Zm00001d033976_T002;Zm00001d033976_T003;Zm00001d033976_T004	GO:0005515(protein binding);GO:0005634(nucleus);GO:0006351(transcription, DNA-templated);GO:0006355(regulation of transcription, DNA-templated);GO:0009734(auxin-activated signaling pathway);GO:0009734(auxin-activated signaling pathway)	04075(Plant hormone signal transduction);04075(Plant hormone signal transduction)	K14484	NA	Aux/IAA-transcription factor4	protein_coding	12.9056	20.1627	15.7876	9.65164	19.9157	7.57711	3.12725	8.16515	8.16542	7.07495	25.3125	13.3646	1.00128	0.896939	1.99728	0.827377	1.68283	1.06191	1103	1755	1382	678	1344	670	265	827	775	597	2846	1422	101	63	219	89	152	113
Zm00001d033980	chr1	279980867	279981749	+	ustilago maydis induced12	Zm00001d033980_T001	GO:0000786(nucleosome);GO:0003677(DNA binding);GO:0005509(calcium ion binding);GO:0005634(nucleus);GO:0005694(chromosome);GO:0046982(protein heterodimerization activity)	NA	NA	NA	ustilago maydis induced12	protein_coding	0.993111	0.310494	0.0001	1.44298	5.06361	6.12158	1.23605	0.505341	0.318166	3.44069	3.22058	3.04157	12.3283	5.55983	15.9271	167.812	60.679	109.271	46	15	0	54	182	288	56	28	17	155	193	173	659	207	922	9613	2891	6196
Zm00001d033987	chr1	280368696	280370932	-	HSF-transcription factor 17	Zm00001d033987_T001	GO:0000978(RNA polymerase II cis-regulatory region sequence-specific DNA binding);GO:0003677(DNA binding);GO:0003700(DNA-binding transcription factor activity);GO:0005634(nucleus);GO:0006355(regulation of transcription, DNA-templated);GO:0034605(cellular response to heat);GO:0042025(host cell nucleus);GO:0043565(sequence-specific DNA binding);GO:0043618(regulation of transcription from RNA polyme…	NA	K09419	NA	Heat stress transcription factor A-6b	protein_coding	0.105233	0.0001	0.0001	0.12828	0.385999	0.126711	0.198367	0.055388	0.269957	0.0001	0.0001	0.0001	1.00663	0.366303	0.780714	6.7581	7.88754	35.4429	12	0	0	12	33	14	21	7	32	0	0	0	126	32	106	902	875	4679
Zm00001d034017	chr1	281247257	281250037	+	Zm00001d034017	Zm00001d034017_T001;Zm00001d034017_T002	GO:0004553(hydrolase activity, hydrolyzing O-glycosyl compounds);GO:0005975(carbohydrate metabolic process);GO:0008422(beta-glucosidase activity);GO:0009251(glucan catabolic process);GO:0016020(membrane);GO:0016021(integral component of membrane);GO:0016787(hydrolase activity);GO:0016787(hydrolase activity)	NA	NA	NA	Exhydrolase II	protein_coding	468.995	472.001	566.261	17.3893	19.9626	41.8698	3.53373	234.655	5.19623	225.615	175.747	238.482	85.1985	54.7331	43.8561	2.31313	4.43091	5.68201	63011	64737	78095	1918	2121	5810	469	37354	775	29855	31116	39923	13452	5999	7499	392	624	952
Zm00001d034027	chr1	281459768	281460979	-	Zm00001d034027	Zm00001d034027_T001;Zm00001d034027_T002;Zm00001d034027_T003;Zm00001d034027_T004;Zm00001d034027_T005	NA	NA	NA	NA	Ethylene-responsive protein	protein_coding	0.694532	1.55585	2.10732	0.941119	0.906689	0.691906	1.1246	2.23155	0.353838	17.1962	2.70335	0.97965	58.8847	29.2207	36.1552	2.55732	1.42903	31.5946	41	93	128	46	43	42	65	155	23	991	210	73	4043	1394	2688	189	88	2302
Zm00001d034031	chr1	281622708	281623163	+	Zm00001d034031	Zm00001d034031_T001	NA	NA	NA	NA		protein_coding	69.6668	41.2346	72.9208	104.257	162.613	153.36	34.4869	28.3592	75.6808	14.9101	23.2151	25.9477	71.8931	34.6002	41.9289	272.213	114.393	192.838	1824	1103	1960	2241	3365	4147	891	880	2200	385	801	847	2212	739	1397	8979	3137	6295
Zm00001d034073	chr1	283193730	283197425	-	WRKY-transcription factor 30	Zm00001d034073_T001;Zm00001d034073_T002	GO:0003677(DNA binding);GO:0003700(DNA-binding transcription factor activity);GO:0005634(nucleus);GO:0006355(regulation of transcription, DNA-templated);GO:0043565(sequence-specific DNA binding);GO:0043565(sequence-specific DNA binding)	NA	NA	NA	Probable WRKY transcription factor 57	protein_coding	2.35837	0.351791	0.40482	6.42954	3.10966	19.5179	26.1565	5.52454	19.156	0.619617	1.04016	0.785014	1.83789	1.8895	5.90723	1.43252	1.72582	4.95892	238	37	43	533	249	2032	2601	660	2144	62	139	99	219	156	758	183	183	624
Zm00001d034077	chr1	283422354	283423470	-	Zm00001d034077	Zm00001d034077_T001;Zm00001d034077_T002	GO:0000166(nucleotide binding);GO:0000723(telomere maintenance);GO:0003678(DNA helicase activity);GO:0004386(helicase activity);GO:0005524(ATP binding);GO:0006281(DNA repair);GO:0006310(DNA recombination);GO:0006508(proteolysis);GO:0006974(cellular response to DNA damage stimulus);GO:0008234(cysteine-type peptidase activity);GO:0009055(electron transfer activity);GO:0016020(membrane);GO:0016021(i…	NA	NA	NA		protein_coding	1.95169	0.98629	1.29122	2.1431	3.3964	3.06637	3.70696	2.9773	3.07766	0.742773	1.4124	1.21868	10.3063	8.91526	8.8398	4.71263	5.62833	14.5199	115	59	78	103	158	186	214	208	200	44	109	89	710	426	659	348	345	1060
Zm00001d034150	chr1	285138708	285141599	-	Zm00001d034150	Zm00001d034150_T001	GO:0004784(superoxide dismutase activity);GO:0006801(superoxide metabolic process);GO:0016874(ligase activity);GO:0019430(removal of superoxide radicals);GO:0046872(metal ion binding);GO:0055114(oxidation-reduction process)	NA	NA	NA	E3 ubiquitin-protein ligase RGLG1	protein_coding	0.0001	0.0001	0.0001	0.0001	0.0001	0.0001	0.054956	0.063192	0.0001	14.7262	1.71082	8.90955	2.87658	0.181344	6.182	45.451	10.1394	1.21728	0	0	0	0	0	0	4	6	0	1023	159	783	239	11	555	4037	749	108
Zm00001d034188	chr1	286077537	286080394	+	Zm00001d034188	Zm00001d034188_T001;Zm00001d034188_T002;Zm00001d034188_T003;Zm00001d034188_T004	GO:0016020(membrane);GO:0016021(integral component of membrane);GO:0016021(integral component of membrane)	NA	NA	NA	Cold-regulated 413 plasma membrane protein 2	protein_coding	19.7432	8.52777	9.11049	73.4322	82.7648	121.244	18.3085	12.8607	26.9995	3.94161	9.87683	10.7915	27.2224	14.9909	31.3631	49.2514	67.2924	112.48	1817	803	863	5546	6019	11518	1663	1404	2759	359	1199	1238	2944	1127	3674	5710	6485	12901
Zm00001d034208	chr1	286841281	286844749	-	Zm00001d034208	Zm00001d034208_T001	GO:0000145(exocyst);GO:0006887(exocytosis);GO:0006893(Golgi to plasma membrane transport);GO:0006904(vesicle docking involved in exocytosis);GO:0016020(membrane)	NA	NA	NA	Exocyst complex component SEC15A	protein_coding	0.0001	0.0001	0.0001	0.0001	0.0001	0.0001	0.0001	0.0001	0.0001	4.42077	6.08974	4.20694	12.5823	8.01397	16.0697	5.87092	2.98526	3.4399	0	0	0	0	0	0	0	0	0	441	812	530	1495	661	2068	748	317	434
Zm00001d034360	chr1	290672852	290677815	-	Zm00001d034360	Zm00001d034360_T001	GO:0003676(nucleic acid binding);GO:0003677(DNA binding);GO:0003917(DNA topoisomerase type I (single strand cut, ATP-independent) activity);GO:0006265(DNA topological change);GO:0008270(zinc ion binding)	NA	NA	NA	zinc knuckle (CCHC-type) family protein	protein_coding	0.988909	0.659105	0.538946	0.376155	0.387575	0.520791	4.10245	1.33007	4.35558	0.28347	0.747038	0.401278	1.87001	1.00254	1.60129	0.246888	0.424216	0.436176	93	63	52	29	29	51	379	148	452	27	92	47	206	77	191	30	42	51
Zm00001d034373	chr1	291111822	291114965	-	GRMZM2G329181	Zm00001d034373_T001	NA	NA	NA	NA		protein_coding	12.1699	14.4129	8.43472	3.07536	4.95566	11.3004	2.16787	14.547	4.2131	12.6964	50.161	36.3954	3.2249	1.78653	4.15163	15.7353	36.5465	21.4643	1457	1762	1037	303	469	1398	257	2064	560	1497	7914	5429	454	175	633	2373	4583	3204
Zm00001d034421	chr1	292486760	292492680	-	Zm00001d034421	Zm00001d034421_T001;Zm00001d034421_T002;Zm00001d034421_T003;Zm00001d034421_T004;Zm00001d034421_T005	GO:0000166(nucleotide binding);GO:0004672(protein kinase activity);GO:0005524(ATP binding);GO:0005737(cytoplasm);GO:0005856(cytoskeleton);GO:0006468(protein phosphorylation);GO:0016301(kinase activity);GO:0016310(phosphorylation);GO:0016310(phosphorylation)	NA	NA	NA	Actin-7	protein_coding	0.0001	0.0235942	0.0001	0.0255084	0.0587376	0.059741	0.0001	0.0001	0.0001	4.10112	7.71337	7.75302	15.6669	15.5221	25.6269	10.267	5.80087	3.55853	0	4	0	4	8	10	0	0	0	626	1572	1495	2845	1957	5039	1998	941	687
Zm00001d034447	chr1	293289851	293293079	-	bZIP-transcription factor 41	Zm00001d034447_T001;Zm00001d034447_T002	GO:0003700(DNA-binding transcription factor activity);GO:0006355(regulation of transcription, DNA-templated);GO:0006355(regulation of transcription, DNA-templated)	NA	NA	NA	Basic leucine zipper 25	protein_coding	1.37052	1.99579	2.55534	2.54232	4.19846	4.64317	1.73971	1.80393	1.81674	1.66095	5.87328	6.60516	27.6595	22.6148	20.8625	3.08976	1.63746	10.6778	203	302	388	309	491	708	254	316	298	242	1143	1216	4797	2723	3919	575	254	1965
Zm00001d034453	chr1	293423687	293425838	-	Zm00001d034453	Zm00001d034453_T001	GO:0000162(tryptophan biosynthetic process);GO:0003824(catalytic activity);GO:0004834(tryptophan synthase activity);GO:0005829(cytosol);GO:0006568(tryptophan metabolic process);GO:0009507(chloroplast);GO:0016829(lyase activity)	00402(Benzoxazinoid biosynthesis)	K13222	EC:4.1.2.8	Tryptophan synthase alpha chain chloroplastic	protein_coding	5.44814	1.22985	5.05969	0.512132	3.47378	1.24108	2.63654	0.718665	12.0673	9.00187	30.5674	26.4262	10.236	5.67295	12.5012	141.074	221.777	39.5847	478	111	456	37	241	113	228	75	1174	777	3530	2885	1054	406	1394	15571	20353	4325
Zm00001d034479	chr1	294118392	294119816	+	histone one (H1)	Zm00001d034479_T001	GO:0000786(nucleosome);GO:0003677(DNA binding);GO:0003690(double-stranded DNA binding);GO:0005634(nucleus);GO:0005694(chromosome);GO:0006334(nucleosome assembly);GO:0006355(regulation of transcription, DNA-templated);GO:0016584(nucleosome positioning);GO:0030261(chromosome condensation);GO:0031492(nucleosomal DNA binding);GO:0031936(negative regulation of chromatin silencing);GO:0042025(host cell…	NA	NA	NA	histone one (H1)	protein_coding	302.075	182.021	323.746	14.3294	23.1914	25.526	44.8291	70.0016	32.9433	215.207	458.74	636.425	63.9553	91.5724	115.25	146.89	313.911	718.884	23085	14200	25397	899	1401	2015	3380	6339	2795	16198	46197	60600	5744	5708	11209	14141	25127	68494
Zm00001d034497	chr1	294670633	294671503	+	Zm00001d034497	Zm00001d034497_T001;Zm00001d034497_T002;Zm00001d034497_T003	GO:0005886(plasma membrane);GO:0005886(plasma membrane)	NA	NA	NA	cysteine-rich TM module stress tolerance protein	protein_coding	2.41086	1.21447	2.63753	12.7966	17.0742	17.5756	43.0022	6.31718	22.8268	6.79761	19.1952	14.7583	49.6627	28.2914	46.3937	36.116	53.9685	173.167	122	64	137	526	676	909	2123	376	1269	336	1267	921	2920	1155	2955	2277	2829	10798
Zm00001d034555	chr1	296175631	296185070	+	Zm00001d034555	Zm00001d034555_T001;Zm00001d034555_T002;Zm00001d034555_T003;Zm00001d034555_T004;Zm00001d034555_T005;Zm00001d034555_T006;Zm00001d034555_T007;Zm00001d034555_T008;Zm00001d034555_T009;Zm00001d034555_T010;Zm00001d034555_T011;Zm00001d034555_T012;Zm00001d034555_T013;Zm00001d034555_T014;Zm00001d034555_T015;Zm00001d034555_T016;Zm00001d034555_T017;Zm00001d034555_T018;Zm00001d034555_T019;Zm00001d034555_T020…	GO:0000166(nucleotide binding);GO:0004672(protein kinase activity);GO:0005524(ATP binding);GO:0006468(protein phosphorylation);GO:0006952(defense response);GO:0016301(kinase activity);GO:0016310(phosphorylation);GO:0043531(ADP binding);GO:0043531(ADP binding)	NA	NA	NA	Disease resistance protein RPM1	protein_coding	3.25414	2.80821	3.63172	7.55831	16.2746	13.2728	5.92258	3.06827	6.83177	0.0208279	0.181999	0.0542034	0.587023	0.381011	0.678905	0.0120326	0.0222943	0.00661832	1484	1308	1700	2829	5866	6251	2665	1658	3461	10	110	31	315	142	394	7	11	4
Zm00001d034616	chr1	297863276	297876107	+	Zm00001d034616	Zm00001d034616_T001;Zm00001d034616_T002;Zm00001d034616_T004;Zm00001d034616_T006	GO:0003779(actin binding);GO:0005737(cytoplasm);GO:0005856(cytoskeleton);GO:0030036(actin cytoskeleton organization);GO:0034237(protein kinase A regulatory subunit binding);GO:0071933(Arp2/3 complex binding);GO:2000601(positive regulation of Arp2/3 complex-mediated actin nucleation);GO:2000601(positive regulation of Arp2/3 complex-mediated actin nucleation)	NA	NA	NA	Protein SCAR2	protein_coding	2.25699	2.25364	2.69826	8.00589	14.3191	13.5469	9.36104	3.51926	14.2061	1.55302	2.15136	1.58921	6.11356	2.64198	4.69408	1.75471	1.43779	1.14729	869	885	1065	2528	4353	5380	3552	1604	6064	589	1091	762	2764	830	2299	851	579	550
Zm00001d034700	chr1	300208996	300210414	-	Zm00001d034700	Zm00001d034700_T001	GO:0009639(response to red or far red light);GO:0009959(negative gravitropism)	NA	NA	NA	GIL1 (GRAVITROPIC IN THE LIGHT)	protein_coding	5.3099	5.58132	2.58944	1.62852	1.90767	3.20941	6.21162	6.89187	11.7442	6.31515	8.99523	8.59896	0.504278	0.139447	0.353648	2.14653	2.27666	1.496	433	465	217	109	123	271	500	666	1063	507	966	873	49	10	37	221	195	152
Zm00001d034725	chr1	300790094	300803516	-	Zm00001d034725	Zm00001d034725_T001	GO:0016787(hydrolase activity)	NA	NA	NA	Haloacid dehalogenase-like hydrolase (HAD) superfamily protein	protein_coding	0.529312	0.557938	0.276284	0.814771	0.914558	0.418855	3.79911	0.345088	3.37422	1.53139	3.3588	4.11043	11.5971	6.48295	9.88847	13.5662	22.6504	3.59626	43	46	23	54	58	35	298	33	298	120	352	407	1083	420	1000	1358	1884	357
Zm00001d034732	chr1	300946909	300949101	-	Zm00001d034732	Zm00001d034732_T001	GO:0010143(cutin biosynthetic process);GO:0016020(membrane);GO:0016311(dephosphorylation);GO:0016740(transferase activity);GO:0016746(transferase activity, transferring acyl groups);GO:0016791(phosphatase activity);GO:0090447(glycerol-3-phosphate 2-O-acyltransferase activity)	NA	NA	NA	Glycerol-3-phosphate acyltransferase 1	protein_coding	2.87743	3.04657	2.99766	1.87651	1.42144	2.09746	2.74559	0.791242	1.32688	1.78118	1.83335	1.4326	0.69384	0.327767	0.622061	4.04378	5.54808	12.4839	300	324	321	161	117	226	282	98	154	183	252	186	85	28	83	530	605	1620
Zm00001d034733	chr1	300954125	300961062	-	Zm00001d034733	Zm00001d034733_T001;Zm00001d034733_T002;Zm00001d034733_T003	GO:0004335(galactokinase activity);GO:0005524(ATP binding);GO:0005534(galactose binding);GO:0005737(cytoplasm);GO:0005829(cytosol);GO:0006012(galactose metabolic process);GO:0016301(kinase activity);GO:0016310(phosphorylation);GO:0016773(phosphotransferase activity, alcohol group as acceptor);GO:0033499(galactose catabolic process via UDP-galactose);GO:0046835(carbohydrate phosphorylation);GO:004…	NA	K18674	EC:2.7.1.157	Galactokinase	protein_coding	6.35275	5.40975	4.48084	34.2199	40.1971	45.4898	22.6018	11.057	24.1049	8.41522	12.8093	8.09705	156.209	129.97	124.516	18.3224	16.5317	83.8041	967	840	699	4268	4828	7139	3388	1992	4066	1261	2565	1534	27889	16106	24075	3508	2632	15874
Zm00001d035013	chr6	1819415	1821213	-	Zm00001d035013	Zm00001d035013_T001	GO:0004497(monooxygenase activity);GO:0005506(iron ion binding);GO:0016020(membrane);GO:0016021(integral component of membrane);GO:0016491(oxidoreductase activity);GO:0016705(oxidoreductase activity, acting on paired donors, with incorporation or reduction of molecular oxygen);GO:0016709(oxidoreductase activity, acting on paired donors, with incorporation or reduction of molecular oxygen, NAD(P)H…	NA	NA	NA	Cytochrome P450 71A26	protein_coding	0.0001	0.0001	0.077615	0.0001	0.0001	0.0001	0.0001	0.0001	0.0001	0.0001	0.276276	0.107626	3.53143	0.652811	1.25507	4.0458	1.29329	0.82063	0	0	8	0	0	0	0	0	0	0	35	13	391	51	151	481	128	97
Zm00001d035050	chr6	3217441	3223266	-	Zm00001d035050	Zm00001d035050_T001;Zm00001d035050_T002;Zm00001d035050_T003;Zm00001d035050_T005;Zm00001d035050_T007;Zm00001d035050_T008;Zm00001d035050_T010;Zm00001d035050_T014;Zm00001d035050_T015	GO:0000166(nucleotide binding);GO:0000307(cyclin-dependent protein kinase holoenzyme complex);GO:0000790(nuclear chromatin);GO:0004672(protein kinase activity);GO:0004674(protein serine/threonine kinase activity);GO:0004693(cyclin-dependent protein serine/threonine kinase activity);GO:0005524(ATP binding);GO:0005634(nucleus);GO:0006468(protein phosphorylation);GO:0008353(RNA polymerase II CTD hep…	NA	NA	NA		protein_coding	1.77725	4.61727	3.47766	1.45096	2.63093	3.0857	5.02406	5.0464	4.87657	1.2209	3.04093	2.13383	0.70589	0.537305	1.29714	0.125365	0.586424	0.993912	444	1173	887	299	516	792	1230	1484	1344	301	996	662	209	111	412	41	153	310
Zm00001d035064	chr6	3473940	3475403	+	Zm00001d035064	Zm00001d035064_T001	GO:0016740(transferase activity);GO:0016747(transferase activity, transferring acyl groups other than amino-acyl groups)	NA	NA	NA	HXXXD-type acyl-transferase family protein	protein_coding	0.522187	0.083598	0.135367	0.286721	0.056597	0.086325	0.017203	0.140439	0.034583	1.88374	2.0535	2.39443	0.713122	0.328277	1.98007	0.247367	1.34996	0.712351	44	8	12	20	4	8	2	14	4	156	228	251	71	23	212	27	119	75
Zm00001d035157	chr6	7246875	7250944	+	Zm00001d035157	Zm00001d035157_T001;Zm00001d035157_T002	GO:0003333(amino acid transmembrane transport);GO:0005886(plasma membrane);GO:0015171(amino acid transmembrane transporter activity);GO:0016020(membrane);GO:0016021(integral component of membrane);GO:0016021(integral component of membrane)	NA	NA	NA	Lysine histidine transporter 2	protein_coding	5.87674	5.64971	4.57598	63.8814	101.367	52.5692	59.3599	10.7595	135.275	0.848067	7.13252	5.66539	16.9157	18.8476	64.2177	9.45098	14.2559	11.4069	636	624	508	5666	8658	5867	6329	1379	16225	91	1016	763	2148	1663	8831	1288	1615	1538
Zm00001d035163	chr6	7409171	7417031	+	Zm00001d035163	Zm00001d035163_T001	GO:0003333(amino acid transmembrane transport);GO:0005886(plasma membrane);GO:0015171(amino acid transmembrane transporter activity);GO:0016020(membrane);GO:0016021(integral component of membrane)	NA	NA	NA	Lysine histidine transporter 2	protein_coding	0.269427	0.626285	0.468221	0.316249	0.38688	0.928281	1.37922	0.591864	1.86241	0.397983	0.765693	0.24532	2.602	1.57682	5.13147	2.2554	3.45139	3.11951	23	54	41	22	26	81	115	59	174	33	85	26	258	109	549	239	304	327
Zm00001d035166	chr6	7479108	7485895	+	Zm00001d035166	Zm00001d035166_T001;Zm00001d035166_T002	GO:0003333(amino acid transmembrane transport);GO:0005886(plasma membrane);GO:0015171(amino acid transmembrane transporter activity);GO:0016020(membrane);GO:0016021(integral component of membrane);GO:0016021(integral component of membrane)	NA	NA	NA	Lysine histidine transporter 2	protein_coding	0.046279	0.0001	0.022825	3.76993	2.254	3.2056	12.5309	2.34347	21.0187	0.071201	0.034741	0.136299	0.791316	0.440772	1.77297	0.986503	1.01321	2.7678	8	0	4	497	286	532	1984	446	3744	12	8	28	150	58	363	200	171	554
Zm00001d035256	chr6	17759389	17765846	-	ragged seedling1	Zm00001d035256_T001;Zm00001d035256_T002;Zm00001d035256_T003;Zm00001d035256_T004	GO:0007275(multicellular organism development);GO:0031047(gene silencing by RNA);GO:0031047(gene silencing by RNA)	NA	NA	NA	Protein SUPPRESSOR OF GENE SILENCING 3 homolog	protein_coding	2.05409	1.38283	1.1451	0.215809	0.668458	0.459837	1.22644	1.23996	1.7868	0.650261	1.38406	0.643658	0.066349	0.048397	0.10994	0.0001	0.044066	0.076738	588	404	336	51	152	136	348	420	568	183	522	230	23	12	41	0	14	28
Zm00001d035310	chr6	20535180	20535940	+	Zm00001d035310	Zm00001d035310_T001	NA	NA	NA	NA		protein_coding	46.3838	38.8121	34.9193	14.2878	12.7706	10.3125	51.6575	32.8867	58.0998	3.39629	19.2483	24.2164	0.65116	1.34423	7.13087	0.0001	0.0001	0.0001	1511	1290	1167	382	329	347	1660	1269	2100	109	826	983	25	36	296	0	0	0
Zm00001d035456	chr6	26946233	26946694	-	Zm00001d035456	Zm00001d035456_T001	NA	NA	NA	NA		protein_coding	536.83	529.086	622.577	110.062	91.7063	96.5494	135.781	401.519	185.224	239.382	215.682	280.359	31.0126	33.2832	66.9003	89.8962	69.5521	43.6434	14240	14327	16953	2397	1923	2645	3554	12620	5454	6254	7540	9267	967	721	2259	3004	1933	1444
Zm00001d035542	chr6	31728237	31733132	-	Zm00001d035542	Zm00001d035542_T001;Zm00001d035542_T002	NA	NA	NA	NA	GPRP	protein_coding	1.63824	1.39548	1.66918	4.44369	3.94527	10.1651	17.0793	2.19787	27.392	0.0001	0.62637	0.184711	0.782339	0.772908	2.33423	1.2378	0.587846	1.70598	128	111	133	283	242	810	1301	202	2346	0	65	18	71	49	230	121	49	165
Zm00001d035605	chr6	36427345	36428954	-	MYB-transcription factor 21	Zm00001d035605_T001	GO:0003677(DNA binding);GO:0005634(nucleus);GO:0006355(regulation of transcription, DNA-templated);GO:0043565(sequence-specific DNA binding)	NA	NA	NA	Putative MYB DNA-binding domain superfamily protein	protein_coding	324.835	72.267	117.211	1655.65	1100.66	1387.35	193.462	117.175	336.713	52.7988	142.082	167.921	419.84	245.851	543.744	701.071	371.683	236.786	26317	5977	9748	110084	70475	116069	15463	11248	30279	4213	15169	16951	39970	16246	56059	71549	31539	23917
Zm00001d035783	chr6	48489279	48491246	+	Zm00001d035783	Zm00001d035783_T001	GO:0030001(metal ion transport);GO:0046872(metal ion binding)	NA	NA	NA	Heavy metal transport/detoxification superfamily protein	protein_coding	3.56877	0.368663	0.650498	6.68061	11.4797	11.0475	8.09895	3.52081	8.0511	6.8525	16.9419	16.195	23.8112	22.7667	53.4902	17.4546	21.0719	10.9513	292	31	55	448	741	932	653	341	730	552	1823	1648	2285	1517	5558	1796	1802	1115
Zm00001d035865	chr6	57504894	57506321	+	Zm00001d035865	Zm00001d035865_T001	GO:0016740(transferase activity);GO:0016747(transferase activity, transferring acyl groups other than amino-acyl groups)	NA	NA	NA	HXXXD-type acyl-transferase family protein	protein_coding	3.30416	4.48502	2.00295	2.35615	0.890726	3.05202	5.97121	2.7923	2.11896	0.96446	3.21008	2.62011	0.520751	0.62007	0.686226	0.161366	0.040213	0.506873	271	376	169	159	58	259	484	272	193	78	347	268	51	42	72	17	4	52
Zm00001d036014	chr6	66260191	66265850	+	Zm00001d036014	Zm00001d036014_T001	GO:0005515(protein binding);GO:0016874(ligase activity)	NA	NA	NA	E3 ubiquitin-protein ligase XBAT33	protein_coding	160.335	162.635	113.451	11.0361	36.4327	2.42854	8.68468	75.982	17.4425	114.079	152.509	208.779	2.46325	0.20915	3.69933	2.67343	11.0778	9.45896	17482	18102	12698	988	3140	274	935	9816	2111	12251	21913	28364	316	19	514	368	1266	1286
Zm00001d036139	chr6	74185522	74185890	+	Zm00001d036139	Zm00001d036139_T001	GO:0016020(membrane);GO:0016021(integral component of membrane)	NA	NA	NA		protein_coding	0.515425	0.17385	0.644968	48.555	67.8634	76.378	14.6918	2.73124	21.9092	0.218537	0.699174	1.10008	19.7703	14.3761	25.5366	62.5442	62.5104	97.776	11	4	15	845	1137	1672	308	69	516	5	20	30	493	249	689	1670	1388	2583
Zm00001d036206	chr6	77076826	77086653	-	Zm00001d036206	Zm00001d036206_T001;Zm00001d036206_T002;Zm00001d036206_T003;Zm00001d036206_T004;Zm00001d036206_T005;Zm00001d036206_T006;Zm00001d036206_T007;Zm00001d036206_T008	GO:0000166(nucleotide binding);GO:0003824(catalytic activity);GO:0003872(6-phosphofructokinase activity);GO:0005524(ATP binding);GO:0005737(cytoplasm);GO:0006002(fructose 6-phosphate metabolic process);GO:0006096(glycolytic process);GO:0008152(metabolic process);GO:0016301(kinase activity);GO:0016310(phosphorylation);GO:0016740(transferase activity);GO:0046872(metal ion binding);GO:0061615(glycol…	00010(Glycolysis / Gluconeogenesis);00030(Pentose phosphate pathway);00051(Fructose and mannose metabolism);00052(Galactose metabolism);03018(RNA degradation);03018(RNA degradation)	K00850	EC:2.7.1.11	ATP-dependent 6-phosphofructokinase 3	protein_coding	0.0001	0.159772	0.0001	0.0710697	0.026544	0.0216368	0.0001	0.0989528	0.0001	9.56415	10.8782	9.35717	0.991004	1.2335	1.89565	1.84816	1.86438	4.17382	0	26	0	10	4	4	0	19	0	1502	2285	1858	186	161	385	371	312	831
Zm00001d036216	chr6	77518951	77521071	+	Zm00001d036216	Zm00001d036216_T001	GO:0005515(protein binding);GO:0005634(nucleus);GO:0006511(ubiquitin-dependent protein catabolic process);GO:0007275(multicellular organism development);GO:0016567(protein ubiquitination);GO:0019005(SCF ubiquitin ligase complex);GO:0031146(SCF-dependent proteasomal ubiquitin-dependent protein catabolic process)	NA	NA	NA	F-box protein MAX2	protein_coding	0.560798	0.958955	0.63453	11.92	12.0794	15.7672	8.29902	3.20954	8.48416	0.03135	0.617913	0.260717	5.5574	5.3109	5.27504	0.55312	0.406212	0.851835	69	120	80	1192	1163	1983	998	464	1147	4	100	40	796	528	818	85	52	130
Zm00001d036221	chr6	77801669	77802163	+	Zm00001d036221	Zm00001d036221_T001	NA	NA	NA	NA		protein_coding	0.282422	0.129597	0.060328	9.23681	14.5795	19.7208	2.95676	1.01048	4.50425	0.0001	0.0001	0.039158	9.89481	1.67205	2.29633	0.0001	0.0001	0.29689	9	4	2	216	328	579	83	35	143	0	0	2	331	39	84	0	0	11
Zm00001d036298	chr6	82562696	82563229	+	AP2-EREBP-transcription factor 25	Zm00001d036298_T001	GO:0003677(DNA binding);GO:0003700(DNA-binding transcription factor activity);GO:0005634(nucleus);GO:0006351(transcription, DNA-templated);GO:0006355(regulation of transcription, DNA-templated)	NA	NA	NA	Putative AP2/EREBP transcription factor superfamily protein	protein_coding	1.95216	0.788955	1.60352	18.4009	22.8169	25.4251	25.1293	3.08313	24.3646	2.6926	9.26738	6.16127	254.216	86.6314	81.2436	45.3197	40.1067	126.464	60	25	51	464	553	806	761	112	830	82	375	236	9160	2167	3170	1751	1288	4835
Zm00001d036318	chr6	83982753	83999484	+	Zm00001d036318	Zm00001d036318_T001	GO:0004674(protein serine/threonine kinase activity);GO:0005886(plasma membrane);GO:0016020(membrane);GO:0016021(integral component of membrane);GO:0046777(protein autophosphorylation)	NA	NA	NA	ATP binding protein	protein_coding	2.97784	1.56116	1.25839	2.41179	4.63574	3.15469	6.19732	2.48138	5.73159	18.4263	18.583	17.4067	64.2703	44.8029	62.4562	21.8488	17.2611	25.9341	221	118	96	147	272	242	453	218	471	1344	1813	1606	5590	2705	5883	2037	1339	2393
Zm00001d036390	chr6	86551259	86555797	-	Zm00001d036390	Zm00001d036390_T001	GO:0008168(methyltransferase activity)	NA	NA	NA	CMV 1a interacting protein 1	protein_coding	0.077951	0.0001	0.0001	0.0001	0.0001	0.0001	0.0001	0.0001	0.0001	1.76439	2.46482	2.93376	8.33993	5.50898	8.93027	1.79203	1.98722	2.72048	11	0	0	0	0	0	0	0	0	228	426	479	1285	589	1490	296	273	445
Zm00001d036499	chr6	90643484	90644271	-	Zm00001d036499	Zm00001d036499_T001	NA	NA	NA	NA	oligopeptide transporter-like protein	protein_coding	0.0001	0.0001	0.0001	9.87736	15.9131	19.7288	0.0001	0.178017	0.0001	7.57989	8.86008	11.078	46.6621	21.3	27.3901	12.18	4.32815	8.36841	0	0	0	305	473	766	0	8	0	281	439	519	2060	653	1309	577	171	392
Zm00001d036506	chr6	90878266	90879517	+	Zm00001d036506	Zm00001d036506_T001	NA	NA	NA	NA	Lipid binding protein	protein_coding	0.0001	0.0001	0.0001	0.0001	0.0001	0.0001	0.123734	0.0001	0.0001	5.78027	6.41967	7.42742	22.8192	14.3069	16.2731	2.43847	2.41586	3.2988	0	0	0	0	0	0	8	0	0	351	521	570	1649	718	1274	189	156	253
Zm00001d036617	chr6	94836282	94837115	+	Zm00001d036617	Zm00001d036617_T001	GO:0005634(nucleus);GO:0009299(mRNA transcription);GO:0009416(response to light stimulus)	NA	NA	NA	Protein LIGHT-DEPENDENT SHORT HYPOCOTYLS 5	protein_coding	8.84861	0.25067	0.419094	1.77337	4.33229	3.66998	0.490517	0.10693	0.571955	5.53965	12.7362	11.8301	1.53248	1.28531	0.48662	8.4279	8.16828	0.062534	424	13	21	70	164	182	24	7	31	262	804	706	87	51	30	509	410	4
Zm00001d036680	chr6	97452879	97455139	-	Zm00001d036680	Zm00001d036680_T001	GO:0019013(viral nucleocapsid)	NA	NA	NA	Heterogeneous nuclear ribonucleoprotein U-like protein 1	protein_coding	0.036565	0.034929	0.070736	0.176312	0.193831	0.534793	0.229466	0.092363	0.314582	0.993404	2.24139	1.21582	3.67196	3.01214	4.21309	1.53662	1.2006	1.03884	4	4	8	15	16	57	24	12	36	101	304	156	444	253	552	200	130	134
Zm00001d036788	chr6	100889664	100893620	-	Zm00001d036788	Zm00001d036788_T001;Zm00001d036788_T002;Zm00001d036788_T003;Zm00001d036788_T004	GO:0004252(serine-type endopeptidase activity);GO:0006508(proteolysis);GO:0008233(peptidase activity);GO:0008236(serine-type peptidase activity);GO:0016787(hydrolase activity);GO:0016787(hydrolase activity)	NA	NA	NA	Subtilisin-like protease SBT4.4	protein_coding	8.8219	22.5141	25.0861	2.89206	3.58044	4.11876	0.747155	20.587	0.966914	4.92245	3.55454	3.47522	1.32313	1.07597	2.09258	0.457919	0.416855	0.558164	1527	3978	4456	411	491	738	128	4221	186	840	813	750	271	153	462	100	76	121
Zm00001d036894	chr6	105839573	105842396	+	heme oxygenase2	Zm00001d036894_T001	GO:0004392(heme oxygenase (decyclizing) activity);GO:0006788(heme oxidation);GO:0016491(oxidoreductase activity);GO:0055114(oxidation-reduction process)	NA	NA	NA	heme oxygenase2	protein_coding	3.31216	3.71608	4.72556	15.1006	24.7887	21.0385	10.6786	5.33629	11.0868	29.3335	34.1807	48.3908	123.842	60.202	105.025	105.488	70.7083	116.738	235	269	344	877	1386	1537	746	448	871	2044	3187	4266	10295	3474	9455	9400	5239	10296
Zm00001d036950	chr6	107185515	107185985	+	Zm00001d036950	Zm00001d036950_T001	GO:0016020(membrane);GO:0016021(integral component of membrane)	NA	NA	NA		protein_coding	22.9621	5.82332	10.8321	72.885	86.4312	36.6784	255.187	52.3875	231.841	30.8439	29.9072	54.1297	288.287	202.408	634.613	447.408	397.636	535.248	621	161	301	1618	1848	1025	6809	1679	6960	822	1066	1824	9162	4465	21840	15242	11264	18047
Zm00001d036985	chr6	108317523	108319096	-	Zm00001d036985	Zm00001d036985_T001	GO:0003735(structural constituent of ribosome);GO:0005840(ribosome);GO:0006412(translation)	03010(Ribosome)	K02974	NA	40S ribosomal protein S24	protein_coding	17.044	32.9622	11.6878	5.3044	6.48603	5.46332	17.5354	24.9042	12.2676	2.91491	6.74858	2.32253	1.95803	1.58283	1.97157	1.58464	3.36531	2.94919	800	1579	563	205	241	265	812	1385	639	135	418	136	108	61	118	94	166	173
Zm00001d037009	chr6	108903771	108928531	+	Zm00001d037009	Zm00001d037009_T001	GO:0016491(oxidoreductase activity);GO:0050660(flavin adenine dinucleotide binding);GO:0055114(oxidation-reduction process);GO:0071949(FAD binding)	NA	NA	NA	FAD-binding Berberine family protein	protein_coding	7.55972	4.47192	8.16763	1.67343	1.34049	2.56149	9.51724	5.17987	12.8666	5.56895	10.6999	11.9755	0.640728	0.507388	1.03045	0.960025	0.679567	3.08156	917	554	1017	167	129	321	1139	744	1732	665	1709	1809	92	51	159	147	87	466
Zm00001d037057	chr6	110845121	110851267	+	Zm00001d037057	Zm00001d037057_T001	GO:0003333(amino acid transmembrane transport);GO:0005774(vacuolar membrane);GO:0005886(plasma membrane);GO:0015171(amino acid transmembrane transporter activity);GO:0016020(membrane);GO:0016021(integral component of membrane)	NA	NA	NA	Transmembrane amino acid transporter family protein	protein_coding	2.93846	0.109472	0.0001	46.7363	74.1046	47.3047	2.23907	1.16981	1.25104	2.15921	3.0496	5.31157	154.788	87.8385	101.924	9.46859	8.1	26.7948	297	12	0	3872	5912	4931	223	140	141	215	406	669	18360	7232	13093	1204	857	3372
Zm00001d037060	chr6	110983102	110984867	+	Zm00001d037060	Zm00001d037060_T001;Zm00001d037060_T002	NA	NA	NA	NA	DNAJ heat shock N-terminal domain-containing protein	protein_coding	218.269	137.433	235.333	2.28032	3.36805	6.24057	277.833	145.075	318.223	137.235	238.099	249.011	14.3114	21.975	48.1719	6.96866	6.98954	50.0531	18899	12148	20916	163	231	559	23734	14884	30584	11704	27167	26864	1457	1553	5309	761	635	5404
Zm00001d037205	chr6	115761948	115762958	+	Zm00001d037205	Zm00001d037205_T001	NA	NA	NA	NA	Protein EXORDIUM	protein_coding	1.81048	1.19795	1.37013	13.9122	12.3411	57.3207	1.39971	2.88396	1.94047	1.70884	3.05145	1.32584	8.53936	13.9025	10.3324	10.9392	13.3278	3.27737	106	71	82	663	567	3437	81	199	126	98	234	96	583	659	764	800	811	238
Zm00001d037215	chr6	116217062	116229724	-	Zm00001d037215	Zm00001d037215_T001;Zm00001d037215_T002;Zm00001d037215_T003;Zm00001d037215_T004;Zm00001d037215_T005;Zm00001d037215_T006;Zm00001d037215_T007;Zm00001d037215_T008;Zm00001d037215_T009;Zm00001d037215_T010;Zm00001d037215_T011	GO:0005622(intracellular);GO:0009055(electron transfer activity);GO:0015035(protein disulfide oxidoreductase activity);GO:0022900(electron transport chain);GO:0035556(intracellular signal transduction);GO:0045454(cell redox homeostasis);GO:0055114(oxidation-reduction process);GO:0055114(oxidation-reduction process)	NA	NA	NA	electron carriers;protein disulfide oxidoreductases	protein_coding	0.0001	0.249078	0.163909	0.415365	1.13638	0.409073	2.31435	0.408781	1.57258	0.307865	0.539382	0.251018	1.27425	1.49728	1.42396	0.158308	0.0975004	0.305017	0	44	30	59	156	74	396	85	303	53	124	55	261	212	316	35	18	66
Zm00001d037229	chr6	116920317	116926344	+	Zm00001d037229	Zm00001d037229_T001	GO:0003333(amino acid transmembrane transport);GO:0005886(plasma membrane);GO:0015171(amino acid transmembrane transporter activity);GO:0016020(membrane);GO:0016021(integral component of membrane)	NA	K15015	NA	Transmembrane amino acid transporter family protein	protein_coding	0.128386	0.174854	0.01651	0.084777	0.272328	0.216137	0.752402	0.377008	0.951244	0.086327	0.329167	0.213939	0.997837	0.900332	1.18317	0.426177	0.439007	5.46145	43	59	6	23	71	74	244	147	347	28	143	88	385	241	494	177	151	2234
Zm00001d037327	chr6	121369894	121371711	+	C2C2-CO-like-transcription factor 10	Zm00001d037327_T001	GO:0005515(protein binding);GO:0005634(nucleus);GO:0006355(regulation of transcription, DNA-templated);GO:0008270(zinc ion binding)	NA	NA	NA	Zinc finger protein CONSTANS-LIKE 7	protein_coding	6.49854	18.2808	12.6354	8.24342	6.34102	12.0556	12.5856	40.9765	20.6565	4.47326	6.31512	5.35846	18.5982	45.8454	59.6879	0.145188	0.128186	0.0001	626	1796	1249	652	483	1199	1195	4672	2207	424	801	643	2104	3599	7310	18	13	0
Zm00001d037406	chr6	124644010	124645197	-	Zm00001d037406	Zm00001d037406_T001	GO:0015238(GO_0015238);GO:0015297(antiporter activity);GO:0016020(membrane);GO:0022857(transmembrane transporter activity);GO:0042908(xenobiotic transport);GO:0042910(xenobiotic transmembrane transporter activity);GO:0055085(transmembrane transport)	NA	NA	NA	Protein TRANSPARENT TESTA 12	protein_coding	0.0001	0.0001	0.0001	0.0001	0.0001	0.0001	0.0001	0.0001	0.0001	1.52292	1.62119	1.48106	6.25974	5.57522	8.80168	2.0906	2.28387	2.56705	0	0	0	0	0	0	0	0	0	78	111	96	380	235	578	136	124	166
Zm00001d037413	chr6	124872285	124877763	-	Zm00001d037413	Zm00001d037413_T001;Zm00001d037413_T002;Zm00001d037413_T003;Zm00001d037413_T004;Zm00001d037413_T005;Zm00001d037413_T006;Zm00001d037413_T007	GO:0000226(microtubule cytoskeleton organization);GO:0000911(cytokinesis by cell plate formation);GO:0005737(cytoplasm);GO:0005819(spindle);GO:0008017(microtubule binding);GO:0008017(microtubule binding)	NA	K16732	NA	65-kDa microtubule-associated protein 1	protein_coding	1.57142	0.990898	0.29222	1.15984	1.59485	1.4811	2.20717	1.31423	1.95588	1.0003	1.8942	1.16097	0.274859	0.455269	0.947848	0.234429	0.434611	0.149558	237	153	46	145	190	233	328	234	327	148	379	219	49	58	182	45	69	29
Zm00001d037550	chr6	129101873	129103497	+	peroxidase 5	Zm00001d037550_T001	GO:0004601(peroxidase activity);GO:0005576(extracellular region);GO:0006979(response to oxidative stress);GO:0009505(plant-type cell wall);GO:0009506(plasmodesma);GO:0016491(oxidoreductase activity);GO:0020037(heme binding);GO:0042744(hydrogen peroxide catabolic process);GO:0046872(metal ion binding);GO:0055114(oxidation-reduction process);GO:0098869(cellular oxidant detoxification)	00940(Phenylpropanoid biosynthesis)	K00430	EC:1.11.1.7	peroxidase 5	protein_coding	80.6058	69.5801	51.1247	63.6574	56.6581	38.4017	98.3343	99.9606	102.936	49.7088	116.033	106.955	325.253	278.178	365.72	1.51752	2.49737	51.3738	6364	5608	4144	4125	3536	3131	7660	9351	9021	3865	12072	10521	30175	17913	36743	151	207	5057
Zm00001d037574	chr6	130069348	130069875	-	Zm00001d037574	Zm00001d037574_T001	GO:0003697(single-stranded DNA binding);GO:0003727(single-stranded RNA binding);GO:0003899(DNA-directed 5'-3' RNA polymerase activity);GO:0006351(transcription, DNA-templated)	NA	K16253	NA	DNA-directed RNA polymerase V subunit 7	protein_coding	8.03329	4.37607	3.39815	15.7633	26.1563	39.83	22.7682	10.7725	14.5238	1.4009	5.84316	7.21682	16.1806	11.5482	9.62145	1.71321	3.09516	7.03455	244	136	106	393	627	1247	681	387	489	42	234	273	577	286	372	66	99	266
Zm00001d037609	chr6	131653518	131657066	-	Zm00001d037609	Zm00001d037609_T001;Zm00001d037609_T002;Zm00001d037609_T003;Zm00001d037609_T004;Zm00001d037609_T005;Zm00001d037609_T006	GO:0016620(oxidoreductase activity, acting on the aldehyde or oxo group of donors, NAD or NADP as acceptor);GO:0055114(oxidation-reduction process);GO:0055114(oxidation-reduction process)	NA	NA	NA	GDSL esterase/lipase	protein_coding	0.554474	0.352092	0.257171	1.14777	1.08588	1.19616	1.13615	0.666289	2.08751	3.09766	5.99534	4.4826	11.9041	8.20975	20.2918	3.79332	4.60874	6.78221	88	57	42	149	136	195	177	125	366	483	1249	884	2210	1059	4079	757	764	1336
Zm00001d037650	chr6	132828573	132836981	-	Zm00001d037650	Zm00001d037650_T001;Zm00001d037650_T002;Zm00001d037650_T005	GO:0000166(nucleotide binding);GO:0006952(defense response);GO:0016020(membrane);GO:0016021(integral component of membrane);GO:0043531(ADP binding);GO:0050661(NADP binding);GO:0050661(NADP binding)	NA	NA	NA		protein_coding	0.574095	0.600213	0.249506	1.01642	1.67462	1.51524	0.886529	0.60231	1.93094	0.679025	9.76367	8.18955	15.6063	14.7908	17.7621	6.1572	3.07032	2.00776	185	197	83	268	426	503	281	230	689	215	4133	3278	5891	3875	7260	2492	1034	804
Zm00001d037687	chr6	133982114	133986795	+	derlin3	Zm00001d037687_T001	GO:0000839(Hrd1p ubiquitin ligase ERAD-L complex);GO:0005783(endoplasmic reticulum);GO:0005789(endoplasmic reticulum membrane);GO:0016020(membrane);GO:0016021(integral component of membrane);GO:0030176(integral component of endoplasmic reticulum membrane);GO:0030433(ubiquitin-dependent ERAD pathway);GO:0030968(endoplasmic reticulum unfolded protein response);GO:0051787(misfolded protein binding);…	04141(Protein processing in endoplasmic reticulum)	K13989	NA	derlin3	protein_coding	0.0001	0.049294	0.0001	6.84648	8.82174	15.2863	1.56492	0.177123	0.844055	0.0001	0.0001	0.0001	4.27446	2.34809	3.93194	0.167478	0.122422	14.2938	0	4	0	402	499	1130	111	16	68	0	0	0	360	138	358	16	10	1275
Zm00001d037748	chr6	136273610	136278904	+	Zm00001d037748	Zm00001d037748_T001;Zm00001d037748_T002	GO:0005623(cell);GO:0045454(cell redox homeostasis);GO:0045454(cell redox homeostasis)	NA	NA	NA	Thioredoxin-like 2-2 chloroplastic	protein_coding	30.9266	32.2945	36.1758	5.45111	5.56247	8.30026	11.422	23.7411	12.5773	42.0063	55.6699	56.7764	14.9596	10.9601	25.5191	73.3125	57.117	33.8489	2227	2374	2674	323	317	618	812	2026	1006	2979	5282	5094	1266	644	2339	6650	4308	3039
Zm00001d037768	chr6	136796927	136798665	-	Zm00001d037768	Zm00001d037768_T001	GO:0004795(threonine synthase activity);GO:0005737(cytoplasm);GO:0006520(cellular amino acid metabolic process);GO:0030170(pyridoxal phosphate binding)	NA	NA	NA	Threonine synthase 1 chloroplastic	protein_coding	0.077674	0.0001	0.0001	0.0001	0.0001	0.040384	0.202682	0.031314	0.067191	0.14785	0.608064	0.464295	3.08405	0.771771	3.26875	2.33251	4.33921	1.2085	7	0	0	0	0	4	18	4	7	13	72	52	323	56	370	262	404	134
Zm00001d037778	chr6	137348656	137351223	-	Zm00001d037778	Zm00001d037778_T001;Zm00001d037778_T002	GO:0004343(glucosamine 6-phosphate N-acetyltransferase activity);GO:0005783(endoplasmic reticulum);GO:0005793(endoplasmic reticulum-Golgi intermediate compartment);GO:0005794(Golgi apparatus);GO:0006048(UDP-N-acetylglucosamine biosynthetic process);GO:0008080(N-acetyltransferase activity);GO:0016740(transferase activity);GO:0016746(transferase activity, transferring acyl groups);GO:0048029(monosa…	NA	NA	NA	Acyl-CoA N-acyltransferases (NAT) superfamily protein	protein_coding	70.7682	93.2663	103.414	9.42675	8.71121	15.9196	51.2846	81.6142	49.1145	10.4022	13.4136	14.3863	3.33072	1.28207	4.77538	6.0931	7.32615	7.50634	3462	4659	5194	380	338	806	2476	4731	2667	502	866	878	193	52	298	377	376	458
Zm00001d037816	chr6	138740453	138748540	-	Zm00001d037816	Zm00001d037816_T001;Zm00001d037816_T002	GO:0005886(plasma membrane);GO:0006873(cellular ion homeostasis);GO:0008308(voltage-gated anion channel activity);GO:0016020(membrane);GO:0016021(integral component of membrane);GO:0055085(transmembrane transport);GO:0055085(transmembrane transport)	NA	NA	NA	C4-dicarboxylate transporter/malic acid transport protein isoform 1%3B C4-dicarboxylate transporter/malic acid transport protein isoform 2	protein_coding	0.332818	0.765667	0.18812	1.33085	0.237799	3.22733	0.245228	0.71392	0.0432212	0.803253	0.465456	0.298921	0.31885	0.0001	0.108975	0.272524	0.357482	20.3645	52	122	30	170	30	517	38	132	8	123	96	58	59	0	22	54	59	3938
Zm00001d037916	chr6	141931015	141933513	+	thiamin diphosphokinase2	Zm00001d037916_T001	GO:0000166(nucleotide binding);GO:0004788(thiamine diphosphokinase activity);GO:0005524(ATP binding);GO:0006772(thiamine metabolic process);GO:0009229(thiamine diphosphate biosynthetic process);GO:0016301(kinase activity);GO:0016310(phosphorylation);GO:0016740(transferase activity);GO:0030975(thiamine binding)	NA	NA	NA	thiamin diphosphokinase2	protein_coding	0.19486	0.628116	0.439327	2.19284	2.96864	2.87641	2.45502	1.31131	4.55532	1.5761	2.35499	1.85286	7.33809	7.97234	10.2078	0.634317	0.33573	0.403631	11	37	26	102	133	168	137	88	286	88	175	131	487	367	733	46	20	29
Zm00001d037932	chr6	142512806	142521198	+	Zm00001d037932	Zm00001d037932_T001;Zm00001d037932_T002;Zm00001d037932_T003;Zm00001d037932_T004;Zm00001d037932_T005;Zm00001d037932_T006;Zm00001d037932_T007;Zm00001d037932_T008;Zm00001d037932_T009;Zm00001d037932_T014;Zm00001d037932_T016;Zm00001d037932_T020;Zm00001d037932_T022;Zm00001d037932_T023	GO:0005515(protein binding);GO:0007165(signal transduction);GO:0007165(signal transduction)	NA	NA	NA	Transducin/WD40 repeat-like superfamily protein	protein_coding	0.986138	1.42558	0.744491	0.34133	0.361807	0.441516	0.543481	1.18512	0.511529	5.73858	6.95805	7.02134	0.0542912	0.0826324	0.167814	0.0195125	0.118636	0.131368	302	446	235	87	88	141	164	430	174	1728	2804	2674	20	21	66	8	38	51
Zm00001d037969	chr6	143835888	143836243	+	Zm00001d037969	Zm00001d037969_T001	GO:0004867(serine-type endopeptidase inhibitor activity);GO:0009611(response to wounding);GO:0010951(negative regulation of endopeptidase activity)	NA	NA	NA	Inhibitor I family protein; Potato inhibitor I family	protein_coding	7.85323	1.09078	0.358408	0.224136	0.386261	0.145916	61.9018	24.6799	55.204	2.36452	58.4303	55.9121	4.47302	4.01159	6.18748	212.596	513.654	31.3825	161	23	8	4	7	4	1249	598	1253	48	1574	1424	108	67	161	5475	10997	800
Zm00001d037972	chr6	143911485	143913119	+	Zm00001d037972	Zm00001d037972_T001	GO:0002181(cytoplasmic translation);GO:0003735(structural constituent of ribosome);GO:0005840(ribosome);GO:0006412(translation);GO:0022625(cytosolic large ribosomal subunit)	03010(Ribosome)	K02905	NA	60S ribosomal protein L29-1	protein_coding	43.0063	70.6821	26.4252	10.6668	13.8417	14.7163	83.1249	72.0189	36.6078	10.0466	23.8103	13.0007	3.76959	5.37807	7.53391	5.19053	10.5768	13.8189	1608	2697	1014	328	409	569	3066	3190	1519	370	1173	606	166	164	359	245	415	644
Zm00001d038003	chr6	144813893	144814871	-	Zm00001d038003	Zm00001d038003_T001	NA	NA	NA	NA		protein_coding	197.336	210.267	161.231	2308.43	2952.17	3806.89	871.43	625.313	871.894	36.0094	30.2582	58.6541	1133.09	665.733	993.873	19.701	13.0059	196.521	9733	10587	8163	93441	115077	193894	42403	36541	47732	1750	1967	3605	65672	26781	62380	1225	672	12085
Zm00001d038020	chr6	145388523	145391962	+	Zm00001d038020	Zm00001d038020_T001;Zm00001d038020_T002	GO:0004672(protein kinase activity);GO:0005524(ATP binding);GO:0006468(protein phosphorylation);GO:0016020(membrane);GO:0016021(integral component of membrane);GO:0016301(kinase activity);GO:0016310(phosphorylation);GO:0016310(phosphorylation)	NA	NA	NA	Putative leucine-rich repeat transmembrane protein kinase family protein	protein_coding	13.0633	47.2543	15.178	5.08684	10.3767	11.1698	9.05347	105.533	9.48898	4.48558	8.72717	8.16726	4.31629	2.78772	2.98447	3.56178	2.52273	2.0019	1672	6172	1994	535	1050	1477	1144	15996	1348	566	1472	1303	650	292	487	575	339	320
Zm00001d038181	chr6	150745127	150748423	-	Zm00001d038181	Zm00001d038181_T001	GO:0005886(plasma membrane);GO:0015333(peptide:proton symporter activity);GO:0016020(membrane);GO:0016021(integral component of membrane);GO:0022857(transmembrane transporter activity);GO:0035672(oligopeptide transmembrane transport);GO:0035673(oligopeptide transmembrane transporter activity);GO:0042886(amide transport);GO:0055085(transmembrane transport);GO:1902600(proton transmembrane transport…	NA	NA	NA	Protein NRT1/ PTR FAMILY 3.1	protein_coding	1.10024	1.79689	2.04994	13.6471	13.8122	11.2236	2.80853	1.02483	0.679666	0.583623	0.316666	0.458373	2.50713	0.892814	2.69137	70.2785	114.24	366.924	140	234	268	1426	1389	1475	353	155	96	74	54	73	375	93	436	11265	15225	58206
Zm00001d038274	chr6	153040258	153042534	+	Zm00001d038274	Zm00001d038274_T001;Zm00001d038274_T002	GO:0005515(protein binding);GO:0005515(protein binding)	NA	NA	NA	Tetratricopeptide repeat (TPR)-like superfamily protein	protein_coding	93.7872	58.8395	118.583	67.7099	52.6599	79.471	130.437	93.4809	128.946	56.2916	79.4399	104.887	20.4159	21.5444	35.4753	1.38549	0.770691	4.01898	11777	7544	15286	6979	5227	10306	16160	13909	17973	6963	13146	16412	3013	2207	5670	220	102	630
Zm00001d038284	chr6	153339730	153340491	-	OVATE-transcription factor 27	Zm00001d038284_T001	GO:0005634(nucleus);GO:0045892(negative regulation of transcription, DNA-templated)	NA	NA	NA	Transcription repressor OFP13	protein_coding	68.0879	120.876	113.279	13.467	5.18431	8.11186	17.3786	63.8899	18.4552	40.5608	20.1975	19.1335	3.19421	3.50362	0.678128	2.09746	1.33377	2.00831	2979	5399	5088	484	180	367	751	3312	897	1748	1165	1044	165	126	38	116	62	110
Zm00001d038340	chr6	154857022	154859451	+	Zm00001d038340	Zm00001d038340_T001	GO:0016020(membrane);GO:0016021(integral component of membrane);GO:0016740(transferase activity)	NA	NA	NA	Phosphoribosylanthranilate transferase	protein_coding	1.26873	0.804154	0.727658	0.614809	0.509534	1.41134	1.42584	0.690513	1.60545	0.623533	1.55659	0.916239	0.0001	0.031635	0.126912	0.0001	0.076915	0.086462	178	115	105	71	57	204	197	115	249	86	287	160	0	4	23	0	12	16
Zm00001d038459	chr6	157664931	157677466	+	Zm00001d038459	Zm00001d038459_T001;Zm00001d038459_T002;Zm00001d038459_T003	GO:0005622(intracellular);GO:0006886(intracellular protein transport);GO:0006886(intracellular protein transport)	NA	NA	NA	Putative VHS/GAT domain containing family protein	protein_coding	1.10505	1.0784	0.605129	5.98717	9.77547	3.48861	3.99429	1.81748	5.70896	4.98426	4.50863	5.01066	20.6066	13.2597	18.5634	0.494215	1.09544	0.750192	313	313	177	1389	2184	1019	1114	610	1792	1388	1679	1765	6842	3056	6675	177	325	265
Zm00001d038491	chr6	158530754	158533955	+	Zm00001d038491	Zm00001d038491_T001;Zm00001d038491_T002;Zm00001d038491_T003	GO:0004059(aralkylamine N-acetyltransferase activity);GO:0005634(nucleus);GO:0008080(N-acetyltransferase activity);GO:0009507(chloroplast);GO:0016740(transferase activity);GO:0030187(melatonin biosynthetic process);GO:0030187(melatonin biosynthetic process)	NA	NA	NA	Acetyltransferase NSI	protein_coding	82.4971	87.507	105.162	30.6554	41.6044	41.4338	42.8174	76.8072	53.4598	33.4189	36.1856	35.4148	15.7414	11.959	22.3035	14.4083	12.3114	11.659	7101	7689	9292	2166	2832	3684	3638	7834	5108	2834	4105	3800	1594	841	2445	1564	1111	1253
Zm00001d038589	chr6	160579671	160585683	-	Zm00001d038589	Zm00001d038589_T001;Zm00001d038589_T002;Zm00001d038589_T003;Zm00001d038589_T004;Zm00001d038589_T005;Zm00001d038589_T006;Zm00001d038589_T007;Zm00001d038589_T008	GO:0004252(serine-type endopeptidase activity);GO:0004784(superoxide dismutase activity);GO:0005777(peroxisome);GO:0006508(proteolysis);GO:0008233(peptidase activity);GO:0016485(protein processing);GO:0019430(removal of superoxide radicals);GO:0055114(oxidation-reduction process);GO:0055114(oxidation-reduction process)	NA	K23012	EC:3.4.21.-	Glyoxysomal processing protease glyoxysomal	protein_coding	3.76355	4.16033	3.03125	6.63275	7.9387	11.0175	8.28456	4.57685	7.77176	1.20345	1.68587	2.53822	4.28293	3.20847	5.11188	1.13844	1.4044	2.06503	912	1030	755	1319	1520	2756	1979	1315	2089	288	539	767	1220	635	1576	350	358	628
Zm00001d038606	chr6	160891700	160892734	-	Zm00001d038606	Zm00001d038606_T001	GO:0009507(chloroplast)	NA	NA	NA	uncharacterized protein [Source:UniProtKB/TrEMBL;Acc:B6SZF2]	protein_coding	167.509	208.155	156.088	66.2594	56.6674	95.8408	20.3467	189.609	32.4833	21.8389	28.6402	35.6031	11.7573	9.49734	16.1235	8.64691	8.237	19.7492	9955	12628	9522	3232	2662	5882	1193	13351	2143	1279	2243	2637	822	461	1220	648	513	1464
Zm00001d038642	chr6	161549380	161551931	+	Zm00001d038642	Zm00001d038642_T001	GO:0005515(protein binding);GO:0009658(chloroplast organization);GO:0010438(cellular response to sulfur starvation);GO:0010439(regulation of glucosinolate biosynthetic process)	NA	NA	NA	Protein SULFUR DEFICIENCY-INDUCED 1	protein_coding	8.54521	3.13232	1.76979	12.8821	9.66934	13.1776	2.01744	9.2659	1.8066	2.86208	6.00252	4.87361	61.9839	52.1849	36.4604	15.3517	39.6459	1.12251	700	262	149	866	626	1115	163	899	165	231	648	498	5964	3485	3799	1584	3400	115
Zm00001d038644	chr6	161622743	161636125	+	Zm00001d038644	Zm00001d038644_T001;Zm00001d038644_T002;Zm00001d038644_T003;Zm00001d038644_T004;Zm00001d038644_T005;Zm00001d038644_T006;Zm00001d038644_T007;Zm00001d038644_T008;Zm00001d038644_T009;Zm00001d038644_T011;Zm00001d038644_T013;Zm00001d038644_T014;Zm00001d038644_T016;Zm00001d038644_T018;Zm00001d038644_T019;Zm00001d038644_T020;Zm00001d038644_T022;Zm00001d038644_T023;Zm00001d038644_T024;Zm00001d038644_T026…	GO:0003729(mRNA binding);GO:0006355(regulation of transcription, DNA-templated);GO:0006357(regulation of transcription by RNA polymerase II);GO:0006368(transcription elongation from RNA polymerase II promoter);GO:0016020(membrane);GO:0016021(integral component of membrane);GO:0032044(DSIF complex);GO:0032784(regulation of DNA-templated transcription, elongation);GO:0032784(regulation of DNA-templ…	NA	NA	NA	Protein RNA-directed DNA methylation 3	protein_coding	4.33271	2.75838	3.54828	9.50412	12.7322	14.8111	8.98771	5.38081	5.10491	1.09252	2.20219	2.20775	5.11865	4.54837	5.84505	1.82648	1.53301	1.79696	1460	949	1229	2630	3391	5152	2988	2148	1911	364	978	928	2027	1251	2506	776	542	755
Zm00001d038651	chr6	161809629	161813487	+	Zm00001d038651	Zm00001d038651_T001;Zm00001d038651_T002;Zm00001d038651_T003;Zm00001d038651_T004	GO:0030246(carbohydrate binding);GO:0030246(carbohydrate binding)	NA	NA	NA	Jacalin-related lectin 3	protein_coding	0.751258	0.740674	0.161389	0.0826953	0.096548	0.16306	14.3439	1.85089	13.1616	5.05369	12.8928	8.8457	2.21328	0.4561	3.77916	26.1687	42.9668	19.129	110	110	25	10	12	25	2058	321	2124	725	2471	1604	379	55	700	4793	6543	3468
Zm00001d038718	chr6	163324435	163325813	-	hemoglobin2	Zm00001d038718_T001;Zm00001d038718_T002;Zm00001d038718_T003	GO:0005344(oxygen carrier activity);GO:0015671(oxygen transport);GO:0019825(oxygen binding);GO:0020037(heme binding);GO:0046872(metal ion binding);GO:0046872(metal ion binding)	NA	K21894	NA	hemoglobin2	protein_coding	58.998	35.687	31.0875	3.75564	22.8793	36.4486	26.0998	7.7878	6.65834	223.402	533.263	366.58	0.608711	0.638242	3.73493	135.854	195.384	32.3739	3673	2268	1987	192	1126	2344	1604	576	461	13695	43737	28429	46	33	297	10653	12738	2513
Zm00001d038720	chr6	163334324	163340060	-	Zm00001d038720	Zm00001d038720_T001;Zm00001d038720_T002;Zm00001d038720_T003;Zm00001d038720_T004;Zm00001d038720_T005;Zm00001d038720_T006;Zm00001d038720_T007;Zm00001d038720_T008;Zm00001d038720_T009;Zm00001d038720_T010;Zm00001d038720_T011	GO:0016020(membrane);GO:0016021(integral component of membrane);GO:0016021(integral component of membrane)	NA	NA	NA		protein_coding	1.96072	1.70837	1.96649	2.87912	5.14086	5.29106	2.37399	2.26157	2.36093	0.289643	0.432181	0.416992	1.40643	1.1891	1.46227	0.0707914	0.131309	0.112783	651	579	670	780	1342	1804	775	886	866	96	189	173	547	321	614	31	47	48
Zm00001d038728	chr6	163411334	163420722	+	trehalose-6-phosphate synthase12	Zm00001d038728_T001;Zm00001d038728_T002;Zm00001d038728_T003;Zm00001d038728_T004;Zm00001d038728_T005;Zm00001d038728_T006;Zm00001d038728_T007;Zm00001d038728_T008;Zm00001d038728_T009;Zm00001d038728_T010;Zm00001d038728_T011;Zm00001d038728_T012;Zm00001d038728_T013;Zm00001d038728_T014;Zm00001d038728_T015;Zm00001d038728_T016;Zm00001d038728_T017;Zm00001d038728_T018;Zm00001d038728_T019;Zm00001d038728_T020…	GO:0003824(catalytic activity);GO:0003825(alpha,alpha-trehalose-phosphate synthase (UDP-forming) activity);GO:0005737(cytoplasm);GO:0005829(cytosol);GO:0005992(trehalose biosynthetic process);GO:0009793(embryo development ending in seed dormancy);GO:0009832(plant-type cell wall biogenesis);GO:0010182(sugar mediated signaling pathway);GO:0051301(cell division);GO:0070413(trehalose metabolism in re…	NA	NA	NA	trehalose-6-phosphate synthase12	protein_coding	4.17129	1.67018	2.70398	1.23783	0.830762	2.03035	1.48655	0.776356	1.37694	3.78091	7.69112	5.45437	0.542808	0.296445	1.00742	19.3052	14.4603	2.88324	1797	735	1195	440	285	905	633	397	662	1603	4359	2924	275	105	553	10455	6514	1548
Zm00001d038751	chr6	163857513	163860102	+	Zm00001d038751	Zm00001d038751_T001	GO:0005506(iron ion binding);GO:0009055(electron transfer activity);GO:0022900(electron transport chain)	NA	NA	NA	DNAJ heat shock N-terminal domain-containing protein	protein_coding	1.71077	0.491781	0.554016	102.767	116.126	141.693	79.562	13.5998	60.0638	0.464547	1.15027	0.671708	63.6617	18.889	48.1251	91.8789	81.7679	241.972	132	39	44	6494	7067	11267	6044	1241	5134	36	117	65	5760	1187	4716	8912	6595	23228
Zm00001d038801	chr6	164734361	164736397	-	C2C2-GATA-transcription factor 25	Zm00001d038801_T001;Zm00001d038801_T002	GO:0003700(DNA-binding transcription factor activity);GO:0005634(nucleus);GO:0006355(regulation of transcription, DNA-templated);GO:0008270(zinc ion binding);GO:0030154(cell differentiation);GO:0043565(sequence-specific DNA binding);GO:0046872(metal ion binding);GO:0046872(metal ion binding)	NA	NA	NA	GATA transcription factor 12	protein_coding	1.55516	2.03809	1.35938	0.865746	1.60734	0.809894	1.03595	1.77314	2.98317	0.950267	0.63179	0.716098	0.254746	0.095746	0.451029	0.30627	0.268886	0.088948	152	203	136	70	124	82	100	205	322	91	81	87	30	8	56	38	28	11
Zm00001d038806	chr6	164808309	164812048	+	heat-shock protein 101	Zm00001d038806_T001;Zm00001d038806_T004	GO:0000166(nucleotide binding);GO:0005524(ATP binding);GO:0019538(protein metabolic process);GO:0034605(cellular response to heat);GO:0034605(cellular response to heat)	NA	K03695	NA	Chaperone protein ClpB1	protein_coding	0.204988	0.0001	0.0589316	5.42473	9.11321	15.1249	4.38142	0.131029	1.04846	0.198966	0.135923	0.0885863	3.88903	0.783227	1.92137	8.34437	18.8316	212.017	39	0	12	829	1341	2907	805	29	218	37	34	21	851	119	456	1957	3670	49175
Zm00001d038843	chr6	165655159	165656827	+	WRKY-transcription factor 82	Zm00001d038843_T001	GO:0003677(DNA binding);GO:0003700(DNA-binding transcription factor activity);GO:0005634(nucleus);GO:0006355(regulation of transcription, DNA-templated);GO:0043565(sequence-specific DNA binding)	NA	NA	NA	Putative WRKY DNA-binding domain superfamily protein	protein_coding	5.27726	3.56695	2.94065	127.081	95.5548	85.7365	42.4142	9.63772	37.7139	1.38401	6.19765	3.85886	37.7026	18.0083	31.9881	4.01486	3.67728	7.93441	419	289	240	8270	5989	7021	3318	906	3320	109	648	382	3514	1165	3228	402	306	785
[truncated: 296 more rows]
