# Supplementary material for: Maize leaves salt-responsive genes revealed by comparative transcriptome of salt-tolerant and salt-sensitive cultivars during the seedling stage
Source: PeerJ. 2025 Apr 10;13:e19268. doi: 10.7717/peerj.19268 (PMC11994069; doi:10.7717/peerj.19268)
Supplement: Supplemental Information 5 [file peerj-13-19268-s005.xlsx]

## Sheet: Relative water content 
Relative water content (%)
Days of treatment	ST			SS
0 d	97.32	98.46	98.3	97.82	97.75	98.4
3 d	83.57	82.94	78.78	61.03	61.18	56.38
7 d	65.86	66.13	69.73	38.96	38.59	35.1

## Sheet: Relative electrolyte leakage 
Relative electrolyte leakage (%)
Days of treatment	ST			SS
0 d	7	7.5	7.33	7.55	7.34	7.47
3 d	10.5	10.33	10	14.2	14.72	14.6
7 d	16.67	17.5	17	24.55	24.76	25.43

## Sheet: H2O2 content 
H2O2 content (μmol/g FW)
Days of treatment	ST			SS
0 d	7.66	7.68	6.5	7.21	6.48	7.34
3 d	16.55	15.59	17.57	27.6	29.42	26.33
7 d	37.73	35.64	37.61	53.14	56.96	57

## Sheet: MDA content
MDA content (nmol/g FW)
Days of treatment	ST			SS
0 d	42.47	43.64	45.97	43.51	44.52	42.86
3 d	83.64	83.64	86.3	129.09	124.94	122.26
7 d	143.64	140.13	148.96	180.39	189.22	180.39

## Sheet: SOD 
SOD (U/g FW)
Days of treatment	ST			SS
0 d	67.75	66.58	65.87	65.57	67.67	67.35
3 d	204.47	209.62	207.75	150.98	153.77	153.08
7 d	281.73	277.28	280.56	217.26	215.17	225.86

## Sheet: POD 
POD ( U/g FW)
Days of treatment	ST			SS
0 d	100.82	95.48	95.22	100.27	98.99	95.76
3 d	200.83	210.3	203.9	130.72	134.7	130.51
7 d	290.77	295.83	290.48	230.5	230.68	240.69

## Sheet: Raw data for the qRT-PCR
Raw data for the qRT-PCR
Gene ID	ST0			SS0			ST3			SS3			ST7			SS7
ZmbZIP21	4.52344	4.72874	4.68328	1.93514	2.05778	2.27495	3.19033	3.40274	2.82397	1.42251	1.19511	1.38686	5.92689	5.78459	5.87811	2.61282	3.30107	3.00794
ZmGLK4	4.89022	4.73748	4.40364	1.02473	1.06218	1.10327	3.25882	3.25935	3.1306	1.83143	2.24303	1.99829	6.84556	6.99852	7.09038	1.78312	1.77243	1.59122
ZmNAC47	2.73074	2.15014	2.87725	1.29982	1.29982	1.36375	4.52118	4.4255	4.6159	2.57004	2.40107	2.78783	4.28672	4.39828	4.41414	1.7973	1.93793	2.07418
ZmWRKY38	2.72663	2.74877	2.69763	1.66496	1.16066	1.72287	3.22733	3.49491	3.24359	1.46347	1.39253	1.44081	4.194	4.43753	4.17277	1.36201	1.58849	1.61817
ZmAUX21	0.751093	0.667603	0.722265	2.35712	3.00439	2.71905	0.386707	0.441325	0.474652	3.10733	2.53981	3.11383	0.319593	0.485573	0.314143	2.32287	2.04412	2.24479
ZmbHLH96	0.526396	0.551659	0.558792	2.00122	1.8894	2.19405	1.31912	1.34832	1.71504	2.48314	2.5509	2.45509	0.936143	0.844223	1.05401	1.96133	1.38894	1.43973
ZmBZR7	1.12488	1.18955	1.27427	2.25885	2.30379	2.36517	0.464328	0.716784	0.676537	2.05856	2.34256	2.36276	1.31912	1.34832	1.21504	3.43681	3.53764	3.64121
ZmMYB74	0.963093	1.09281	0.951493	2.33939	2.96835	3.09272	1.29991	1.29379	1.29621	3.74101	3.57087	3.63247	1.16444	1.05899	1.066	4.84323	4.84471	4.94475
